# Supplementary material
Source: publisher site journal article supplement (https://www.dovepress.com/get_supplementary_file.php?f=491315.xlsx)
Supplement: Supplementary file 1 [file get_supplementary_file.php]

## Sheet: Table S1
Table S1. List of 7555 DEGs identified in the GSE196399 dataset.
	logFC	AveExpr	t	P.Value	adj.P.Val	B	change
FCER1A	-3.6216	2.83938	-8.48635	1.31452e-12	2.87928e-11	18.3357	Down
KLRF1	-3.11517	4.37722	-8.68213	5.54571e-13	1.35886e-11	19.186	Down
TCF7	-3.05189	4.55196	-9.00173	1.35693e-13	4.22168e-12	20.5734	Down
LGALS2	-3.01169	3.84389	-5.5191	4.56314e-07	1.92517e-06	5.82222	Down
NOG	-2.96844	1.79306	-11.5752	1.99902e-18	4.18461e-16	31.5395	Down
PLD4	-2.9206	2.31825	-10.8153	5.053e-17	5.7891e-15	28.3571	Down
NELL2	-2.89692	2.80839	-10.4227	2.73851e-16	2.4311e-14	26.6913	Down
LRRN3	-2.82086	1.77898	-11.6835	1.2677e-18	2.91277e-16	31.988	Down
KLRB1	-2.78855	4.50646	-7.07956	6.29523e-10	5.61504e-09	12.2641	Down
LEF1	-2.78458	4.59245	-8.244	3.82572e-12	7.17577e-11	17.2834	Down
BCL11B	-2.78036	4.61337	-9.12521	7.88187e-14	2.6999e-12	21.1089	Down
CCR7	-2.77958	5.23521	-7.87824	1.91456e-11	2.83274e-10	15.6981	Down
MYBL1	-2.72997	3.36299	-9.13243	7.63573e-14	2.63153e-12	21.1402	Down
IL7R	-2.71107	6.52589	-8.27227	3.37765e-12	6.48589e-11	17.4061	Down
SH2D1B	-2.67263	2.93721	-8.88214	2.29737e-13	6.36074e-12	20.0545	Down
TRABD2A	-2.66887	3.20535	-9.07321	9.90773e-14	3.28758e-12	20.8834	Down
KLRC4	-2.64383	2.81925	-9.25503	4.45479e-14	1.64924e-12	21.6714	Down
RORA	-2.60761	3.65376	-9.27721	4.04132e-14	1.52616e-12	21.7674	Down
S1PR5	-2.55671	4.2001	-6.68207	3.50324e-09	2.50849e-08	10.58	Down
CD28	-2.55252	3.96987	-8.68665	5.43632e-13	1.34294e-11	19.2056	Down
GNLY	-2.53022	6.48596	-5.87946	1.04057e-07	5.10381e-07	7.26258	Down
TXK	-2.5193	4.48851	-9.35722	2.8443e-14	1.14014e-12	22.1137	Down
SPOCK2	-2.51808	5.85543	-7.56062	7.71908e-11	9.12089e-10	14.3265	Down
FCMR	-2.51443	5.89307	-8.1561	5.63532e-12	9.7802e-11	16.9021	Down
TNFRSF25	-2.50917	3.87862	-6.83656	1.80191e-09	1.41188e-08	11.232	Down
PTGDR	-2.49942	3.1529	-8.57304	8.96985e-13	2.08346e-11	18.7122	Down
CAMK4	-2.4831	3.06653	-9.87771	2.91712e-15	1.66245e-13	24.3589	Down
FCRL6	-2.47574	4.20898	-6.46972	8.6881e-09	5.61415e-08	9.69004	Down
KLRG1	-2.47322	3.86884	-7.92596	1.55207e-11	2.36238e-10	15.9047	Down
CD1C	-2.46193	2.20427	-8.95643	1.65638e-13	4.91867e-12	20.3769	Down
CD3E	-2.45875	6.16279	-7.0078	8.59386e-10	7.39256e-09	11.9585	Down
RCAN3	-2.45675	4.20874	-8.95885	1.63885e-13	4.87514e-12	20.3874	Down
DYRK2	-2.45572	4.15376	-9.53004	1.33322e-14	5.96464e-13	22.8607	Down
COL6A2	-2.44707	2.77717	-7.76148	3.19824e-11	4.36629e-10	15.1932	Down
DHRS3	-2.44141	2.62509	-11.4375	3.57482e-18	6.44836e-16	30.967	Down
TC2N	-2.44021	4.54236	-8.91291	2.00628e-13	5.7078e-12	20.188	Down
IL2RB	-2.43508	4.44843	-7.5674	7.4933e-11	8.87886e-10	14.3557	Down
CD247	-2.41991	4.23726	-7.38322	1.67734e-10	1.77645e-09	13.5635	Down
MATK	-2.41429	3.56712	-7.69037	4.37015e-11	5.6695e-10	14.886	Down
NCR3	-2.40259	3.53454	-7.75296	3.32008e-11	4.50723e-10	15.1564	Down
ZAP70	-2.3974	5.66165	-6.24526	2.25118e-08	1.30992e-07	8.75822	Down
TESPA1	-2.3943	4.05411	-8.82849	2.9098e-13	7.74955e-12	19.8216	Down
LBH	-2.39395	5.54441	-8.32888	2.63179e-12	5.23763e-11	17.6519	Down
GZMM	-2.38311	5.57146	-6.58342	5.34665e-09	3.6438e-08	10.1656	Down
FGFBP2	-2.37735	5.19421	-5.29619	1.11908e-06	4.35108e-06	4.95036	Down
CD4	-2.37669	5.2893	-6.74842	2.63417e-09	1.953e-08	10.8595	Down
EVL	-2.37211	5.49364	-7.61146	6.17733e-11	7.50844e-10	14.5456	Down
KLF12	-2.36821	3.61007	-9.0838	9.45663e-14	3.15023e-12	20.9294	Down
CD96	-2.36649	4.3985	-8.51883	1.13914e-12	2.5583e-11	18.4768	Down
TMIGD2	-2.36275	2.96499	-8.16047	5.5278e-12	9.63375e-11	16.921	Down
FCRL3	-2.36205	3.42653	-7.64359	5.36569e-11	6.7443e-10	14.6842	Down
CD6	-2.35172	4.93482	-6.72936	2.85916e-09	2.09688e-08	10.7792	Down
LYPD2	-2.35137	1.1675	-9.64989	7.88956e-15	3.81126e-13	23.378	Down
ABLIM1	-2.34726	4.35451	-8.94547	1.73828e-13	5.09934e-12	20.3293	Down
PDZD4	-2.3453	3.13704	-7.02661	7.92105e-10	6.88766e-09	12.0386	Down
TGFBR3	-2.34439	3.18891	-7.96972	1.2803e-11	1.99916e-10	16.0941	Down
TMEM204	-2.33731	3.6176	-7.7648	3.15196e-11	4.31353e-10	15.2075	Down
BCL9L	-2.33555	4.39866	-8.18952	4.86362e-12	8.64439e-11	17.0471	Down
PID1	-2.33465	1.66034	-9.99984	1.71352e-15	1.03766e-13	24.8835	Down
IKZF2	-2.3331	2.53633	-10.416	2.81895e-16	2.47658e-14	26.6627	Down
OXNAD1	-2.33292	4.04665	-9.78575	4.35716e-15	2.33797e-13	23.9633	Down
LTK	-2.32969	2.15862	-7.47591	1.11851e-10	1.2502e-09	13.9618	Down
ADAMTS10	-2.32948	2.43169	-8.33637	2.54632e-12	5.10347e-11	17.6844	Down
KLRC2	-2.32293	1.83048	-8.3337	2.57642e-12	5.14555e-11	17.6728	Down
KLRK1	-2.31803	2.32345	-9.2309	4.95298e-14	1.81388e-12	21.5669	Down
SLC4A10	-2.30627	1.21221	-11.6661	1.36411e-18	3.00387e-16	31.9159	Down
PYHIN1	-2.30554	4.14459	-8.09698	7.31159e-12	1.23155e-10	16.6457	Down
GPA33	-2.29645	2.14466	-10.3901	3.15164e-16	2.71265e-14	26.5528	Down
APBA2	-2.29438	3.31705	-9.0318	1.18876e-13	3.81032e-12	20.7039	Down
KRT72	-2.29269	2.32445	-7.26398	2.82224e-10	2.80832e-09	13.0521	Down
CD5	-2.28347	4.78382	-6.70162	3.22116e-09	2.32615e-08	10.6623	Down
KRT73	-2.28269	1.97756	-8.57039	9.07548e-13	2.10511e-11	18.7007	Down
NMUR1	-2.28256	2.69117	-7.51777	9.31236e-11	1.06545e-09	14.142	Down
GCNT4	-2.27997	1.91968	-11.7532	9.46309e-19	2.35965e-16	32.276	Down
ZNF831	-2.27325	3.22589	-9.15684	6.85855e-14	2.39781e-12	21.246	Down
BACH2	-2.27015	2.95058	-8.79468	3.37725e-13	8.8508e-12	19.6747	Down
UBASH3A	-2.27012	3.4111	-8.51194	1.17426e-12	2.61292e-11	18.4468	Down
NR3C2	-2.26835	2.07662	-11.1055	1.46198e-17	1.95191e-15	29.5793	Down
PARP15	-2.26452	4.54214	-7.288	2.54172e-10	2.55923e-09	13.155	Down
ITK	-2.26155	4.83548	-7.32399	2.17241e-10	2.23515e-09	13.3093	Down
CLIC3	-2.25869	3.73367	-6.57363	5.57539e-09	3.77692e-08	10.1246	Down
TBC1D4	-2.2576	2.97894	-8.22848	4.09647e-12	7.57019e-11	17.2161	Down
CD3G	-2.25518	4.50262	-7.27295	2.71403e-10	2.71339e-09	13.0906	Down
EPHX2	-2.25052	2.39911	-10.4674	2.25683e-16	2.10095e-14	26.882	Down
ADGRG1	-2.24921	3.84648	-5.94815	7.82282e-08	3.94538e-07	7.54104	Down
TIGIT	-2.24823	2.77642	-7.62975	5.70136e-11	7.05906e-10	14.6245	Down
KLRC3	-2.24479	2.04612	-8.36768	2.21798e-12	4.56963e-11	17.8204	Down
ETS1	-2.23828	6.99296	-7.67394	4.69673e-11	6.03317e-10	14.8152	Down
GIMAP5	-2.23823	3.15882	-8.63455	6.83964e-13	1.64035e-11	18.9794	Down
GZMK	-2.23674	4.24198	-6.29864	1.79652e-08	1.07135e-07	8.97891	Down
SKAP1	-2.22936	4.39109	-7.74626	3.41935e-11	4.61612e-10	15.1274	Down
LTBP3	-2.22122	2.90734	-8.03249	9.71216e-12	1.57346e-10	16.3661	Down
TBX21	-2.21677	4.84814	-6.58679	5.27018e-09	3.59747e-08	10.1797	Down
APBB1	-2.21641	3.07069	-8.41759	1.77995e-12	3.77733e-11	18.0371	Down
CD8B	-2.21318	3.65043	-6.43939	9.88595e-09	6.28991e-08	9.56356	Down
TGFBI	-2.20488	4.2993	-5.3652	8.49006e-07	3.38166e-06	5.21859	Down
GATA2	-2.19992	2.57981	-7.45059	1.2495e-10	1.37397e-09	13.8529	Down
GPRASP1	-2.19756	2.60727	-8.2403	3.88855e-12	7.26149e-11	17.2674	Down
AMIGO1	-2.19235	2.20027	-10.0057	1.67066e-15	1.01533e-13	24.9084	Down
CSF1R	-2.19158	4.93093	-5.83988	1.22588e-07	5.9001e-07	7.10269	Down
SIRPG	-2.18797	3.37126	-7.74316	3.4661e-11	4.66927e-10	15.1141	Down
GPR174	-2.1878	3.72685	-7.68289	4.51597e-11	5.83634e-10	14.8538	Down
MS4A1	-2.18396	4.71132	-5.78746	1.52229e-07	7.14814e-07	6.89149	Down
ABCB1	-2.18283	2.2016	-10.0376	1.4537e-15	9.09557e-14	25.0456	Down
LCK	-2.18089	5.76925	-6.31308	1.68999e-08	1.01543e-07	9.03872	Down
NT5E	-2.18063	1.84705	-10.7704	6.12744e-17	6.61763e-15	28.1671	Down
HDC	-2.17663	2.07335	-6.03565	5.43087e-08	2.85184e-07	7.89741	Down
PLCG1	-2.17485	4.26653	-6.65978	3.85493e-09	2.72806e-08	10.4862	Down
NFATC2	-2.16633	3.96171	-7.99047	1.16857e-11	1.85008e-10	16.184	Down
GATA3	-2.16537	3.27906	-8.13939	6.0656e-12	1.04627e-10	16.8296	Down
ARL4C	-2.16533	6.02784	-6.58865	5.22832e-09	3.57033e-08	10.1876	Down
NLRC3	-2.16356	4.66979	-7.84592	2.20682e-11	3.20641e-10	15.5583	Down
LILRA4	-2.14017	1.17021	-15.4436	4.09131e-25	1.1562e-21	46.662	Down
XCL2	-2.13879	2.81473	-6.65648	3.90979e-09	2.76112e-08	10.4724	Down
DTHD1	-2.13317	2.22127	-9.07158	9.97877e-14	3.30469e-12	20.8764	Down
SYTL2	-2.13123	2.52418	-9.40377	2.31888e-14	9.52032e-13	22.315	Down
CD160	-2.1246	1.72285	-8.58328	8.57392e-13	2.00523e-11	18.7567	Down
GOLGA8B	-2.12317	3.80451	-7.13154	5.02291e-10	4.61617e-09	12.4859	Down
STMN3	-2.12268	4.01707	-7.18257	4.02326e-10	3.79835e-09	12.7038	Down
PLEKHA1	-2.12118	2.6325	-9.77197	4.62735e-15	2.45192e-13	23.904	Down
TRAF5	-2.11857	3.449	-8.32679	2.65612e-12	5.27367e-11	17.6428	Down
NMT2	-2.11354	2.42723	-10.432	2.63017e-16	2.35964e-14	26.7311	Down
SAMD3	-2.10452	3.12129	-7.68426	4.48872e-11	5.80555e-10	14.8597	Down
PLA2G7	-2.10341	1.85855	-9.1121	8.34998e-14	2.83164e-12	21.052	Down
EOMES	-2.1025	3.30477	-7.45605	1.22003e-10	1.34855e-09	13.8764	Down
SBK1	-2.10114	3.02372	-7.28867	2.53428e-10	2.55325e-09	13.1579	Down
CD2	-2.09974	5.93483	-6.38317	1.25546e-08	7.76101e-08	9.32961	Down
PRF1	-2.09621	7.2373	-5.72277	1.98676e-07	9.08018e-07	6.6319	Down
SCART1	-2.09052	1.47872	-9.5524	1.2088e-14	5.48034e-13	22.9573	Down
FMNL3	-2.09029	2.95003	-9.29409	3.75261e-14	1.44284e-12	21.8405	Down
THEM4	-2.0868	2.79776	-9.18828	5.97326e-14	2.13677e-12	21.3822	Down
KLRD1	-2.08105	3.7993	-6.96318	1.04263e-09	8.7389e-09	11.7688	Down
FCGBP	-2.07505	1.71506	-9.36455	2.75422e-14	1.11192e-12	22.1454	Down
PIGL	-2.07249	2.34719	-10.2222	6.52114e-16	4.93627e-14	25.8359	Down
THEMIS	-2.0676	4.10652	-7.21064	3.56052e-10	3.42759e-09	12.8239	Down
MAN1C1	-2.06261	2.24955	-10.4664	2.26748e-16	2.10095e-14	26.8773	Down
CARD11	-2.06175	4.58386	-6.80663	2.05016e-09	1.57368e-08	11.1054	Down
RASGRP1	-2.05384	3.53803	-8.26635	3.46679e-12	6.61969e-11	17.3805	Down
CARNS1	-2.05254	2.1476	-7.50973	9.64625e-11	1.09626e-09	14.1073	Down
GRAP	-2.05253	3.84712	-7.36524	1.81439e-10	1.90259e-09	13.4863	Down
TARBP1	-2.05251	3.10359	-8.7225	4.64179e-13	1.17657e-11	19.3613	Down
TPPP3	-2.05225	1.6452	-7.70202	4.15223e-11	5.462e-10	14.9364	Down
RUNX3	-2.04579	5.75944	-6.33645	1.5307e-08	9.27941e-08	9.1356	Down
RASGRF2	-2.04264	1.98794	-10.98	2.4975e-17	3.13686e-15	29.0516	Down
PCED1B	-2.04154	4.78828	-7.31794	2.23054e-10	2.29201e-09	13.2833	Down
SH2D2A	-2.0392	4.00784	-6.69103	3.371e-09	2.42198e-08	10.6177	Down
INPP4B	-2.03472	2.6599	-9.0428	1.1326e-13	3.65102e-12	20.7516	Down
CD8A	-2.03433	5.30216	-5.30201	1.09338e-06	4.26193e-06	4.97291	Down
VSIG1	-2.03339	1.80811	-9.79872	4.11733e-15	2.24481e-13	24.0191	Down
PIK3IP1	-2.03075	5.9801	-7.01446	8.34935e-10	7.212e-09	11.9869	Down
PRKCQ	-2.02955	4.24763	-7.90318	1.71566e-11	2.57668e-10	15.8061	Down
P2RY10	-2.02845	3.68725	-7.65274	5.15443e-11	6.52228e-10	14.7237	Down
SORBS3	-2.02706	2.42525	-9.04185	1.13733e-13	3.6593e-12	20.7474	Down
CX3CR1	-2.02399	5.75794	-5.50316	4.86786e-07	2.037e-06	5.75933	Down
MAL	-2.02118	4.0949	-6.81265	1.99765e-09	1.53825e-08	11.1308	Down
TCL1A	-2.01998	3.56122	-5.14735	2.02034e-06	7.47803e-06	4.37729	Down
SH2D1A	-2.01877	3.06597	-7.29685	2.44549e-10	2.48297e-09	13.1929	Down
PLXDC1	-2.01171	1.5589	-9.44214	1.95969e-14	8.34886e-13	22.481	Down
SPON2	-2.00663	4.0341	-6.14869	3.38125e-08	1.87422e-07	8.36045	Down
GPR183	-2.00528	4.4384	-7.2066	3.6237e-10	3.4769e-09	12.8066	Down
PRKCH	-2.00448	4.58563	-8.19757	4.6943e-12	8.38742e-11	17.082	Down
TRIB2	-2.0014	4.47385	-6.54439	6.31763e-09	4.22404e-08	10.0021	Down
IKZF3	-2.00034	4.9877	-6.95525	1.07903e-09	9.00842e-09	11.7351	Down
IL11RA	-1.99727	3.31264	-6.63505	4.28613e-09	2.98708e-08	10.3823	Down
GZMH	-1.9944	6.39206	-4.24986	6.02472e-05	0.000166025	1.10605	Down
CD244	-1.99427	4.50764	-6.89937	1.37397e-09	1.11203e-08	11.498	Down
CTSW	-1.99399	5.86726	-5.0721	2.71626e-06	9.75781e-06	4.09052	Down
SEMA4C	-1.99337	2.63274	-8.88193	2.29956e-13	6.36074e-12	20.0535	Down
TRAT1	-1.99214	3.98379	-6.71407	3.05332e-09	2.21949e-08	10.7148	Down
CMKLR1	-1.99127	2.67816	-7.44234	1.29539e-10	1.41912e-09	13.8175	Down
S100B	-1.98872	1.80494	-7.11205	5.46693e-10	4.9677e-09	12.4027	Down
PRR5L	-1.98805	3.77829	-7.29217	2.49587e-10	2.51904e-09	13.1729	Down
ABCD2	-1.97926	2.41019	-9.26313	4.29925e-14	1.60724e-12	21.7064	Down
LGR6	-1.977	1.98096	-7.45146	1.24476e-10	1.37053e-09	13.8567	Down
CACNA2D2	-1.97695	1.88373	-7.5235	9.08195e-11	1.04332e-09	14.1666	Down
PTPN4	-1.97628	3.536	-8.60135	7.91764e-13	1.87241e-11	18.8352	Down
LY9	-1.97287	2.97697	-8.50017	1.23681e-12	2.72709e-11	18.3957	Down
CD79A	-1.96355	5.77476	-4.96301	4.15787e-06	1.44026e-05	3.67848	Down
BCAS4	-1.95534	2.64336	-8.69859	5.1577e-13	1.28232e-11	19.2575	Down
ANO9	-1.95487	2.94557	-5.80074	1.44109e-07	6.80646e-07	6.94494	Down
CDKN1C	-1.94515	2.6014	-6.77278	2.37199e-09	1.78515e-08	10.9624	Down
KLRC1	-1.93998	2.01337	-7.37711	1.72275e-10	1.81886e-09	13.5372	Down
SH3YL1	-1.93735	2.35442	-10.5888	1.33735e-16	1.35785e-14	27.3978	Down
PTGDR2	-1.93688	1.71652	-7.47919	1.10257e-10	1.23319e-09	13.9759	Down
GOLGA8A	-1.93679	3.60845	-6.06595	4.78425e-08	2.543e-07	8.02126	Down
ENOSF1	-1.93651	2.26129	-10.141	9.27433e-16	6.49816e-14	25.4887	Down
EPHA4	-1.93648	1.75088	-11.2259	8.7602e-18	1.37535e-15	30.0839	Down
STAT4	-1.9343	4.43683	-8.22347	4.18793e-12	7.69346e-11	17.1944	Down
LDLRAP1	-1.93297	4.91512	-7.48381	1.08048e-10	1.21329e-09	13.9958	Down
NEURL1	-1.93287	1.35719	-11.3103	6.12402e-18	1.03839e-15	30.4367	Down
CD3D	-1.9252	4.38914	-5.02291	3.29279e-06	1.16471e-05	3.90417	Down
FCER2	-1.92497	3.15311	-5.95247	7.68315e-08	3.88882e-07	7.55862	Down
ZC3H12D	-1.92105	3.18806	-7.82291	2.44167e-11	3.48787e-10	15.4588	Down
ZNF548	-1.92026	2.65841	-8.7409	4.28021e-13	1.093e-11	19.4412	Down
HAPLN3	-1.91977	3.56012	-6.2524	2.18434e-08	1.27584e-07	8.7877	Down
SLC4A7	-1.9194	3.35975	-8.31713	2.77167e-12	5.4647e-11	17.6009	Down
MPRIP	-1.9189	4.19774	-8.17201	5.25368e-12	9.19313e-11	16.9711	Down
PASK	-1.90882	2.52587	-7.81316	2.54862e-11	3.62842e-10	15.4166	Down
NR1D2	-1.90852	3.54104	-8.07354	8.10659e-12	1.34496e-10	16.544	Down
ZBTB4	-1.90364	4.64482	-8.48218	1.33888e-12	2.92176e-11	18.3176	Down
ARHGEF10L	-1.90356	2.20014	-7.34491	1.98285e-10	2.05761e-09	13.399	Down
FYN	-1.90237	5.46814	-7.3349	2.07139e-10	2.14292e-09	13.3561	Down
CEP78	-1.90178	2.70058	-8.05832	8.6683e-12	1.42966e-10	16.4781	Down
SIDT1	-1.9	3.29056	-7.88456	1.86208e-11	2.75991e-10	15.7255	Down
EDAR	-1.89954	1.33897	-11.5488	2.23425e-18	4.35448e-16	31.4299	Down
SLC38A1	-1.89775	5.28983	-7.77128	3.06352e-11	4.21632e-10	15.2355	Down
ZBTB25	-1.89669	3.14904	-8.96062	1.62612e-13	4.85431e-12	20.3951	Down
ZNF573	-1.89616	1.91705	-11.5407	2.31233e-18	4.45544e-16	31.3961	Down
IFFO2	-1.89598	3.67506	-7.29489	2.46647e-10	2.49382e-09	13.1845	Down
CIITA	-1.89544	3.96637	-6.88106	1.48705e-09	1.19274e-08	11.4204	Down
ZNF703	-1.89528	1.90446	-6.75484	2.5624e-09	1.90813e-08	10.8866	Down
NCALD	-1.89461	2.1129	-9.2225	5.13923e-14	1.874e-12	21.5305	Down
TTC39B	-1.89433	2.71462	-9.53731	1.29138e-14	5.79276e-13	22.8921	Down
TRAF1	-1.8923	4.55163	-7.26474	2.81299e-10	2.80241e-09	13.0554	Down
OBSCN	-1.8888	1.84632	-8.99981	1.36847e-13	4.24202e-12	20.5651	Down
NOXA1	-1.88483	2.66348	-7.3154	2.25537e-10	2.31209e-09	13.2725	Down
ENHO	-1.87941	0.837824	-16.5911	6.09116e-27	2.58204e-23	50.7695	Down
PAX5	-1.87743	2.99818	-5.87434	1.06288e-07	5.18624e-07	7.24188	Down
CD248	-1.87517	1.49924	-9.73607	5.41299e-15	2.81542e-13	23.7494	Down
PLEKHF1	-1.86498	3.37324	-6.79573	2.14871e-09	1.64263e-08	11.0593	Down
ANKRD36C	-1.86459	2.50637	-8.51538	1.15663e-12	2.5873e-11	18.4618	Down
PGAP3	-1.86401	3.17632	-7.27518	2.68775e-10	2.69188e-09	13.1001	Down
BIN1	-1.86381	4.12493	-6.9245	1.23256e-09	1.01256e-08	11.6046	Down
PRKACB	-1.86142	4.49267	-7.61823	5.99684e-11	7.36211e-10	14.5748	Down
CROCC	-1.85772	2.84907	-6.95784	1.06698e-09	8.92539e-09	11.7462	Down
CDC25B	-1.85747	5.6542	-6.17558	3.01963e-08	1.69483e-07	8.47103	Down
TSEN54	-1.85516	3.42546	-6.21082	2.60319e-08	1.48869e-07	8.61613	Down
SIGIRR	-1.85144	5.20814	-5.97704	6.9359e-08	3.54766e-07	7.65852	Down
BCL2	-1.8502	3.87322	-7.27391	2.70277e-10	2.70533e-09	13.0946	Down
PTCH1	-1.85017	1.82585	-9.64175	8.17547e-15	3.93816e-13	23.3429	Down
CBLB	-1.84786	3.35798	-8.6281	7.03691e-13	1.67346e-11	18.9514	Down
SYNJ2BP	-1.84557	2.59032	-8.52955	1.08656e-12	2.46636e-11	18.5233	Down
CLDND2	-1.84553	3.68042	-6.57723	5.49016e-09	3.72663e-08	10.1397	Down
MAP3K7CL	-1.8449	4.24252	-4.70726	1.10965e-05	3.51491e-05	2.73069	Down
TNFRSF13C	-1.84443	3.60235	-5.86986	1.08278e-07	5.2727e-07	7.22378	Down
CXCR5	-1.8393	2.54843	-6.89487	1.40092e-09	1.13168e-08	11.4789	Down
GGT7	-1.83914	3.32385	-6.39896	1.17405e-08	7.3215e-08	9.39524	Down
RFTN1	-1.83156	3.9624	-7.62982	5.6996e-11	7.05906e-10	14.6248	Down
ALDH1A1	-1.83034	3.54576	-6.38153	1.26424e-08	7.80926e-08	9.32279	Down
DOCK9	-1.82965	2.6886	-9.76897	4.68847e-15	2.47656e-13	23.8911	Down
TTC24	-1.82821	1.77523	-8.24669	3.78065e-12	7.11434e-11	17.2951	Down
BANK1	-1.82678	3.66962	-6.43715	9.98054e-09	6.34296e-08	9.55424	Down
ITGA6	-1.82677	4.13026	-8.61245	7.5396e-13	1.78799e-11	18.8834	Down
RNF125	-1.82473	4.02795	-7.7565	3.26894e-11	4.44848e-10	15.1717	Down
GAL3ST4	-1.82314	1.85423	-8.68364	5.50883e-13	1.35234e-11	19.1926	Down
KLHL3	-1.82312	1.39596	-11.9694	3.83333e-19	1.12066e-16	33.1657	Down
ZNF512B	-1.82239	2.61179	-7.32791	2.13555e-10	2.19856e-09	13.3261	Down
NR1D1	-1.82189	2.56533	-8.47133	1.40453e-12	3.04543e-11	18.2704	Down
MAF	-1.8207	3.61907	-6.90649	1.33231e-09	1.084e-08	11.5282	Down
ZNF154	-1.81571	1.84018	-9.12784	7.79138e-14	2.67431e-12	21.1203	Down
TRAPPC6A	-1.81445	4.30052	-6.69702	3.28537e-09	2.36748e-08	10.6429	Down
IL32	-1.81017	6.06048	-5.32247	1.00756e-06	3.95649e-06	5.05229	Down
FLT3LG	-1.80772	2.18974	-7.67863	4.60114e-11	5.93285e-10	14.8354	Down
CLEC10A	-1.80746	2.53539	-5.77022	1.6344e-07	7.62047e-07	6.8222	Down
ZNF337	-1.80625	3.23757	-8.14289	5.97284e-12	1.03342e-10	16.8448	Down
ADGRG5	-1.80587	3.2706	-6.72467	2.91739e-09	2.13284e-08	10.7594	Down
ADGRL1	-1.80463	2.1451	-9.07687	9.74934e-14	3.24137e-12	20.8993	Down
ZNF91	-1.80368	2.70927	-9.44903	1.90141e-14	8.14149e-13	22.5107	Down
SLAMF6	-1.8036	5.21647	-6.0085	6.08287e-08	3.15031e-07	7.78668	Down
C12orf57	-1.80151	4.75084	-4.79262	8.01776e-06	2.61089e-05	3.04409	Down
HEG1	-1.80115	2.61819	-8.36227	2.27151e-12	4.65728e-11	17.7969	Down
LTBP4	-1.7986	2.90499	-6.36474	1.35763e-08	8.31947e-08	9.25303	Down
ZNF83	-1.79833	3.39235	-7.66685	4.84506e-11	6.17227e-10	14.7846	Down
ECHDC2	-1.79789	2.82294	-6.94835	1.1117e-09	9.23113e-09	11.7059	Down
SPN	-1.79555	5.49554	-6.28047	1.94e-08	1.14735e-07	8.90374	Down
ITFG2	-1.79366	3.57494	-7.97775	1.23583e-11	1.93666e-10	16.1289	Down
PLEKHB1	-1.79316	2.01976	-8.15766	5.59666e-12	9.74302e-11	16.9088	Down
GCSAM	-1.79158	2.21985	-8.82454	2.96085e-13	7.8385e-12	19.8044	Down
CD27	-1.79138	5.26973	-5.15297	1.97605e-06	7.32531e-06	4.39877	Down
FBXO32	-1.78823	2.49192	-8.71752	4.74486e-13	1.19901e-11	19.3397	Down
DOCK10	-1.78816	4.37895	-7.47978	1.09971e-10	1.23162e-09	13.9785	Down
MYOM2	-1.78702	1.76017	-4.47385	2.65968e-05	7.82807e-05	1.88967	Down
FASLG	-1.78455	2.53442	-6.73388	2.80407e-09	2.06094e-08	10.7983	Down
ITPR3	-1.78352	3.72262	-6.12156	3.7894e-08	2.06779e-07	8.24906	Down
BLK	-1.78232	3.24918	-6.20182	2.70381e-08	1.53947e-07	8.57904	Down
ITGA4	-1.78146	5.74641	-6.84135	1.76506e-09	1.38557e-08	11.2523	Down
ATP6V0E2	-1.78134	2.51457	-8.49426	1.2695e-12	2.79553e-11	18.37	Down
ABI3	-1.78108	4.86872	-7.26142	2.85395e-10	2.83755e-09	13.0412	Down
ATF7IP2	-1.78047	2.79085	-8.92351	1.91474e-13	5.50552e-12	20.234	Down
CLEC2D	-1.77814	5.28353	-7.78022	2.94548e-11	4.08369e-10	15.2742	Down
MAGEE1	-1.77325	1.81187	-8.68521	5.47087e-13	1.34832e-11	19.1994	Down
ZNF439	-1.77315	2.4584	-9.72714	5.6284e-15	2.88323e-13	23.7109	Down
HIP1R	-1.77289	3.29466	-6.40622	1.13835e-08	7.14616e-08	9.42547	Down
TIAM1	-1.77075	3.15384	-6.77745	2.32471e-09	1.7558e-08	10.9821	Down
ATP8B2	-1.77014	4.82424	-5.92112	8.75338e-08	4.35128e-07	7.43132	Down
PPP1R16B	-1.76952	4.28881	-6.59144	5.16643e-09	3.53376e-08	10.1992	Down
TTC16	-1.76578	2.46884	-6.18474	2.90548e-08	1.6389e-07	8.50871	Down
MTSS1	-1.76528	3.93846	-7.19753	3.76967e-10	3.59832e-09	12.7678	Down
ZFYVE28	-1.76479	2.29142	-8.14306	5.96833e-12	1.03342e-10	16.8455	Down
MTR	-1.76462	2.95398	-8.82436	2.96324e-13	7.8385e-12	19.8036	Down
CASD1	-1.76423	3.19263	-8.5916	8.26531e-13	1.94109e-11	18.7928	Down
CNR2	-1.76247	2.23452	-7.76519	3.14652e-11	4.31263e-10	15.2092	Down
LLGL2	-1.76194	2.90346	-6.66475	3.77361e-09	2.67721e-08	10.5071	Down
AK5	-1.76097	1.16055	-12.55	3.4733e-20	1.40222e-17	35.5286	Down
ZNF540	-1.76031	1.45123	-12.0661	2.56297e-19	8.07394e-17	33.562	Down
PAQR8	-1.75925	3.19905	-8.25153	3.7008e-12	6.98959e-11	17.3161	Down
CD22	-1.75832	3.70884	-5.16221	1.90518e-06	7.08271e-06	4.43418	Down
ZNF33B	-1.75739	2.89212	-8.95125	1.69461e-13	5.0059e-12	20.3544	Down
SCML4	-1.75563	3.96673	-8.0348	9.61395e-12	1.56294e-10	16.3761	Down
RPL22	-1.75442	4.75803	-5.08463	2.58594e-06	9.3451e-06	4.13814	Down
ZNF141	-1.75287	2.58866	-10.1948	7.34296e-16	5.437e-14	25.7189	Down
AXIN2	-1.75097	1.453	-9.83462	3.52031e-15	1.938e-13	24.1736	Down
MAP4K1	-1.75034	4.69085	-5.73813	1.86521e-07	8.57321e-07	6.69343	Down
KLHDC4	-1.75018	3.34479	-7.24698	3.03933e-10	2.98407e-09	12.9793	Down
POU6F1	-1.7493	2.10283	-9.01754	1.26572e-13	3.98914e-12	20.642	Down
CRTAM	-1.74853	2.33139	-6.93862	1.1595e-09	9.58581e-09	11.6646	Down
CHD6	-1.74808	3.15912	-8.83569	2.81902e-13	7.56319e-12	19.8528	Down
ZNF783	-1.74784	2.91468	-7.61809	6.00049e-11	7.36211e-10	14.5742	Down
PRSS23	-1.74515	1.55065	-7.62832	5.73732e-11	7.09569e-10	14.6183	Down
RBM19	-1.7431	3.7864	-7.90874	1.67426e-11	2.52794e-10	15.8301	Down
TTC12	-1.74162	2.54881	-9.19265	5.85978e-14	2.10505e-12	21.4011	Down
ICOS	-1.74141	3.03942	-6.78755	2.22583e-09	1.69106e-08	11.0247	Down
APOL3	-1.74073	4.80898	-6.40983	1.12104e-08	7.04273e-08	9.44047	Down
GZMA	-1.74064	6.11631	-4.04958	0.000122799	0.000319207	0.426432	Down
NSMF	-1.73896	3.48592	-6.31756	1.65819e-08	9.9809e-08	9.05731	Down
DPP4	-1.73858	1.88624	-9.78596	4.3533e-15	2.33797e-13	23.9642	Down
TTC3	-1.73846	3.90871	-7.41235	1.47686e-10	1.59603e-09	13.6886	Down
ENGASE	-1.73806	4.18323	-6.08824	4.35775e-08	2.34182e-07	8.11249	Down
HPCAL4	-1.73703	1.49692	-9.95514	2.08162e-15	1.24721e-13	24.6916	Down
PRR5	-1.73687	3.26252	-8.48687	1.3115e-12	2.87928e-11	18.338	Down
CD79B	-1.73592	4.2509	-5.39819	7.43649e-07	2.99722e-06	5.34733	Down
RASA3	-1.73226	6.15983	-7.29527	2.46239e-10	2.49267e-09	13.1862	Down
AHNAK	-1.72984	7.66694	-5.34767	9.10849e-07	3.60765e-06	5.15029	Down
CCDC88C	-1.72887	4.90816	-7.42775	1.38076e-10	1.49982e-09	13.7547	Down
MDFIC	-1.72863	3.94673	-6.79343	2.17012e-09	1.6575e-08	11.0496	Down
ZFP3	-1.72774	2.34592	-9.72813	5.60408e-15	2.87948e-13	23.7152	Down
CRIP2	-1.72716	1.67555	-7.88243	1.87959e-11	2.78343e-10	15.7162	Down
DBP	-1.7265	2.46295	-9.4314	2.05423e-14	8.70786e-13	22.4345	Down
PLCH2	-1.72506	1.76217	-6.99383	9.13031e-10	7.79627e-09	11.8991	Down
SLAMF1	-1.72433	3.31669	-7.0052	8.69121e-10	7.46168e-09	11.9475	Down
RPL23A	-1.72333	8.04033	-4.41899	3.25594e-05	9.43237e-05	1.69553	Down
GALNT12	-1.72321	1.84321	-8.85857	2.54871e-13	6.93675e-12	19.9521	Down
CAMK2D	-1.72279	2.35873	-8.95009	1.70329e-13	5.01381e-12	20.3494	Down
EXOG	-1.72076	2.77654	-8.32856	2.63547e-12	5.23881e-11	17.6505	Down
C1orf21	-1.72047	2.0094	-7.98287	1.20831e-11	1.90056e-10	16.1511	Down
YPEL1	-1.72014	3.2432	-7.10578	5.6179e-10	5.08309e-09	12.3759	Down
ZNF600	-1.72013	2.58894	-8.44753	1.55987e-12	3.36502e-11	18.1671	Down
AKAP11	-1.71921	3.89621	-8.02029	1.02483e-11	1.64867e-10	16.3132	Down
CCL5	-1.71829	7.89609	-4.22619	6.55995e-05	0.00017952	1.02468	Down
FCRLA	-1.71822	2.73489	-5.75682	1.72716e-07	8.02067e-07	6.76838	Down
OSBPL5	-1.71804	3.46251	-6.72882	2.86574e-09	2.1008e-08	10.7769	Down
SLC2A4RG	-1.71548	4.19249	-6.57792	5.47403e-09	3.71866e-08	10.1426	Down
PPP3CC	-1.71474	4.5288	-7.38611	1.65634e-10	1.7586e-09	13.5759	Down
EXOSC6	-1.71305	3.73139	-7.1753	4.15258e-10	3.90739e-09	12.6727	Down
DDHD2	-1.71228	2.8117	-8.34339	2.46871e-12	4.9946e-11	17.7149	Down
ZNF84	-1.71175	2.33006	-9.87589	2.9403e-15	1.66245e-13	24.3511	Down
SLC7A6	-1.71138	4.74032	-7.67245	4.72747e-11	6.06346e-10	14.8087	Down
NBPF15	-1.71061	3.43004	-6.67248	3.65052e-09	2.59749e-08	10.5396	Down
AGFG2	-1.7097	2.66789	-8.3712	2.1839e-12	4.51294e-11	17.8356	Down
TRMT13	-1.7094	3.38402	-7.77703	2.98703e-11	4.13792e-10	15.2604	Down
C5orf63	-1.70899	1.67507	-11.1193	1.37843e-17	1.86029e-15	29.6373	Down
LDHB	-1.70696	3.28236	-6.53883	6.46968e-09	4.3121e-08	9.97882	Down
TTYH2	-1.70678	3.02425	-6.90396	1.34696e-09	1.09278e-08	11.5175	Down
FAM169A	-1.70489	1.7159	-10.0279	1.51688e-15	9.4213e-14	25.0036	Down
SCML1	-1.70412	2.02859	-8.39201	1.99245e-12	4.18118e-11	17.926	Down
MTX3	-1.70097	2.85901	-7.19219	3.85835e-10	3.66922e-09	12.7449	Down
ZNF550	-1.70012	1.9831	-9.16383	6.65121e-14	2.35444e-12	21.2763	Down
ZXDB	-1.69818	2.44902	-8.21148	4.41514e-12	7.98114e-11	17.1423	Down
SLC39A10	-1.69791	3.19291	-8.23686	3.948e-12	7.35629e-11	17.2525	Down
TTC39C	-1.69747	3.76168	-7.83478	2.31762e-11	3.34447e-10	15.5101	Down
CYSLTR2	-1.69634	1.69089	-9.06844	1.01175e-13	3.3441e-12	20.8628	Down
FAM117B	-1.69494	3.51625	-7.27251	2.71932e-10	2.71707e-09	13.0887	Down
COLQ	-1.69494	1.71572	-10.0839	1.18854e-15	7.96557e-14	25.2441	Down
CCDC65	-1.69443	1.78062	-6.68209	3.503e-09	2.50849e-08	10.5801	Down
AUTS2	-1.69359	1.43605	-10.847	4.41092e-17	5.15804e-15	28.4911	Down
KIR2DL3	-1.69258	1.79325	-6.72748	2.88235e-09	2.11206e-08	10.7713	Down
ZMAT1	-1.68967	3.2051	-7.83534	2.31195e-11	3.34198e-10	15.5125	Down
SYNE2	-1.6887	4.59077	-7.08498	6.14905e-10	5.50202e-09	12.2872	Down
SNED1	-1.68814	1.20994	-12.6729	2.10002e-20	1.01737e-17	36.0235	Down
MYCL	-1.68754	2.67409	-6.20082	2.71519e-08	1.54441e-07	8.57494	Down
ATM	-1.68748	4.79114	-7.77241	3.0483e-11	4.2022e-10	15.2404	Down
KANTR	-1.68714	1.8827	-10.7905	5.61954e-17	6.18734e-15	28.2524	Down
SARM1	-1.68711	2.47515	-8.91784	1.96312e-13	5.62245e-12	20.2094	Down
ZNF354B	-1.68647	2.44446	-8.35954	2.29904e-12	4.70236e-11	17.785	Down
ITGB7	-1.68503	5.49753	-4.94084	4.5313e-06	1.55501e-05	3.59531	Down
CCDC50	-1.6847	3.06663	-7.33122	2.1049e-10	2.17097e-09	13.3403	Down
SLC12A7	-1.68443	4.54195	-5.73817	1.86488e-07	8.57321e-07	6.6936	Down
CD40LG	-1.68437	1.7143	-10.4602	2.32868e-16	2.13433e-14	26.8511	Down
CTSF	-1.68432	1.80785	-7.62145	5.91277e-11	7.28082e-10	14.5887	Down
SMYD5	-1.68424	2.76992	-7.40607	1.51796e-10	1.63005e-09	13.6616	Down
TYSND1	-1.68351	3.38789	-8.13734	6.1208e-12	1.05472e-10	16.8207	Down
MTERF4	-1.68153	3.43094	-9.50329	1.49895e-14	6.60162e-13	22.7452	Down
ZNF354C	-1.67853	1.8509	-10.5204	1.79593e-16	1.73022e-14	27.1072	Down
MS4A7	-1.67739	4.34655	-5.25604	1.3133e-06	5.04151e-06	4.79502	Down
ELK4	-1.67671	4.34769	-7.99516	1.14467e-11	1.81903e-10	16.2044	Down
CHIC1	-1.67519	2.10218	-8.56954	9.10963e-13	2.11015e-11	18.697	Down
KIR3DL1	-1.67516	1.84571	-6.17396	3.04031e-08	1.70362e-07	8.46436	Down
ID3	-1.67505	2.37209	-7.41184	1.4802e-10	1.59861e-09	13.6864	Down
GPR68	-1.67417	2.36834	-7.17255	4.20249e-10	3.94997e-09	12.661	Down
CTSO	-1.67378	2.54055	-8.52673	1.10015e-12	2.4859e-11	18.5111	Down
USP36	-1.67377	3.56984	-6.83496	1.81445e-09	1.41778e-08	11.2252	Down
ZNF736	-1.67286	2.59527	-9.06129	1.04409e-13	3.43094e-12	20.8318	Down
ZNF256	-1.67241	1.97516	-9.55479	1.19621e-14	5.47574e-13	22.9676	Down
PHF10	-1.67157	3.93682	-6.73073	2.84237e-09	2.08547e-08	10.785	Down
CA5B	-1.6712	2.94686	-8.6655	5.96737e-13	1.45169e-11	19.1138	Down
FAM24B	-1.67051	2.27631	-7.66239	4.94085e-11	6.28013e-10	14.7653	Down
RPL13	-1.67046	8.21093	-6.09673	4.20539e-08	2.27091e-07	8.14727	Down
NUP43	-1.6699	3.79499	-7.84835	2.18338e-11	3.18601e-10	15.5688	Down
SFI1	-1.66981	3.80088	-7.78304	2.90924e-11	4.05001e-10	15.2864	Down
VEGFB	-1.66921	3.40804	-7.39508	1.59266e-10	1.69844e-09	13.6144	Down
RPL3	-1.66748	8.21987	-5.11379	2.30599e-06	8.44135e-06	4.24914	Down
DTX3	-1.66514	2.47463	-5.63883	2.80245e-07	1.23972e-06	6.29677	Down
SNRPN	-1.6649	2.33191	-9.29004	3.81998e-14	1.45882e-12	21.8229	Down
ZNF121	-1.66337	3.55268	-7.59622	6.60406e-11	7.98042e-10	14.4799	Down
KLHDC1	-1.6628	1.92978	-9.58874	1.03103e-14	4.8427e-13	23.1141	Down
NAT10	-1.66259	3.76475	-7.49643	1.02244e-10	1.15731e-09	14.0501	Down
TTC9	-1.66215	2.95734	-8.28284	3.22381e-12	6.24006e-11	17.452	Down
PHC1	-1.6621	2.75018	-6.73749	2.76091e-09	2.03362e-08	10.8135	Down
ANKRD36	-1.66199	2.60053	-7.19744	3.77106e-10	3.59832e-09	12.7674	Down
ADAM28	-1.66059	2.80986	-7.16999	4.24953e-10	3.98094e-09	12.6501	Down
URI1	-1.66055	3.83188	-7.4684	1.15587e-10	1.28265e-09	13.9295	Down
ESYT1	-1.66021	5.529	-6.82454	1.8978e-09	1.47273e-08	11.1811	Down
MCOLN2	-1.6597	2.94407	-5.93583	8.23408e-08	4.13313e-07	7.49102	Down
TLE2	-1.65901	1.52097	-8.51647	1.15105e-12	2.57824e-11	18.4665	Down
KDM2B	-1.65617	2.96679	-7.54881	8.12885e-11	9.52542e-10	14.2756	Down
ZNF529	-1.65572	2.24574	-9.86129	3.1336e-15	1.76383e-13	24.2883	Down
MORN3	-1.6549	1.42999	-10.4723	2.2098e-16	2.07013e-14	26.9027	Down
CD74	-1.65257	8.93471	-5.06289	2.81603e-06	1.00693e-05	4.05559	Down
ZKSCAN8	-1.65217	3.65967	-8.2599	3.56677e-12	6.77247e-11	17.3525	Down
CD7	-1.65082	5.17993	-5.86321	1.11304e-07	5.40764e-07	7.19689	Down
TOX	-1.64871	2.46197	-8.31584	2.78746e-12	5.48944e-11	17.5953	Down
ANKRD36B	-1.64691	2.56702	-8.22019	4.24888e-12	7.78854e-11	17.1801	Down
ADAT2	-1.64567	2.02461	-8.19375	4.7739e-12	8.50276e-11	17.0654	Down
ZNF248	-1.64492	1.90751	-9.69819	6.38767e-15	3.19497e-13	23.5862	Down
OSBPL3	-1.64455	3.22772	-7.19198	3.86175e-10	3.6704e-09	12.7441	Down
ZNF551	-1.64334	2.03926	-9.60763	9.49204e-15	4.47075e-13	23.1956	Down
JMY	-1.64083	2.85055	-8.19429	4.76259e-12	8.49153e-11	17.0677	Down
CFAP97	-1.63806	2.86708	-8.21927	4.26611e-12	7.80326e-11	17.1762	Down
CPA3	-1.63651	1.71283	-5.61662	3.06858e-07	1.34516e-06	6.20842	Down
PAIP2B	-1.63614	1.43724	-10.8835	3.77219e-17	4.53626e-15	28.6452	Down
ZNF253	-1.63571	2.40474	-9.60944	9.41703e-15	4.44778e-13	23.2035	Down
SMAD3	-1.63562	3.94298	-7.1714	4.22359e-10	3.9654e-09	12.6561	Down
POLR1E	-1.63554	3.077	-7.69138	4.35074e-11	5.64863e-10	14.8904	Down
PLCXD2	-1.63529	2.55329	-8.1408	6.02806e-12	1.04085e-10	16.8357	Down
LPIN1	-1.63514	3.13992	-7.34797	1.95649e-10	2.03398e-09	13.4122	Down
RPS4X	-1.63472	8.13267	-5.62091	3.0154e-07	1.32459e-06	6.22545	Down
ZFP14	-1.6341	2.1979	-9.756	4.96163e-15	2.59659e-13	23.8352	Down
WNT10B	-1.63386	1.668	-6.61273	4.71635e-09	3.2548e-08	10.2885	Down
S1PR1	-1.6329	5.0302	-6.99345	9.1451e-10	7.79895e-09	11.8975	Down
TSHZ1	-1.63208	2.8984	-8.63097	6.9484e-13	1.65706e-11	18.9638	Down
TBC1D9	-1.63098	3.59179	-5.69975	2.18371e-07	9.89762e-07	6.53979	Down
RSAD1	-1.62997	3.69677	-5.95173	7.70699e-08	3.89739e-07	7.5556	Down
AFF3	-1.62823	1.95971	-7.01502	8.32903e-10	7.19811e-09	11.9893	Down
SAMD10	-1.62807	2.28783	-6.5404	6.42645e-09	4.28713e-08	9.98539	Down
ZBTB40	-1.62748	4.00749	-7.34984	1.94057e-10	2.01991e-09	13.4202	Down
ZFP62	-1.62687	3.45964	-8.2501	3.72419e-12	7.01637e-11	17.3099	Down
FHIT	-1.62552	1.60786	-7.44133	1.30115e-10	1.42429e-09	13.8131	Down
PCSK7	-1.62384	4.1269	-7.54301	8.3382e-11	9.71701e-10	14.2506	Down
RPL10	-1.62343	8.11929	-5.16554	1.88028e-06	6.99474e-06	4.44694	Down
PEBP1	-1.62326	5.37843	-5.76301	1.68367e-07	7.8408e-07	6.79324	Down
SIT1	-1.62283	4.52137	-5.19467	1.67562e-06	6.28996e-06	4.55867	Down
SLFN12L	-1.62257	2.10033	-8.85961	2.53709e-13	6.91622e-12	19.9566	Down
ZNHIT6	-1.6224	2.59274	-7.84671	2.19918e-11	3.19806e-10	15.5617	Down
DGKE	-1.62051	2.43411	-7.88495	1.85889e-11	2.7576e-10	15.7271	Down
CXCL5	-1.62041	3.17263	-4.49544	2.45533e-05	7.28735e-05	1.96645	Down
ALS2CL	-1.62018	1.55784	-7.25034	2.99515e-10	2.94752e-09	12.9937	Down
PRKX	-1.61994	4.08414	-6.88942	1.4343e-09	1.15479e-08	11.4558	Down
SLC25A45	-1.61932	3.21333	-7.24753	3.03201e-10	2.97861e-09	12.9817	Down
RPLP2	-1.61923	8.89994	-5.68162	2.35227e-07	1.05712e-06	6.46734	Down
RPL10A	-1.61892	8.21576	-4.70397	1.1236e-05	3.55575e-05	2.71866	Down
PKD1	-1.61845	2.95507	-6.66396	3.78639e-09	2.68515e-08	10.5038	Down
HSD17B8	-1.61825	2.65114	-6.66709	3.73595e-09	2.65271e-08	10.5169	Down
OCIAD2	-1.61694	2.95714	-6.22985	2.40246e-08	1.38653e-07	8.6946	Down
UBAP1L	-1.61659	2.28267	-8.98302	1.47341e-13	4.4798e-12	20.4923	Down
RORC	-1.61635	1.18067	-10.6432	1.05807e-16	1.10292e-14	27.6287	Down
SPIB	-1.61569	2.03905	-6.7608	2.49748e-09	1.86552e-08	10.9118	Down
ZNF528	-1.61557	1.83739	-10.1865	7.61256e-16	5.56373e-14	25.6834	Down
KPNA5	-1.6138	2.09803	-9.72308	5.72917e-15	2.91723e-13	23.6934	Down
MRPS25	-1.61347	2.39925	-7.76828	3.10414e-11	4.2584e-10	15.2226	Down
ARHGEF9	-1.61243	1.79481	-10.6633	9.70314e-17	1.02829e-14	27.714	Down
RNF144A	-1.61184	3.40536	-8.33086	2.60883e-12	5.20417e-11	17.6605	Down
LSR	-1.61103	2.63629	-7.141	4.82064e-10	4.4517e-09	12.5262	Down
VPREB3	-1.61074	3.3543	-4.10273	0.000101838	0.000268423	0.604785	Down
ELP2	-1.60775	3.24888	-7.94238	1.44392e-11	2.21969e-10	15.9758	Down
STRBP	-1.60694	2.63245	-7.27004	2.74876e-10	2.74326e-09	13.0781	Down
RPAIN	-1.60652	3.25738	-7.24479	3.06847e-10	3.00571e-09	12.97	Down
ZNF395	-1.60609	2.99682	-6.82708	1.87715e-09	1.46071e-08	11.1919	Down
ZNF138	-1.60582	2.74665	-9.42798	2.08528e-14	8.79554e-13	22.4197	Down
TCEA3	-1.6049	1.55308	-8.0628	8.49886e-12	1.40318e-10	16.4975	Down
CXXC5	-1.6045	3.5645	-6.234	2.36075e-08	1.36617e-07	8.71173	Down
JADE2	-1.60439	4.56389	-7.78835	2.8422e-11	3.97627e-10	15.3093	Down
AKT3	-1.60435	2.29998	-8.89194	2.20035e-13	6.15663e-12	20.097	Down
ZSCAN18	-1.60398	2.29149	-9.79359	4.21066e-15	2.28102e-13	23.997	Down
GZMB	-1.60267	6.12179	-3.96606	0.000164341	0.000417589	0.149191	Down
GOLGA7B	-1.60242	1.77396	-6.82254	1.91426e-09	1.48243e-08	11.1727	Down
HMGN3	-1.60236	4.48519	-4.05762	0.000119384	0.000311092	0.453296	Down
ITM2A	-1.60228	4.54998	-4.81233	7.43524e-06	2.43476e-05	3.11689	Down
NUCKS1	-1.6021	4.82106	-7.34093	2.01757e-10	2.08979e-09	13.382	Down
RIC3	-1.60113	1.8435	-8.55639	9.6532e-13	2.22089e-11	18.6399	Down
KIR2DL1	-1.60088	1.67521	-6.46318	8.93338e-09	5.7442e-08	9.66278	Down
LAT	-1.60077	1.58905	-7.97131	1.27135e-11	1.99048e-10	16.1011	Down
RNF157	-1.60001	2.67477	-6.80752	2.04231e-09	1.56904e-08	11.1091	Down
CACNA1I	-1.59931	1.90772	-7.17259	4.20184e-10	3.94997e-09	12.6612	Down
UBE2G2	-1.59917	4.53723	-6.5225	6.93699e-09	4.58929e-08	9.9105	Down
GIMAP7	-1.59816	6.24905	-4.35987	4.04293e-05	0.000115136	1.48795	Down
NAAA	-1.59715	4.34727	-6.07099	4.68431e-08	2.49536e-07	8.04188	Down
ACYP1	-1.59705	2.99011	-6.58589	5.29046e-09	3.60986e-08	10.176	Down
PEX3	-1.59644	2.42247	-9.05426	1.07689e-13	3.51826e-12	20.8013	Down
PPAN	-1.59609	2.15486	-7.72937	3.6825e-11	4.91271e-10	15.0545	Down
TAMM41	-1.59527	2.29447	-8.38545	2.05089e-12	4.27735e-11	17.8975	Down
PLEKHG4	-1.59519	1.53905	-8.27201	3.38142e-12	6.48589e-11	17.405	Down
RFXAP	-1.59383	2.84306	-8.0303	9.80637e-12	1.5851e-10	16.3566	Down
IGIP	-1.59331	2.46212	-8.20357	4.57168e-12	8.22902e-11	17.108	Down
TSPAN32	-1.59196	5.47326	-6.858	1.64274e-09	1.301e-08	11.3227	Down
ZNF880	-1.59174	1.84039	-10.3699	3.43936e-16	2.88702e-14	26.4666	Down
PNMA3	-1.59055	1.64445	-5.94455	7.94076e-08	3.99837e-07	7.52643	Down
USP53	-1.59021	1.93428	-11.2892	6.69808e-18	1.11346e-15	30.3484	Down
FBL	-1.58894	5.53184	-4.24364	6.1611e-05	0.000169278	1.08465	Down
C16orf74	-1.58865	2.27752	-8.21787	4.29257e-12	7.84319e-11	17.1701	Down
ARL10	-1.58848	1.84912	-8.95202	1.6889e-13	4.99772e-12	20.3577	Down
TPCN1	-1.58842	3.52198	-6.12705	3.70299e-08	2.02803e-07	8.2716	Down
DLG5	-1.58769	1.41032	-9.15598	6.88457e-14	2.40195e-12	21.2423	Down
ZNF737	-1.5875	2.55713	-8.8618	2.51272e-13	6.86081e-12	19.9662	Down
CYP4V2	-1.58722	2.67367	-8.20991	4.44582e-12	8.02804e-11	17.1355	Down
UST	-1.58679	1.67589	-10.2957	4.74191e-16	3.77483e-14	26.15	Down
ZNF69	-1.58626	1.56791	-11.6617	1.38961e-18	3.0208e-16	31.8976	Down
TNIK	-1.5858	3.56695	-7.75091	3.3501e-11	4.54434e-10	15.1476	Down
LMF1	-1.58563	2.21742	-9.35964	2.81423e-14	1.13076e-12	22.1242	Down
SERINC5	-1.58557	4.31163	-7.81529	2.52489e-11	3.59765e-10	15.4258	Down
DSC1	-1.58478	0.855087	-12.4827	4.57833e-20	1.76432e-17	35.2569	Down
POLR3E	-1.58354	3.20962	-7.30674	2.34215e-10	2.38951e-09	13.2354	Down
ACADSB	-1.58293	2.83553	-8.56784	9.17797e-13	2.12308e-11	18.6896	Down
CHST12	-1.58237	2.85314	-6.95107	1.09872e-09	9.13232e-09	11.7174	Down
MSANTD2	-1.58214	2.56379	-8.10385	7.09355e-12	1.20158e-10	16.6755	Down
KCNA3	-1.58098	2.98488	-7.11724	5.34493e-10	4.86466e-09	12.4248	Down
DUSP2	-1.58087	4.75846	-3.18053	0.00213063	0.00444243	-2.25949	Down
WDR75	-1.58044	3.56276	-6.96429	1.03761e-09	8.70976e-09	11.7736	Down
PSMG4	-1.58039	2.15689	-9.57559	1.0921e-14	5.05949e-13	23.0574	Down
SLC29A2	-1.58006	1.88113	-7.8357	2.30822e-11	3.33944e-10	15.5141	Down
IDUA	-1.57982	3.2487	-5.81451	1.36146e-07	6.47725e-07	7.00037	Down
SH2D3A	-1.5789	2.63332	-7.93314	1.50387e-11	2.29519e-10	15.9357	Down
TMEM181	-1.57889	4.45532	-7.4708	1.14378e-10	1.27257e-09	13.9399	Down
MBLAC2	-1.57863	1.77109	-10.5512	1.57251e-16	1.56031e-14	27.2381	Down
ZNF266	-1.57789	4.37633	-7.11494	5.39858e-10	4.91085e-09	12.415	Down
SUN1	-1.57735	3.13883	-6.67149	3.66598e-09	2.6074e-08	10.5355	Down
GIMAP1	-1.5758	4.3609	-6.30043	1.78294e-08	1.06599e-07	8.98634	Down
TRIM32	-1.57544	2.27575	-8.54127	1.03184e-12	2.35793e-11	18.5742	Down
CYP2S1	-1.57462	1.48594	-6.96324	1.04232e-09	8.7389e-09	11.7691	Down
PATZ1	-1.57401	3.60828	-7.96871	1.28596e-11	2.00595e-10	16.0898	Down
PLXND1	-1.57226	3.86891	-5.22173	1.50516e-06	5.70951e-06	4.66273	Down
ZNF595	-1.57223	1.86167	-11.669	1.34734e-18	3.00387e-16	31.928	Down
MPEG1	-1.57215	7.25376	-4.52974	2.16172e-05	6.47704e-05	2.08883	Down
NDRG2	-1.571	1.2958	-10.0825	1.19583e-15	7.98286e-14	25.2381	Down
TP53I13	-1.57024	3.52778	-5.5728	3.6687e-07	1.57925e-06	6.03453	Down
NIPAL3	-1.56975	3.41907	-8.35148	2.38224e-12	4.84913e-11	17.75	Down
CLSTN1	-1.56942	4.91324	-5.7107	2.08776e-07	9.50592e-07	6.58358	Down
XPO4	-1.56862	3.04088	-7.83329	2.33285e-11	3.36074e-10	15.5036	Down
TRIM44	-1.56849	3.84917	-6.58042	5.4157e-09	3.68494e-08	10.153	Down
TRAP1	-1.56845	3.37173	-6.62218	4.52916e-09	3.14096e-08	10.3282	Down
C3orf18	-1.56816	2.28741	-7.44826	1.2623e-10	1.38534e-09	13.8429	Down
PDGFD	-1.56757	1.91112	-8.05812	8.67608e-12	1.42966e-10	16.4772	Down
ABHD15	-1.56634	3.43593	-7.51784	9.30964e-11	1.06545e-09	14.1423	Down
WDR89	-1.56614	2.68256	-7.61102	6.18931e-11	7.51762e-10	14.5437	Down
PIK3C2B	-1.56561	2.59111	-7.13713	4.90234e-10	4.51026e-09	12.5097	Down
TMEM263	-1.56547	3.04546	-6.55977	5.91589e-09	3.98688e-08	10.0665	Down
MRM1	-1.56382	2.75506	-7.74874	3.38227e-11	4.57699e-10	15.1381	Down
IL21R	-1.56342	3.45209	-7.41061	1.48813e-10	1.60412e-09	13.6811	Down
NLE1	-1.56208	2.01229	-9.29342	3.76359e-14	1.44379e-12	21.8376	Down
CRIP1	-1.56157	2.74832	-6.93021	1.20245e-09	9.90228e-09	11.6289	Down
MYBBP1A	-1.56102	3.3581	-6.36347	1.36497e-08	8.35838e-08	9.24775	Down
HABP4	-1.56099	2.4469	-6.99488	9.08879e-10	7.77308e-09	11.9036	Down
TCERG1	-1.55923	3.61286	-7.03192	7.74075e-10	6.74125e-09	12.0612	Down
ENO2	-1.55891	3.35908	-5.5859	3.47816e-07	1.50602e-06	6.08644	Down
ABHD14B	-1.55845	3.85684	-6.60976	4.77666e-09	3.29374e-08	10.2761	Down
SLC25A42	-1.55834	3.21215	-6.62517	4.47149e-09	3.10859e-08	10.3408	Down
PCED1A	-1.55821	4.85223	-5.41349	6.99236e-07	2.83371e-06	5.40718	Down
LRIG1	-1.55725	2.96232	-7.91669	1.61667e-11	2.44971e-10	15.8645	Down
POLRMT	-1.55709	3.83984	-5.95217	7.69274e-08	3.8922e-07	7.55741	Down
RPL36	-1.55473	6.27958	-3.36406	0.00120737	0.0026186	-1.73103	Down
ZFP90	-1.55446	3.23257	-8.48407	1.32778e-12	2.90128e-11	18.3258	Down
L3HYPDH	-1.5539	2.7975	-7.80757	2.61203e-11	3.70004e-10	15.3924	Down
PBX4	-1.55375	2.79872	-7.54038	8.43484e-11	9.80269e-10	14.2393	Down
DENND2D	-1.55238	5.46671	-8.25484	3.64723e-12	6.9175e-11	17.3305	Down
ZNF302	-1.55034	3.21529	-7.74336	3.46306e-11	4.66927e-10	15.1149	Down
SMYD4	-1.55008	2.74688	-8.00312	1.10529e-11	1.7614e-10	16.2388	Down
RUFY3	-1.5479	2.96938	-7.09417	5.90847e-10	5.30917e-09	12.3264	Down
USP11	-1.54704	3.64809	-6.90557	1.33766e-09	1.08629e-08	11.5243	Down
FITM2	-1.54621	1.97541	-9.71673	5.89048e-15	2.96377e-13	23.666	Down
OSBPL7	-1.5451	2.87494	-5.50591	4.81387e-07	2.0184e-06	5.77018	Down
SLC18B1	-1.54451	3.3002	-7.00451	8.71721e-10	7.48022e-09	11.9446	Down
PI16	-1.54436	1.56015	-7.67227	4.73127e-11	6.06375e-10	14.8079	Down
SYNGAP1	-1.54426	3.19821	-5.39353	7.57708e-07	3.04592e-06	5.32913	Down
P2RY11	-1.54341	2.6272	-7.87516	1.94061e-11	2.86879e-10	15.6848	Down
CCDC102A	-1.54332	2.40934	-7.03223	7.73046e-10	6.73575e-09	12.0625	Down
PITPNC1	-1.54318	3.88431	-8.8317	2.86898e-13	7.68506e-12	19.8355	Down
MAP3K14	-1.54306	3.99336	-7.07325	6.47003e-10	5.74978e-09	12.2372	Down
NUP210	-1.54274	4.94629	-6.00298	6.22486e-08	3.21893e-07	7.76414	Down
FAM153A	-1.5426	1.29095	-7.39721	1.57791e-10	1.68377e-09	13.6235	Down
ALKBH8	-1.54228	2.22206	-8.72707	4.54933e-13	1.15823e-11	19.3812	Down
THOC1	-1.5412	2.77843	-7.51506	9.42381e-11	1.07314e-09	14.1303	Down
GIPC1	-1.54068	2.63897	-7.07719	6.36049e-10	5.66431e-09	12.254	Down
CR2	-1.54006	1.82811	-6.50234	7.56013e-09	4.95898e-08	9.82624	Down
LFNG	-1.53889	5.8002	-5.65352	2.63912e-07	1.17175e-06	6.35525	Down
SNRPA1	-1.53862	4.08575	-5.40722	7.17096e-07	2.90054e-06	5.38266	Down
ZNF683	-1.53851	2.20752	-4.23021	6.46582e-05	0.000177058	1.03849	Down
ZNF461	-1.53745	1.66189	-10.5359	1.67958e-16	1.64619e-14	27.1732	Down
SEMA4F	-1.53715	1.76297	-9.34141	3.0487e-14	1.20512e-12	22.0453	Down
LAX1	-1.53712	3.78225	-5.66028	2.56711e-07	1.14247e-06	6.3822	Down
ZXDA	-1.53687	1.93094	-9.30227	3.62028e-14	1.40416e-12	21.8759	Down
N6AMT1	-1.53677	1.84961	-10.0865	1.17525e-15	7.90779e-14	25.2552	Down
TUBGCP5	-1.53645	2.15739	-8.74541	4.19612e-13	1.07476e-11	19.4608	Down
RPL18A	-1.53521	7.64978	-5.2858	1.16646e-06	4.51459e-06	4.91011	Down
ODF2L	-1.53476	3.05165	-8.68645	5.44116e-13	1.34294e-11	19.2048	Down
FPGS	-1.5344	3.93649	-6.84834	1.71268e-09	1.34945e-08	11.2818	Down
CAPN5	-1.53406	1.43014	-10.7985	5.42974e-17	6.08966e-15	28.2863	Down
MS4A2	-1.53396	1.02104	-7.80063	2.69291e-11	3.80191e-10	15.3624	Down
PTGDS	-1.5337	2.66674	-4.35833	4.06582e-05	0.000115671	1.48253	Down
TMC8	-1.533	6.35956	-5.68143	2.35404e-07	1.05735e-06	6.46661	Down
PURA	-1.53282	2.93456	-7.93251	1.50799e-11	2.29942e-10	15.933	Down
ZNF853	-1.5326	1.45146	-9.40862	2.27002e-14	9.40203e-13	22.336	Down
NOP14	-1.53248	3.94153	-6.32302	1.62029e-08	9.77707e-08	9.07994	Down
ZMYND11	-1.53165	2.73844	-7.6327	5.62811e-11	7.01024e-10	14.6372	Down
HEATR1	-1.53161	3.30739	-7.42045	1.42551e-10	1.54447e-09	13.7234	Down
RAB11FIP3	-1.53149	3.06628	-6.86076	1.62326e-09	1.28798e-08	11.3344	Down
COQ10A	-1.5314	2.22619	-6.26441	2.07625e-08	1.21985e-07	8.83734	Down
ATP10A	-1.53108	2.19755	-7.86419	2.0365e-11	2.99748e-10	15.6373	Down
TNRC6C	-1.53099	3.65819	-9.26783	4.21126e-14	1.5868e-12	21.7268	Down
ZNF792	-1.53087	2.87276	-8.5214	1.1263e-12	2.53619e-11	18.4879	Down
PCYOX1L	-1.52954	3.06309	-7.37458	1.74184e-10	1.83559e-09	13.5264	Down
SFMBT2	-1.52929	3.00789	-7.29083	2.51048e-10	2.53078e-09	13.1672	Down
ECI2	-1.52882	2.77466	-7.31318	2.27731e-10	2.33036e-09	13.263	Down
NPAT	-1.52824	3.75765	-7.29544	2.46057e-10	2.49255e-09	13.1869	Down
HRH4	-1.52756	1.30983	-9.35421	2.88213e-14	1.14987e-12	22.1007	Down
CCDC136	-1.52755	1.43653	-9.0222	1.24007e-13	3.94495e-12	20.6622	Down
COL5A3	-1.52731	0.815843	-8.17499	5.18518e-12	9.11087e-11	16.984	Down
ZNF780B	-1.52659	3.01783	-7.04363	7.35762e-10	6.454e-09	12.111	Down
DCAF17	-1.52614	2.69813	-8.25148	3.70173e-12	6.98959e-11	17.3159	Down
DNHD1	-1.52571	2.31623	-7.64977	5.22208e-11	6.59312e-10	14.7109	Down
ANGEL1	-1.52565	2.7819	-7.58466	6.94733e-11	8.3309e-10	14.4301	Down
ZNF514	-1.52492	2.11916	-8.44306	1.5909e-12	3.42326e-11	18.1477	Down
CD81	-1.5249	4.06207	-6.34523	1.47477e-08	8.96603e-08	9.17202	Down
HOXB2	-1.52459	2.62225	-6.78573	2.24328e-09	1.70137e-08	11.0171	Down
LPAR5	-1.5244	3.29001	-6.91452	1.28687e-09	1.05259e-08	11.5623	Down
SMARCAD1	-1.52121	3.04472	-7.32919	2.12365e-10	2.18898e-09	13.3316	Down
SUMF2	-1.52068	4.69282	-6.18117	2.94942e-08	1.66037e-07	8.49403	Down
SLC16A10	-1.52026	0.887796	-13.4612	8.69789e-22	8.19341e-19	39.1528	Down
OLFM2	-1.51998	1.65628	-9.8102	3.91618e-15	2.14202e-13	24.0685	Down
FBXO21	-1.51989	2.94505	-8.17643	5.15254e-12	9.08027e-11	16.9902	Down
NOL9	-1.51833	3.38414	-7.35032	1.93651e-10	2.01692e-09	13.4223	Down
AQP3	-1.51815	4.39533	-4.62183	1.53194e-05	4.7254e-05	2.42007	Down
SRSF8	-1.51785	4.22646	-6.63716	4.24761e-09	2.96389e-08	10.3911	Down
GPR162	-1.51759	2.38557	-5.1277	2.18308e-06	8.02261e-06	4.30221	Down
MPHOSPH9	-1.51695	2.95073	-7.47244	1.13561e-10	1.26514e-09	13.9469	Down
USP28	-1.51687	3.81523	-6.61068	4.75779e-09	3.28206e-08	10.28	Down
WWP1	-1.51672	4.13197	-8.36769	2.21793e-12	4.56963e-11	17.8204	Down
SACS	-1.51669	2.0801	-9.06048	1.04782e-13	3.43651e-12	20.8282	Down
PHOSPHO2	-1.51647	1.57734	-11.1187	1.38238e-17	1.86029e-15	29.6345	Down
RRAS2	-1.51591	2.9173	-6.47308	8.56462e-09	5.54917e-08	9.70406	Down
FUOM	-1.51546	2.99168	-7.20788	3.60353e-10	3.45988e-09	12.8121	Down
ARL14EP	-1.51515	2.84698	-7.34889	1.94868e-10	2.02711e-09	13.4161	Down
IGSF9B	-1.51512	1.61756	-7.322	2.19137e-10	2.25329e-09	13.3008	Down
RPS28	-1.5137	6.89406	-3.86643	0.000231618	0.000573079	-0.176575	Down
CYP2U1	-1.51297	1.54942	-10.5368	1.67297e-16	1.64619e-14	27.1771	Down
TFDP2	-1.51215	2.99222	-8.78722	3.49009e-13	9.10431e-12	19.6424	Down
STARD9	-1.51102	1.43182	-10.0705	1.25999e-15	8.24891e-14	25.1866	Down
RRP1B	-1.51098	3.78635	-6.95239	1.09245e-09	9.09355e-09	11.723	Down
MLH3	-1.50995	2.85978	-7.5259	8.98683e-11	1.03661e-09	14.177	Down
AEBP1	-1.50965	1.6577	-6.65423	3.94778e-09	2.7851e-08	10.4629	Down
DCHS1	-1.50934	1.52631	-8.50181	1.22789e-12	2.71095e-11	18.4028	Down
PPM1K	-1.50929	3.63796	-6.14532	3.4295e-08	1.89663e-07	8.3466	Down
AGAP1	-1.50806	1.12025	-9.82189	3.7213e-15	2.04202e-13	24.1189	Down
ERI3	-1.50784	3.4301	-7.43913	1.31373e-10	1.43436e-09	13.8037	Down
ULK2	-1.50778	2.19712	-8.18158	5.03692e-12	8.90574e-11	17.0126	Down
BTLA	-1.50777	3.45953	-6.00238	6.24033e-08	3.22496e-07	7.76172	Down
GALT	-1.50695	3.42182	-6.7246	2.91825e-09	2.13284e-08	10.7591	Down
CHMP7	-1.50613	5.15195	-7.78913	2.83244e-11	3.96589e-10	15.3127	Down
ST3GAL5	-1.50528	2.43237	-7.3975	1.5759e-10	1.68268e-09	13.6248	Down
DPH1	-1.50516	2.55872	-6.89454	1.40296e-09	1.13225e-08	11.4775	Down
KMT2A	-1.50459	3.47307	-7.61337	6.12575e-11	7.4618e-10	14.5539	Down
OSGEPL1	-1.5033	1.84113	-8.75812	3.96746e-13	1.02393e-11	19.516	Down
ZNF549	-1.50308	1.60984	-10.1628	8.43788e-16	6.01146e-14	25.5819	Down
ZNF860	-1.50271	1.45602	-7.59064	6.76758e-11	8.14994e-10	14.4559	Down
POLR3D	-1.5026	3.02463	-6.87534	1.52422e-09	1.21679e-08	11.3962	Down
ZNF30	-1.50213	1.38518	-10.1318	9.65314e-16	6.6536e-14	25.4492	Down
TMEM134	-1.50175	2.50089	-7.55451	7.92847e-11	9.30991e-10	14.3002	Down
DDX31	-1.50068	2.14806	-8.82795	2.91676e-13	7.7518e-12	19.8192	Down
LANCL1	-1.50029	2.72224	-7.64923	5.23446e-11	6.59893e-10	14.7085	Down
HSF2	-1.50019	2.96259	-7.55749	7.82565e-11	9.21471e-10	14.313	Down
TSNARE1	-1.4991	2.86591	-7.44415	1.2852e-10	1.40956e-09	13.8253	Down
SPIN2B	-1.49749	2.12355	-7.24214	3.10409e-10	3.03186e-09	12.9586	Down
BEX2	-1.49655	2.21964	-3.94266	0.000178215	0.00045021	0.0721786	Down
ZNF749	-1.49654	1.54958	-10.3996	3.02574e-16	2.631e-14	26.593	Down
EEF2K	-1.49642	2.60081	-7.83488	2.31659e-11	3.34447e-10	15.5105	Down
IVD	-1.49573	3.48892	-7.31781	2.23173e-10	2.29201e-09	13.2828	Down
SHPRH	-1.49554	2.5259	-8.55024	9.91865e-13	2.27545e-11	18.6132	Down
PTCD3	-1.49517	3.54042	-7.10406	5.65989e-10	5.11562e-09	12.3686	Down
GPR171	-1.49507	3.81109	-5.75544	1.73694e-07	8.05483e-07	6.76288	Down
ENG	-1.49473	2.87527	-6.46022	9.0469e-09	5.81058e-08	9.65041	Down
FBXO31	-1.49445	2.68317	-8.07703	7.98273e-12	1.32831e-10	16.5592	Down
GABPB2	-1.49407	3.22196	-8.40644	1.86962e-12	3.94785e-11	17.9887	Down
MEGF6	-1.49362	3.49678	-6.52148	6.96716e-09	4.60566e-08	9.90625	Down
SUPT3H	-1.49356	1.8692	-9.24505	4.65463e-14	1.71201e-12	21.6281	Down
ZNF32	-1.49337	3.50094	-5.60583	3.2067e-07	1.39848e-06	6.16556	Down
ZNF506	-1.49241	3.47469	-7.61661	6.03936e-11	7.38308e-10	14.5678	Down
RALGDS	-1.4923	2.71541	-7.07629	6.38539e-10	5.68051e-09	12.2502	Down
AKAP1	-1.49126	2.83542	-7.06825	6.61221e-10	5.86691e-09	12.2159	Down
NPTXR	-1.49083	1.33378	-9.68407	6.7942e-15	3.36849e-13	23.5253	Down
GLOD4	-1.49029	3.60122	-6.22248	2.47831e-08	1.42496e-07	8.66421	Down
TRMT61B	-1.49014	3.12812	-7.64657	5.29599e-11	6.66658e-10	14.697	Down
RPS23	-1.48953	7.17271	-3.32239	0.00137596	0.00295363	-1.85298	Down
NCAM1	-1.48839	1.57888	-7.52412	9.05727e-11	1.04189e-09	14.1693	Down
FNBP4	-1.48814	4.87748	-7.09633	5.85333e-10	5.2652e-09	12.3356	Down
FAM3C	-1.48772	3.44394	-5.52923	4.37956e-07	1.85464e-06	5.86217	Down
TMEM177	-1.48703	1.69404	-9.30696	3.54645e-14	1.38238e-12	21.8962	Down
AGMAT	-1.48618	1.92758	-7.59065	6.76739e-11	8.14994e-10	14.4559	Down
DIS3L2	-1.48612	2.51226	-8.70507	5.01235e-13	1.25724e-11	19.2856	Down
COX11	-1.48583	2.89311	-7.98718	1.18559e-11	1.87352e-10	16.1698	Down
ACTR5	-1.48442	3.24405	-6.6691	3.70373e-09	2.63314e-08	10.5254	Down
CACNA2D3	-1.48349	0.955202	-11.1348	1.29056e-17	1.77909e-15	29.7022	Down
KIF3A	-1.48314	1.85913	-9.30131	3.63544e-14	1.40416e-12	21.8717	Down
B3GAT1	-1.48177	2.03547	-5.58554	3.48328e-07	1.50743e-06	6.08501	Down
SSBP3	-1.48115	4.07644	-6.91257	1.29775e-09	1.05995e-08	11.554	Down
COQ4	-1.48103	3.18874	-6.95401	1.08481e-09	9.0477e-09	11.7299	Down
TMEM42	-1.48057	2.70064	-7.8897	1.82048e-11	2.71011e-10	15.7477	Down
CCDC14	-1.47937	2.85317	-7.20363	3.67091e-10	3.51859e-09	12.7939	Down
HIVEP3	-1.47922	2.27435	-7.70772	4.04959e-11	5.34357e-10	14.961	Down
GGA2	-1.4784	4.49092	-5.58067	3.55301e-07	1.53334e-06	6.06572	Down
PEA15	-1.47838	4.72443	-5.46768	5.61943e-07	2.32115e-06	5.61969	Down
RPTOR	-1.47808	3.24538	-7.12538	5.15932e-10	4.71852e-09	12.4595	Down
TBC1D19	-1.47699	1.58506	-9.13807	7.44879e-14	2.57233e-12	21.1646	Down
ST6GAL1	-1.47665	4.87108	-6.75617	2.5477e-09	1.89885e-08	10.8923	Down
SLC9A7	-1.47489	2.19721	-8.24565	3.79805e-12	7.13175e-11	17.2906	Down
TMEM243	-1.47382	3.80448	-7.08687	6.09876e-10	5.46279e-09	12.2953	Down
IL23A	-1.47357	1.82232	-6.27446	1.98992e-08	1.17565e-07	8.87889	Down
PLXNA3	-1.47357	2.47183	-5.66526	2.5153e-07	1.12235e-06	6.40206	Down
ZNF234	-1.47342	2.27664	-8.12434	6.48145e-12	1.11009e-10	16.7643	Down
ACCS	-1.47289	3.59923	-4.1345	9.10028e-05	0.000242426	0.712078	Down
SULF2	-1.47272	4.6272	-3.50727	0.000764742	0.00171566	-1.30356	Down
NEMP1	-1.47271	3.02658	-7.21608	3.47723e-10	3.35572e-09	12.8471	Down
VIPR1	-1.47218	2.95249	-7.258	2.89678e-10	2.86903e-09	13.0265	Down
CA11	-1.47115	2.00393	-4.97658	3.94428e-06	1.37301e-05	3.72949	Down
FBXO25	-1.471	2.10593	-9.61294	9.27402e-15	4.39247e-13	23.2186	Down
POLR3H	-1.46997	2.72153	-7.78936	2.82959e-11	3.96517e-10	15.3137	Down
MTA1	-1.46964	3.63161	-6.38835	1.22816e-08	7.61972e-08	9.35113	Down
ZNF226	-1.46873	2.65016	-7.96456	1.30968e-11	2.0392e-10	16.0718	Down
FAHD2A	-1.46803	2.35895	-8.09669	7.32068e-12	1.23155e-10	16.6444	Down
RRP15	-1.46773	1.77493	-8.87543	2.36634e-13	6.51358e-12	20.0253	Down
FRA10AC1	-1.46717	2.6676	-8.27167	3.38658e-12	6.48846e-11	17.4035	Down
SIGLEC6	-1.46708	1.28134	-9.35141	2.91776e-14	1.16135e-12	22.0885	Down
FBXL16	-1.46688	1.7542	-7.9065	1.69078e-11	2.54835e-10	15.8204	Down
RPL13A	-1.46685	9.03024	-4.39223	3.59187e-05	0.000103209	1.60135	Down
CD19	-1.46677	3.32785	-4.31488	4.76244e-05	0.000133828	1.33104	Down
XPA	-1.46614	3.68844	-7.66989	4.78086e-11	6.12224e-10	14.7977	Down
GSE1	-1.46594	3.59934	-7.06787	6.62303e-10	5.87344e-09	12.2143	Down
NRCAM	-1.46593	0.606222	-15.3486	5.83922e-25	1.41443e-21	46.3141	Down
STK39	-1.46572	3.66536	-7.12051	5.26968e-10	4.8039e-09	12.4388	Down
ZNF460	-1.46567	4.05648	-4.879	5.75486e-06	1.93341e-05	3.36429	Down
GPR15	-1.46552	2.27755	-5.5725	3.67319e-07	1.58038e-06	6.03334	Down
ZNF891	-1.4655	1.73065	-10.241	6.01064e-16	4.60555e-14	25.9163	Down
PPIH	-1.46538	2.78268	-6.73839	2.75031e-09	2.02934e-08	10.8172	Down
ERMARD	-1.46529	3.2863	-7.6396	5.46037e-11	6.83292e-10	14.667	Down
PRKCA	-1.4652	3.49703	-7.84523	2.21358e-11	3.21073e-10	15.5553	Down
FBLN2	-1.46393	0.837215	-11.0672	1.72134e-17	2.24516e-15	29.4184	Down
FAM118A	-1.46306	3.6639	-4.94481	4.4621e-06	1.53374e-05	3.61019	Down
RNASEH2B	-1.46283	2.51034	-8.11446	6.76978e-12	1.15249e-10	16.7215	Down
SMPD3	-1.46271	1.62388	-6.19299	2.80623e-08	1.58714e-07	8.54269	Down
DNAJC24	-1.46269	2.02615	-9.45357	1.86395e-14	8.00936e-13	22.5303	Down
CHD3	-1.46244	5.4046	-5.82697	1.2931e-07	6.19023e-07	7.05062	Down
SLC25A38	-1.46233	4.27431	-6.92489	1.23045e-09	1.01132e-08	11.6063	Down
ATIC	-1.46224	3.81648	-6.11481	3.89828e-08	2.12333e-07	8.22137	Down
MDN1	-1.46158	2.83842	-7.78149	2.92906e-11	4.07091e-10	15.2797	Down
GPRIN3	-1.4615	3.85596	-6.1371	3.55002e-08	1.95372e-07	8.31284	Down
SFXN2	-1.46005	1.68308	-9.42939	2.07245e-14	8.7632e-13	22.4258	Down
APEX1	-1.45946	5.36994	-4.86868	5.98827e-06	2.00508e-05	3.32588	Down
ZNF675	-1.45904	2.00496	-9.54994	1.2219e-14	5.51026e-13	22.9467	Down
BCKDHB	-1.4586	1.98584	-8.99138	1.42021e-13	4.37836e-12	20.5285	Down
SLC5A3	-1.4582	3.48122	-6.137	3.55142e-08	1.95386e-07	8.31245	Down
NOP58	-1.45817	4.47527	-5.24475	1.37362e-06	5.2481e-06	4.75145	Down
ILF3	-1.45787	5.20176	-6.03079	5.54217e-08	2.90399e-07	7.8776	Down
ZBTB39	-1.45783	2.37953	-7.74933	3.37352e-11	4.5688e-10	15.1407	Down
GSDMB	-1.45765	3.94679	-5.78673	1.52688e-07	7.16376e-07	6.88855	Down
WDR4	-1.4574	2.97286	-7.0077	8.59762e-10	7.39256e-09	11.9581	Down
ZNF678	-1.45694	1.86114	-9.83697	3.48441e-15	1.92448e-13	24.1837	Down
SDAD1	-1.45638	3.8578	-6.4682	8.7447e-09	5.64213e-08	9.68368	Down
FGFRL1	-1.45565	2.1705	-6.73919	2.74084e-09	2.02324e-08	10.8206	Down
SYNCRIP	-1.4554	3.54624	-7.5468	8.20082e-11	9.58326e-10	14.267	Down
KCTD7	-1.45531	3.52112	-7.79873	2.71543e-11	3.82415e-10	15.3542	Down
WDR27	-1.45504	1.98641	-9.00105	1.361e-13	4.22658e-12	20.5705	Down
CBX5	-1.45503	3.45923	-6.91715	1.27231e-09	1.04219e-08	11.5734	Down
HNRNPA1	-1.45493	6.95721	-4.2473	6.08042e-05	0.000167342	1.09725	Down
P4HTM	-1.45481	2.92242	-7.85666	2.10508e-11	3.08769e-10	15.6047	Down
CYB561	-1.45464	2.81836	-5.69878	2.19243e-07	9.93181e-07	6.53591	Down
PIEZO1	-1.45411	4.89397	-5.2912	1.14161e-06	4.42953e-06	4.93101	Down
CD200R1	-1.45397	2.40056	-8.03186	9.73911e-12	1.57573e-10	16.3634	Down
RFX7	-1.45397	2.89346	-8.17626	5.15641e-12	9.08027e-11	16.9895	Down
ERBB2	-1.45386	1.50487	-8.21338	4.37828e-12	7.94841e-11	17.1506	Down
SLC16A7	-1.45353	3.12384	-7.15084	4.6187e-10	4.27715e-09	12.5683	Down
SLFN5	-1.45333	5.32991	-4.95609	4.27113e-06	1.47708e-05	3.65249	Down
CCR5	-1.45318	3.68283	-4.97202	4.0148e-06	1.39493e-05	3.71235	Down
RPS5	-1.45313	6.75104	-4.98915	3.75594e-06	1.31149e-05	3.77682	Down
SCRN1	-1.45297	3.16593	-6.98793	9.36654e-10	7.93302e-09	11.874	Down
BMS1	-1.45153	3.01921	-6.87188	1.54717e-09	1.23337e-08	11.3815	Down
C17orf67	-1.45128	2.3188	-9.11269	8.3281e-14	2.82989e-12	21.0546	Down
PRMT7	-1.45055	2.25859	-8.25043	3.71879e-12	7.014e-11	17.3114	Down
TP53	-1.45015	3.95611	-6.77656	2.33365e-09	1.7599e-08	10.9783	Down
KRI1	-1.4501	4.00298	-4.96423	4.1382e-06	1.43403e-05	3.68307	Down
DCAF16	-1.449	4.27344	-7.62378	5.85254e-11	7.21189e-10	14.5988	Down
NOC3L	-1.44887	2.60097	-7.34397	1.99101e-10	2.0648e-09	13.395	Down
ZNF785	-1.4488	2.39756	-7.74823	3.38976e-11	4.58347e-10	15.136	Down
CARF	-1.44873	2.17298	-9.0436	1.1286e-13	3.64505e-12	20.755	Down
FN3KRP	-1.44835	3.38234	-5.61541	3.08386e-07	1.35081e-06	6.20359	Down
ZNF331	-1.44832	2.11195	-7.87396	1.95087e-11	2.87894e-10	15.6796	Down
LRBA	-1.44783	3.38985	-6.6513	3.99767e-09	2.81614e-08	10.4506	Down
RABL2A	-1.44779	2.46802	-8.29297	3.08304e-12	6.01566e-11	17.496	Down
CLNS1A	-1.44779	3.99154	-6.39189	1.20985e-08	7.51435e-08	9.36583	Down
OVGP1	-1.4475	1.47605	-7.38374	1.67355e-10	1.77465e-09	13.5657	Down
LGALS9B	-1.44735	1.31926	-6.45742	9.15555e-09	5.86924e-08	9.63872	Down
METTL16	-1.44722	2.89452	-8.20278	4.58765e-12	8.24901e-11	17.1046	Down
USP45	-1.44722	2.00563	-8.88632	2.25544e-13	6.26939e-12	20.0726	Down
ANKH	-1.44691	3.02851	-6.68405	3.47367e-09	2.48942e-08	10.5883	Down
ZCCHC18	-1.44647	1.30718	-7.85772	2.09534e-11	3.07606e-10	15.6093	Down
RALGAPA1	-1.44638	2.87195	-7.4688	1.15382e-10	1.28206e-09	13.9313	Down
TRMT2B	-1.44622	3.96748	-7.79955	2.70572e-11	3.81682e-10	15.3577	Down
RTN1	-1.44478	2.7239	-6.76054	2.50033e-09	1.86683e-08	10.9107	Down
SSBP4	-1.44453	4.96497	-5.22038	1.51329e-06	5.73776e-06	4.65751	Down
ZNF275	-1.44441	2.60238	-7.2426	3.09781e-10	3.02746e-09	12.9606	Down
ANKS6	-1.4444	1.44827	-9.55158	1.21315e-14	5.48538e-13	22.9538	Down
PAFAH2	-1.44377	3.62687	-8.7019	5.08288e-13	1.26743e-11	19.2719	Down
KIF21A	-1.44358	1.60603	-8.8508	2.63748e-13	7.14395e-12	19.9184	Down
RBMX	-1.44315	5.46373	-6.8793	1.49841e-09	1.19845e-08	11.4129	Down
GDF11	-1.44264	1.65853	-8.98247	1.47701e-13	4.48017e-12	20.4899	Down
MID2	-1.44166	1.14573	-11.2155	9.15891e-18	1.39278e-15	30.0401	Down
DGKA	-1.44159	5.08094	-6.22698	2.43171e-08	1.40102e-07	8.68277	Down
KCNC3	-1.4406	1.55134	-7.52549	9.00301e-11	1.03776e-09	14.1752	Down
FAAH	-1.44052	2.48221	-6.58071	5.4091e-09	3.68192e-08	10.1542	Down
NAA25	-1.44044	2.78112	-7.40028	1.55686e-10	1.66654e-09	13.6367	Down
ZNF74	-1.44036	1.65861	-8.7038	5.04048e-13	1.26243e-11	19.2801	Down
QTRT1	-1.44011	2.85873	-4.96925	4.05828e-06	1.40893e-05	3.70193	Down
DCTD	-1.44	3.99184	-6.29961	1.78914e-08	1.06857e-07	8.98294	Down
SLC41A1	-1.43998	2.61107	-6.61862	4.59871e-09	3.18398e-08	10.3133	Down
ZFP41	-1.43997	1.48689	-11.2577	7.65357e-18	1.23594e-15	30.217	Down
GTPBP6	-1.43987	4.64291	-5.80807	1.39817e-07	6.63143e-07	6.97442	Down
GCFC2	-1.43984	2.2506	-8.25395	3.66151e-12	6.93682e-11	17.3267	Down
ZNF525	-1.4398	1.84296	-8.92681	1.88714e-13	5.48857e-12	20.2483	Down
MSI2	-1.43898	2.95823	-8.37431	2.15416e-12	4.47075e-11	17.8491	Down
ANAPC1	-1.43857	2.56742	-8.15649	5.62556e-12	9.77325e-11	16.9038	Down
DDHD1	-1.43828	3.12175	-7.19467	3.81689e-10	3.63591e-09	12.7555	Down
CD72	-1.43788	3.05816	-4.88912	5.53471e-06	1.86796e-05	3.40197	Down
RPS2	-1.43784	8.92237	-5.23928	1.40384e-06	5.34911e-06	4.73033	Down
RECK	-1.43769	2.14579	-8.39124	1.99922e-12	4.19022e-11	17.9227	Down
FAN1	-1.43765	2.01194	-8.51449	1.16113e-12	2.59396e-11	18.4579	Down
ZNF70	-1.43688	1.6618	-10.0669	1.2801e-15	8.31624e-14	25.171	Down
TAS2R3	-1.43635	1.67693	-5.39679	7.4784e-07	3.01197e-06	5.34187	Down
VASH1	-1.43622	2.85704	-5.31428	1.04108e-06	4.07398e-06	5.02051	Down
TMEM109	-1.43522	5.15487	-5.58272	3.52343e-07	1.52251e-06	6.07385	Down
ZDHHC21	-1.43491	2.59638	-7.54827	8.14834e-11	9.53508e-10	14.2733	Down
SPNS3	-1.43416	2.29219	-6.12978	3.66081e-08	2.00611e-07	8.2828	Down
CAMK1	-1.43392	3.14031	-5.29488	1.12497e-06	4.37098e-06	4.94526	Down
CCDC66	-1.43212	2.74996	-8.53406	1.06518e-12	2.42432e-11	18.5429	Down
HVCN1	-1.43186	4.73756	-5.59342	3.37323e-07	1.46396e-06	6.11626	Down
HAUS5	-1.43151	2.51047	-5.92262	8.69881e-08	4.32762e-07	7.43743	Down
UBIAD1	-1.43115	3.07162	-7.97829	1.23292e-11	1.9339e-10	16.1313	Down
ZNF146	-1.43069	4.16462	-6.48159	8.25942e-09	5.36867e-08	9.7396	Down
PTPRS	-1.42933	0.914628	-13.4288	9.90082e-22	8.8357e-19	39.0256	Down
OXCT1	-1.42917	3.44634	-6.2738	1.99545e-08	1.1785e-07	8.87617	Down
RRN3	-1.42915	3.7856	-6.75068	2.60865e-09	1.93746e-08	10.8691	Down
MTG1	-1.42914	2.41903	-7.76421	3.16003e-11	4.32109e-10	15.205	Down
CRTC1	-1.42825	3.31244	-7.50616	9.79807e-11	1.11202e-09	14.092	Down
TRIM65	-1.42811	3.51659	-6.06229	4.85814e-08	2.57662e-07	8.00628	Down
CD84	-1.42737	4.3749	-6.18896	2.85433e-08	1.61165e-07	8.52607	Down
MAP3K4	-1.42722	3.35485	-7.18173	4.03798e-10	3.80801e-09	12.7002	Down
GLI4	-1.42653	3.73938	-7.89963	1.74263e-11	2.60795e-10	15.7907	Down
RPL18	-1.42606	7.25819	-5.34482	9.21296e-07	3.64397e-06	5.13921	Down
DDX51	-1.42569	2.72388	-5.50365	4.85809e-07	2.03392e-06	5.76128	Down
VAV2	-1.42568	2.96258	-6.54707	6.24588e-09	4.18101e-08	10.0133	Down
RPL14	-1.42566	5.64539	-4.04438	0.00012506	0.000324635	0.409062	Down
HEATR9	-1.4255	1.39991	-7.41944	1.43183e-10	1.55033e-09	13.719	Down
RPS14	-1.42526	7.65109	-3.61999	0.000529563	0.00122383	-0.958101	Down
AKR1B1	-1.42522	3.70645	-5.67534	2.41356e-07	1.08208e-06	6.44228	Down
MGAT4A	-1.42502	4.7742	-7.772	3.05378e-11	4.20633e-10	15.2387	Down
ADCY9	-1.42481	2.18997	-7.75371	3.30923e-11	4.4961e-10	15.1596	Down
TULP4	-1.42478	2.7747	-7.00955	8.52909e-10	7.34854e-09	11.966	Down
ZZZ3	-1.42413	2.92656	-7.96739	1.29348e-11	2.01583e-10	16.0841	Down
EEFSEC	-1.42383	3.44126	-7.08379	6.18082e-10	5.52461e-09	12.2821	Down
TTC27	-1.42374	3.01096	-7.21052	3.56232e-10	3.42759e-09	12.8234	Down
SNRPD3	-1.4234	3.89847	-7.57611	7.21274e-11	8.59447e-10	14.3932	Down
NOL6	-1.4232	3.35376	-6.15521	3.28988e-08	1.82776e-07	8.38723	Down
ENTPD6	-1.42314	3.6401	-5.42061	6.7947e-07	2.75756e-06	5.43505	Down
RPS12	-1.42302	10.1368	-4.1407	8.90201e-05	0.000237908	0.733097	Down
MAML2	-1.42279	3.98659	-5.43013	6.53897e-07	2.66398e-06	5.47234	Down
ZNF235	-1.42233	1.96012	-8.81201	3.12895e-13	8.23828e-12	19.75	Down
MFHAS1	-1.42137	3.39396	-7.42799	1.37931e-10	1.4992e-09	13.7558	Down
ZNF827	-1.42078	1.41849	-10.2435	5.9469e-16	4.58576e-14	25.9268	Down
BBS2	-1.42051	2.06871	-9.41308	2.22611e-14	9.27418e-13	22.3553	Down
NSMCE4A	-1.4205	3.77631	-6.02318	5.72121e-08	2.98765e-07	7.84654	Down
ARPIN	-1.42008	1.68283	-6.03763	5.38597e-08	2.83089e-07	7.90552	Down
CEP72	-1.41997	2.01966	-8.2126	4.39334e-12	7.95871e-11	17.1472	Down
CEP126	-1.41962	0.93436	-13.2336	2.16381e-21	1.46758e-18	38.2575	Down
ZNF420	-1.41894	2.00044	-8.8228	2.98367e-13	7.88023e-12	19.7969	Down
SUCLG2	-1.41847	4.3476	-7.07206	6.50357e-10	5.77353e-09	12.2322	Down
SCIMP	-1.41793	4.37162	-4.95568	4.2779e-06	1.47882e-05	3.65096	Down
PPP1R3E	-1.41743	3.71867	-6.9255	1.22723e-09	1.00916e-08	11.6088	Down
RHOH	-1.41735	4.33317	-7.28664	2.55675e-10	2.56979e-09	13.1492	Down
BMI1	-1.417	3.28424	-6.57771	5.47904e-09	3.72057e-08	10.1417	Down
EBF4	-1.41695	0.902976	-10.0254	1.53305e-15	9.45249e-14	24.9932	Down
CACNB1	-1.41657	1.81861	-8.26943	3.42017e-12	6.54542e-11	17.3938	Down
ERAP2	-1.41557	4.83207	-5.40224	7.31629e-07	2.95369e-06	5.36316	Down
ZNF251	-1.41536	2.42078	-8.27881	3.28163e-12	6.34473e-11	17.4345	Down
LUC7L	-1.41519	4.22243	-6.68028	3.53033e-09	2.52575e-08	10.5724	Down
CLCF1	-1.41513	2.4465	-6.11331	3.92287e-08	2.13467e-07	8.21523	Down
TFAP4	-1.41439	1.72251	-9.44289	1.95324e-14	8.34237e-13	22.4842	Down
ALMS1	-1.4137	2.22173	-7.79132	2.8053e-11	3.93764e-10	15.3222	Down
ZFPM1	-1.41355	2.68434	-8.75506	4.02142e-13	1.03628e-11	19.5027	Down
DPY19L4	-1.41292	2.0973	-8.48657	1.31325e-12	2.87928e-11	18.3366	Down
CCL28	-1.41265	1.631	-9.04921	1.10109e-13	3.57665e-12	20.7794	Down
THEM6	-1.41264	2.59502	-7.35644	1.88551e-10	1.96743e-09	13.4485	Down
RASSF4	-1.41228	3.8058	-4.75542	9.24077e-06	2.97149e-05	2.90713	Down
B3GNT7	-1.41205	1.30812	-7.40527	1.52329e-10	1.63474e-09	13.6582	Down
ZMYM3	-1.41198	2.86385	-6.29168	1.8502e-08	1.1e-07	8.95011	Down
TTC19	-1.41186	3.06021	-7.40069	1.5541e-10	1.66465e-09	13.6385	Down
NEMP2	-1.41179	2.20157	-8.18733	4.91086e-12	8.71923e-11	17.0376	Down
SFMBT1	-1.41114	2.58281	-8.21737	4.30204e-12	7.84358e-11	17.1679	Down
MDC1	-1.41046	3.07212	-6.268	2.04496e-08	1.20292e-07	8.85219	Down
GRPEL2	-1.41033	2.99717	-8.42336	1.7353e-12	3.70109e-11	18.0621	Down
LYRM7	-1.40973	2.71849	-8.40023	1.92156e-12	4.04243e-11	17.9617	Down
ZMYND19	-1.40972	2.82109	-5.83117	1.27087e-07	6.08898e-07	7.06753	Down
GDPD5	-1.40955	2.9553	-6.54659	6.2586e-09	4.18788e-08	10.0113	Down
LMO7	-1.40856	1.27628	-11.0494	1.85698e-17	2.38538e-15	29.3436	Down
ZNF485	-1.40806	1.43373	-9.90418	2.59921e-15	1.53562e-13	24.4727	Down
RPL4	-1.40797	7.54323	-4.5502	2.00304e-05	6.03581e-05	2.16212	Down
PPIE	-1.40748	2.65452	-6.5381	6.48992e-09	4.32389e-08	9.97576	Down
TRMT61A	-1.40737	2.53272	-7.96278	1.32001e-11	2.04964e-10	16.0641	Down
MFSD8	-1.40722	2.95576	-8.366	2.23448e-12	4.59804e-11	17.8131	Down
URGCP	-1.40712	2.41667	-7.88627	1.84811e-11	2.74519e-10	15.7329	Down
SLC37A2	-1.40706	2.95404	-5.14106	2.07106e-06	7.64407e-06	4.35326	Down
EVA1C	-1.40698	1.95768	-8.48966	1.29547e-12	2.84902e-11	18.3501	Down
NR2C1	-1.40657	2.83651	-7.0362	7.59852e-10	6.63784e-09	12.0794	Down
REXO4	-1.4059	3.74537	-6.32084	1.63531e-08	9.85372e-08	9.07091	Down
ABCE1	-1.40568	3.4917	-6.21967	2.50786e-08	1.43952e-07	8.65261	Down
TNFAIP8L1	-1.40548	2.4136	-8.03547	9.58588e-12	1.56137e-10	16.379	Down
UTP20	-1.40504	2.20522	-7.79407	2.77166e-11	3.89686e-10	15.334	Down
TIMM23B	-1.40485	2.20506	-8.63891	6.70933e-13	1.61138e-11	18.9983	Down
NKTR	-1.40441	5.14685	-6.77311	2.36859e-09	1.78497e-08	10.9638	Down
KLF11	-1.4042	3.44967	-4.73324	1.00544e-05	3.20998e-05	2.82576	Down
OFD1	-1.40336	3.38216	-8.29721	3.02596e-12	5.91108e-11	17.5144	Down
MTERF2	-1.40314	2.46876	-8.1199	6.60934e-12	1.12744e-10	16.7451	Down
ZBTB14	-1.40307	3.7123	-7.77596	3.00116e-11	4.15071e-10	15.2558	Down
PDCD4	-1.40288	6.06597	-6.15575	3.2823e-08	1.82415e-07	8.38948	Down
ADARB1	-1.40203	3.08548	-7.13839	4.87563e-10	4.49056e-09	12.5151	Down
ZNF483	-1.40175	1.17771	-11.0068	2.22727e-17	2.81832e-15	29.1645	Down
CENPK	-1.40132	2.65709	-5.91507	8.97601e-08	4.45216e-07	7.40681	Down
ZNF649	-1.40126	1.96647	-9.2916	3.79389e-14	1.45213e-12	21.8297	Down
TMEM116	-1.40061	2.11759	-9.01854	1.26019e-13	3.9791e-12	20.6463	Down
PJA1	-1.40059	2.78297	-6.00003	6.30187e-08	3.2528e-07	7.75213	Down
EIF3L	-1.40008	5.44346	-6.47188	8.60861e-09	5.56703e-08	9.69904	Down
CFAP36	-1.40002	2.79149	-7.28776	2.5443e-10	2.5603e-09	13.154	Down
UBE2Q2	-1.39918	3.82489	-6.56711	5.73291e-09	3.87743e-08	10.0973	Down
SETD6	-1.39873	1.74925	-7.65489	5.10604e-11	6.4707e-10	14.733	Down
AARS2	-1.39864	2.73135	-7.37096	1.7696e-10	1.86138e-09	13.5109	Down
EEF1A1	-1.39863	9.7333	-4.62288	1.52586e-05	4.70837e-05	2.4239	Down
ZNF594	-1.39861	2.22254	-7.29253	2.49191e-10	2.51655e-09	13.1745	Down
LAS1L	-1.39849	2.51996	-7.16802	4.28625e-10	4.00869e-09	12.6416	Down
SLC45A3	-1.39809	2.18351	-6.3143	1.68123e-08	1.01089e-07	9.04381	Down
RPL5	-1.3978	7.07674	-3.62186	0.000526309	0.00121731	-0.952297	Down
TASP1	-1.39728	2.27781	-8.58445	8.52981e-13	2.00043e-11	18.7618	Down
FCRL1	-1.39724	5.03192	-4.38388	3.70334e-05	0.000106106	1.57204	Down
URB1	-1.39654	2.45524	-7.48875	1.05739e-10	1.19368e-09	14.0171	Down
RAB30	-1.39554	2.34027	-6.23698	2.33121e-08	1.35092e-07	8.72405	Down
DCAF4	-1.39544	1.83008	-7.80318	2.66289e-11	3.7658e-10	15.3734	Down
HOPX	-1.39499	2.27065	-5.92946	8.45508e-08	4.2253e-07	7.46517	Down
CDHR3	-1.39475	0.949103	-12.7247	1.7e-20	9.0079e-18	36.2313	Down
SARDH	-1.39387	0.936246	-9.71437	5.95141e-15	2.98557e-13	23.6559	Down
SNPH	-1.39337	2.0605	-7.18954	3.90312e-10	3.70556e-09	12.7336	Down
DNMT1	-1.39254	3.55486	-5.93106	8.39905e-08	4.20225e-07	7.47166	Down
ZNF566	-1.39253	1.47166	-10.2403	6.02991e-16	4.60555e-14	25.9131	Down
PPP1R13B	-1.39249	1.69996	-9.03807	1.1564e-13	3.71363e-12	20.7311	Down
ZNF544	-1.39031	2.26988	-7.76503	3.14876e-11	4.31263e-10	15.2085	Down
SMYD2	-1.39002	3.3134	-6.56441	5.79962e-09	3.9124e-08	10.0859	Down
MARS2	-1.3897	2.71876	-6.75202	2.59367e-09	1.92803e-08	10.8747	Down
CD52	-1.38962	7.85642	-2.72425	0.00799751	0.0150056	-3.47247	Down
KIR3DL2	-1.38868	1.88989	-5.29291	1.13383e-06	4.4024e-06	4.93764	Down
VPS13A	-1.38808	3.21318	-8.1757	5.16913e-12	9.09209e-11	16.9871	Down
CDK10	-1.38778	3.45384	-5.09429	2.48972e-06	9.03673e-06	4.17487	Down
BIRC3	-1.3876	4.85083	-5.05807	2.86975e-06	1.02463e-05	4.03729	Down
ZNF577	-1.38735	1.51981	-10.4305	2.64707e-16	2.3623e-14	26.7248	Down
MCCC1	-1.38713	3.16019	-7.51713	9.3388e-11	1.06704e-09	14.1392	Down
UQCC1	-1.38619	3.02302	-7.23998	3.13342e-10	3.05522e-09	12.9494	Down
UBE2V1	-1.38565	3.07046	-7.56824	7.46575e-11	8.85859e-10	14.3593	Down
PABPC4	-1.38558	4.25096	-5.81225	1.37419e-07	6.52866e-07	6.99129	Down
CLEC4C	-1.38512	1.99304	-4.55321	1.98068e-05	5.97908e-05	2.17291	Down
PLXNB2	-1.38476	5.09228	-4.05816	0.000119158	0.000310599	0.455098	Down
POGLUT1	-1.38471	2.89161	-6.99035	9.26879e-10	7.87448e-09	11.8843	Down
PMS1	-1.38471	2.87186	-7.09803	5.81006e-10	5.23183e-09	12.3429	Down
ALG13	-1.38457	3.66775	-8.08872	7.58239e-12	1.26917e-10	16.6098	Down
ICE2	-1.38412	2.58091	-8.21535	4.34048e-12	7.8967e-11	17.1591	Down
CPSF6	-1.38366	4.66846	-7.60063	6.47778e-11	7.83992e-10	14.4989	Down
RABL2B	-1.38364	2.9355	-6.59963	4.98846e-09	3.4217e-08	10.2336	Down
NOM1	-1.38322	2.85111	-7.04649	7.2667e-10	6.37755e-09	12.1232	Down
RPS3	-1.38254	7.6497	-4.40553	3.42087e-05	9.87642e-05	1.64813	Down
RIMKLB	-1.38231	2.12249	-6.73824	2.75205e-09	2.02975e-08	10.8166	Down
FANCF	-1.38229	3.04672	-7.34581	1.97502e-10	2.05074e-09	13.4029	Down
ZNF260	-1.38222	2.24186	-8.63316	6.88181e-13	1.64813e-11	18.9733	Down
TMC6	-1.38141	5.50691	-6.1624	3.19184e-08	1.77737e-07	8.4168	Down
DNPEP	-1.38121	3.25142	-5.94992	7.76511e-08	3.92042e-07	7.54827	Down
COLGALT2	-1.38119	0.926005	-9.30424	3.58907e-14	1.39578e-12	21.8844	Down
RAI1	-1.38083	2.65202	-7.52738	8.92875e-11	1.03323e-09	14.1833	Down
CCND2	-1.38071	4.75534	-5.30734	1.07037e-06	4.18088e-06	4.99356	Down
THOC3	-1.38043	2.97725	-6.5186	7.05343e-09	4.65543e-08	9.8942	Down
DIS3L	-1.38039	3.21001	-6.45468	9.26295e-09	5.93275e-08	9.6273	Down
IRF8	-1.38036	4.32887	-5.23844	1.40853e-06	5.36575e-06	4.7271	Down
ATP2B1	-1.3795	4.74172	-5.94191	8.0283e-08	4.03701e-07	7.51573	Down
MGA	-1.37947	3.21697	-7.15153	4.60483e-10	4.26897e-09	12.5712	Down
MLLT3	-1.37915	2.29444	-7.93473	1.49338e-11	2.2833e-10	15.9426	Down
RABEP2	-1.37913	3.46345	-6.04464	5.23039e-08	2.75767e-07	7.93416	Down
ACSS1	-1.37897	4.06537	-6.32662	1.59575e-08	9.64619e-08	9.09487	Down
RPS16	-1.37894	7.88825	-4.06803	0.000115094	0.000301023	0.48816	Down
ENPP5	-1.37831	1.16032	-8.57394	8.9346e-13	2.07812e-11	18.7161	Down
WDR11	-1.37774	3.79867	-6.74693	2.65104e-09	1.96464e-08	10.8533	Down
FXYD7	-1.37661	1.1025	-8.35287	2.36762e-12	4.82517e-11	17.7561	Down
HNRNPH1	-1.37645	6.80248	-4.42341	3.20336e-05	9.29435e-05	1.71114	Down
ARRDC5	-1.37639	3.63676	-6.58144	5.3921e-09	3.67183e-08	10.1573	Down
NEIL2	-1.37628	2.34157	-8.1735	5.21929e-12	9.14239e-11	16.9776	Down
GIMAP6	-1.37601	5.89274	-5.97197	7.08391e-08	3.61574e-07	7.6379	Down
HNRNPDL	-1.37579	6.09286	-5.23021	1.45532e-06	5.53283e-06	4.69539	Down
METTL8	-1.37576	1.896	-8.64193	6.6207e-13	1.59235e-11	19.0114	Down
G3BP1	-1.37573	3.8957	-7.64248	5.39171e-11	6.76697e-10	14.6794	Down
RPL26	-1.3755	3.86768	-3.59971	0.00056605	0.00130071	-1.02083	Down
FYCO1	-1.37494	3.46197	-7.46842	1.15574e-10	1.28265e-09	13.9296	Down
CREBL2	-1.37457	4.33869	-7.52592	8.98604e-11	1.03661e-09	14.1771	Down
ZBTB10	-1.37433	1.99523	-7.56019	7.73359e-11	9.12531e-10	14.3247	Down
LRFN3	-1.3743	1.47659	-8.97494	1.52681e-13	4.59016e-12	20.4572	Down
SATB1	-1.37428	4.43467	-8.3757	2.141e-12	4.45433e-11	17.8552	Down
DTD2	-1.37396	2.25422	-7.48572	1.07151e-10	1.20641e-09	14.004	Down
CIRBP	-1.37395	6.03045	-5.45698	5.86755e-07	2.41422e-06	5.57767	Down
DGCR8	-1.37333	3.14258	-6.29416	1.83088e-08	1.08889e-07	8.96038	Down
FUT11	-1.37323	3.70533	-7.55084	8.05703e-11	9.44779e-10	14.2844	Down
CPVL	-1.37317	5.47422	-3.7104	0.000392429	0.000931675	-0.675495	Down
TKTL1	-1.37298	1.40893	-7.01648	8.27679e-10	7.15661e-09	11.9955	Down
CEP290	-1.37285	1.49819	-9.676	7.03841e-15	3.46928e-13	23.4905	Down
MRI1	-1.37261	3.82601	-5.95665	7.55066e-08	3.8332e-07	7.57561	Down
ZNF721	-1.37251	3.25348	-8.19855	4.67405e-12	8.36886e-11	17.0862	Down
SOX13	-1.37231	1.41409	-7.12633	5.13804e-10	4.7016e-09	12.4636	Down
APRT	-1.37199	5.4453	-5.24157	1.3911e-06	5.30773e-06	4.73918	Down
RPA1	-1.37166	4.43509	-6.826	1.88591e-09	1.46619e-08	11.1873	Down
PRPS1	-1.37162	3.9214	-6.16741	3.12526e-08	1.74258e-07	8.43742	Down
KIR2DS4	-1.37077	2.10913	-4.74196	9.72677e-06	3.11712e-05	2.8577	Down
N4BP2	-1.37058	2.89433	-8.24645	3.78458e-12	7.11434e-11	17.2941	Down
FKTN	-1.37012	1.52229	-10.0755	1.23278e-15	8.16521e-14	25.2081	Down
PCID2	-1.37006	3.59388	-6.36751	1.34177e-08	8.22823e-08	9.26453	Down
OCM	-1.37002	1.90494	-7.54331	8.327e-11	9.71063e-10	14.252	Down
HIBADH	-1.37	2.96828	-7.10237	5.70177e-10	5.14525e-09	12.3614	Down
RPS18	-1.36981	8.42181	-2.75846	0.00727584	0.0137627	-3.38675	Down
ARHGAP5	-1.36947	2.87461	-7.54732	8.18232e-11	9.56823e-10	14.2692	Down
WDR54	-1.3687	2.20102	-5.61902	3.03866e-07	1.33308e-06	6.21797	Down
FLYWCH1	-1.36868	3.53687	-5.95476	7.61037e-08	3.85659e-07	7.56792	Down
RNMT	-1.36842	3.52446	-7.15244	4.58669e-10	4.25681e-09	12.5751	Down
ACVR2B	-1.36836	1.26007	-9.88033	2.88391e-15	1.65761e-13	24.3702	Down
ESYT2	-1.3674	5.3808	-7.58742	6.86373e-11	8.24815e-10	14.442	Down
SPEF2	-1.36676	0.958436	-13.876	1.67972e-22	2.03438e-19	40.7671	Down
TSPAN18	-1.3659	2.62334	-6.71393	3.05517e-09	2.21952e-08	10.7142	Down
DPP7	-1.3659	5.09347	-4.66616	1.29631e-05	4.04273e-05	2.58088	Down
BOD1	-1.36566	3.21369	-7.50089	1.00268e-10	1.13646e-09	14.0693	Down
PREPL	-1.36564	3.17468	-7.34583	1.97489e-10	2.05074e-09	13.403	Down
SDR39U1	-1.36549	4.10617	-5.31968	1.01886e-06	3.99625e-06	5.04145	Down
CD226	-1.36548	3.89284	-6.07462	4.61371e-08	2.46161e-07	8.05672	Down
HEMK1	-1.36547	2.4118	-7.46594	1.16838e-10	1.29484e-09	13.9189	Down
MXD4	-1.36545	4.64666	-7.39281	1.60854e-10	1.7143e-09	13.6046	Down
FBXO41	-1.36542	3.07949	-5.76303	1.6835e-07	7.8408e-07	6.79335	Down
DIP2C	-1.36441	1.06671	-11.5605	2.12739e-18	4.26767e-16	31.4782	Down
WDR77	-1.3642	3.66157	-6.81415	1.98472e-09	1.52968e-08	11.1372	Down
LRPPRC	-1.36371	2.46161	-7.72392	3.77173e-11	5.01989e-10	15.0309	Down
WDR43	-1.36319	3.80852	-6.24926	2.2135e-08	1.29065e-07	8.77473	Down
MTMR8	-1.36318	1.43958	-8.41077	1.83434e-12	3.8782e-11	18.0074	Down
PDCD11	-1.36244	3.33015	-6.39689	1.18439e-08	7.37512e-08	9.38665	Down
SCAI	-1.36187	1.95034	-8.96356	1.6052e-13	4.80031e-12	20.4078	Down
MEF2C	-1.36162	3.44968	-5.57644	3.61477e-07	1.55841e-06	6.04894	Down
TSPYL5	-1.36157	1.16785	-9.89234	2.7368e-15	1.58922e-13	24.4218	Down
LIMD1	-1.36109	3.43468	-6.16421	3.16765e-08	1.76506e-07	8.42424	Down
RPL19	-1.36106	7.84117	-4.54304	2.05723e-05	6.187e-05	2.13646	Down
PRR12	-1.36093	4.05251	-7.37827	1.71404e-10	1.81193e-09	13.5422	Down
TMEM156	-1.36062	3.06873	-5.69666	2.21154e-07	1.00104e-06	6.52745	Down
KLHL22	-1.3606	3.67452	-6.91026	1.31078e-09	1.06803e-08	11.5442	Down
TEF	-1.36053	1.65266	-8.51358	1.16583e-12	2.60103e-11	18.4539	Down
ZNF202	-1.3596	2.5145	-7.00662	8.63812e-10	7.42362e-09	11.9535	Down
MRPS9	-1.35944	3.65428	-5.9412	8.05231e-08	4.04788e-07	7.51281	Down
PPP5C	-1.3593	3.18634	-6.06091	4.88632e-08	2.58914e-07	8.00063	Down
CDK5RAP1	-1.35898	3.52731	-6.77297	2.37007e-09	1.78515e-08	10.9632	Down
CEP85L	-1.35894	4.05231	-7.43566	1.33378e-10	1.45437e-09	13.7888	Down
DCUN1D4	-1.35876	2.57568	-8.38763	2.03133e-12	4.24702e-11	17.907	Down
CXCR3	-1.35837	3.18793	-4.87976	5.73815e-06	1.92856e-05	3.36709	Down
NKG7	-1.35835	8.56768	-4.32857	4.5313e-05	0.000127799	1.37869	Down
ZNF345	-1.35828	1.55772	-10.2187	6.62204e-16	4.99037e-14	25.8208	Down
TRIM74	-1.35827	1.53238	-6.73407	2.80186e-09	2.0602e-08	10.799	Down
CRTC3	-1.3581	3.85163	-6.59935	4.99445e-09	3.42442e-08	10.2324	Down
NAF1	-1.35802	2.30742	-8.02914	9.85676e-12	1.59173e-10	16.3516	Down
FLT4	-1.35751	0.826909	-10.3559	3.65454e-16	3.00691e-14	26.4068	Down
TMEM161B	-1.35675	2.80166	-8.17397	5.20858e-12	9.14239e-11	16.9796	Down
ZNF385A	-1.35669	4.78252	-4.11411	9.78213e-05	0.000258559	0.643158	Down
FGFBP3	-1.35662	1.43493	-8.98539	1.45812e-13	4.44673e-12	20.5025	Down
MLLT6	-1.35649	5.8131	-5.17956	1.77889e-06	6.6482e-06	4.50068	Down
KAT2A	-1.35636	3.61414	-5.11558	2.28977e-06	8.38742e-06	4.25597	Down
SPIN3	-1.35554	1.27582	-9.30169	3.62946e-14	1.40416e-12	21.8734	Down
GLMN	-1.35537	2.75263	-7.55559	7.89097e-11	9.2723e-10	14.3048	Down
DNAJA3	-1.35455	3.06367	-6.58296	5.35725e-09	3.64956e-08	10.1637	Down
CDIP1	-1.35434	3.4417	-6.80875	2.03154e-09	1.5615e-08	11.1143	Down
MYC	-1.35425	3.82385	-5.68002	2.36774e-07	1.06294e-06	6.46096	Down
SNX25	-1.35409	2.48377	-6.48373	8.18451e-09	5.32731e-08	9.74852	Down
TMA16	-1.35365	2.56965	-7.12334	5.20512e-10	4.75272e-09	12.4509	Down
PITPNM2	-1.35356	3.02507	-6.00219	6.24535e-08	3.22559e-07	7.76093	Down
EXOSC2	-1.35355	2.58698	-6.99337	9.14845e-10	7.79895e-09	11.8972	Down
IPO9	-1.35309	3.32927	-6.99483	9.0906e-10	7.77308e-09	11.9034	Down
MCCC2	-1.35302	2.10449	-7.72262	3.79321e-11	5.04453e-10	15.0253	Down
BDH1	-1.352	1.70821	-8.33499	2.56179e-12	5.12237e-11	17.6784	Down
PRDM11	-1.3515	1.24576	-11.2146	9.19088e-18	1.39278e-15	30.0367	Down
CD47	-1.35129	6.02095	-7.56795	7.47528e-11	8.8637e-10	14.3581	Down
ZNF304	-1.35124	2.17059	-8.55689	9.63201e-13	2.21903e-11	18.642	Down
EIF4B	-1.35113	7.20063	-5.9713	7.10379e-08	3.6237e-07	7.63517	Down
ALKBH3	-1.35112	3.04251	-7.70011	4.18719e-11	5.49519e-10	14.9281	Down
PHLDB2	-1.35106	1.12448	-11.4518	3.36517e-18	6.13546e-16	31.0265	Down
ZNF320	-1.35102	1.87723	-8.87184	2.40404e-13	6.60663e-12	20.0097	Down
RASSF1	-1.35063	5.5453	-5.7768	1.59065e-07	7.43208e-07	6.84866	Down
FASTKD2	-1.3506	2.35423	-8.072	8.16161e-12	1.35277e-10	16.5374	Down
MAGOHB	-1.3497	2.22547	-7.72241	3.79681e-11	5.04535e-10	15.0244	Down
CDR2	-1.34967	3.70044	-7.5444	8.28748e-11	9.6712e-10	14.2566	Down
TRIO	-1.34951	2.62906	-7.15605	4.51515e-10	4.19731e-09	12.5905	Down
TRIT1	-1.34947	2.30149	-7.77611	2.99909e-11	4.15071e-10	15.2564	Down
ESF1	-1.34941	2.59585	-5.7945	1.47867e-07	6.97033e-07	6.91984	Down
CROT	-1.34934	2.09234	-8.50769	1.19648e-12	2.64505e-11	18.4284	Down
CRIM1	-1.34933	1.69519	-7.66199	4.94947e-11	6.28638e-10	14.7636	Down
ZNF681	-1.34909	1.10669	-12.7502	1.53184e-20	8.37869e-18	36.3338	Down
FBXW8	-1.34898	2.58616	-7.33206	2.09718e-10	2.16535e-09	13.3439	Down
VMAC	-1.34894	3.84558	-7.4153	1.45794e-10	1.57659e-09	13.7013	Down
OSBPL10	-1.34893	1.62223	-6.75816	2.52599e-09	1.88433e-08	10.9007	Down
OTUD3	-1.34883	2.6222	-6.78163	2.28331e-09	1.72838e-08	10.9997	Down
TYW3	-1.34831	2.58568	-6.79641	2.14241e-09	1.63855e-08	11.0622	Down
QRSL1	-1.34813	2.81371	-6.64127	4.17337e-09	2.9217e-08	10.4084	Down
ZNF585B	-1.34808	2.05301	-9.28615	3.88576e-14	1.47729e-12	21.8061	Down
BRF1	-1.34802	2.57237	-7.52958	8.84318e-11	1.02421e-09	14.1928	Down
JRK	-1.34787	3.11883	-7.16488	4.34515e-10	4.05483e-09	12.6282	Down
SDR42E1	-1.34757	1.17966	-10.791	5.60916e-17	6.18734e-15	28.2542	Down
ANKMY1	-1.34747	2.80525	-7.94194	1.44673e-11	2.22199e-10	15.9739	Down
AK1	-1.34737	1.64887	-7.23228	3.24026e-10	3.15033e-09	12.9164	Down
METAP1D	-1.34731	1.58149	-8.37164	2.17964e-12	4.51258e-11	17.8375	Down
TAGLN	-1.34667	2.42139	-5.88697	1.00866e-07	4.95879e-07	7.29297	Down
ZNF329	-1.34629	2.11424	-8.91242	2.01058e-13	5.71044e-12	20.1859	Down
TMEM238	-1.34613	2.88112	-6.73423	2.79989e-09	2.05965e-08	10.7997	Down
PCBP4	-1.34605	2.08285	-5.88122	1.03299e-07	5.07103e-07	7.26972	Down
FCRL2	-1.34588	3.26918	-4.61773	1.55571e-05	4.7909e-05	2.40525	Down
TBC1D31	-1.34578	2.38016	-7.39932	1.56341e-10	1.67171e-09	13.6326	Down
TSPAN3	-1.34564	2.45715	-6.83352	1.82574e-09	1.42398e-08	11.2191	Down
GCN1	-1.3452	4.4178	-5.89461	9.77164e-08	4.81231e-07	7.32393	Down
CAPRIN2	-1.34507	3.1199	-7.71917	3.85108e-11	5.11346e-10	15.0104	Down
BCL7A	-1.34507	1.71402	-6.8731	1.53907e-09	1.22749e-08	11.3867	Down
CXCR6	-1.3447	1.78295	-6.38058	1.26934e-08	7.8322e-08	9.31885	Down
CCR6	-1.34405	1.0242	-10.7021	8.21543e-17	8.8165e-15	27.8781	Down
AP3M2	-1.3432	2.68519	-7.22259	3.38003e-10	3.27309e-09	12.875	Down
SPATA5	-1.34312	1.73559	-7.84864	2.18062e-11	3.18471e-10	15.57	Down
NBPF11	-1.34295	3.17565	-6.47777	8.39504e-09	5.44554e-08	9.72365	Down
COQ6	-1.34267	2.20427	-7.38874	1.63739e-10	1.74067e-09	13.5872	Down
FAHD2B	-1.34263	1.62775	-7.66115	4.96778e-11	6.30491e-10	14.76	Down
AGAP6	-1.34253	1.85509	-9.33685	3.11029e-14	1.22647e-12	22.0256	Down
HMG20A	-1.34239	3.38205	-7.33377	2.08165e-10	2.15223e-09	13.3512	Down
MALT1	-1.34202	3.45663	-7.69307	4.31862e-11	5.61911e-10	14.8977	Down
ZBTB5	-1.34167	2.67012	-6.97535	9.89092e-10	8.32931e-09	11.8206	Down
BCL11A	-1.34147	2.05284	-6.37901	1.27786e-08	7.87334e-08	9.31229	Down
TPP2	-1.34146	3.42463	-7.20856	3.59293e-10	3.45165e-09	12.8149	Down
TMEM18	-1.34103	2.37153	-7.40167	1.54742e-10	1.6593e-09	13.6427	Down
GPR18	-1.34091	2.51175	-5.96166	7.39486e-08	3.75861e-07	7.59596	Down
UPF3A	-1.3405	3.85324	-5.60355	3.23665e-07	1.41009e-06	6.1565	Down
RHPN1	-1.34033	2.42169	-5.58548	3.48409e-07	1.50743e-06	6.08478	Down
TBC1D10A	-1.33907	3.1124	-9.05162	1.08946e-13	3.54567e-12	20.7898	Down
NPM1	-1.33828	5.17537	-4.35408	4.12936e-05	0.000117302	1.46767	Down
ZC3H8	-1.33811	2.11604	-7.70015	4.18646e-11	5.49519e-10	14.9283	Down
TAS2R4	-1.3381	1.53988	-7.98686	1.18729e-11	1.87445e-10	16.1684	Down
TRUB1	-1.33756	2.43601	-7.78729	2.85546e-11	3.98823e-10	15.3047	Down
MFSD6	-1.33751	3.55971	-6.88308	1.47416e-09	1.18296e-08	11.4289	Down
ZNF789	-1.33744	2.25656	-9.25562	4.44329e-14	1.64859e-12	21.6739	Down
DDX54	-1.33737	4.04394	-5.41096	7.06401e-07	2.8607e-06	5.39727	Down
ZNF589	-1.33728	3.3891	-5.9807	6.83084e-08	3.50026e-07	7.67343	Down
DDX18	-1.33723	4.00587	-5.91733	8.89204e-08	4.41504e-07	7.41598	Down
NVL	-1.33713	3.06761	-7.26133	2.8551e-10	2.83755e-09	13.0408	Down
TTC22	-1.33703	2.42481	-8.10243	7.13815e-12	1.20793e-10	16.6693	Down
TSPYL2	-1.33696	3.71168	-3.54402	0.000678916	0.00153571	-1.19179	Down
NOLC1	-1.33673	4.43087	-5.20662	1.59818e-06	6.02195e-06	4.60456	Down
MTA3	-1.33656	1.80141	-8.93126	1.85056e-13	5.41e-12	20.2676	Down
SERGEF	-1.33626	2.69823	-7.48509	1.07446e-10	1.20812e-09	14.0013	Down
DNAJC19	-1.33625	2.52608	-7.58916	6.81169e-11	8.19142e-10	14.4495	Down
POLG2	-1.33624	3.77998	-6.20195	2.70233e-08	1.53916e-07	8.57958	Down
RIC8B	-1.33598	2.18102	-8.39623	1.95571e-12	4.10918e-11	17.9443	Down
ACVR2A	-1.3358	1.73733	-7.85509	2.11971e-11	3.10646e-10	15.5979	Down
DDX24	-1.33541	4.61321	-5.84014	1.22457e-07	5.89547e-07	7.10373	Down
ERCC1	-1.33519	3.62274	-6.38646	1.23806e-08	7.6727e-08	9.34327	Down
PDCD7	-1.33509	3.66923	-6.46798	8.75267e-09	5.64512e-08	9.68279	Down
PKIA	-1.33421	2.39236	-6.78602	2.24049e-09	1.70052e-08	11.0183	Down
NAA35	-1.33394	3.12134	-7.78528	2.8807e-11	4.01686e-10	15.2961	Down
SCFD2	-1.33388	3.18322	-6.53795	6.49395e-09	4.32488e-08	9.97516	Down
PACS2	-1.33329	2.74526	-6.85521	1.66262e-09	1.31613e-08	11.3109	Down
SYNGR1	-1.33322	2.05395	-5.74303	1.82796e-07	8.42098e-07	6.71309	Down
CCDC152	-1.33297	1.19804	-8.3302	2.61644e-12	5.21321e-11	17.6576	Down
RTKN2	-1.33259	1.30538	-8.18281	5.00967e-12	8.87607e-11	17.0179	Down
HOOK1	-1.33245	1.1704	-9.66921	7.25044e-15	3.55313e-13	23.4612	Down
TELO2	-1.33212	3.6425	-5.40641	7.19458e-07	2.90871e-06	5.37947	Down
ZDHHC1	-1.33192	0.792429	-9.34218	3.03836e-14	1.20512e-12	22.0486	Down
PRPF39	-1.33174	3.60382	-6.04997	5.11512e-08	2.70109e-07	7.95593	Down
ZNF567	-1.33135	1.94267	-8.46834	1.42315e-12	3.08185e-11	18.2575	Down
RPL38	-1.3313	6.45604	-2.84959	0.0056346	0.0108803	-3.15417	Down
HLTF	-1.33122	2.44778	-7.20083	3.71587e-10	3.55767e-09	12.7819	Down
ADCK2	-1.331	3.01478	-6.93401	1.18288e-09	9.75054e-09	11.645	Down
TUBGCP6	-1.33087	4.77847	-6.01197	5.9954e-08	3.11261e-07	7.80082	Down
NIT2	-1.33076	2.11725	-7.84711	2.19538e-11	3.19527e-10	15.5634	Down
PAQR7	-1.33049	2.52654	-6.73699	2.76686e-09	2.03623e-08	10.8114	Down
HACL1	-1.33007	3.34356	-7.65353	5.13662e-11	6.5046e-10	14.7271	Down
C1orf159	-1.32977	1.99659	-7.69304	4.31916e-11	5.61911e-10	14.8976	Down
MPI	-1.32976	2.32537	-7.35927	1.86228e-10	1.94919e-09	13.4607	Down
ZDHHC8	-1.32893	3.4561	-5.39147	7.64015e-07	3.06982e-06	5.32107	Down
RPS15	-1.3286	7.89935	-4.69227	1.17451e-05	3.70065e-05	2.67595	Down
FAAH2	-1.32833	1.72969	-6.71188	3.08224e-09	2.23535e-08	10.7055	Down
ANK3	-1.3282	1.2272	-8.28307	3.22065e-12	6.24006e-11	17.453	Down
CCDC92	-1.32811	2.85786	-7.15343	4.5669e-10	4.24076e-09	12.5793	Down
MBNL2	-1.32794	3.35427	-6.17204	3.06501e-08	1.71576e-07	8.45644	Down
EXOSC7	-1.32751	2.62887	-7.19962	3.73546e-10	3.57441e-09	12.7767	Down
VPS13C	-1.32733	5.1437	-6.44026	9.84941e-09	6.26901e-08	9.56719	Down
RPL37A	-1.32714	6.57181	-2.71617	0.00817727	0.0153056	-3.4926	Down
TDRD3	-1.3271	2.28475	-8.43677	1.63563e-12	3.50617e-11	18.1204	Down
CNNM3	-1.32675	4.04457	-7.4558	1.22133e-10	1.34911e-09	13.8754	Down
ICAM2	-1.32672	4.73264	-5.50521	4.82751e-07	2.02162e-06	5.76743	Down
ZNF682	-1.32628	1.34155	-9.89897	2.65891e-15	1.56001e-13	24.4503	Down
GNGT2	-1.32555	2.68753	-5.74408	1.82013e-07	8.39103e-07	6.71727	Down
TMEM106B	-1.32536	2.83674	-9.15987	6.76796e-14	2.37593e-12	21.2591	Down
EXOSC10	-1.32458	3.90449	-6.01795	5.84771e-08	3.04526e-07	7.82518	Down
SLC35A3	-1.32412	2.123	-8.68355	5.51115e-13	1.35234e-11	19.1922	Down
ADHFE1	-1.32365	1.62144	-7.4712	1.14176e-10	1.27116e-09	13.9416	Down
NOL11	-1.32347	3.53151	-6.38555	1.24287e-08	7.69427e-08	9.33948	Down
PDPR	-1.32324	4.02999	-6.13663	3.55694e-08	1.95626e-07	8.31094	Down
NAA40	-1.32311	3.36304	-5.92271	8.69573e-08	4.32762e-07	7.43777	Down
GNPDA2	-1.32293	1.67724	-9.39985	2.35912e-14	9.66214e-13	22.2981	Down
ITPKB	-1.32264	5.78784	-7.61679	6.03469e-11	7.38269e-10	14.5686	Down
ACSF2	-1.32243	2.33995	-7.6692	4.79543e-11	6.13208e-10	14.7947	Down
DPH2	-1.32184	3.20013	-5.62815	2.92753e-07	1.28933e-06	6.25424	Down
P2RY8	-1.32157	5.96461	-6.60377	4.9007e-09	3.36832e-08	10.251	Down
ZNF664	-1.32143	3.88029	-5.53594	4.26176e-07	1.80927e-06	5.8887	Down
RPS17	-1.32081	2.86999	-6.3509	1.43973e-08	8.77814e-08	9.19556	Down
FBXO4	-1.3207	2.15088	-7.05843	6.8998e-10	6.09021e-09	12.1741	Down
ZNF507	-1.32057	3.0603	-7.73328	3.6198e-11	4.8443e-10	15.0714	Down
PDE3B	-1.31961	4.45112	-6.01611	5.89282e-08	3.06602e-07	7.81768	Down
TTN	-1.3195	1.13729	-7.84778	2.18888e-11	3.19128e-10	15.5663	Down
FMO4	-1.31904	1.69294	-9.38215	2.54958e-14	1.0392e-12	22.2215	Down
TMEM229B	-1.31879	3.37507	-6.13122	3.63878e-08	1.9948e-07	8.2887	Down
CMC1	-1.31837	2.49601	-6.88058	1.49015e-09	1.19296e-08	11.4184	Down
UXS1	-1.31772	3.46783	-7.61693	6.03097e-11	7.38269e-10	14.5692	Down
POLR1B	-1.3175	2.43047	-6.95708	1.07052e-09	8.94783e-09	11.7429	Down
KIFC2	-1.31681	3.55368	-4.24938	6.03504e-05	0.000166282	1.10442	Down
PRMT6	-1.31658	2.28798	-7.47984	1.09944e-10	1.23162e-09	13.9787	Down
CAPN15	-1.31617	4.29856	-5.28673	1.16213e-06	4.50092e-06	4.91372	Down
NUP160	-1.31584	3.60419	-6.87165	1.54875e-09	1.23405e-08	11.3805	Down
TMEM14A	-1.31536	2.51652	-5.09526	2.48023e-06	9.00532e-06	4.17857	Down
CHCHD6	-1.315	1.29616	-9.55367	1.20213e-14	5.47937e-13	22.9628	Down
RPS6	-1.31489	8.24322	-3.24012	0.00177568	0.00374997	-2.09036	Down
POP5	-1.31434	3.37527	-5.11911	2.2582e-06	8.27892e-06	4.26943	Down
PUS1	-1.31426	2.88581	-5.61722	3.06107e-07	1.34222e-06	6.21081	Down
STYX	-1.31384	4.168	-7.62017	5.94585e-11	7.31624e-10	14.5832	Down
DTX1	-1.31378	1.95494	-5.99364	6.47201e-08	3.33149e-07	7.72612	Down
INPP5E	-1.31336	2.50885	-5.85213	1.16531e-07	5.62776e-07	7.15211	Down
EEF2	-1.31247	9.29709	-6.48947	7.98677e-09	5.21061e-08	9.77247	Down
PTPRM	-1.31214	1.37148	-8.28505	3.19256e-12	6.19371e-11	17.4616	Down
DET1	-1.31172	1.07446	-12.3288	8.6313e-20	3.25227e-17	34.6331	Down
RPP30	-1.31143	2.72868	-7.29965	2.41578e-10	2.45854e-09	13.2049	Down
ZNF502	-1.31097	1.16468	-11.1987	9.83296e-18	1.42502e-15	29.9701	Down
PPP2R2B	-1.3107	1.28725	-8.4247	1.72507e-12	3.68392e-11	18.0679	Down
DNAJC30	-1.3105	2.59609	-7.17591	4.14163e-10	3.89925e-09	12.6753	Down
PPRC1	-1.31045	3.21557	-6.33842	1.51798e-08	9.20562e-08	9.14376	Down
FUBP1	-1.31032	5.23565	-6.64628	4.08476e-09	2.86677e-08	10.4295	Down
EPHA1	-1.30986	2.24587	-6.76324	2.47144e-09	1.85014e-08	10.9221	Down
SNAPC3	-1.3093	4.053	-6.42747	1.04e-08	6.59221e-08	9.51394	Down
RPE	-1.30922	4.28287	-5.7598	1.70607e-07	7.93639e-07	6.78036	Down
RPL36A	-1.3091	1.84398	-6.74207	2.70703e-09	2.00089e-08	10.8328	Down
ARRB1	-1.30899	4.65266	-5.75196	1.76202e-07	8.1475e-07	6.7489	Down
MRPL42	-1.30836	2.39332	-8.34666	2.43338e-12	4.93546e-11	17.7291	Down
ZNF606	-1.30799	2.03273	-10.0308	1.49759e-15	9.3357e-14	25.0163	Down
GK5	-1.30788	3.22876	-6.66356	3.79281e-09	2.6883e-08	10.5021	Down
RBM28	-1.30744	2.58445	-8.40183	1.908e-12	4.0189e-11	17.9687	Down
MORC2	-1.30739	2.93928	-7.19014	3.89291e-10	3.69794e-09	12.7362	Down
PDE7A	-1.30724	5.01335	-7.33195	2.09818e-10	2.16535e-09	13.3435	Down
TMEM161A	-1.30713	2.47471	-5.77606	1.59552e-07	7.4528e-07	6.84567	Down
CCR4	-1.30709	3.31658	-5.58157	3.53999e-07	1.52889e-06	6.06929	Down
PPP1R3F	-1.30649	2.47995	-9.79635	4.16011e-15	2.26086e-13	24.009	Down
RPS8	-1.30632	8.00382	-3.97347	0.000160169	0.000408272	0.173637	Down
ATN1	-1.30573	3.2771	-5.62153	3.00768e-07	1.32188e-06	6.22794	Down
RPL12	-1.30559	7.70207	-3.77967	0.000311011	0.000752821	-0.455729	Down
RPL7A	-1.30536	8.79175	-5.17889	1.78364e-06	6.66449e-06	4.49809	Down
PRPF19	-1.30433	5.00877	-5.36729	8.41942e-07	3.35905e-06	5.2267	Down
GTPBP3	-1.30423	2.37616	-5.80782	1.39961e-07	6.63642e-07	6.97342	Down
GGACT	-1.30408	1.51523	-7.06386	6.73929e-10	5.96718e-09	12.1972	Down
RPSA	-1.30387	6.5517	-4.21411	6.85053e-05	0.000186899	0.983248	Down
YES1	-1.30331	1.85589	-9.33552	3.1285e-14	1.22794e-12	22.0198	Down
ST6GALNAC6	-1.30313	1.20248	-6.39967	1.1705e-08	7.30745e-08	9.3982	Down
TDRKH	-1.30277	1.86412	-8.93823	1.79463e-13	5.25556e-12	20.2979	Down
PCMTD2	-1.30268	4.47885	-8.07953	7.89532e-12	1.31506e-10	16.57	Down
ADRB2	-1.30211	4.62054	-6.24732	2.23171e-08	1.29993e-07	8.76671	Down
ZNF10	-1.30154	1.55432	-9.40485	2.30792e-14	9.49831e-13	22.3197	Down
SLC30A4	-1.30153	1.29724	-9.50611	1.48054e-14	6.53753e-13	22.7574	Down
POLR1C	-1.30146	2.05348	-6.9092	1.31684e-09	1.07193e-08	11.5397	Down
IGFBP3	-1.30134	0.936961	-8.76692	3.81653e-13	9.91011e-12	19.5542	Down
CBY1	-1.30099	2.53816	-8.66036	6.10414e-13	1.48071e-11	19.0915	Down
LRIG2	-1.30065	2.75472	-7.38074	1.69561e-10	1.79468e-09	13.5528	Down
TIMM10B	-1.30062	4.12867	-7.29821	2.43097e-10	2.46972e-09	13.1988	Down
SMAD7	-1.30042	3.38026	-6.74189	2.70918e-09	2.00161e-08	10.832	Down
PHLDB3	-1.30029	1.76777	-8.44545	1.57425e-12	3.39174e-11	18.1581	Down
BDP1	-1.2994	3.73445	-7.76876	3.09756e-11	4.25281e-10	15.2247	Down
ZNF696	-1.29923	2.0951	-7.73984	3.51703e-11	4.72167e-10	15.0997	Down
ZNF26	-1.29893	1.82273	-8.9258	1.89555e-13	5.49402e-12	20.244	Down
TNFRSF18	-1.29883	2.24631	-4.46903	2.70758e-05	7.95938e-05	1.87253	Down
ZFP36L2	-1.2988	8.02876	-5.28764	1.15796e-06	4.48784e-06	4.91721	Down
NUP205	-1.2983	3.87628	-6.37108	1.32159e-08	8.11915e-08	9.27936	Down
RPS21	-1.29815	7.77489	-3.17849	0.00214386	0.00446576	-2.26523	Down
ZNF48	-1.29801	2.19116	-7.69558	4.27131e-11	5.58187e-10	14.9086	Down
AGAP9	-1.29795	2.15958	-4.60608	1.62527e-05	4.98969e-05	2.36315	Down
CHML	-1.29789	2.71935	-8.4352	1.64703e-12	3.52613e-11	18.1135	Down
FAM120C	-1.29788	1.57936	-9.52666	1.35309e-14	6.02316e-13	22.8461	Down
RPS19	-1.29784	7.73681	-4.68179	1.22201e-05	3.83497e-05	2.63775	Down
RPS6KA5	-1.29755	2.30631	-6.04264	5.27425e-08	2.7782e-07	7.926	Down
MRPS30	-1.29747	3.19572	-7.1697	4.255e-10	3.98386e-09	12.6488	Down
NCBP2	-1.29746	3.87003	-5.46005	5.79518e-07	2.3856e-06	5.58974	Down
TNK1	-1.29722	1.07207	-7.71586	3.90752e-11	5.18028e-10	14.9961	Down
WDR36	-1.2972	3.13668	-6.4243	1.05414e-08	6.67188e-08	9.50071	Down
MAGEH1	-1.29709	2.96158	-4.97784	3.92499e-06	1.36657e-05	3.73423	Down
RNF126	-1.29686	4.65027	-6.09498	4.23631e-08	2.28445e-07	8.14011	Down
IGSF8	-1.29672	4.17503	-5.13403	2.12926e-06	7.84691e-06	4.3264	Down
RPL29	-1.29663	8.19195	-4.64105	1.42508e-05	4.41669e-05	2.48968	Down
PFAS	-1.29642	2.4151	-6.87905	1.50004e-09	1.19918e-08	11.4119	Down
SF3B3	-1.29622	4.13157	-6.76311	2.47279e-09	1.85034e-08	10.9215	Down
ZNF66	-1.29621	2.50288	-5.27283	1.22838e-06	4.73805e-06	4.8599	Down
EBF1	-1.29497	1.48387	-7.31345	2.27459e-10	2.32898e-09	13.2641	Down
FOXP3	-1.29491	1.51171	-6.25961	2.11883e-08	1.241e-07	8.81748	Down
CRYGS	-1.29473	2.15922	-6.93683	1.16851e-09	9.65084e-09	11.657	Down
GPD1L	-1.29438	3.13874	-7.17168	4.21841e-10	3.96274e-09	12.6573	Down
FOLR2	-1.29434	1.53116	-6.00734	6.11252e-08	3.16373e-07	7.78193	Down
SP4	-1.29381	3.72231	-7.63191	5.64751e-11	7.02562e-10	14.6338	Down
SRFBP1	-1.29333	2.32357	-7.1676	4.29395e-10	4.01368e-09	12.6399	Down
KIF22	-1.29318	3.21818	-5.40934	7.11009e-07	2.87798e-06	5.39095	Down
ZNF441	-1.29311	2.4756	-6.98358	9.54481e-10	8.06033e-09	11.8555	Down
C8orf33	-1.29265	2.93808	-7.06123	6.81655e-10	6.02614e-09	12.186	Down
HKDC1	-1.29264	1.24101	-8.37873	2.11253e-12	4.4005e-11	17.8683	Down
ULK3	-1.29255	4.19088	-5.20602	1.60193e-06	6.03339e-06	4.60229	Down
ZNF677	-1.29254	1.02192	-12.6236	2.56965e-20	1.1776e-17	35.825	Down
PDE8A	-1.29247	2.65609	-7.1994	3.73906e-10	3.57583e-09	12.7758	Down
TSEN2	-1.29238	1.3892	-10.576	1.4134e-16	1.42652e-14	27.3433	Down
EMG1	-1.29208	3.13938	-6.96457	1.03636e-09	8.70357e-09	11.7747	Down
COA4	-1.29206	3.73936	-5.77833	1.58066e-07	7.39154e-07	6.8548	Down
AFAP1	-1.29192	1.42462	-8.86416	2.48668e-13	6.81167e-12	19.9764	Down
NCR3LG1	-1.29104	1.25708	-9.10547	8.59688e-14	2.89799e-12	21.0233	Down
EML5	-1.29092	1.00013	-11.1879	1.02973e-17	1.47967e-15	29.9247	Down
ZNF418	-1.29072	1.35416	-9.10739	8.52467e-14	2.87937e-12	21.0316	Down
ASF1A	-1.29062	3.69434	-7.47963	1.10043e-10	1.23162e-09	13.9778	Down
RARG	-1.29053	2.59946	-6.79224	2.18125e-09	1.6645e-08	11.0446	Down
IPO5	-1.29034	3.50421	-6.01777	5.85201e-08	3.04656e-07	7.82446	Down
COL19A1	-1.29027	1.39132	-6.74585	2.66343e-09	1.97124e-08	10.8487	Down
MBNL3	-1.28966	4.24331	-4.51695	2.26698e-05	6.77098e-05	2.04314	Down
MSH2	-1.28963	1.87314	-8.11482	6.75893e-12	1.1518e-10	16.723	Down
CREBZF	-1.28909	4.83267	-6.60921	4.78782e-09	3.30009e-08	10.2738	Down
CNOT6L	-1.28906	5.14765	-7.53119	8.78101e-11	1.01771e-09	14.1998	Down
THAP7	-1.28902	3.255	-6.7375	2.76079e-09	2.03362e-08	10.8135	Down
RDH14	-1.28849	2.9651	-6.42114	1.06838e-08	6.75694e-08	9.48758	Down
CALHM2	-1.28804	4.21652	-5.11457	2.29891e-06	8.41728e-06	4.25211	Down
EIF2D	-1.28785	2.99922	-6.64713	4.06987e-09	2.85987e-08	10.433	Down
ZNF607	-1.28777	1.29532	-10.3661	3.49694e-16	2.92089e-14	26.4503	Down
CYTH3	-1.28763	2.42177	-7.98576	1.19304e-11	1.88178e-10	16.1636	Down
ZNF14	-1.28741	2.90318	-6.7634	2.4697e-09	1.84966e-08	10.9228	Down
ZNF75A	-1.28721	2.78004	-8.59778	8.04333e-13	1.8942e-11	18.8196	Down
WRN	-1.28712	2.34105	-8.52094	1.12858e-12	2.53795e-11	18.4859	Down
ZNF559	-1.2871	2.51807	-7.59505	6.63813e-11	8.01112e-10	14.4749	Down
C12orf42	-1.28707	1.15441	-9.26674	4.23145e-14	1.59087e-12	21.7221	Down
AIMP1	-1.28697	3.19623	-5.72845	1.94095e-07	8.88997e-07	6.65464	Down
CTLA4	-1.28677	2.69403	-4.63882	1.43708e-05	4.45142e-05	2.48161	Down
ZNF599	-1.28647	1.02253	-12.5665	3.24637e-20	1.36285e-17	35.5951	Down
CBR3	-1.28621	1.45219	-7.25528	2.9314e-10	2.89655e-09	13.0149	Down
PPARD	-1.28517	3.87385	-6.75143	2.60027e-09	1.93209e-08	10.8722	Down
ZNF793	-1.28515	0.956884	-11.8844	5.46543e-19	1.42572e-16	32.8165	Down
ATR	-1.28512	2.66808	-7.255	2.93493e-10	2.89721e-09	13.0137	Down
IMMP1L	-1.28509	1.83112	-8.71853	4.72367e-13	1.19544e-11	19.3441	Down
ZNF195	-1.28491	2.53113	-7.48494	1.07517e-10	1.20812e-09	14.0007	Down
PELP1	-1.2848	3.30105	-5.90075	9.52589e-08	4.69943e-07	7.34878	Down
UBQLN4	-1.28454	3.56717	-5.60293	3.24487e-07	1.41258e-06	6.15403	Down
FAM135A	-1.28451	1.59137	-9.15259	6.98811e-14	2.43307e-12	21.2275	Down
ZNF500	-1.28435	2.30015	-8.16045	5.52822e-12	9.63375e-11	16.9209	Down
ZNF814	-1.28433	1.67355	-8.9884	1.43895e-13	4.4121e-12	20.5156	Down
MAGEF1	-1.28341	3.12651	-4.61847	1.55139e-05	4.77933e-05	2.40793	Down
MEN1	-1.28325	3.36494	-5.26844	1.25004e-06	4.81393e-06	4.84293	Down
C11orf80	-1.28294	2.23266	-6.10341	4.08917e-08	2.2145e-07	8.17465	Down
P3H4	-1.28265	1.11462	-9.72026	5.80013e-15	2.93573e-13	23.6813	Down
GSTM2	-1.28257	1.53926	-5.67733	2.39394e-07	1.07357e-06	6.45024	Down
SPATA20	-1.28253	2.85362	-4.86464	6.08215e-06	2.0349e-05	3.31085	Down
XCL1	-1.28236	1.19478	-5.92996	8.43757e-08	4.21779e-07	7.46719	Down
EP400	-1.28236	3.71718	-6.91672	1.27471e-09	1.04314e-08	11.5716	Down
WDR81	-1.2823	4.18422	-5.85889	1.13315e-07	5.49121e-07	7.17942	Down
CEP95	-1.28224	3.56305	-6.37092	1.32248e-08	8.1212e-08	9.2787	Down
ANKAR	-1.28207	1.92057	-7.52395	9.06399e-11	1.04196e-09	14.1686	Down
ENOPH1	-1.28185	3.86943	-5.68251	2.34372e-07	1.05409e-06	6.47089	Down
CASK	-1.28181	1.81693	-9.45334	1.86583e-14	8.00936e-13	22.5293	Down
ITPA	-1.28164	4.34006	-5.10951	2.34508e-06	8.56964e-06	4.23285	Down
NBPF3	-1.28161	1.70591	-6.91418	1.28876e-09	1.05312e-08	11.5608	Down
SMKR1	-1.2813	1.18266	-6.11256	3.93527e-08	2.13935e-07	8.21214	Down
RPL32	-1.28111	7.44441	-3.77571	0.000315194	0.000762401	-0.468366	Down
RLN1	-1.28103	0.91277	-11.3952	4.27429e-18	7.62893e-16	30.7909	Down
SGPP1	-1.28071	3.63173	-7.05598	6.9736e-10	6.15216e-09	12.1637	Down
LDAH	-1.28034	2.56444	-7.2612	2.85663e-10	2.83755e-09	13.0402	Down
WNT7A	-1.28033	0.767323	-12.5628	3.29541e-20	1.36285e-17	35.5804	Down
PER3	-1.28006	1.22819	-12.6529	2.27934e-20	1.07357e-17	35.9429	Down
GUF1	-1.27995	3.54417	-7.69318	4.31651e-11	5.61911e-10	14.8982	Down
ALDH5A1	-1.27992	2.36553	-6.38123	1.26586e-08	7.81359e-08	9.32153	Down
CYP4F22	-1.27988	0.935556	-8.40245	1.90283e-12	4.01298e-11	17.9713	Down
GEMIN8	-1.27968	2.36385	-7.11025	5.50983e-10	4.99865e-09	12.395	Down
NUDT14	-1.27939	2.48406	-5.68599	2.31048e-07	1.04082e-06	6.48481	Down
NUDT13	-1.27927	1.38498	-8.03808	9.47638e-12	1.5465e-10	16.3903	Down
RPS13	-1.27918	7.69347	-3.84732	0.000247234	0.000609316	-0.238425	Down
SLC25A36	-1.27904	3.38941	-6.17314	3.05085e-08	1.70896e-07	8.46097	Down
KLHL42	-1.27893	2.66541	-7.0531	7.06133e-10	6.21984e-09	12.1514	Down
ZNF76	-1.27859	3.4527	-5.63618	2.83299e-07	1.25192e-06	6.28621	Down
ZCCHC14	-1.27835	2.70395	-8.99313	1.40929e-13	4.35262e-12	20.5361	Down
GSPT2	-1.27832	2.09444	-6.78939	2.20825e-09	1.6818e-08	11.0325	Down
NT5DC1	-1.27824	2.80891	-7.89492	1.77914e-11	2.65556e-10	15.7703	Down
AGPAT5	-1.27795	2.57007	-6.66727	3.733e-09	2.65173e-08	10.5177	Down
NOL4L	-1.27794	4.24747	-6.50323	7.53146e-09	4.944e-08	9.82997	Down
CRY1	-1.27766	2.77088	-6.6	4.98041e-09	3.41756e-08	10.2352	Down
RNF165	-1.27766	0.785294	-10.7973	5.459e-17	6.08966e-15	28.281	Down
DLG3	-1.2774	1.59222	-6.84428	1.74289e-09	1.36944e-08	11.2647	Down
RDH13	-1.27736	1.59386	-8.53981	1.03853e-12	2.36684e-11	18.5679	Down
CRYZ	-1.27727	2.44873	-5.58358	3.51114e-07	1.51836e-06	6.07726	Down
ZNF621	-1.27717	3.18948	-7.584	6.96734e-11	8.33868e-10	14.4273	Down
MGMT	-1.2767	2.22148	-8.00642	1.08932e-11	1.73923e-10	16.2532	Down
CTDSPL2	-1.27618	3.47187	-7.53332	8.69951e-11	1.00964e-09	14.2089	Down
RPS20	-1.27601	6.35399	-3.27698	0.00158471	0.00337483	-1.98455	Down
DDX55	-1.27596	3.07144	-6.49257	7.88173e-09	5.15001e-08	9.78544	Down
TSTD2	-1.27586	2.67779	-7.37543	1.73538e-10	1.82992e-09	13.53	Down
FAM171A1	-1.2757	1.30366	-8.36353	2.25897e-12	4.63717e-11	17.8023	Down
FOXO1	-1.27563	4.30455	-6.99378	9.13201e-10	7.79627e-09	11.8989	Down
MS4A14	-1.27543	2.51517	-4.7448	9.62218e-06	3.08477e-05	2.86813	Down
LRRC56	-1.27542	1.47972	-7.55796	7.80953e-11	9.20211e-10	14.315	Down
DROSHA	-1.27527	3.17013	-7.44986	1.25352e-10	1.37749e-09	13.8498	Down
ZNF383	-1.27521	2.13704	-8.75017	4.10893e-13	1.05562e-11	19.4815	Down
SERPINF1	-1.27516	1.45816	-6.78521	2.24837e-09	1.70422e-08	11.0149	Down
CENPC	-1.27507	3.33241	-6.8648	1.59521e-09	1.2669e-08	11.3515	Down
DPH7	-1.27433	3.13097	-6.23537	2.34708e-08	1.35966e-07	8.71741	Down
SUPV3L1	-1.27303	3.23818	-6.46644	8.81049e-09	5.6781e-08	9.67634	Down
LSS	-1.27277	3.29884	-6.03625	5.41713e-08	2.84639e-07	7.89989	Down
ZNF527	-1.27248	1.34601	-10.2434	5.94991e-16	4.58576e-14	25.9263	Down
FOXK1	-1.27245	4.03344	-7.85939	2.07998e-11	3.05616e-10	15.6165	Down
BOK	-1.27244	0.839835	-9.22784	5.0201e-14	1.8345e-12	21.5536	Down
DCP1B	-1.27207	2.51249	-8.12004	6.60541e-12	1.12744e-10	16.7457	Down
AHDC1	-1.27179	2.39343	-7.72678	3.72455e-11	4.961e-10	15.0433	Down
ZC2HC1A	-1.27176	1.62726	-7.95563	1.3622e-11	2.10359e-10	16.0331	Down
GPATCH11	-1.27176	2.90667	-6.5648	5.7899e-09	3.90819e-08	10.0876	Down
ZNF169	-1.27174	2.85263	-7.19354	3.83562e-10	3.64965e-09	12.7507	Down
LUC7L3	-1.2715	5.50158	-5.10272	2.40859e-06	8.77773e-06	4.20696	Down
NAP1L2	-1.27098	1.41718	-6.90516	1.34003e-09	1.08767e-08	11.5226	Down
VEZT	-1.27086	2.69429	-7.10286	5.68946e-10	5.13961e-09	12.3635	Down
KAT6B	-1.27055	2.20029	-9.15814	6.81961e-14	2.38912e-12	21.2516	Down
FSBP	-1.27036	0.757983	-13.2188	2.29672e-21	1.49782e-18	38.199	Down
NOB1	-1.27033	3.95344	-5.42698	6.62265e-07	2.69354e-06	5.45998	Down
AAK1	-1.27021	4.1315	-7.66974	4.78413e-11	6.12224e-10	14.797	Down
BUB3	-1.26991	4.31226	-7.08204	6.22804e-10	5.55804e-09	12.2747	Down
RMDN3	-1.26977	3.02257	-6.084	4.43591e-08	2.37722e-07	8.09512	Down
SLC20A2	-1.26962	2.7362	-7.90602	1.69435e-11	2.55146e-10	15.8184	Down
LSG1	-1.2696	3.91148	-6.10311	4.09446e-08	2.21597e-07	8.17339	Down
HGH1	-1.26933	2.92171	-6.09653	4.20887e-08	2.27134e-07	8.14646	Down
NAA16	-1.26921	3.97907	-7.20905	3.58526e-10	3.44624e-09	12.817	Down
IL2RA	-1.269	2.01866	-6.93536	1.17597e-09	9.70305e-09	11.6507	Down
WDR86	-1.26896	1.00517	-10.2038	7.06237e-16	5.25217e-14	25.7573	Down
ELP3	-1.2688	3.12868	-6.98989	9.28753e-10	7.88245e-09	11.8823	Down
UFSP2	-1.26843	2.87295	-6.72258	2.94374e-09	2.14869e-08	10.7506	Down
CNPY2	-1.26836	2.3556	-6.50121	7.5966e-09	4.97905e-08	9.82153	Down
PTPDC1	-1.26813	1.22624	-11.8224	7.08317e-19	1.79257e-16	32.5612	Down
CD86	-1.26785	4.08404	-3.97065	0.000161747	0.000411861	0.164317	Down
FXN	-1.26741	1.57918	-9.76096	4.85545e-15	2.54888e-13	23.8566	Down
ZDBF2	-1.26727	1.3649	-8.82969	2.89445e-13	7.72886e-12	19.8268	Down
PTMA	-1.26673	7.60429	-3.3901	0.00111213	0.00242693	-1.65428	Down
ARVCF	-1.26652	1.21508	-7.90343	1.71376e-11	2.57611e-10	15.8071	Down
POLR1A	-1.26639	2.23755	-7.37292	1.75456e-10	1.84785e-09	13.5192	Down
ZNF101	-1.26638	4.32943	-7.37773	1.71804e-10	1.81502e-09	13.5399	Down
B4GALT7	-1.26632	2.70103	-6.68606	3.44382e-09	2.47115e-08	10.5968	Down
TANGO6	-1.26613	2.82275	-6.51147	7.27116e-09	4.78981e-08	9.86442	Down
ZNF41	-1.2659	2.72814	-7.38415	1.67058e-10	1.77261e-09	13.5674	Down
KCTD17	-1.26538	2.87837	-5.25191	1.33506e-06	5.11463e-06	4.77908	Down
NSUN6	-1.2651	3.35363	-7.12807	5.09925e-10	4.67367e-09	12.471	Down
TMEM245	-1.26507	3.6028	-6.92384	1.23603e-09	1.01492e-08	11.6018	Down
TMEM209	-1.2641	3.13079	-7.12712	5.12035e-10	4.69047e-09	12.467	Down
TRMT44	-1.26199	2.25173	-8.06464	8.43041e-12	1.394e-10	16.5055	Down
ZIK1	-1.26197	1.19407	-10.1915	7.44957e-16	5.46818e-14	25.7047	Down
AGK	-1.26195	2.35374	-7.3607	1.85068e-10	1.93825e-09	13.4668	Down
NUP188	-1.26184	3.42649	-5.6957	2.22027e-07	1.00472e-06	6.52361	Down
TBCD	-1.26155	2.73722	-7.45126	1.24586e-10	1.37086e-09	13.8558	Down
DUSP7	-1.26134	3.55595	-5.83447	1.25366e-07	6.01558e-07	7.08083	Down
TDP1	-1.26125	2.80557	-7.41026	1.49041e-10	1.60555e-09	13.6796	Down
MAN2C1	-1.26104	4.51711	-4.64316	1.41377e-05	4.38565e-05	2.49735	Down
ANKS3	-1.26081	1.74012	-7.67528	4.66913e-11	6.00681e-10	14.821	Down
UNK	-1.26075	3.64515	-7.23535	3.19733e-10	3.11217e-09	12.9295	Down
RBFA	-1.26062	1.39844	-9.41528	2.20474e-14	9.2305e-13	22.3648	Down
TMEM120B	-1.2603	1.80549	-7.92304	1.57213e-11	2.38649e-10	15.892	Down
RPL35	-1.26018	7.4115	-2.72036	0.00808363	0.0151488	-3.48217	Down
CEP68	-1.26001	2.5347	-8.92548	1.89825e-13	5.49402e-12	20.2426	Down
ETAA1	-1.25981	2.02108	-7.38706	1.64943e-10	1.75236e-09	13.58	Down
SP140L	-1.25913	4.48488	-6.19769	2.7512e-08	1.56212e-07	8.56205	Down
ZSCAN12	-1.25903	1.55214	-8.9829	1.47424e-13	4.4798e-12	20.4917	Down
ZRANB2	-1.25899	5.44334	-6.16755	3.12341e-08	1.74212e-07	8.43799	Down
ZNF786	-1.2589	2.52958	-7.72999	3.67246e-11	4.90317e-10	15.0572	Down
TCTN1	-1.25881	1.32832	-9.56079	1.16521e-14	5.3543e-13	22.9935	Down
ANKRD46	-1.2587	1.94131	-8.34119	2.49273e-12	5.03175e-11	17.7053	Down
CYP20A1	-1.25779	3.03722	-7.49017	1.05086e-10	1.18868e-09	14.0232	Down
EXD3	-1.25764	1.83322	-8.67221	5.79364e-13	1.41552e-11	19.1429	Down
PPOX	-1.25755	2.8603	-5.61958	3.03175e-07	1.33072e-06	6.22018	Down
UROS	-1.25752	2.4311	-7.78285	2.9117e-11	4.05011e-10	15.2855	Down
CARNMT1	-1.25682	2.90723	-6.71054	3.10008e-09	2.24637e-08	10.6999	Down
EXOC6B	-1.25675	1.67893	-8.92407	1.91005e-13	5.50552e-12	20.2364	Down
ZNF841	-1.25672	3.43241	-7.03279	7.7118e-10	6.72294e-09	12.0649	Down
ZNF484	-1.25654	3.16689	-7.47491	1.12341e-10	1.25402e-09	13.9575	Down
ZNF718	-1.25646	2.63233	-8.05168	8.9254e-12	1.46504e-10	16.4493	Down
WDR6	-1.25592	5.1676	-4.80091	7.7676e-06	2.53625e-05	3.07468	Down
VPS51	-1.2559	5.13198	-6.4526	9.34524e-09	5.97954e-08	9.61864	Down
CLCC1	-1.25576	2.07499	-7.88617	1.8489e-11	2.74519e-10	15.7324	Down
ZNF708	-1.25509	3.52262	-6.39341	1.20205e-08	7.47137e-08	9.37217	Down
IGFBP4	-1.25437	1.85142	-5.84705	1.19005e-07	5.73744e-07	7.13162	Down
RPL6	-1.25426	6.88234	-3.0435	0.00321342	0.00648112	-2.63926	Down
MYO9A	-1.25414	2.29831	-8.29785	3.01752e-12	5.9014e-11	17.5172	Down
MZF1	-1.25401	3.67855	-6.65772	3.88908e-09	2.74878e-08	10.4776	Down
EXOSC5	-1.2538	2.41077	-5.60966	3.15709e-07	1.37932e-06	6.18074	Down
ZNF17	-1.25333	1.90836	-7.77534	3.00932e-11	4.1586e-10	15.2531	Down
LEPROTL1	-1.25304	4.81248	-7.72864	3.69432e-11	4.9246e-10	15.0513	Down
TMEM63A	-1.25295	5.38706	-6.51216	7.24992e-09	4.77954e-08	9.86728	Down
RPL15	-1.25287	6.93747	-4.75884	9.12122e-06	2.93862e-05	2.91969	Down
PAN2	-1.25261	3.7522	-4.76926	8.76578e-06	2.83231e-05	2.95803	Down
THRA	-1.25229	3.51418	-6.79908	2.11797e-09	1.62132e-08	11.0735	Down
XKR6	-1.25191	1.82915	-7.85053	2.16259e-11	3.1611e-10	15.5782	Down
PIGU	-1.25179	2.68112	-6.98428	9.51574e-10	8.04332e-09	11.8585	Down
ANXA2R	-1.25171	3.73635	-6.05511	5.00636e-08	2.64696e-07	7.97692	Down
UCP2	-1.25167	7.2836	-6.95132	1.09752e-09	9.1268e-09	11.7185	Down
TMEM25	-1.2509	1.25756	-8.51184	1.17481e-12	2.61292e-11	18.4464	Down
NDUFV1	-1.25087	4.47056	-4.74102	9.76145e-06	3.12765e-05	2.85427	Down
DGCR6L	-1.25042	4.62969	-5.62927	2.91408e-07	1.28408e-06	6.25873	Down
ZNF43	-1.25033	2.16179	-7.24682	3.04146e-10	2.98443e-09	12.9786	Down
LETMD1	-1.25033	3.94946	-6.23881	2.31333e-08	1.34148e-07	8.73158	Down
ABI2	-1.25014	1.65955	-8.97526	1.52462e-13	4.59016e-12	20.4586	Down
NHLRC2	-1.25009	3.18195	-6.89464	1.40236e-09	1.13225e-08	11.4779	Down
RSL1D1	-1.25006	4.37238	-4.85796	6.2407e-06	2.08384e-05	3.286	Down
ZNF431	-1.24913	2.63654	-8.09304	7.4394e-12	1.24894e-10	16.6286	Down
D2HGDH	-1.24912	3.59622	-5.09426	2.48995e-06	9.03673e-06	4.17478	Down
AGAP4	-1.24868	3.48476	-7.50445	9.87157e-11	1.11961e-09	14.0846	Down
PACSIN1	-1.24864	1.19353	-6.68	3.53455e-09	2.5277e-08	10.5713	Down
JAKMIP2	-1.24863	1.08474	-8.11269	6.82269e-12	1.16034e-10	16.7138	Down
MECR	-1.24855	1.81367	-8.28967	3.12827e-12	6.08291e-11	17.4817	Down
IL18BP	-1.2484	2.99253	-6.82468	1.89667e-09	1.47253e-08	11.1817	Down
ZC3H7B	-1.24813	3.82192	-6.03613	5.41996e-08	2.84699e-07	7.89938	Down
ZNF239	-1.2478	1.0507	-9.56616	1.13813e-14	5.24406e-13	23.0167	Down
ZNF563	-1.24777	1.34423	-9.68284	6.83094e-15	3.37684e-13	23.52	Down
ZNF580	-1.24754	4.40987	-5.5591	3.87901e-07	1.66218e-06	5.98027	Down
ZNF808	-1.24736	3.72607	-7.14089	4.82293e-10	4.4517e-09	12.5258	Down
SOCS7	-1.24727	2.68762	-7.07222	6.49909e-10	5.77258e-09	12.2328	Down
RHOF	-1.24723	4.52108	-6.88336	1.47235e-09	1.18207e-08	11.4301	Down
HDDC2	-1.2471	2.50864	-6.13125	3.63828e-08	1.9948e-07	8.28883	Down
HLCS	-1.24708	1.73516	-8.69713	5.19084e-13	1.28867e-11	19.2512	Down
RRP9	-1.24691	3.35421	-4.75843	9.13525e-06	2.94202e-05	2.91821	Down
PHLPP2	-1.24685	1.84234	-8.72442	4.60266e-13	1.17006e-11	19.3697	Down
MIPEP	-1.24656	1.87684	-8.0043	1.09953e-11	1.75387e-10	16.244	Down
TULP3	-1.2464	1.90566	-7.48954	1.05374e-10	1.19115e-09	14.0205	Down
CDC16	-1.24634	4.68149	-6.46212	8.97414e-09	5.76822e-08	9.65832	Down
DZIP3	-1.24616	2.34823	-8.01225	1.06174e-11	1.69999e-10	16.2784	Down
IL5RA	-1.24584	1.28817	-5.57453	3.64295e-07	1.56896e-06	6.04138	Down
TXLNG	-1.24562	3.24071	-6.21181	2.59234e-08	1.48449e-07	8.62021	Down
THTPA	-1.24562	2.31976	-7.41074	1.4873e-10	1.60412e-09	13.6817	Down
CCDC107	-1.24538	3.95994	-4.36132	4.02162e-05	0.000114625	1.49301	Down
TUBE1	-1.24502	1.98093	-8.74765	4.15481e-13	1.06579e-11	19.4706	Down
CLEC4F	-1.24468	0.574183	-5.97153	7.09705e-08	3.62135e-07	7.6361	Down
ALG10	-1.2445	2.51647	-7.29953	2.41707e-10	2.45854e-09	13.2044	Down
RBAK	-1.24445	2.91451	-7.26512	2.80831e-10	2.7994e-09	13.057	Down
ADCK1	-1.24425	1.75531	-8.16252	5.47799e-12	9.56589e-11	16.9299	Down
RAD1	-1.24424	2.56558	-7.63567	5.55516e-11	6.93107e-10	14.65	Down
BEX4	-1.24412	3.74541	-3.57074	0.000622328	0.00141812	-1.10999	Down
CENPB	-1.244	5.0519	-5.10191	2.41629e-06	8.79952e-06	4.20387	Down
LIPT1	-1.24374	2.36709	-7.21828	3.44397e-10	3.3293e-09	12.8565	Down
BNIP3	-1.24365	2.77637	-7.62519	5.81639e-11	7.17779e-10	14.6048	Down
CLOCK	-1.24335	2.37826	-7.6947	4.28781e-11	5.59692e-10	14.9048	Down
MYO6	-1.24321	1.04612	-8.21758	4.29801e-12	7.84358e-11	17.1688	Down
AKAP12	-1.24241	0.761772	-9.11402	8.27947e-14	2.82974e-12	21.0604	Down
DOK2	-1.24184	6.36552	-4.2487	6.04992e-05	0.000166584	1.10206	Down
UBFD1	-1.24175	2.99329	-6.70908	3.11953e-09	2.25853e-08	10.6937	Down
NAE1	-1.24164	3.18832	-6.14748	3.39854e-08	1.88319e-07	8.35547	Down
CCSER2	-1.24141	4.26974	-7.6414	5.41736e-11	6.78912e-10	14.6747	Down
AKAP7	-1.24095	2.12167	-9.10126	8.75751e-14	2.94044e-12	21.0051	Down
MRPS6	-1.24095	3.2703	-5.97311	7.05034e-08	3.60077e-07	7.64254	Down
LYSMD4	-1.24075	2.23622	-7.69301	4.31979e-11	5.61911e-10	14.8975	Down
MTERF3	-1.24074	2.99805	-6.0431	5.26431e-08	2.77382e-07	7.92784	Down
SETD1A	-1.24041	3.487	-5.9325	8.34889e-08	4.18332e-07	7.4775	Down
NFATC3	-1.24012	4.85479	-6.90097	1.36447e-09	1.10487e-08	11.5048	Down
TJP3	-1.23981	1.09546	-8.67293	5.77527e-13	1.41307e-11	19.146	Down
GPALPP1	-1.23979	2.37141	-8.12343	6.50734e-12	1.1134e-10	16.7604	Down
PTGES2	-1.23976	3.23028	-5.76369	1.67894e-07	7.82427e-07	6.79599	Down
KDSR	-1.23961	2.24743	-7.78424	2.89395e-11	4.03203e-10	15.2916	Down
CBX7	-1.23955	4.88127	-6.56218	5.85504e-09	3.94744e-08	10.0766	Down
TEX10	-1.23915	2.68984	-7.63258	5.63101e-11	7.01024e-10	14.6367	Down
LYAR	-1.23913	3.96827	-4.68517	1.20647e-05	3.79114e-05	2.65008	Down
SCMH1	-1.23897	2.56001	-7.21673	3.46738e-10	3.34811e-09	12.8499	Down
GPR153	-1.23888	1.35381	-7.02134	8.10416e-10	7.02885e-09	12.0161	Down
TSR1	-1.23863	3.26237	-5.81644	1.35066e-07	6.43672e-07	7.00814	Down
SETDB2	-1.23849	3.45643	-7.07737	6.35548e-10	5.66387e-09	12.2548	Down
ZNF609	-1.23843	3.89986	-7.43194	1.35567e-10	1.47445e-09	13.7728	Down
ZBTB41	-1.2373	2.46929	-7.60915	6.24036e-11	7.5742e-10	14.5356	Down
N4BP3	-1.23729	1.29463	-7.84563	2.20971e-11	3.20786e-10	15.557	Down
POMGNT1	-1.23654	2.22268	-6.07844	4.54047e-08	2.42712e-07	8.07236	Down
ROBO3	-1.23636	0.906103	-7.83639	2.30126e-11	3.33221e-10	15.5171	Down
NFATC2IP	-1.23586	4.79571	-5.53723	4.23947e-07	1.80252e-06	5.8938	Down
SAAL1	-1.23537	2.59074	-6.60894	4.79336e-09	3.30257e-08	10.2727	Down
ZMYM1	-1.23513	2.63748	-8.06452	8.43501e-12	1.394e-10	16.5049	Down
SSBP2	-1.23512	2.56829	-7.20243	3.69018e-10	3.53507e-09	12.7887	Down
RASSF7	-1.23476	3.39749	-5.31566	1.03535e-06	4.05623e-06	5.02587	Down
HNRNPR	-1.2344	4.8049	-6.20219	2.69954e-08	1.53809e-07	8.58059	Down
DHPS	-1.23413	2.69325	-5.69495	2.22711e-07	1.00728e-06	6.52061	Down
NBPF12	-1.23405	3.93363	-6.7897	2.20533e-09	1.68061e-08	11.0338	Down
ZNF181	-1.23394	1.71837	-8.70969	4.91142e-13	1.23741e-11	19.3057	Down
RAD51D	-1.23347	2.03469	-7.80813	2.60556e-11	3.69396e-10	15.3949	Down
DAZAP1	-1.23306	4.62728	-6.16592	3.145e-08	1.75301e-07	8.43126	Down
ZNF532	-1.23253	1.66568	-7.57201	7.34343e-11	8.72566e-10	14.3756	Down
ATG14	-1.23242	3.52836	-7.04091	7.44471e-10	6.51691e-09	12.0995	Down
UMPS	-1.23241	2.21421	-7.25324	2.95749e-10	2.91384e-09	13.0062	Down
RPUSD2	-1.2322	2.32874	-6.64675	4.07644e-09	2.8633e-08	10.4315	Down
ZNF480	-1.2317	2.44887	-7.53302	8.71081e-11	1.01026e-09	14.2076	Down
CDKAL1	-1.23144	3.04345	-6.22917	2.40932e-08	1.38944e-07	8.69182	Down
ZNF227	-1.2314	2.75245	-7.69788	4.2284e-11	5.5407e-10	14.9185	Down
LRRC14	-1.23121	3.44094	-6.7765	2.33428e-09	1.7599e-08	10.9781	Down
C7orf50	-1.23103	3.0591	-6.32225	1.62562e-08	9.80231e-08	9.07672	Down
UTP15	-1.23027	2.21633	-7.23286	3.23217e-10	3.14428e-09	12.9189	Down
KDM8	-1.23025	2.04086	-7.66784	4.82408e-11	6.15479e-10	14.7888	Down
METAP1	-1.22846	3.97848	-6.16797	3.11788e-08	1.73961e-07	8.43973	Down
RPS27A	-1.22842	7.25557	-2.69892	0.00857335	0.0159729	-3.53538	Down
EPHB6	-1.22822	3.28458	-5.44841	6.07425e-07	2.49381e-06	5.54401	Down
HADH	-1.22814	1.90596	-7.70405	4.11547e-11	5.41785e-10	14.9451	Down
RRS1	-1.22803	3.41805	-4.99692	3.64403e-06	1.27767e-05	3.80609	Down
ORMDL3	-1.22767	5.47154	-5.39909	7.4094e-07	2.98914e-06	5.35088	Down
ACKR3	-1.22756	1.60132	-7.56966	7.41936e-11	8.80972e-10	14.3655	Down
SGSM2	-1.22739	3.84053	-4.94823	4.40338e-06	1.51509e-05	3.623	Down
B3GALT6	-1.22735	3.47049	-6.78917	2.21034e-09	1.68216e-08	11.0316	Down
SLC41A3	-1.22698	2.42993	-6.15862	3.24302e-08	1.80468e-07	8.40126	Down
TCOF1	-1.22646	3.2208	-6.19817	2.74567e-08	1.5607e-07	8.56402	Down
COX20	-1.22621	3.5203	-6.44064	9.83355e-09	6.26127e-08	9.56877	Down
PEMT	-1.22618	2.84474	-6.3951	1.19346e-08	7.42342e-08	9.37919	Down
ATG9B	-1.22615	0.998756	-9.66067	7.52617e-15	3.66706e-13	23.4244	Down
ATAD3B	-1.22576	2.87616	-5.45279	5.96778e-07	2.45282e-06	5.5612	Down
SNX9	-1.22551	2.15882	-8.52655	1.10103e-12	2.4859e-11	18.5103	Down
TBCCD1	-1.22523	2.96059	-7.09726	5.8297e-10	5.24673e-09	12.3396	Down
ZNF662	-1.2252	0.664848	-13.0126	5.27672e-21	3.31378e-18	37.3815	Down
KRBOX4	-1.22486	2.73711	-7.59449	6.65429e-11	8.0249e-10	14.4725	Down
ATRN	-1.22473	3.17419	-6.52171	6.96035e-09	4.60295e-08	9.90721	Down
REPS1	-1.22421	3.23002	-7.51036	9.61967e-11	1.09397e-09	14.1101	Down
PDE6B	-1.22381	1.37716	-8.91565	1.98218e-13	5.65821e-12	20.1999	Down
PTCD2	-1.22324	1.61431	-8.79256	3.40894e-13	8.91266e-12	19.6655	Down
KNOP1	-1.2232	1.8731	-7.90218	1.72326e-11	2.58581e-10	15.8017	Down
EARS2	-1.2229	1.96026	-7.43621	1.33058e-10	1.45182e-09	13.7911	Down
FARSB	-1.22274	2.64098	-6.63663	4.25726e-09	2.9694e-08	10.3889	Down
DNAJC11	-1.2227	2.43148	-6.34637	1.46764e-08	8.92589e-08	9.17677	Down
BTAF1	-1.2227	4.94439	-6.41622	1.09098e-08	6.87424e-08	9.46708	Down
STAMBPL1	-1.22258	2.69914	-7.27527	2.6867e-10	2.69188e-09	13.1005	Down
IL27RA	-1.22211	5.21954	-4.62574	1.50956e-05	4.66063e-05	2.43423	Down
TYW1	-1.22207	3.18846	-6.90603	1.33499e-09	1.08514e-08	11.5263	Down
SPINK2	-1.22205	0.860463	-6.4415	9.79745e-09	6.24532e-08	9.57237	Down
ZDHHC14	-1.22199	1.21134	-10.4112	2.87749e-16	2.51498e-14	26.6425	Down
GNPTAB	-1.22166	4.22554	-6.3446	1.47868e-08	8.98658e-08	9.16943	Down
NAB2	-1.22156	2.40439	-6.36113	1.37858e-08	8.42957e-08	9.23804	Down
ODF2	-1.22152	3.45557	-5.49317	5.0689e-07	2.11383e-06	5.71996	Down
SOX12	-1.22099	2.05214	-7.03545	7.62306e-10	6.65585e-09	12.0762	Down
EFNB1	-1.22082	2.1238	-6.78753	2.22603e-09	1.69106e-08	11.0246	Down
EID2B	-1.22065	2.01221	-8.12892	6.35202e-12	1.09013e-10	16.7842	Down
UBA2	-1.22061	4.39202	-6.00325	6.21773e-08	3.21622e-07	7.76526	Down
RPAP2	-1.22031	2.16773	-8.07041	8.21883e-12	1.36092e-10	16.5305	Down
MARCKSL1	-1.22028	4.93044	-4.08555	0.000108205	0.000284146	0.546971	Down
COG1	-1.21993	3.73905	-6.56612	5.75726e-09	3.89235e-08	10.0931	Down
RPUSD4	-1.21954	3.09898	-5.74811	1.7902e-07	8.26425e-07	6.73344	Down
RHOBTB2	-1.21952	2.40786	-6.69832	3.26708e-09	2.3553e-08	10.6484	Down
SLC46A2	-1.21949	3.03048	-4.12432	9.43478e-05	0.000250589	0.677641	Down
NDC1	-1.21938	2.83165	-6.36678	1.34594e-08	8.25081e-08	9.26149	Down
COG2	-1.21888	2.62802	-7.42445	1.40081e-10	1.52062e-09	13.7406	Down
NOP56	-1.2181	4.42496	-4.3365	4.4024e-05	0.000124453	1.40633	Down
LIX1L	-1.21803	4.8056	-8.0907	7.51632e-12	1.25936e-10	16.6185	Down
BRWD1	-1.21794	3.82591	-6.43926	9.89123e-09	6.29091e-08	9.56304	Down
ABCA5	-1.21745	2.78052	-8.03268	9.70424e-12	1.57346e-10	16.3669	Down
KCTD15	-1.21738	1.82688	-6.26411	2.07886e-08	1.22096e-07	8.83611	Down
PLCB1	-1.21718	1.43946	-7.46569	1.16962e-10	1.29537e-09	13.9179	Down
YLPM1	-1.21713	3.81585	-7.69733	4.23853e-11	5.54812e-10	14.9161	Down
ZNF671	-1.21699	3.29479	-7.21801	3.44816e-10	3.33146e-09	12.8553	Down
EHMT2	-1.21685	3.47131	-5.39383	7.56795e-07	3.04441e-06	5.3303	Down
SLC14A1	-1.21675	2.98339	-4.17955	7.7521e-05	0.000209473	0.865133	Down
TECR	-1.21614	3.6537	-6.09912	4.16355e-08	2.25118e-07	8.15704	Down
JMJD7	-1.21584	1.60361	-8.35063	2.3911e-12	4.86134e-11	17.7463	Down
ZNF706	-1.21566	3.95397	-6.49911	7.66507e-09	5.02004e-08	9.81274	Down
STIM2	-1.21531	4.0408	-7.02288	8.05008e-10	6.9891e-09	12.0227	Down
SLC25A23	-1.21519	2.08517	-5.60257	3.24962e-07	1.41392e-06	6.15261	Down
TSPAN4	-1.21492	1.80387	-6.30209	1.77041e-08	1.05962e-07	8.99324	Down
ZNF92	-1.2149	2.81563	-5.62321	2.98717e-07	1.31355e-06	6.23461	Down
TM4SF19	-1.21482	0.965619	-7.44231	1.29559e-10	1.41912e-09	13.8173	Down
UPK3A	-1.21474	1.31582	-5.83091	1.27221e-07	6.09367e-07	7.0665	Down
ASPSCR1	-1.21454	2.19856	-6.87846	1.50383e-09	1.20108e-08	11.4094	Down
THG1L	-1.21433	2.31465	-5.67991	2.36878e-07	1.06313e-06	6.46053	Down
RPAP1	-1.21431	2.64967	-6.1449	3.43549e-08	1.8987e-07	8.34489	Down
SUGT1	-1.21385	2.76821	-7.49822	1.01445e-10	1.14903e-09	14.0578	Down
TOMM40	-1.21383	3.23748	-6.0161	5.893e-08	3.06602e-07	7.81765	Down
LLGL1	-1.21348	2.94905	-6.51045	7.30298e-09	4.80891e-08	9.86014	Down
NUP88	-1.21336	2.59486	-7.5815	7.04427e-11	8.41738e-10	14.4165	Down
UQCC2	-1.21309	2.50072	-5.94432	7.94839e-08	4.00038e-07	7.52549	Down
SMC5	-1.2128	4.19891	-6.50696	7.41251e-09	4.87346e-08	9.84556	Down
USP5	-1.21265	4.37026	-4.7133	1.08453e-05	3.4424e-05	2.75276	Down
ZFP30	-1.21255	1.2621	-9.94555	2.1704e-15	1.29582e-13	24.6504	Down
PTER	-1.21226	2.84471	-6.88069	1.48941e-09	1.19293e-08	11.4188	Down
IQCB1	-1.21217	3.83012	-5.87749	1.04909e-07	5.13226e-07	7.25462	Down
NOP9	-1.21186	4.02684	-5.67158	2.45103e-07	1.09685e-06	6.42728	Down
PARP1	-1.21183	3.52689	-5.7423	1.83345e-07	8.44096e-07	6.71017	Down
CWF19L2	-1.21177	3.73771	-7.45329	1.23484e-10	1.36226e-09	13.8645	Down
ENKUR	-1.21115	1.97716	-3.96465	0.000165146	0.00041957	0.144549	Down
ST8SIA6	-1.211	1.20532	-8.93015	1.85958e-13	5.42703e-12	20.2628	Down
ARHGEF3	-1.21089	5.06985	-6.66167	3.82382e-09	2.7083e-08	10.4942	Down
SPPL2B	-1.21087	3.46525	-5.12888	2.17297e-06	7.99064e-06	4.30671	Down
REEP6	-1.21018	0.924633	-9.1507	7.04638e-14	2.44833e-12	21.2194	Down
LRRC69	-1.21011	1.57859	-8.2156	4.33566e-12	7.8964e-11	17.1602	Down
NUDCD3	-1.20989	3.63567	-7.05079	7.13255e-10	6.27605e-09	12.1415	Down
ACBD4	-1.20949	2.86325	-6.33225	1.55817e-08	9.43435e-08	9.11819	Down
NLGN2	-1.20941	1.0866	-6.71568	3.03237e-09	2.20863e-08	10.7215	Down
ADPRM	-1.20876	3.64637	-8.04337	9.25822e-12	1.51738e-10	16.4133	Down
SHQ1	-1.20857	2.23223	-7.50843	9.70138e-11	1.10179e-09	14.1017	Down
MTPAP	-1.20832	2.38314	-7.58596	6.90783e-11	8.29526e-10	14.4357	Down
NUP107	-1.20776	3.05856	-6.8459	1.73081e-09	1.36121e-08	11.2715	Down
NEU3	-1.20774	3.1447	-6.19356	2.79959e-08	1.58391e-07	8.54501	Down
PCNT	-1.20751	2.91559	-6.73954	2.73668e-09	2.02104e-08	10.8221	Down
SLFN13	-1.20736	3.47249	-5.70341	2.15115e-07	9.76046e-07	6.55443	Down
RBM26	-1.20721	4.55853	-6.93582	1.17363e-09	9.68843e-09	11.6527	Down
P2RX5	-1.20706	3.31253	-4.46339	2.76453e-05	8.11695e-05	1.85255	Down
LPXN	-1.207	5.83459	-5.7323	1.91041e-07	8.75958e-07	6.67009	Down
DDX47	-1.20689	1.6923	-6.29858	1.79695e-08	1.07135e-07	8.97868	Down
GPR89B	-1.20661	2.49008	-7.22503	3.34428e-10	3.24218e-09	12.8854	Down
GRAP2	-1.20653	5.54932	-4.43097	3.11553e-05	9.05347e-05	1.73782	Down
ZNF569	-1.20652	1.6401	-9.52601	1.35695e-14	6.02316e-13	22.8433	Down
MMP28	-1.20648	0.755648	-11.9017	5.08353e-19	1.34682e-16	32.8878	Down
SRSF11	-1.20632	5.57165	-5.07693	2.66523e-06	9.59484e-06	4.10889	Down
LYNX1	-1.20568	0.727903	-8.90927	2.03867e-13	5.77091e-12	20.1722	Down
DENND4C	-1.20562	4.03762	-6.46011	9.05127e-09	5.81118e-08	9.64994	Down
ZNF623	-1.2055	3.42896	-7.16554	4.33258e-10	4.04533e-09	12.6311	Down
TLR7	-1.20532	2.75813	-4.36672	3.9432e-05	0.000112504	1.51188	Down
NAPEPLD	-1.20506	1.95579	-7.2065	3.62536e-10	3.4769e-09	12.8061	Down
RAP2A	-1.20504	3.87433	-6.06921	4.7193e-08	2.51241e-07	8.03461	Down
SSRP1	-1.20501	3.98498	-4.92392	4.83828e-06	1.65033e-05	3.53194	Down
IBA57	-1.20451	2.02785	-10.0496	1.37995e-15	8.79638e-14	25.0969	Down
ALG10B	-1.20428	1.64468	-8.34013	2.50445e-12	5.04646e-11	17.7007	Down
ARL6	-1.20426	1.13934	-10.8046	5.28955e-17	6.01944e-15	28.312	Down
YDJC	-1.20391	3.97142	-5.82653	1.29547e-07	6.19983e-07	7.04883	Down
TMCO4	-1.20345	3.29851	-5.87527	1.05879e-07	5.1713e-07	7.24564	Down
CLIP4	-1.20319	2.11476	-6.67582	3.59852e-09	2.5648e-08	10.5537	Down
PEX26	-1.20309	2.85667	-7.62799	5.74552e-11	7.10066e-10	14.6169	Down
TAS2R14	-1.20293	1.6428	-7.92329	1.57044e-11	2.38606e-10	15.8931	Down
LILRB1	-1.20256	4.6127	-3.87142	0.000227694	0.000564358	-0.160372	Down
ZNF287	-1.20242	1.01847	-11.5936	1.85019e-18	3.92148e-16	31.6157	Down
ARMCX5	-1.20227	1.83368	-7.60886	6.24829e-11	7.5784e-10	14.5344	Down
TBC1D32	-1.20208	1.47041	-8.3037	2.94067e-12	5.75774e-11	17.5426	Down
RBL2	-1.20186	6.73354	-6.7857	2.2436e-09	1.70137e-08	11.0169	Down
TRPC1	-1.20166	0.965593	-11.1592	1.16322e-17	1.61668e-15	29.8046	Down
SNX22	-1.20155	2.41341	-5.4098	7.09693e-07	2.87334e-06	5.39275	Down
CAPS	-1.20141	3.65427	-5.66751	2.49226e-07	1.11295e-06	6.41103	Down
ZNF790	-1.20135	1.41924	-9.23507	4.86323e-14	1.78487e-12	21.5849	Down
CASP8AP2	-1.20122	3.44662	-6.78052	2.29421e-09	1.73509e-08	10.9951	Down
ZNF846	-1.20115	2.08037	-9.059	1.05468e-13	3.45233e-12	20.8218	Down
ZNF570	-1.20106	1.55723	-10.3342	4.01524e-16	3.25753e-14	26.314	Down
TRAF3IP1	-1.20087	1.95408	-7.90458	1.70515e-11	2.56544e-10	15.8121	Down
SMAD5	-1.20078	2.74899	-6.94457	1.13005e-09	9.37383e-09	11.6898	Down
RPL35A	-1.2002	6.64222	-2.355	0.0211124	0.0364396	-4.34047	Down
MAGED1	-1.2	2.81278	-5.014	3.40924e-06	1.20131e-05	3.87053	Down
SCT	-1.2	0.724814	-8.89402	2.18025e-13	6.13072e-12	20.106	Down
NFATC1	-1.1999	3.3465	-7.54196	8.37656e-11	9.74163e-10	14.2461	Down
CRYL1	-1.19989	2.52073	-6.29928	1.7916e-08	1.06966e-07	8.9816	Down
TPM2	-1.19942	2.40207	-3.42679	0.000989884	0.00217895	-1.54538	Down
UBA5	-1.19919	2.7353	-5.63545	2.84143e-07	1.25526e-06	6.28332	Down
ZNF837	-1.19832	1.00191	-11.1808	1.06135e-17	1.51076e-15	29.8949	Down
IL12RB2	-1.19812	1.33964	-7.45962	1.20113e-10	1.32853e-09	13.8918	Down
TOP1MT	-1.19807	1.92525	-6.41088	1.11604e-08	7.01653e-08	9.44484	Down
TCTN2	-1.19777	1.1352	-9.54764	1.23429e-14	5.55134e-13	22.9367	Down
SEH1L	-1.19775	2.24824	-7.42301	1.40966e-10	1.52925e-09	13.7344	Down
PCCA	-1.19747	1.74977	-7.93674	1.48022e-11	2.26727e-10	15.9513	Down
ANKRD13C	-1.19743	3.07916	-7.25439	2.9428e-10	2.90274e-09	13.011	Down
SPRYD4	-1.19735	1.80224	-7.89273	1.79639e-11	2.67894e-10	15.7608	Down
CEP70	-1.19695	1.40801	-8.29259	3.08823e-12	6.01884e-11	17.4944	Down
SPTAN1	-1.19656	4.84199	-6.39742	1.18175e-08	7.3641e-08	9.38884	Down
TCAF1	-1.19647	1.61319	-8.88078	2.31116e-13	6.3824e-12	20.0486	Down
EIF3B	-1.19637	4.39964	-5.46167	5.75745e-07	2.37215e-06	5.59609	Down
IFT172	-1.19635	1.36828	-8.08181	7.81657e-12	1.30322e-10	16.5799	Down
SIPA1L3	-1.19632	3.38568	-6.05918	4.92171e-08	2.60382e-07	7.99358	Down
CCL4	-1.19619	4.4404	-3.46483	0.00087661	0.00194603	-1.43158	Down
SNRNP70	-1.19596	6.73762	-4.13566	9.0628e-05	0.000241656	0.716016	Down
PLXNA1	-1.19588	1.53933	-7.69722	4.2406e-11	5.54812e-10	14.9157	Down
MICU3	-1.19531	0.875827	-11.4813	2.97033e-18	5.47445e-16	31.1494	Down
CTC1	-1.19513	4.70492	-5.50292	4.87255e-07	2.03818e-06	5.75839	Down
UCKL1	-1.19507	3.85338	-5.25715	1.30753e-06	5.02392e-06	4.7993	Down
MRPL3	-1.19501	3.99539	-5.03631	3.12481e-06	1.10939e-05	3.95485	Down
ADK	-1.19465	3.16845	-5.93233	8.35465e-08	4.18498e-07	7.47683	Down
PDK2	-1.19453	2.72343	-6.98578	9.45406e-10	7.99517e-09	11.8649	Down
CLYBL	-1.19419	1.01362	-11.2092	9.40546e-18	1.39894e-15	30.0139	Down
CYP2R1	-1.19416	2.8142	-6.41398	1.1014e-08	6.93479e-08	9.45777	Down
SESN3	-1.19415	4.86985	-6.10279	4.09993e-08	2.2182e-07	8.17208	Down
ARMC1	-1.1939	3.52096	-6.24777	2.22745e-08	1.29789e-07	8.76858	Down
RTN4IP1	-1.19298	1.8748	-7.43458	1.3401e-10	1.45939e-09	13.7841	Down
SFRP5	-1.19293	0.738455	-9.72185	5.76016e-15	2.92423e-13	23.6881	Down
EIF2B5	-1.19262	3.63579	-5.57137	3.6902e-07	1.58689e-06	6.02884	Down
GNG7	-1.19251	3.20124	-5.46087	5.77616e-07	2.37835e-06	5.59294	Down
MAPKAPK5	-1.19234	2.70001	-7.69987	4.19159e-11	5.49672e-10	14.9271	Down
ASXL1	-1.19234	4.04499	-6.59049	5.18747e-09	3.54672e-08	10.1952	Down
PCBD2	-1.19232	2.14816	-7.57374	7.28791e-11	8.67184e-10	14.383	Down
TTC34	-1.19211	1.21836	-8.10648	7.01189e-12	1.19013e-10	16.6869	Down
ITPR1	-1.19206	2.84121	-6.32236	1.62484e-08	9.80104e-08	9.07719	Down
SDK2	-1.19199	0.982465	-8.71377	4.82396e-13	1.21719e-11	19.3234	Down
CCNB1IP1	-1.19157	2.63013	-5.68198	2.34873e-07	1.05581e-06	6.46881	Down
TMEM50B	-1.19149	3.83237	-5.78624	1.52993e-07	7.17478e-07	6.8866	Down
RGCC	-1.19113	5.20863	-5.04214	3.05438e-06	1.08597e-05	3.97692	Down
CD300E	-1.19095	5.46908	-2.71116	0.00829061	0.0154955	-3.50505	Down
POLR2M	-1.19018	2.41315	-6.86719	1.57885e-09	1.25626e-08	11.3616	Down
RPL27A	-1.19007	6.52837	-3.17625	0.00215854	0.00449191	-2.27155	Down
RNASEH1	-1.18988	2.8671	-6.28981	1.86485e-08	1.10794e-07	8.94239	Down
TOMM20	-1.18984	5.26264	-4.97853	3.91448e-06	1.36347e-05	3.73683	Down
TFB1M	-1.18975	2.45785	-6.79496	2.15586e-09	1.64735e-08	11.0561	Down
ITPRIPL1	-1.18958	2.1213	-5.6368	2.82589e-07	1.24911e-06	6.28866	Down
CDC14A	-1.18926	4.01648	-6.59023	5.19325e-09	3.54781e-08	10.1941	Down
CCDC25	-1.18914	2.9295	-5.53665	4.24951e-07	1.80498e-06	5.8915	Down
XKRX	-1.18911	0.954418	-10.4543	2.38874e-16	2.17761e-14	26.826	Down
GIPR	-1.18895	1.72815	-4.967	4.09381e-06	1.42039e-05	3.6935	Down
SPG7	-1.18884	3.21842	-7.27331	2.70979e-10	2.71075e-09	13.0921	Down
ZNF85	-1.18845	1.38241	-10.2775	5.13241e-16	4.02894e-14	26.072	Down
CRTAP	-1.18837	4.64376	-4.66765	1.28907e-05	4.02236e-05	2.58628	Down
NCL	-1.18812	5.34817	-3.68033	0.000433768	0.00102011	-0.770021	Down
TPD52	-1.18808	2.37269	-5.25	1.34524e-06	5.1513e-06	4.77171	Down
B3GLCT	-1.18786	1.72729	-8.84941	2.65367e-13	7.17634e-12	19.9124	Down
AGAP3	-1.18784	2.45077	-5.74701	1.79831e-07	8.29718e-07	6.72903	Down
ADM5	-1.18783	1.57025	-5.60771	3.18223e-07	1.38923e-06	6.17301	Down
CAAP1	-1.18778	3.02566	-6.95283	1.09036e-09	9.08344e-09	11.7249	Down
TMEM168	-1.18743	3.42149	-7.29498	2.46549e-10	2.49382e-09	13.1849	Down
URB2	-1.18705	2.21298	-6.94432	1.13129e-09	9.37548e-09	11.6887	Down
LZTS2	-1.18693	2.6913	-6.03492	5.44737e-08	2.85873e-07	7.89445	Down
AFG3L2	-1.18677	3.15908	-6.40246	1.15671e-08	7.24537e-08	9.4098	Down
MFSD12	-1.1864	4.17601	-6.04821	5.15292e-08	2.72021e-07	7.94873	Down
WBP11	-1.18634	4.36191	-5.81176	1.37699e-07	6.54015e-07	6.98931	Down
MRPL9	-1.18596	4.23869	-4.13641	9.03866e-05	0.000241088	0.718561	Down
GPATCH4	-1.18595	2.48659	-4.79283	8.01135e-06	2.60981e-05	3.04487	Down
DUS3L	-1.18555	3.09408	-5.11181	2.32395e-06	8.5016e-06	4.24162	Down
DIP2A	-1.18539	4.61093	-5.95039	7.75012e-08	3.91571e-07	7.55015	Down
QSOX2	-1.18525	3.08523	-5.80597	1.41032e-07	6.68346e-07	6.96598	Down
NELFCD	-1.18508	3.81206	-5.08712	2.56083e-06	9.26619e-06	4.14759	Down
DHX35	-1.18503	2.62536	-7.18669	3.95172e-10	3.74399e-09	12.7214	Down
LIMA1	-1.18501	2.04261	-7.04024	7.46637e-10	6.5325e-09	12.0966	Down
ELAC2	-1.18446	3.60862	-6.0925	4.28065e-08	2.30494e-07	8.12993	Down
DHX37	-1.18438	3.01807	-6.06358	4.83191e-08	2.56512e-07	8.01157	Down
VPS50	-1.18423	2.56087	-6.84762	1.71802e-09	1.35303e-08	11.2788	Down
ZNF554	-1.18416	1.55052	-8.87805	2.33918e-13	6.44928e-12	20.0367	Down
KLHL36	-1.18405	4.21723	-6.84349	1.74886e-09	1.37349e-08	11.2613	Down
ALDH18A1	-1.18395	3.46481	-4.83009	6.94579e-06	2.2913e-05	3.18263	Down
TAB1	-1.18349	3.96845	-5.95598	7.57178e-08	3.84163e-07	7.57288	Down
NR2C2AP	-1.18344	2.66919	-5.88593	1.01301e-07	4.97871e-07	7.28877	Down
DDI2	-1.18303	3.28888	-7.09101	5.9899e-10	5.3738e-09	12.313	Down
TMEM86A	-1.18286	1.20504	-10.4636	2.29412e-16	2.11409e-14	26.8658	Down
GEMIN4	-1.18255	2.58962	-6.46357	8.91874e-09	5.73696e-08	9.66438	Down
MPHOSPH10	-1.18233	2.93129	-5.91619	8.93433e-08	4.43344e-07	7.41135	Down
RPLP1	-1.18233	8.31369	-3.49602	0.000792986	0.00177456	-1.33759	Down
IMP3	-1.18197	4.12461	-5.16421	1.89022e-06	7.02864e-06	4.44182	Down
ARHGEF18	-1.1819	6.01874	-7.23014	3.27072e-10	3.17631e-09	12.9073	Down
PDCD5	-1.1818	3.6391	-3.90105	0.000205701	0.00051413	-0.0640081	Down
TMEM19	-1.18169	2.69345	-6.19936	2.73193e-08	1.55341e-07	8.56893	Down
ZNF512	-1.1815	3.56462	-6.75038	2.61205e-09	1.93914e-08	10.8678	Down
ALDH16A1	-1.18146	3.87013	-4.98653	3.79449e-06	1.32467e-05	3.76694	Down
DAGLA	-1.18117	1.03675	-8.07497	8.05547e-12	1.33779e-10	16.5503	Down
HIVEP2	-1.18102	4.42532	-6.16843	3.11196e-08	1.73688e-07	8.44158	Down
NAA30	-1.18092	2.80768	-7.51573	9.39615e-11	1.07143e-09	14.1332	Down
OTUD4	-1.18065	4.00768	-6.48156	8.26071e-09	5.36867e-08	9.73944	Down
C2CD2	-1.18063	1.8942	-7.53816	8.51714e-11	9.89155e-10	14.2298	Down
RTTN	-1.1806	1.59781	-7.36899	1.7849e-10	1.87514e-09	13.5024	Down
ASCC3	-1.18026	3.28822	-5.80224	1.43222e-07	6.774e-07	6.95096	Down
BAHD1	-1.18018	3.89842	-6.38022	1.27132e-08	7.8387e-08	9.31732	Down
NBPF1	-1.18012	1.48043	-9.08383	9.45543e-14	3.15023e-12	20.9295	Down
PAXBP1	-1.17979	3.96609	-5.80979	1.38823e-07	6.59164e-07	6.98138	Down
ZNF510	-1.17973	2.59621	-7.1878	3.93279e-10	3.73164e-09	12.7262	Down
NPC1	-1.17964	3.53706	-6.72638	2.89601e-09	2.12116e-08	10.7666	Down
UHRF2	-1.17963	4.25917	-6.4662	8.81924e-09	5.68157e-08	9.67537	Down
RGS9	-1.17928	1.49158	-6.67801	3.56491e-09	2.54405e-08	10.5629	Down
TSEN15	-1.17867	2.26555	-7.21323	3.52066e-10	3.3957e-09	12.8349	Down
SLC4A4	-1.17842	0.821847	-10.781	5.85497e-17	6.3639e-15	28.2119	Down
GPC2	-1.17811	1.6564	-7.01664	8.27081e-10	7.1551e-09	11.9962	Down
CAMK2N1	-1.17761	0.90276	-7.28047	2.62648e-10	2.63674e-09	13.1228	Down
CYB5RL	-1.17705	1.35734	-9.26291	4.30341e-14	1.60724e-12	21.7055	Down
EPB41L2	-1.17693	1.64246	-7.37269	1.75628e-10	1.84851e-09	13.5183	Down
KDM4C	-1.17688	3.95919	-6.6385	4.22323e-09	2.95295e-08	10.3968	Down
FTO	-1.17642	1.75735	-8.12273	6.52767e-12	1.11576e-10	16.7573	Down
CLEC17A	-1.17633	2.78693	-4.22632	6.55691e-05	0.000179466	1.02512	Down
CD200	-1.17632	1.70665	-5.7554	1.73723e-07	8.05483e-07	6.76272	Down
ZNF419	-1.17625	1.41795	-9.27846	4.0192e-14	1.5246e-12	21.7728	Down
NRROS	-1.17615	4.41505	-4.90818	5.14198e-06	1.74689e-05	3.4731	Down
TRMT11	-1.17595	2.18606	-7.2419	3.10738e-10	3.0332e-09	12.9576	Down
ORC5	-1.17589	2.54855	-6.65272	3.97349e-09	2.80027e-08	10.4565	Down
CMTR2	-1.17516	2.96642	-6.37318	1.30986e-08	8.05295e-08	9.28808	Down
MRPL39	-1.17507	3.5707	-5.66604	2.50731e-07	1.11908e-06	6.40516	Down
RBM4	-1.17494	3.68045	-6.52811	6.77256e-09	4.49454e-08	9.934	Down
MRPL38	-1.17477	1.94331	-5.96098	7.41583e-08	3.76814e-07	7.5932	Down
VMA21	-1.17471	3.77672	-6.52618	6.82857e-09	4.52639e-08	9.92594	Down
SMPD4	-1.17451	3.32305	-5.92819	8.49968e-08	4.24384e-07	7.46003	Down
MICAL3	-1.17441	1.6522	-7.25553	2.92811e-10	2.89498e-09	13.016	Down
ZNF587B	-1.17423	3.32711	-6.73705	2.76615e-09	2.03623e-08	10.8116	Down
TRMT10B	-1.17389	3.32882	-6.49583	7.77297e-09	5.08482e-08	9.79905	Down
SETBP1	-1.17389	2.03841	-6.415	1.09668e-08	6.90763e-08	9.46197	Down
LIG1	-1.17367	2.4507	-5.82339	1.31238e-07	6.27015e-07	7.03618	Down
TTLL1	-1.17363	2.15143	-7.67821	4.60951e-11	5.93913e-10	14.8336	Down
GPATCH8	-1.17326	4.36916	-7.35886	1.86566e-10	1.95152e-09	13.4589	Down
SPATC1L	-1.17274	1.98457	-6.18119	2.94923e-08	1.66037e-07	8.49409	Down
IFT80	-1.17264	2.03854	-7.48691	1.06592e-10	1.20251e-09	14.0092	Down
SPIN1	-1.17257	3.59889	-6.99224	9.1932e-10	7.83316e-09	11.8924	Down
LSM7	-1.17248	4.76497	-3.23553	0.0018009	0.0037985	-2.10346	Down
NF2	-1.17248	3.29853	-6.21113	2.59973e-08	1.48722e-07	8.61743	Down
AKAP5	-1.17215	0.960234	-7.10462	5.64629e-10	5.10606e-09	12.371	Down
ZNF571	-1.17207	1.07984	-10.9281	3.1181e-17	3.81325e-15	28.8329	Down
ZBTB42	-1.17154	1.7228	-7.68661	4.44267e-11	5.75038e-10	14.8699	Down
IL10RA	-1.17119	6.21726	-5.36697	8.43023e-07	3.36178e-06	5.22546	Down
PXMP4	-1.17073	2.07655	-7.7605	3.21205e-11	4.3781e-10	15.189	Down
RGS12	-1.17063	1.22444	-8.85288	2.61344e-13	7.09017e-12	19.9274	Down
SERPINH1	-1.17006	1.39803	-9.01958	1.25442e-13	3.9757e-12	20.6509	Down
PACRGL	-1.17001	1.87386	-8.47785	1.36474e-12	2.96674e-11	18.2988	Down
GNA12	-1.1699	3.8442	-7.59609	6.60799e-11	7.98042e-10	14.4793	Down
METTL3	-1.16981	4.06256	-5.46713	5.6319e-07	2.32516e-06	5.61753	Down
MRPS21	-1.16968	4.67383	-3.60918	0.000548725	0.00126416	-0.99157	Down
MAD1L1	-1.16962	1.71136	-8.09744	7.2966e-12	1.23106e-10	16.6477	Down
ZFAND1	-1.1696	3.07256	-5.90009	9.5523e-08	4.70976e-07	7.34608	Down
L3MBTL2	-1.16944	3.28222	-6.00444	6.18688e-08	3.20124e-07	7.77012	Down
SRSF10	-1.16891	4.41182	-5.77689	1.59009e-07	7.43153e-07	6.849	Down
SERPINB9	-1.16885	5.52076	-5.51838	4.57662e-07	1.9299e-06	5.81935	Down
FARS2	-1.16885	2.35798	-7.05425	7.02634e-10	6.19224e-09	12.1563	Down
METTL2B	-1.16868	2.38791	-6.94252	1.14011e-09	9.43487e-09	11.6811	Down
OSGEP	-1.16852	3.71517	-5.35926	8.69501e-07	3.45761e-06	5.19541	Down
ALKBH2	-1.16847	1.89549	-5.79855	1.45417e-07	6.8652e-07	6.93613	Down
LSM4	-1.16843	3.83864	-5.05509	2.90346e-06	1.03514e-05	4.02598	Down
KIAA1328	-1.16835	1.25419	-10.1643	8.38484e-16	5.99887e-14	25.5881	Down
MRPL1	-1.16827	3.28654	-5.14263	2.0583e-06	7.60362e-06	4.35925	Down
SSBP1	-1.16822	3.80065	-5.18323	1.75331e-06	6.56127e-06	4.51472	Down
MRRF	-1.16806	2.2443	-6.90296	1.35282e-09	1.09596e-08	11.5132	Down
RBM14	-1.16779	4.85808	-6.49433	7.8229e-09	5.11353e-08	9.79278	Down
THUMPD2	-1.16773	2.40142	-6.51491	7.16529e-09	4.72742e-08	9.87879	Down
MORC4	-1.16752	1.23919	-9.22064	5.18154e-14	1.88133e-12	21.5224	Down
RPS25	-1.16742	8.18865	-2.48522	0.015152	0.0268686	-4.04654	Down
KLHL20	-1.16708	3.28458	-7.02063	8.12894e-10	7.04674e-09	12.0131	Down
TTC14	-1.16699	4.83658	-6.26797	2.04527e-08	1.20292e-07	8.85205	Down
AMER1	-1.16687	1.62774	-8.10185	7.15618e-12	1.20977e-10	16.6668	Down
MMAB	-1.16687	1.53441	-8.70233	5.07332e-13	1.26691e-11	19.2737	Down
STK25	-1.16677	3.78183	-5.65158	2.66016e-07	1.18077e-06	6.34752	Down
YARS2	-1.16674	3.37444	-6.4729	8.571e-09	5.54977e-08	9.70333	Down
TIGD5	-1.16671	2.02014	-7.82372	2.43305e-11	3.47848e-10	15.4623	Down
CATSPER2	-1.16663	1.04513	-9.36735	2.72057e-14	1.10359e-12	22.1575	Down
BTN3A3	-1.16607	5.35999	-4.04647	0.000124149	0.000322468	0.416021	Down
DFFA	-1.16598	3.13184	-6.03497	5.44614e-08	2.85873e-07	7.89467	Down
EIF1AX	-1.16564	4.22164	-5.54699	4.07468e-07	1.73899e-06	5.93238	Down
TMTC4	-1.16505	2.28	-6.14111	3.49075e-08	1.92423e-07	8.3293	Down
SRSF7	-1.16501	5.63122	-4.41302	3.32809e-05	9.62496e-05	1.6745	Down
PIGM	-1.16493	2.57711	-6.40381	1.15008e-08	7.21179e-08	9.41543	Down
FBXW4	-1.16479	4.16032	-7.57538	7.23571e-11	8.61578e-10	14.3901	Down
ZNF286A	-1.16422	1.21438	-9.62576	8.768e-15	4.18789e-13	23.2739	Down
ELP6	-1.16367	2.90459	-6.52797	6.77685e-09	4.49563e-08	9.93338	Down
CACTIN	-1.16366	3.44702	-5.95517	7.59726e-08	3.8522e-07	7.5696	Down
BRD9	-1.16347	3.64937	-6.43244	1.01825e-08	6.45923e-08	9.53462	Down
TTC21B	-1.16315	1.80308	-8.20132	4.61729e-12	8.28474e-11	17.0983	Down
ATP6V0A2	-1.16286	2.69421	-7.9697	1.28042e-11	1.99916e-10	16.0941	Down
TVP23C	-1.16286	2.11788	-7.26102	2.85892e-10	2.83817e-09	13.0395	Down
GOLGA6L9	-1.16279	0.997982	-7.60207	6.43706e-11	7.7962e-10	14.5051	Down
ZNF362	-1.16268	3.86149	-6.50494	7.47663e-09	4.90991e-08	9.83712	Down
FAM185A	-1.16259	1.9474	-7.15982	4.44182e-10	4.13594e-09	12.6066	Down
GNB5	-1.16249	2.53626	-6.08533	4.41124e-08	2.36549e-07	8.10057	Down
ZNF417	-1.16248	3.43465	-6.90348	1.34975e-09	1.09452e-08	11.5155	Down
MAPK8	-1.16243	2.90622	-7.69292	4.32137e-11	5.61911e-10	14.8971	Down
FBXO44	-1.16233	3.55755	-4.42151	3.2259e-05	9.35335e-05	1.70442	Down
USP14	-1.16216	3.61826	-6.50519	7.46879e-09	4.90665e-08	9.83815	Down
OGFOD3	-1.16175	2.41302	-6.65895	3.86857e-09	2.73657e-08	10.4828	Down
BMPR1A	-1.16164	1.156	-10.2878	4.90671e-16	3.88777e-14	26.1164	Down
ZNF22	-1.16124	3.97227	-4.66308	1.31147e-05	4.08775e-05	2.56968	Down
EIF3F	-1.16121	4.12703	-5.66051	2.56472e-07	1.1417e-06	6.38311	Down
GPR55	-1.16118	1.85008	-5.07485	2.68706e-06	9.6611e-06	4.10099	Down
AHR	-1.16107	3.30461	-4.83014	6.94446e-06	2.2913e-05	3.18281	Down
LTB	-1.1608	7.588	-4.05545	0.000120296	0.00031313	0.446051	Down
CLUAP1	-1.16044	1.39147	-8.62589	7.10576e-13	1.68747e-11	18.9418	Down
RPL8	-1.15998	8.60205	-3.61113	0.000545213	0.00125692	-0.985526	Down
RUVBL1	-1.15944	2.56511	-6.24357	2.26728e-08	1.31793e-07	8.75125	Down
NPIPB15	-1.15869	1.86251	-5.14095	2.07197e-06	7.64576e-06	4.35284	Down
TAS2R20	-1.15834	1.53319	-6.66115	3.83223e-09	2.71312e-08	10.492	Down
TIMM9	-1.15834	3.40553	-5.10725	2.36607e-06	8.63892e-06	4.22422	Down
ZNF283	-1.15813	1.71209	-8.21275	4.3905e-12	7.95871e-11	17.1478	Down
SF3A2	-1.15804	5.08915	-6.39902	1.17375e-08	7.3215e-08	9.39548	Down
XPO5	-1.15798	2.98317	-6.04351	5.25518e-08	2.76987e-07	7.92954	Down
THNSL1	-1.15773	1.23368	-9.21275	5.36416e-14	1.93933e-12	21.4883	Down
SMDT1	-1.15746	5.11559	-4.33273	4.4632e-05	0.000126025	1.39319	Down
LBHD1	-1.15736	2.54312	-6.51875	7.04891e-09	4.65426e-08	9.89483	Down
TSGA10	-1.15723	1.39905	-10.6027	1.25948e-16	1.29428e-14	27.4569	Down
CDPF1	-1.15711	2.59819	-6.22366	2.46595e-08	1.4193e-07	8.66909	Down
NHP2	-1.15699	4.50214	-4.36083	4.02883e-05	0.000114792	1.49129	Down
GCC2	-1.15636	3.49772	-7.7431	3.46698e-11	4.66927e-10	15.1138	Down
ANKRD16	-1.15579	1.7639	-8.04327	9.26217e-12	1.51738e-10	16.4128	Down
SSTR3	-1.15577	1.73154	-5.75279	1.75605e-07	8.1221e-07	6.75221	Down
NIFK	-1.15576	3.56129	-5.29046	1.14499e-06	4.44062e-06	4.92814	Down
CMPK1	-1.15572	5.41794	-5.23486	1.42871e-06	5.43865e-06	4.7133	Down
KCNN4	-1.15529	3.23575	-4.77627	8.53465e-06	2.76382e-05	2.98381	Down
GFM1	-1.15502	2.69113	-7.21176	3.54323e-10	3.41552e-09	12.8286	Down
ENDOG	-1.15495	3.27143	-5.1061	2.37676e-06	8.67605e-06	4.21985	Down
TTC5	-1.15482	2.27666	-7.99591	1.14093e-11	1.8165e-10	16.2076	Down
ZNF805	-1.15478	2.47718	-7.70042	4.18154e-11	5.49519e-10	14.9294	Down
EMC1	-1.15473	2.41669	-5.93027	8.42653e-08	4.21476e-07	7.46847	Down
ABHD14A	-1.1546	1.49192	-7.77363	3.03199e-11	4.1831e-10	15.2457	Down
COPS7B	-1.15413	3.41888	-6.60661	4.84159e-09	3.33309e-08	10.2629	Down
QDPR	-1.15356	2.49552	-5.9478	7.83412e-08	3.94991e-07	7.53963	Down
[truncated: 5,557 more rows]

## Sheet: Table S2
Table S2. List of 3313 hub genes identified in the turquoise module.
x
AAK1
AAR2
AARS2
AARSD1
AASDH
AASDHPPT
ABCA3
ABCA5
ABCB1
ABCB4
ABCB7
ABCB8
ABCC1
ABCC10
ABCD2
ABCD3
ABCD4
ABCE1
ABCF2
ABHD10
ABHD12
ABHD14A
ABHD14B
ABHD15
ABHD6
ABI2
ABI3
ABL1
ABLIM1
ABT1
ACACA
ACACB
ACAD9
ACADM
ACADSB
ACBD4
ACBD6
ACKR3
ACO1
ACOT2
ACOT4
ACP1
ACSF2
ACSF3
ACSS1
ACTR1B
ACTR5
ACTR6
ACTR8
ACVR2A
ACVR2B
ACYP1
ADA
ADAM28
ADAMTS1
ADAMTS10
ADARB1
ADAT1
ADAT2
ADCK1
ADCK2
ADCY9
ADGRG1
ADGRG5
ADGRL1
ADHFE1
ADK
ADM5
ADNP
ADNP2
ADO
ADPRM
ADRB2
ADSL
AEBP1
AEBP2
AFAP1
AFF3
AFG3L2
AGAP1
AGAP3
AGAP4
AGAP6
AGFG2
AGK
AGL
AGMAT
AGO3
AGPAT4
AGPAT5
AHCYL2
AHDC1
AHNAK
AIDA
AIFM2
AIMP1
AK1
AK3
AK5
AKAP1
AKAP11
AKAP12
AKAP5
AKAP7
AKAP8
AKAP9
AKR1B1
AKR1C3
AKT3
ALDH1A1
ALDH1B1
ALDH3A2
ALDH5A1
ALDH6A1
ALDOC
ALG1
ALG10
ALG10B
ALG13
ALG5
ALG8
ALKBH2
ALKBH3
ALKBH8
ALMS1
ALOX5AP
ALS2CL
AMER1
AMIGO1
AMMECR1
AMN
AMY2B
ANAPC1
ANAPC16
ANAPC2
ANAPC5
ANGEL1
ANGEL2
ANGPTL6
ANK3
ANKAR
ANKEF1
ANKH
ANKIB1
ANKMY1
ANKRA2
ANKRD10
ANKRD13C
ANKRD16
ANKRD17
ANKRD22
ANKRD26
ANKRD36
ANKRD36B
ANKRD36C
ANKRD40
ANKRD46
ANKS3
ANKS6
ANO9
ANXA2R
ANXA3
AP1AR
AP3M2
AP4B1
AP4S1
AP5S1
APBA2
APBB1
API5
APOBEC3D
APOL3
APOOL
APPL1
APRT
AQR
ARFGEF2
ARFRP1
ARG1
ARHGAP10
ARHGAP12
ARHGAP17
ARHGAP32
ARHGAP35
ARHGAP5
ARHGEF10L
ARHGEF18
ARHGEF3
ARHGEF7
ARHGEF9
ARIH2
ARL1
ARL10
ARL14EP
ARL2BP
ARL4C
ARL5A
ARL6
ARL6IP4
ARMC1
ARMC6
ARMCX2
ARMCX5
ARPIN
ARPP19
ARRB1
ARRDC2
ARSK
ARVCF
ASB1
ASB13
ASCC3
ASF1A
ASPH
ASPSCR1
ASTE1
ASXL1
ATAD1
ATAD3B
ATF7IP2
ATG14
ATG16L1
ATG2B
ATG4C
ATG9B
ATIC
ATL2
ATM
ATN1
ATP10A
ATP2B1
ATP6V0A2
ATP6V0E2
ATP8A1
ATP8B2
ATPAF1
ATPAF2
ATR
ATRN
ATXN10
ATXN7L1
ATXN7L2
ATXN7L3B
AUTS2
AVEN
AXIN2
B3GALNT2
B3GALT6
B3GAT1
B3GLCT
B3GNT5
B3GNT7
B4GALT7
B4GAT1
BACH2
BAG3
BAG5
BAHD1
BANK1
BATF3
BAZ1B
BBS2
BBS4
BCAS4
BCAT2
BCKDHB
BCL11A
BCL11B
BCL2
BCL3
BCL7A
BCL7C
BCL9L
BCLAF1
BCOR
BDH1
BDH2
BDP1
BEND5
BET1
BET1L
BICD1
BIN1
BIRC3
BIVM
BLCAP
BLK
BLMH
BLOC1S4
BMI1
BMP1
BMPR1A
BMS1
BMX
BNIP3
BOD1
BOK
BORA
BPHL
BPTF
BRD1
BRD9
BRF1
BRIX1
BRWD1
BTAF1
BTBD2
BTD
BTF3L4
BTLA
BTRC
BUB3
BZW2
C10orf88
C11orf21
C11orf58
C11orf80
C12orf29
C12orf42
C12orf43
C15orf40
C16orf74
C17orf67
C17orf75
C19orf12
C1QTNF6
C1orf109
C1orf159
C1orf174
C1orf21
C1orf50
C2CD2
C2orf42
C3orf18
C5orf24
C5orf63
C7orf31
C7orf50
C8orf33
CA4
CA5B
CAAP1
CABIN1
CACNA1I
CACNA2D2
CACNA2D3
CACNB1
CACTIN
CAD
CAMK1
CAMK2D
CAMK2N1
CAMK4
CAMSAP1
CAND1
CAPN10
CAPN15
CAPN5
CAPN7
CAPRIN2
CAPS
CARD11
CARF
CARNMT1
CARNS1
CASD1
CASK
CASP8AP2
CATSPER2
CBFA2T2
CBFB
CBLB
CBR3
CBR4
CBX5
CBX6
CBX7
CBY1
CC2D1B
CCAR1
CCAR2
CCDC102A
CCDC106
CCDC120
CCDC134
CCDC136
CCDC14
CCDC152
CCDC25
CCDC50
CCDC57
CCDC6
CCDC61
CCDC65
CCDC66
CCDC71L
CCDC86
CCDC88C
CCDC91
CCDC92
CCL28
CCNB1IP1
CCND2
CCNJ
CCNT1
CCNT2
CCR4
CCR6
CCR7
CCSER2
CD160
CD177
CD1C
CD2
CD200
CD200R1
CD22
CD226
CD244
CD247
CD248
CD27
CD28
CD2AP
CD3D
CD3E
CD3G
CD4
CD40LG
CD47
CD5
CD55
CD6
CD7
CD79B
CD81
CD84
CD8A
CD8B
CD96
CDA
CDAN1
CDC14A
CDC16
CDC23
CDC25B
CDC42SE2
CDHR3
CDIP1
CDK10
CDK20
CDK5RAP1
CDK6
CDKAL1
CDKN1C
CDKN2AIP
CDNF
CDPF1
CDR2
CDYL
CEACAM1
CEACAM21
CEBPB
CEBPD
CELSR2
CENPB
CENPC
CENPK
CENPV
CEP104
CEP120
CEP126
CEP164
CEP250
CEP290
CEP44
CEP57
CEP68
CEP70
CEP72
CEP78
CEP83
CEP85L
CEP95
CERK
CFAP36
CFAP44
CFAP97
CFL2
CHCHD3
CHCHD6
CHD3
CHD6
CHD9
CHEK2
CHIC1
CHID1
CHM
CHML
CHMP7
CHORDC1
CHST12
CHST14
CIAPIN1
CIITA
CIRBP
CISD3
CKAP4
CLASP2
CLCC1
CLCF1
CLDND2
CLEC10A
CLEC2D
CLEC4D
CLEC4E
CLIC3
CLIP4
CLN8
CLNS1A
CLOCK
CLSTN1
CLUAP1
CLYBL
CMC1
CMKLR1
CMPK1
CMTM2
CMTR2
CNNM3
CNNM4
CNOT1
CNOT11
CNOT2
CNOT6L
CNOT7
CNPY2
CNR2
CNTNAP1
CNTRL
COA4
COA5
COG1
COG2
COG3
COG5
COG6
COIL
COL19A1
COL5A3
COL6A1
COL6A2
COLGALT2
COLQ
COMMD10
COPS7B
COPS8
COPZ2
COQ10A
COQ4
COQ6
COQ9
COX10
COX11
COX18
COX19
COX20
CPA3
CPOX
CPSF6
CR2
CRACR2A
CREB3L4
CREBL2
CREBZF
CRIM1
CRIP1
CRIP2
CROCC
CROT
CRTAM
CRTC1
CRTC3
CRY1
CRY2
CRYBG3
CRYGS
CRYL1
CRYZ
CRYZL1
CSE1L
CSF1R
CSNK1E
CSTF2
CSTF2T
CSTF3
CTBP1
CTC1
CTDSPL2
CTNNBL1
CTPS1
CTPS2
CTSF
CTSO
CTSW
CTU2
CUL1
CUL4A
CUL5
CUL9
CWF19L2
CX3CR1
CXCR5
CXCR6
CXXC5
CYB561
CYB561D1
CYB5A
CYB5B
CYB5RL
CYFIP2
CYLD
CYP20A1
CYP2R1
CYP2S1
CYP2U1
CYP4F22
CYP4V2
CYSLTR2
CYSTM1
CYTH1
CYTH3
D2HGDH
DAAM2
DACH1
DAG1
DAGLA
DAZAP1
DBNDD1
DBP
DBR1
DBT
DCAF13
DCAF16
DCAF17
DCAF4
DCAF7
DCAF8
DCAKD
DCHS1
DCK
DCP1B
DCTD
DCUN1D2
DCUN1D4
DDB1
DDB2
DDHD1
DDHD2
DDI2
DDIAS
DDR1
DDX1
DDX17
DDX18
DDX19A
DDX19B
DDX24
DDX28
DDX31
DDX46
DDX47
DDX50
DDX51
DDX54
DDX55
DDX56
DDX6
DENND2D
DENND4C
DENND6A
DET1
DEXI
DFFA
DFFB
DGCR6L
DGCR8
DGKA
DGKE
DGKQ
DHODH
DHPS
DHRS3
DHRS9
DHX15
DHX30
DHX32
DHX35
DHX36
DHX37
DHX57
DHX9
DIDO1
DIMT1
DIP2A
DIP2C
DIS3
DIS3L
DIS3L2
DLAT
DLEC1
DLG1
DLG3
DLG5
DMPK
DMTF1
DMWD
DNAAF2
DNAAF5
DNAH1
DNAJA3
DNAJA4
DNAJB14
DNAJC10
DNAJC11
DNAJC17
DNAJC19
DNAJC2
DNAJC21
DNAJC24
DNAJC30
DNHD1
DNM1L
DNMT1
DNMT3A
DNPEP
DOCK10
DOCK9
DPH1
DPH2
DPH5
DPH7
DPP4
DPY19L4
DRAXIN
DRG2
DROSHA
DSC1
DTD2
DTHD1
DTX1
DTX3
DUS3L
DUSP14
DUSP7
DVL1
DVL2
DYM
DYNC1H1
DYRK1B
DYRK2
DZIP3
E2F6
EARS2
EBAG9
EBF1
EBF4
ECHDC2
ECHDC3
ECI2
ECSIT
EDAR
EDC3
EDRF1
EEA1
EED
EEF1E1
EEF2
EEF2K
EEF2KMT
EEFSEC
EFCAB13
EFCAB14
EFNB1
EHBP1
EHMT1
EHMT2
EI24
EID2B
EIF1AX
EIF2AK4
EIF2B3
EIF2B5
EIF2D
EIF2S3
EIF3B
EIF3E
EIF3F
EIF3L
EIF4B
ELAC1
ELAC2
ELAVL1
ELK4
ELOVL6
ELP2
ELP3
ELP6
EMC1
EMC10
EME2
EMG1
EML4
EML5
ENDOG
ENG
ENGASE
ENHO
ENO2
ENOPH1
ENOSF1
ENOX2
ENPP5
ENTPD6
EOMES
EP400
EPAS1
EPB41L2
EPC1
EPHA1
EPHA4
EPHB6
EPHX2
EPM2AIP1
EPN2
ERAP1
ERAP2
ERBB2
ERCC1
ERCC2
ERCC3
ERCC5
ERI3
ERMARD
ERMP1
ESF1
ESYT1
ESYT2
ETAA1
ETNK1
ETS1
ETS2
EVA1C
EVL
EXD2
EXD3
EXO5
EXOC2
EXOC6B
EXOG
EXOSC10
EXOSC2
EXOSC4
EXOSC5
EXOSC6
EXOSC7
EXOSC8
EXOSC9
EXT2
EXTL2
F5
FAAH
FAAH2
FAAP100
FAF1
FAHD2A
FAHD2B
FAM110A
FAM117B
FAM120C
FAM133B
FAM135A
FAM153A
FAM162A
FAM167A
FAM167B
FAM168B
FAM169A
FAM171A1
FAM185A
FAM199X
FAM20B
FAM210A
FAM216A
FAM24B
FAM3C
FAM50B
FAM53B
FAM76A
FAM78A
FAM83G
FAM98B
FAN1
FANCD2
FANCF
FAR2
FARP2
FARS2
FARSB
FASLG
FASTKD1
FASTKD2
FBF1
FBLN2
FBRSL1
FBXL14
FBXL16
FBXL17
FBXO2
FBXO21
FBXO22
FBXO25
FBXO31
FBXO32
FBXO4
FBXO41
FBXW4
FBXW8
FBXW9
FCAR
FCER1A
FCER2
FCGBP
FCGR1A
FCMR
FCRL3
FCRL6
FCRLA
FDX1
FFAR3
FGD6
FGF13
FGFBP2
FGFBP3
FGFRL1
FHIT
FIGNL1
FITM2
FKTN
FLT3LG
FLT4
FLYWCH1
FMNL3
FMO4
FN3KRP
FNBP1
FNBP4
FNTA
FOLR2
FOXJ3
FOXK1
FOXN3
FOXO1
FOXP3
FOXP4
FPGS
FRA10AC1
FRMPD3
FSBP
FTO
FUBP1
FUBP3
FUOM
FUT11
FUT7
FXN
FXYD7
FYCO1
FYN
FYTTD1
G2E3
G3BP1
GABPB2
GAL3ST4
GALNT11
GALNT12
GALNT14
GALNT6
GALT
GAMT
GAN
GANC
GATA2
GATA3
GATAD1
GATC
GCA
GCC2
GCDH
GCFC2
GCLC
GCN1
GCNT4
GCSAM
GDF11
GDPD5
GEMIN2
GEMIN4
GEMIN5
GEMIN8
GFM1
GGA2
GGACT
GGT7
GIMAP1
GIMAP5
GIMAP6
GIPC1
GIT1
GK5
GLG1
GLI4
GLMN
GLOD4
GLRX3
GLS
GLUD1
GLYCTK
GMPS
GNA12
GNB5
GNE
GNG7
GNGT2
GNL3L
GNLY
GNPDA2
GNPNAT1
GNPTAB
GOLGA3
GOLGA4
GOLGA6L9
GOLGA7B
GOLGA8A
GOLGA8B
GOLGA8N
GOLT1B
GON4L
GOPC
GORASP2
GOSR2
GPA33
GPALPP1
GPATCH1
GPATCH11
GPATCH2
GPATCH8
GPC2
GPD1L
GPN2
GPR15
GPR153
GPR160
GPR171
GPR174
GPR18
GPR180
GPR183
GPR55
GPR68
GPR75
GPR84
GPR89A
GPR89B
GPRASP1
GPRIN3
GPSM1
GPX7
GRAP
GRB10
GRINA
GRPEL2
GRSF1
GRWD1
GSAP
GSDMB
GSE1
GSN
GSPT2
GSTM2
GSTM3
GTF2H1
GTF2H3
GTF2I
GTF2IRD2B
GTF3C1
GTF3C2
GTF3C3
GTF3C4
GTPBP10
GTPBP3
GTPBP4
GTPBP6
GTPBP8
GUF1
GXYLT1
GYG1
GZMK
GZMM
HABP4
HACD2
HACD3
HACE1
HACL1
HADH
HAGHL
HAPLN3
HAUS3
HAUS5
HAUS6
HCFC2
HDAC9
HDC
HDDC2
HDHD2
HEATR1
HEATR5B
HEATR6
HEATR9
HECTD1
HEG1
HELQ
HELZ
HEMK1
HERC1
HERC2
HEXA
HGD
HGH1
HGSNAT
HIBADH
HIBCH
HIC2
HIF1AN
HIP1
HIP1R
HIVEP2
HIVEP3
HKDC1
HLCS
HLTF
HLX
HMBOX1
HMG20A
HMGXB3
HMOX2
HNRNPR
HNRNPU
HOOK1
HOPX
HOXB2
HOXB3
HOXB4
HP
HP1BP3
HPCAL4
HPS4
HSCB
HSD17B7
HSD17B8
HSF2
HTT
HUS1
HUWE1
HVCN1
IBA57
IBTK
ICAM2
ICE1
ICE2
ICOS
ID3
IDH3A
IDUA
IFFO2
IFNGR2
IFRD2
IFT172
IFT27
IFT74
IFT80
IGFBP3
IGFBP4
IGIP
IGSF8
IGSF9B
IKBKB
IKBKE
IKZF1
IKZF2
IKZF3
IL10RA
IL11RA
IL12RB2
IL18BP
IL1R1
IL1R2
IL1RN
IL21R
IL23A
IL2RA
IL2RB
IL32
IL4I1
IL7R
ILF3
ILKAP
ILVBL
IMMP1L
IMMP2L
IMMT
IMP3
IMPA2
IMPACT
IMPDH2
ING5
INO80
INPP4A
INPP4B
INPP5B
INPP5E
INPP5F
INTS10
INTS2
INTS9
INVS
IPCEF1
IPO5
IPO7
IPO9
IQCB1
IRAK3
IREB2
IRF2BP1
IRF8
ITFG2
ITGA4
ITGA6
ITGA7
ITGB1BP1
ITK
ITPA
ITPKB
ITPR1
ITPR3
ITPRIPL1
IVD
JADE1
JADE2
JAK1
JAKMIP2
JMJD4
JMJD7
JMJD8
JMY
JRK
KANK3
KANSL2
KANSL3
KANTR
KAT2A
KAT6B
KCNA3
KCNC3
KCNE1
KCNG1
KCNH8
KCNIP2
KCTD13
KCTD15
KCTD17
KCTD7
KDM1A
KDM2B
KDM4C
KDM8
KDSR
KHDRBS1
KIAA0586
KIAA1143
KIAA1191
KIAA1328
KIAA1586
KIAA1671
KIAA2026
KIF16B
KIF20B
KIF21A
KIF22
KIF2A
KIF3A
KIR2DL1
KIR2DL3
KIR3DL1
KIR3DL2
KIZ
KLC2
KLF12
KLF8
KLHDC1
KLHDC4
KLHL11
KLHL20
KLHL22
KLHL3
KLHL36
KLHL42
KLRB1
KLRC1
KLRC2
KLRC3
KLRC4
KLRD1
KLRF1
KLRG1
KLRK1
KMO
KMT2A
KNOP1
KPNA5
KRBA1
KRBOX4
KRR1
KRT72
KRT73
L3HYPDH
L3MBTL2
L3MBTL3
LACTB2
LANCL1
LARS2
LAS1L
LAT
LATS1
LAX1
LBH
LBHD1
LCK
LCMT1
LCNL1
LDAH
LDHB
LDLRAP1
LDOC1
LEF1
LEO1
LEPROTL1
LETM1
LETMD1
LFNG
LGALS2
LGMN
LGR6
LHPP
LIG1
LIG3
LILRA4
LILRA5
LILRA6
LIM2
LIMA1
LIMD1
LIN52
LIN7C
LIPE
LIPT1
LIPT2
LIX1L
LLGL1
LLGL2
LMBRD2
LMF1
LMO7
LMTK3
LNPEP
LNX2
LONP1
LONP2
LOXL1
LPAR5
LPIN1
LPXN
LRBA
LRCH1
LRCH3
LRFN3
LRIG1
LRIG2
LRPPRC
LRRC14
LRRC24
LRRC40
LRRC47
LRRC56
LRRC58
LRRC69
LRRC75A
LRRC8C
LRRCC1
LRRN3
LSG1
LSM11
LSM8
LSR
LSS
LTB4R2
LTBP3
LTBP4
LTK
LUC7L
LUC7L3
LUZP1
LY9
LYNX1
LYPD2
LYPLAL1
LYRM2
LYRM4
LYRM7
LYSMD4
LZTS2
LZTS3
MAB21L3
MACROD1
MAD1L1
MADD
MAF
MAGEE1
MAGOHB
MAK16
MAL
MALT1
MAML2
MAN1A2
MAN1C1
MAN2A1
MAP2K5
MAP3K10
MAP3K14
MAP3K4
MAP3K9
MAP4K1
MAP4K3
MAP4K5
MAP7D3
MAP9
MAPK8
MAPK9
MAPKAPK5
MAPKBP1
MAPRE2
MARS2
MATK
MBD3
MBIP
MBLAC2
MBNL1
MBNL2
MBTD1
MBTPS1
MBTPS2
MC1R
MCCC1
MCCC2
MCEE
MCEMP1
MCM3AP
MCOLN2
MCTS1
MDC1
MDFIC
MDM4
MDN1
ME3
MEAF6
MECP2
MECR
MED1
MED14
MED15
MED27
MED28
MEF2C
MEGF6
MEGF8
MEN1
MEST
METAP1
METAP1D
METRN
METTL1
METTL15
METTL16
METTL21A
METTL2A
METTL2B
METTL3
METTL8
MEX3C
MFHAS1
MFNG
MFSD12
MFSD3
MFSD6
MFSD8
MGA
MGAT4A
MGAT5
MGMT
MIB1
MICAL3
MICU3
MID2
MIEF1
MIER3
MIPEP
MIS12
MIS18BP1
MLH1
MLH3
MLLT10
MLLT11
MLLT3
MLLT6
MMAB
MMP28
MMP9
MMS19
MNAT1
MOCS2
MORC2
MORC4
MORN3
MPHOSPH10
MPHOSPH6
MPHOSPH9
MPI
MPRIP
MPV17
MRI1
MRM1
MRPL1
MRPL19
MRPL2
MRPL30
MRPL38
MRPL39
MRPL42
MRPL48
MRPL50
MRPS14
MRPS16
MRPS17
MRPS18B
MRPS25
MRPS27
MRPS28
MRPS30
MRPS6
MRPS9
MRRF
MRS2
MS4A1
MS4A2
MS4A7
MSANTD2
MSANTD4
MSH2
MSI2
MSTO1
MTA1
MTA3
MTAP
MTERF1
MTERF2
MTERF3
MTERF4
MTF2
MTG1
MTHFSD
MTMR1
MTMR12
MTMR8
MTMR9
MTO1
MTOR
MTPAP
MTR
MTSS1
MTX3
MXD3
MXD4
MXRA8
MYBBP1A
MYBL1
MYC
MYCBP2
MYCL
MYEF2
MYH3
MYO10
MYO19
MYO1E
MYO6
MYO9A
MZF1
MZT2A
N4BP2
N4BP2L1
N4BP3
N6AMT1
NAA15
NAA16
NAA25
NAA30
NAA35
NAA40
NAAA
NAB2
NADK2
NAE1
NAF1
NAP1L2
NAP1L3
NAP1L4
NAPEPLD
NAT10
NATD1
NBPF1
NBPF11
NBPF12
NBPF15
NBPF3
NBPF8
NCALD
NCAM1
NCAPD3
NCBP1
NCBP2
NCOA5
NCR3
NCR3LG1
NDC1
NDRG2
NDUFA10
NDUFA11
NDUFAF4
NDUFV3
NECAP2
NEIL2
NEK3
NELFA
NELFCD
NELL2
NEMP1
NEMP2
NEO1
NEU3
NEURL1
NEURL4
NF2
NFATC1
NFATC2
NFATC2IP
NFATC3
NFE2
NFE2L3
NFIL3
NFX1
NHLRC2
NHLRC3
NIF3L1
NIFK
NIPA1
NIPAL3
NIPSNAP1
NIT2
NKRF
NKTR
NLE1
NLGN2
NLRC3
NLRC4
NLRP12
NLRP2
NMRAL1
NMT2
NMUR1
NNT
NOA1
NOB1
NOC3L
NOG
NOL11
NOL4L
NOL6
NOL8
NOL9
NOLC1
NOM1
NOP14
NOP58
NOP9
NOSIP
NOXA1
NPAT
NPC1
NPIPA1
NPIPB15
NPIPB3
NPIPB4
NPIPB5
NPTXR
NQO2
NR1D1
NR1D2
NR2C1
NR2C2
NR2C2AP
NR3C2
NRCAM
NSMCE4A
NSMF
NSUN2
NSUN4
NSUN6
NSUN7
NT5DC1
NT5E
NTMT1
NTN4
NUBP2
NUCKS1
NUDCD1
NUDCD2
NUDCD3
NUDT13
NUDT14
NUDT3
NUDT7
NUDT8
NUDT9
NUMA1
NUP107
NUP133
NUP155
NUP160
NUP188
NUP205
NUP210
NUP35
NUP43
NUP62
NUP85
NUP88
NUP93
NVL
OARD1
OBSCN
OCIAD2
OCM
ODC1
ODF2
ODF2L
OFD1
OGFOD1
OGFOD3
OGG1
OGT
OLAH
OLFM2
OPA3
OPLAH
OPTN
ORC2
ORC3
ORC5
ORMDL3
OSBPL10
OSBPL3
OSBPL5
OSBPL7
OSGEP
OSGEPL1
OTUD3
OTUD4
OTUD6B
OTUD7B
OTULIN
OVGP1
OXCT1
OXNAD1
P2RY10
P2RY11
P2RY8
P3H4
P4HTM
PAAF1
PABPC1
PABPC4
PACRGL
PACS1
PACS2
PACSIN1
PADI2
PADI4
PAFAH2
PAIP2B
PALB2
PALLD
PANK3
PANK4
PAOX
PAQR7
PAQR8
PARP1
PARP15
PARP16
PASK
PATZ1
PAX5
PAXBP1
PBRM1
PBX4
PCBD2
PCBP4
PCCA
PCCB
PCDH9
PCED1A
PCED1B
PCGF5
PCGF6
PCID2
PCM1
PCMTD2
PCNT
PCSK5
PCSK7
PCYOX1
PCYOX1L
PCYT2
PDCD11
PDCD2
PDCD2L
PDCD4
PDCD6
PDCD7
PDE4DIP
PDE6B
PDE7A
PDE8A
PDGFB
PDGFD
PDHX
PDIK1L
PDK2
PDP1
PDP2
PDPR
PDS5A
PDSS2
PDXDC1
PDZD4
PEA15
PEBP1
PELO
PELP1
PEMT
PER3
PEX1
PEX10
PEX14
PEX26
PEX3
PEX5
PFAS
PFKFB2
PFKFB3
PGAP3
PGBD2
PGD
PGLYRP1
PGRMC2
PHACTR4
PHC1
PHC2
PHC3
PHF10
PHF14
PHF19
PHF6
PHF7
PHLDB2
PHLDB3
PHLPP2
PHOSPHO2
PHRF1
PHTF2
PHYH
PI16
PI4KA
PIBF1
PID1
PIEZO1
PIGF
PIGG
PIGK
PIGL
PIGM
PIGO
PIGP
PIGU
PIGW
PIK3C2B
PIK3IP1
PIK3R1
PILRB
PINX1
PIP4K2B
PIP5K1C
PITPNC1
PITPNM2
PITRM1
PJA1
PKD1
PKD2
PKIA
PLA2G6
PLA2G7
PLAG1
PLCB1
PLCD1
PLCG1
PLCH2
PLCXD2
PLD4
PLEKHA1
PLEKHA8
PLEKHB1
PLEKHF1
PLEKHG4
PLEKHG5
PLXDC1
PLXNA1
PLXNA3
PLXND1
PM20D2
PMEPA1
PMM2
PMS1
PNMA3
PNPLA1
PNPLA4
PNPLA7
PNPO
POC5
PODXL2
POFUT1
POGK
POGLUT1
POLD2
POLG
POLG2
POLH
POLI
POLM
POLR1A
POLR1B
POLR1C
POLR1E
POLR2B
POLR2D
POLR2M
POLR3A
POLR3B
POLR3D
POLR3E
POLR3H
POLRMT
POM121
POM121C
POMGNT1
POMK
POMT1
PON2
POP5
POPDC2
[truncated: 1,315 more rows]

## Sheet: Table S3
Table S3. Gene Ontology enrichment analysis of the 39-gene PANoptosis set.
ONTOLOGY	ID	Description	GeneRatio	BgRatio	pvalue	p.adjust	qvalue	geneID	Count
BP	GO:0043276	anoikis	6/39	35/18614	8.77827e-11	1.66348e-07	1.00165e-07	BCL2/MYBBP1A/ZNF304/ANKRD13C/MTOR/CHEK2	6
BP	GO:0018105	peptidyl-serine phosphorylation	10/39	309/18614	5.70748e-10	5.40783e-07	3.25627e-07	PRKCQ/PRKACB/BCL2/ATM/PRKX/AKT3/MAPK8/MTOR/IKBKB/CHEK2	10
BP	GO:0018209	peptidyl-serine modification	10/39	327/18614	9.87816e-10	6.23971e-07	3.75717e-07	PRKCQ/PRKACB/BCL2/ATM/PRKX/AKT3/MAPK8/MTOR/IKBKB/CHEK2	10
BP	GO:2000209	regulation of anoikis	5/39	25/18614	1.59426e-09	6.44564e-07	3.88117e-07	BCL2/MYBBP1A/ZNF304/ANKRD13C/CHEK2	5
BP	GO:0070231	T cell apoptotic process	6/39	56/18614	1.7007e-09	6.44564e-07	3.88117e-07	PRKCQ/BCL2/FASLG/TP53/DFFA/CHEK2	6
BP	GO:0022411	cellular component disassembly	11/39	488/18614	3.10392e-09	9.80321e-07	5.90289e-07	EXOG/CHMP7/TP53/SPTAN1/DFFA/ENDOG/PIK3R1/DFFB/DNM1L/GSN/IRAK3	11
BP	GO:0006308	DNA catabolic process	5/39	33/18614	7.03541e-09	1.90459e-06	1.14682e-06	EXOG/ATM/DFFA/ENDOG/DFFB	5
BP	GO:0097193	intrinsic apoptotic signaling pathway	9/39	301/18614	9.29022e-09	2.20062e-06	1.32508e-06	BCL2/ATM/MYBBP1A/TP53/PPP1R13B/PIK3R1/TRAF2/DNM1L/CHEK2	9
BP	GO:1903624	regulation of DNA catabolic process	4/39	13/18614	1.16026e-08	2.44299e-06	1.47102e-06	ATM/DFFA/ENDOG/DFFB	4
BP	GO:0070227	lymphocyte apoptotic process	6/39	80/18614	1.51754e-08	2.87574e-06	1.73159e-06	PRKCQ/BCL2/FASLG/TP53/DFFA/CHEK2	6
BP	GO:0097194	execution phase of apoptosis	6/39	87/18614	2.52313e-08	4.34667e-06	2.6173e-06	FASLG/EXOG/TP53/DFFA/ENDOG/DFFB	6
BP	GO:0006309	apoptotic DNA fragmentation	4/39	19/18614	6.23318e-08	9.25583e-06	5.57329e-06	EXOG/DFFA/ENDOG/DFFB	4
BP	GO:0072331	signal transduction by p53 class mediator	7/39	173/18614	6.34964e-08	9.25583e-06	5.57329e-06	BCL2/ATM/MYBBP1A/TP53/PPP1R13B/MTOR/CHEK2	7
BP	GO:0097300	programmed necrotic cell death	5/39	53/18614	8.25133e-08	1.11688e-05	6.72515e-06	FASLG/TP53/BIRC3/TRAF2/DNM1L	5
BP	GO:0071887	leukocyte apoptotic process	6/39	117/18614	1.49289e-07	1.88602e-05	1.13564e-05	PRKCQ/BCL2/FASLG/TP53/DFFA/CHEK2	6
BP	GO:0030262	apoptotic nuclear changes	4/39	28/18614	3.24838e-07	3.8473e-05	2.31661e-05	EXOG/DFFA/ENDOG/DFFB	4
BP	GO:0070265	necrotic cell death	5/39	71/18614	3.64238e-07	4.06018e-05	2.44479e-05	FASLG/TP53/BIRC3/TRAF2/DNM1L	5
BP	GO:0071214	cellular response to abiotic stimulus	8/39	339/18614	4.19134e-07	4.10719e-05	2.4731e-05	ATM/MAP3K14/TP53/MAPK8/PIK3R1/TNFRSF10A/MTOR/CHEK2	8
BP	GO:0104004	cellular response to environmental stimulus	8/39	339/18614	4.19134e-07	4.10719e-05	2.4731e-05	ATM/MAP3K14/TP53/MAPK8/PIK3R1/TNFRSF10A/MTOR/CHEK2	8
BP	GO:0006921	cellular component disassembly involved in execution phase of apoptosis	4/39	30/18614	4.33476e-07	4.10719e-05	2.4731e-05	EXOG/DFFA/ENDOG/DFFB	4
BP	GO:0072332	intrinsic apoptotic signaling pathway by p53 class mediator	5/39	83/18614	7.97532e-07	7.19678e-05	4.33346e-05	BCL2/MYBBP1A/TP53/PPP1R13B/CHEK2	5
BP	GO:1902510	regulation of apoptotic DNA fragmentation	3/39	11/18614	1.38689e-06	0.000119462	7.19324e-05	DFFA/ENDOG/DFFB	3
BP	GO:0008630	intrinsic apoptotic signaling pathway in response to DNA damage	5/39	103/18614	2.33244e-06	0.000192173	0.000115715	BCL2/ATM/TP53/PIK3R1/CHEK2	5
BP	GO:0070266	necroptotic process	4/39	46/18614	2.51976e-06	0.000198956	0.000119799	FASLG/TP53/BIRC3/DNM1L	4
BP	GO:1901796	regulation of signal transduction by p53 class mediator	5/39	106/18614	2.6878e-06	0.000203736	0.000122677	BCL2/ATM/TP53/MTOR/CHEK2	5
BP	GO:0002764	immune response-regulating signaling pathway	8/39	450/18614	3.49282e-06	0.000254573	0.000153288	PRKCQ/BCL2/BIRC3/MAPK8/APPL1/IKBKB/IRAK3/BMX	8
BP	GO:0071496	cellular response to external stimulus	7/39	327/18614	4.59512e-06	0.00032251	0.000194195	BCL2/MYBBP1A/MAP3K14/TP53/MAPK8/TNFRSF10A/MTOR	7
BP	GO:0038093	Fc receptor signaling pathway	4/39	54/18614	4.82486e-06	0.000326539	0.000196622	PRKCQ/MAPK8/APPL1/IKBKB	4
BP	GO:0009895	negative regulation of catabolic process	7/39	337/18614	5.59916e-06	0.00035791	0.000215511	BCL2/TP53/DFFA/DFFB/TRAF2/MTOR/IRAK3	7
BP	GO:0090399	replicative senescence	3/39	17/18614	5.66612e-06	0.00035791	0.000215511	ATM/TP53/CHEK2	3
BP	GO:0010332	response to gamma radiation	4/39	57/18614	5.9993e-06	0.000366732	0.000220823	BCL2/ATM/TP53/CHEK2	4
BP	GO:0006977	DNA damage response, signal transduction by p53 class mediator resulting in cell cycle arrest	3/39	18/18614	6.78949e-06	0.000396718	0.000238879	ATM/TP53/CHEK2	3
BP	GO:0010506	regulation of autophagy	7/39	348/18614	6.90854e-06	0.000396718	0.000238879	BCL2/ATM/TP53/MAPK8/ENDOG/DNM1L/MTOR	7
BP	GO:0046777	protein autophosphorylation	6/39	227/18614	7.17568e-06	0.000399939	0.000240819	ATM/PRKX/MTOR/CHEK2/IRAK3/BMX	6
BP	GO:0070242	thymocyte apoptotic process	3/39	19/18614	8.05083e-06	0.000435895	0.000262469	TP53/DFFA/CHEK2	3
BP	GO:0031330	negative regulation of cellular catabolic process	6/39	251/18614	1.27242e-05	0.000669788	0.000403305	BCL2/TP53/DFFA/DFFB/TRAF2/MTOR	6
BP	GO:0038095	Fc-epsilon receptor signaling pathway	3/39	23/18614	1.4629e-05	0.000749244	0.000451149	PRKCQ/MAPK8/IKBKB	3
BP	GO:0010822	positive regulation of mitochondrion organization	4/39	75/18614	1.79669e-05	0.000895981	0.000539505	TP53/MAPK8/ENDOG/DNM1L	4
BP	GO:0043254	regulation of protein-containing complex assembly	7/39	409/18614	1.96845e-05	0.000944855	0.000568934	ATM/TP53/SPTAN1/MAPK8/TRAF2/MTOR/GSN	7
BP	GO:0090559	regulation of membrane permeability	4/39	77/18614	1.99442e-05	0.000944855	0.000568934	BCL2/TP53/MAPK8/MTOR	4
BP	GO:0009267	cellular response to starvation	5/39	170/18614	2.68252e-05	0.00123985	0.000746561	BCL2/MYBBP1A/TP53/MAPK8/MTOR	5
BP	GO:0031571	mitotic G1 DNA damage checkpoint signaling	3/39	29/18614	2.99218e-05	0.00128389	0.00077308	ATM/TP53/CHEK2	3
BP	GO:0044819	mitotic G1/S transition checkpoint signaling	3/39	29/18614	2.99218e-05	0.00128389	0.00077308	ATM/TP53/CHEK2	3
BP	GO:0008625	extrinsic apoptotic signaling pathway via death domain receptors	4/39	86/18614	3.08757e-05	0.00128389	0.00077308	BCL2/FASLG/PIK3R1/TNFRSF10A	4
BP	GO:2000134	negative regulation of G1/S transition of mitotic cell cycle	4/39	86/18614	3.08757e-05	0.00128389	0.00077308	BCL2/ATM/TP53/CHEK2	4
BP	GO:0000002	mitochondrial genome maintenance	3/39	30/18614	3.31982e-05	0.00128389	0.00077308	AKT3/TP53/ENDOG	3
BP	GO:0002360	T cell lineage commitment	3/39	30/18614	3.31982e-05	0.00128389	0.00077308	BCL2/TP53/MTOR	3
BP	GO:0070498	interleukin-1-mediated signaling pathway	3/39	30/18614	3.31982e-05	0.00128389	0.00077308	IKBKB/IRAK3/IL1R1	3
BP	GO:0071480	cellular response to gamma radiation	3/39	30/18614	3.31982e-05	0.00128389	0.00077308	ATM/TP53/CHEK2	3
BP	GO:2000045	regulation of G1/S transition of mitotic cell cycle	5/39	186/18614	4.12581e-05	0.00156368	0.000941554	BCL2/ATM/TP53/APPL1/CHEK2	5
BP	GO:0044772	mitotic cell cycle phase transition	7/39	467/18614	4.58969e-05	0.00170538	0.00102688	BCL2/ATM/CHMP7/TP53/APPL1/AVEN/CHEK2	7
BP	GO:0043123	positive regulation of I-kappaB kinase/NF-kappaB signaling	5/39	192/18614	4.79978e-05	0.00174915	0.00105323	FASLG/MAP3K14/BIRC3/TRAF2/IKBKB	5
BP	GO:1902807	negative regulation of cell cycle G1/S phase transition	4/39	97/18614	4.95514e-05	0.00176951	0.00106549	BCL2/ATM/TP53/CHEK2	4
BP	GO:1901991	negative regulation of mitotic cell cycle phase transition	5/39	194/18614	5.0424e-05	0.00176951	0.00106549	BCL2/ATM/TP53/AVEN/CHEK2	5
BP	GO:0002768	immune response-regulating cell surface receptor signaling pathway	6/39	329/18614	5.81124e-05	0.00200224	0.00120562	PRKCQ/BCL2/MAPK8/APPL1/IKBKB/BMX	6
BP	GO:0019221	cytokine-mediated signaling pathway	7/39	492/18614	6.37974e-05	0.00215886	0.00129993	TP53/BIRC3/APPL1/TRAF2/IKBKB/IRAK3/IL1R1	7
BP	GO:0042594	response to starvation	5/39	207/18614	6.85968e-05	0.00228054	0.0013732	BCL2/MYBBP1A/TP53/MAPK8/MTOR	5
BP	GO:0070232	regulation of T cell apoptotic process	3/39	39/18614	7.37603e-05	0.00240993	0.00145111	PRKCQ/BCL2/TP53	3
BP	GO:0090398	cellular senescence	4/39	108/18614	7.53849e-05	0.00242126	0.00145793	ATM/AKT3/TP53/MAPK8	4
BP	GO:0033209	tumor necrosis factor-mediated signaling pathway	4/39	109/18614	7.81392e-05	0.00246116	0.00148196	TP53/BIRC3/TRAF2/IKBKB	4
BP	GO:1902806	regulation of cell cycle G1/S phase transition	5/39	214/18614	8.02758e-05	0.00246116	0.00148196	BCL2/ATM/TP53/APPL1/CHEK2	5
BP	GO:0062197	cellular response to chemical stress	6/39	349/18614	8.05235e-05	0.00246116	0.00148196	BCL2/ATM/TP53/MAPK8/ENDOG/MTOR	6
BP	GO:0009612	response to mechanical stimulus	5/39	215/18614	8.2062e-05	0.00246837	0.0014863	MAP3K14/MAPK8/ENDOG/TNFRSF10A/GSN	5
BP	GO:0008637	apoptotic mitochondrial changes	4/39	111/18614	8.38668e-05	0.00248324	0.00149526	BCL2/TP53/MAPK8/DNM1L	4
BP	GO:1901990	regulation of mitotic cell cycle phase transition	6/39	357/18614	9.12206e-05	0.00265943	0.00160135	BCL2/ATM/TP53/APPL1/AVEN/CHEK2	6
BP	GO:0097191	extrinsic apoptotic signaling pathway	5/39	227/18614	0.000105979	0.00300145	0.00180729	BCL2/FASLG/PIK3R1/TNFRSF10A/TRAF2	5
BP	GO:0042771	intrinsic apoptotic signaling pathway in response to DNA damage by p53 class mediator	3/39	44/18614	0.00010612	0.00300145	0.00180729	BCL2/TP53/CHEK2	3
BP	GO:0031669	cellular response to nutrient levels	5/39	230/18614	0.000112719	0.00314122	0.00189145	BCL2/MYBBP1A/TP53/MAPK8/MTOR	5
BP	GO:0070997	neuron death	6/39	373/18614	0.000116013	0.00318616	0.00191851	BCL2/FASLG/ATM/TP53/ENDOG/TRAF2	6
BP	GO:0045930	negative regulation of mitotic cell cycle	5/39	243/18614	0.000145818	0.00391172	0.0023554	BCL2/ATM/TP53/AVEN/CHEK2	5
BP	GO:0042149	cellular response to glucose starvation	3/39	49/18614	0.00014656	0.00391172	0.0023554	BCL2/MYBBP1A/TP53	3
BP	GO:0000082	G1/S transition of mitotic cell cycle	5/39	251/18614	0.000169602	0.00446382	0.00268784	BCL2/ATM/TP53/APPL1/CHEK2	5
BP	GO:0045786	negative regulation of cell cycle	6/39	404/18614	0.000179191	0.00465159	0.0028009	BCL2/ATM/TP53/PPP1R13B/AVEN/CHEK2	6
BP	GO:0031929	TOR signaling	4/39	137/18614	0.00018913	0.00478314	0.00288011	ATM/AKT3/ENDOG/MTOR	4
BP	GO:0034612	response to tumor necrosis factor	5/39	257/18614	0.000189306	0.00478314	0.00288011	TP53/BIRC3/ENDOG/TRAF2/IKBKB	5
BP	GO:0043122	regulation of I-kappaB kinase/NF-kappaB signaling	5/39	258/18614	0.000192754	0.00480616	0.00289398	FASLG/MAP3K14/BIRC3/TRAF2/IKBKB	5
BP	GO:0031668	cellular response to extracellular stimulus	5/39	261/18614	0.000203384	0.00500537	0.00301392	BCL2/MYBBP1A/TP53/MAPK8/MTOR	5
BP	GO:0043525	positive regulation of neuron apoptotic process	3/39	55/18614	0.000206891	0.00502638	0.00302658	FASLG/ATM/TP53	3
BP	GO:0038061	NIK/NF-kappaB signaling	4/39	142/18614	0.000216996	0.00520516	0.00313423	MAP3K14/BIRC3/TNFRSF10A/TRAF2	4
BP	GO:0010212	response to ionizing radiation	4/39	143/18614	0.000222906	0.00528008	0.00317934	BCL2/ATM/TP53/CHEK2	4
BP	GO:0002757	immune response-activating signaling pathway	6/39	423/18614	0.000229712	0.00537412	0.00323597	BCL2/BIRC3/APPL1/IKBKB/IRAK3/BMX	6
BP	GO:0035264	multicellular organism growth	4/39	145/18614	0.000235072	0.00543245	0.00327109	BCL2/ATM/TP53/MTOR	4
BP	GO:0001836	release of cytochrome c from mitochondria	3/39	58/18614	0.000242278	0.00553152	0.00333074	BCL2/TP53/DNM1L	3
BP	GO:0051053	negative regulation of DNA metabolic process	4/39	148/18614	0.000254208	0.00561642	0.00338186	ATM/TP53/DFFA/DFFB	4
BP	GO:1901988	negative regulation of cell cycle phase transition	5/39	274/18614	0.000254721	0.00561642	0.00338186	BCL2/ATM/TP53/AVEN/CHEK2	5
BP	GO:0070228	regulation of lymphocyte apoptotic process	3/39	59/18614	0.000254888	0.00561642	0.00338186	PRKCQ/BCL2/TP53	3
BP	GO:0071456	cellular response to hypoxia	4/39	149/18614	0.000260829	0.00568127	0.00342091	BCL2/TP53/ENDOG/MTOR	4
BP	GO:0010821	regulation of mitochondrion organization	4/39	151/18614	0.000274442	0.00584345	0.00351856	TP53/MAPK8/ENDOG/DNM1L	4
BP	GO:0044839	cell cycle G2/M phase transition	4/39	151/18614	0.000274442	0.00584345	0.00351856	ATM/TP53/AVEN/CHEK2	4
BP	GO:0150065	regulation of deacetylase activity	2/39	12/18614	0.000278599	0.00586606	0.00353218	MAPK8/FNTA	2
BP	GO:0044843	cell cycle G1/S phase transition	5/39	281/18614	0.000286161	0.00594366	0.00357891	BCL2/ATM/TP53/APPL1/CHEK2	5
BP	GO:0030183	B cell differentiation	4/39	153/18614	0.000288558	0.00594366	0.00357891	BCL2/ATM/TP53/PIK3R1	4
BP	GO:0046902	regulation of mitochondrial membrane permeability	3/39	62/18614	0.000295244	0.00596337	0.00359078	BCL2/TP53/MAPK8	3
BP	GO:0009411	response to UV	4/39	154/18614	0.000295808	0.00596337	0.00359078	BCL2/TP53/MAPK8/PIK3R1	4
BP	GO:0034655	nucleobase-containing compound catabolic process	6/39	447/18614	0.000308944	0.00611055	0.0036794	EXOG/ATM/DFFA/ENDOG/DFFB/TRAF2	6
BP	GO:0070059	intrinsic apoptotic signaling pathway in response to endoplasmic reticulum stress	3/39	63/18614	0.000309558	0.00611055	0.0036794	BCL2/TP53/TRAF2	3
BP	GO:0036294	cellular response to decreased oxygen levels	4/39	157/18614	0.000318346	0.00621922	0.00374483	BCL2/TP53/ENDOG/MTOR	4
BP	GO:0009314	response to radiation	6/39	452/18614	0.000327874	0.00629404	0.00378988	BCL2/ATM/TP53/MAPK8/PIK3R1/CHEK2	6
BP	GO:0043471	regulation of cellular carbohydrate catabolic process	2/39	13/18614	0.000328818	0.00629404	0.00378988	TP53/MTOR	2
BP	GO:0051092	positive regulation of NF-kappaB transcription factor activity	4/39	159/18614	0.000334039	0.00633003	0.00381156	PRKCQ/TRAF2/IKBKB/IRAK3	4
BP	GO:0001666	response to hypoxia	5/39	293/18614	0.00034683	0.00639709	0.00385194	BCL2/ATM/TP53/ENDOG/MTOR	5
BP	GO:0007249	I-kappaB kinase/NF-kappaB signaling	5/39	293/18614	0.00034683	0.00639709	0.00385194	FASLG/MAP3K14/BIRC3/TRAF2/IKBKB	5
BP	GO:1901987	regulation of cell cycle phase transition	6/39	457/18614	0.000347705	0.00639709	0.00385194	BCL2/ATM/TP53/APPL1/AVEN/CHEK2	6
BP	GO:0001959	regulation of cytokine-mediated signaling pathway	4/39	165/18614	0.000384448	0.00700509	0.00421804	TRAF2/IKBKB/IRAK3/IL1R1	4
BP	GO:0048511	rhythmic process	5/39	303/18614	0.000404454	0.00729943	0.00439527	MYBBP1A/TP53/MAPK8/DNM1L/MTOR	5
BP	GO:0036293	response to decreased oxygen levels	5/39	306/18614	0.000423078	0.00756351	0.00455428	BCL2/ATM/TP53/ENDOG/MTOR	5
BP	GO:0071453	cellular response to oxygen levels	4/39	172/18614	0.000449889	0.00796767	0.00479764	BCL2/TP53/ENDOG/MTOR	4
BP	GO:2001020	regulation of response to DNA damage stimulus	5/39	311/18614	0.000455551	0.00797806	0.0048039	BCL2/ATM/TP53/ENDOG/CHEK2	5
BP	GO:0030330	DNA damage response, signal transduction by p53 class mediator	3/39	72/18614	0.000458896	0.00797806	0.0048039	ATM/TP53/CHEK2	3
BP	GO:0071260	cellular response to mechanical stimulus	3/39	73/18614	0.000477872	0.00815666	0.00491144	MAP3K14/MAPK8/TNFRSF10A	3
BP	GO:1905475	regulation of protein localization to membrane	4/39	175/18614	0.000480234	0.00815666	0.00491144	MAPK8/PIK3R1/APPL1/GSN	4
BP	GO:0044270	cellular nitrogen compound catabolic process	6/39	486/18614	0.000482082	0.00815666	0.00491144	EXOG/ATM/DFFA/ENDOG/DFFB/TRAF2	6
BP	GO:0046700	heterocycle catabolic process	6/39	488/18614	0.000492661	0.00816094	0.00491401	EXOG/ATM/DFFA/ENDOG/DFFB/TRAF2	6
BP	GO:0010948	negative regulation of cell cycle process	5/39	317/18614	0.000496968	0.00816094	0.00491401	BCL2/ATM/TP53/AVEN/CHEK2	5
BP	GO:0001819	positive regulation of cytokine production	6/39	489/18614	0.000498019	0.00816094	0.00491401	PRKCQ/PIK3R1/APPL1/TRAF2/IRAK3/IL1R1	6
BP	GO:0060759	regulation of response to cytokine stimulus	4/39	177/18614	0.000501257	0.00816094	0.00491401	TRAF2/IKBKB/IRAK3/IL1R1	4
BP	GO:0034349	glial cell apoptotic process	2/39	16/18614	0.000503868	0.00816094	0.00491401	TP53/TRAF2	2
BP	GO:0071479	cellular response to ionizing radiation	3/39	75/18614	0.000517318	0.00830777	0.00500243	ATM/TP53/CHEK2	3
BP	GO:0002253	activation of immune response	6/39	495/18614	0.000531128	0.00835685	0.00503198	BCL2/BIRC3/APPL1/IKBKB/IRAK3/BMX	6
BP	GO:0016236	macroautophagy	5/39	322/18614	0.000533603	0.00835685	0.00503198	ATM/CHMP7/TP53/MAPK8/MTOR	5
BP	GO:0031647	regulation of protein stability	5/39	322/18614	0.000533603	0.00835685	0.00503198	BCL2/TP53/PIK3R1/CHEK2/GSN	5
BP	GO:1900034	regulation of cellular response to heat	2/39	17/18614	0.000570295	0.00881622	0.00530859	ATM/MTOR	2
BP	GO:1901214	regulation of neuron death	5/39	327/18614	0.00057224	0.00881622	0.00530859	BCL2/FASLG/ATM/TP53/TRAF2	5
BP	GO:0070482	response to oxygen levels	5/39	333/18614	0.000621345	0.00933991	0.00562392	BCL2/ATM/TP53/ENDOG/MTOR	5
BP	GO:0043242	negative regulation of protein-containing complex disassembly	3/39	80/18614	0.000624904	0.00933991	0.00562392	SPTAN1/GSN/IRAK3	3
BP	GO:0006978	DNA damage response, signal transduction by p53 class mediator resulting in transcription of p21 class mediator	2/39	18/18614	0.000640733	0.00933991	0.00562392	TP53/CHEK2	2
BP	GO:0007250	activation of NF-kappaB-inducing kinase activity	2/39	18/18614	0.000640733	0.00933991	0.00562392	TNFRSF10A/TRAF2	2
BP	GO:0045945	positive regulation of transcription by RNA polymerase III	2/39	18/18614	0.000640733	0.00933991	0.00562392	MYBBP1A/MTOR	2
BP	GO:1903729	regulation of plasma membrane organization	2/39	18/18614	0.000640733	0.00933991	0.00562392	FASLG/GSN	2
BP	GO:2000811	negative regulation of anoikis	2/39	18/18614	0.000640733	0.00933991	0.00562392	BCL2/ZNF304	2
BP	GO:0044773	mitotic DNA damage checkpoint signaling	3/39	81/18614	0.000648002	0.00937376	0.00564431	ATM/TP53/CHEK2	3
BP	GO:0071478	cellular response to radiation	4/39	191/18614	0.000667227	0.00957875	0.00576773	ATM/TP53/PIK3R1/CHEK2	4
BP	GO:0006098	pentose-phosphate shunt	2/39	19/18614	0.000715166	0.0101137	0.00608987	TP53/MTOR	2
BP	GO:0042772	DNA damage response, signal transduction resulting in transcription	2/39	19/18614	0.000715166	0.0101137	0.00608987	TP53/CHEK2	2
BP	GO:0031334	positive regulation of protein-containing complex assembly	4/39	195/18614	0.000721035	0.0101212	0.00609436	ATM/TP53/MAPK8/MTOR	4
BP	GO:0044774	mitotic DNA integrity checkpoint signaling	3/39	85/18614	0.000745829	0.0103611	0.00623882	ATM/TP53/CHEK2	3
BP	GO:0002520	immune system development	4/39	197/18614	0.000749062	0.0103611	0.00623882	BCL2/ATM/TP53/IRAK3	4
BP	GO:0008340	determination of adult lifespan	2/39	20/18614	0.000793578	0.0108025	0.00650462	ATM/TP53	2
BP	GO:0070314	G1 to G0 transition	2/39	20/18614	0.000793578	0.0108025	0.00650462	MYBBP1A/TP53	2
BP	GO:0010507	negative regulation of autophagy	3/39	87/18614	0.000798077	0.0108025	0.00650462	BCL2/TP53/MTOR	3
BP	GO:0007252	I-kappaB phosphorylation	2/39	21/18614	0.000875953	0.0117533	0.00707714	TRAF2/IKBKB	2
BP	GO:2000106	regulation of leukocyte apoptotic process	3/39	90/18614	0.000880726	0.0117533	0.00707714	PRKCQ/BCL2/TP53	3
BP	GO:0007623	circadian rhythm	4/39	207/18614	0.000900884	0.0119062	0.00716916	MYBBP1A/TP53/MAPK8/MTOR	4
BP	GO:0010639	negative regulation of organelle organization	5/39	362/18614	0.000904742	0.0119062	0.00716916	ATM/TP53/SPTAN1/PIK3R1/GSN	5
BP	GO:0002758	innate immune response-activating signaling pathway	4/39	209/18614	0.000933667	0.0121014	0.0072867	BIRC3/APPL1/IKBKB/IRAK3	4
BP	GO:0009791	post-embryonic development	3/39	92/18614	0.000938733	0.0121014	0.0072867	BCL2/ATM/MTOR	3
BP	GO:1901216	positive regulation of neuron death	3/39	92/18614	0.000938733	0.0121014	0.0072867	FASLG/ATM/TP53	3
BP	GO:0006740	NADPH regeneration	2/39	22/18614	0.000962274	0.012237	0.00736834	TP53/MTOR	2
BP	GO:0032042	mitochondrial DNA metabolic process	2/39	22/18614	0.000962274	0.012237	0.00736834	TP53/ENDOG	2
BP	GO:1900542	regulation of purine nucleotide metabolic process	3/39	93/18614	0.000968624	0.012237	0.00736834	TP53/DNM1L/MTOR	3
BP	GO:0006140	regulation of nucleotide metabolic process	3/39	94/18614	0.000999113	0.0125385	0.00754994	TP53/DNM1L/MTOR	3
BP	GO:0002363	alpha-beta T cell lineage commitment	2/39	23/18614	0.00105253	0.013122	0.00790123	BCL2/MTOR	2
BP	GO:0048534	hematopoietic or lymphoid organ development	3/39	96/18614	0.0010619	0.0131523	0.00791951	BCL2/ATM/TP53	3
BP	GO:0043523	regulation of neuron apoptotic process	4/39	219/18614	0.00111032	0.0136627	0.00822686	BCL2/FASLG/ATM/TP53	4
BP	GO:0043369	CD4-positive or CD8-positive, alpha-beta T cell lineage commitment	2/39	24/18614	0.00114669	0.0139294	0.00838741	BCL2/MTOR	2
BP	GO:0070233	negative regulation of T cell apoptotic process	2/39	24/18614	0.00114669	0.0139294	0.00838741	PRKCQ/BCL2	2
BP	GO:0006582	melanin metabolic process	2/39	25/18614	0.00124476	0.0149292	0.00898945	BCL2/APPL1	2
BP	GO:0010623	programmed cell death involved in cell development	2/39	25/18614	0.00124476	0.0149292	0.00898945	BCL2/FASLG	2
BP	GO:0002726	positive regulation of T cell cytokine production	2/39	26/18614	0.00134671	0.01595	0.00960414	TRAF2/IL1R1	2
BP	GO:1904353	regulation of telomere capping	2/39	26/18614	0.00134671	0.01595	0.00960414	PRKCQ/ATM	2
BP	GO:0002218	activation of innate immune response	4/39	233/18614	0.00139543	0.0164244	0.0098898	BIRC3/APPL1/IKBKB/IRAK3	4
BP	GO:0071356	cellular response to tumor necrosis factor	4/39	235/18614	0.00143996	0.0167837	0.0101061	TP53/BIRC3/TRAF2/IKBKB	4
BP	GO:0062207	regulation of pattern recognition receptor signaling pathway	3/39	107/18614	0.00145192	0.0167837	0.0101061	BIRC3/APPL1/IRAK3	3
BP	GO:0090200	positive regulation of release of cytochrome c from mitochondria	2/39	27/18614	0.00145252	0.0167837	0.0101061	TP53/DNM1L	2
BP	GO:0018107	peptidyl-threonine phosphorylation	3/39	109/18614	0.00153124	0.0173755	0.0104625	BCL2/MAPK8/MTOR	3
BP	GO:0032147	activation of protein kinase activity	3/39	109/18614	0.00153124	0.0173755	0.0104625	TNFRSF10A/TRAF2/MTOR	3
BP	GO:1904035	regulation of epithelial cell apoptotic process	3/39	109/18614	0.00153124	0.0173755	0.0104625	BCL2/FASLG/GSN	3
BP	GO:0032984	protein-containing complex disassembly	4/39	240/18614	0.00155562	0.0175168	0.0105476	CHMP7/SPTAN1/GSN/IRAK3	4
BP	GO:0051156	glucose 6-phosphate metabolic process	2/39	28/18614	0.00156219	0.0175168	0.0105476	TP53/MTOR	2
BP	GO:0071347	cellular response to interleukin-1	3/39	111/18614	0.00161324	0.0178777	0.0107649	IKBKB/IRAK3/IL1R1	3
BP	GO:2001252	positive regulation of chromosome organization	3/39	111/18614	0.00161324	0.0178777	0.0107649	PRKCQ/ATM/ZNF304	3
BP	GO:1902749	regulation of cell cycle G2/M phase transition	3/39	112/18614	0.00165525	0.0182366	0.010981	ATM/TP53/AVEN	3
BP	GO:0010592	positive regulation of lamellipodium assembly	2/39	29/18614	0.00167569	0.0182496	0.0109888	PIK3R1/MTOR	2
BP	GO:1900117	regulation of execution phase of apoptosis	2/39	29/18614	0.00167569	0.0182496	0.0109888	TP53/DFFA	2
BP	GO:0006470	protein dephosphorylation	4/39	249/18614	0.00177991	0.0190885	0.0114939	BCL2/PPP3CC/MTOR/IKBKB	4
BP	GO:0030098	lymphocyte differentiation	5/39	422/18614	0.00178477	0.0190885	0.0114939	BCL2/ATM/TP53/PIK3R1/MTOR	5
BP	GO:0006359	regulation of transcription by RNA polymerase III	2/39	30/18614	0.00179301	0.0190885	0.0114939	MYBBP1A/MTOR	2
BP	GO:0090312	positive regulation of protein deacetylation	2/39	30/18614	0.00179301	0.0190885	0.0114939	TP53/FNTA	2
BP	GO:0032006	regulation of TOR signaling	3/39	116/18614	0.00183014	0.0191609	0.0115375	ATM/AKT3/ENDOG	3
BP	GO:0042752	regulation of circadian rhythm	3/39	116/18614	0.00183014	0.0191609	0.0115375	TP53/MAPK8/MTOR	3
BP	GO:0071346	cellular response to type II interferon	3/39	116/18614	0.00183014	0.0191609	0.0115375	FASLG/TP53/GSN	3
BP	GO:0048873	homeostasis of number of cells within a tissue	2/39	31/18614	0.00191413	0.0199301	0.0120007	BCL2/AKT3	2
BP	GO:0002718	regulation of cytokine production involved in immune response	3/39	119/18614	0.00196861	0.0202745	0.0122081	TRAF2/IRAK3/IL1R1	3
BP	GO:0018210	peptidyl-threonine modification	3/39	119/18614	0.00196861	0.0202745	0.0122081	BCL2/MAPK8/MTOR	3
BP	GO:0007006	mitochondrial membrane organization	3/39	120/18614	0.00201618	0.0205902	0.0123982	BCL2/TP53/MAPK8	3
BP	GO:0010165	response to X-ray	2/39	32/18614	0.00203904	0.0205902	0.0123982	ATM/TP53	2
BP	GO:0034976	response to endoplasmic reticulum stress	4/39	259/18614	0.00205449	0.0205902	0.0123982	BCL2/TP53/PIK3R1/TRAF2	4
BP	GO:0051402	neuron apoptotic process	4/39	259/18614	0.00205449	0.0205902	0.0123982	BCL2/FASLG/ATM/TP53	4
BP	GO:0002367	cytokine production involved in immune response	3/39	121/18614	0.00206446	0.0205902	0.0123982	TRAF2/IRAK3/IL1R1	3
BP	GO:2000278	regulation of DNA biosynthetic process	3/39	121/18614	0.00206446	0.0205902	0.0123982	PRKCQ/ATM/TP53	3
BP	GO:0000077	DNA damage checkpoint signaling	3/39	123/18614	0.00216317	0.0212394	0.012789	ATM/TP53/CHEK2	3
BP	GO:0002824	positive regulation of adaptive immune response based on somatic recombination of immune receptors built from immunoglobulin superfamily domains	3/39	123/18614	0.00216317	0.0212394	0.012789	PRKCQ/TRAF2/IL1R1	3
BP	GO:0043244	regulation of protein-containing complex disassembly	3/39	123/18614	0.00216317	0.0212394	0.012789	SPTAN1/GSN/IRAK3	3
BP	GO:0007015	actin filament organization	5/39	442/18614	0.00218463	0.0213395	0.0128494	BCL2/SPTAN1/PIK3R1/MTOR/GSN	5
BP	GO:0016242	negative regulation of macroautophagy	2/39	34/18614	0.00230017	0.0219037	0.013189	TP53/MTOR	2
BP	GO:0032212	positive regulation of telomere maintenance via telomerase	2/39	34/18614	0.00230017	0.0219037	0.013189	PRKCQ/ATM	2
BP	GO:0032743	positive regulation of interleukin-2 production	2/39	34/18614	0.00230017	0.0219037	0.013189	PRKCQ/TRAF2	2
BP	GO:0034121	regulation of toll-like receptor signaling pathway	2/39	34/18614	0.00230017	0.0219037	0.013189	BIRC3/IRAK3	2
BP	GO:1902624	positive regulation of neutrophil migration	2/39	34/18614	0.00230017	0.0219037	0.013189	DNM1L/IL1R1	2
BP	GO:0110053	regulation of actin filament organization	4/39	268/18614	0.00232559	0.022035	0.0132681	SPTAN1/PIK3R1/MTOR/GSN	4
BP	GO:0003014	renal system process	3/39	127/18614	0.00236929	0.0223374	0.0134502	PRKACB/BCL2/GSN	3
BP	GO:0051091	positive regulation of DNA-binding transcription factor activity	4/39	271/18614	0.0024212	0.0224121	0.0134952	PRKCQ/TRAF2/IKBKB/IRAK3	4
BP	GO:0008286	insulin receptor signaling pathway	3/39	128/18614	0.00242266	0.0224121	0.0134952	PRKCQ/PIK3R1/APPL1	3
BP	GO:0045943	positive regulation of transcription by RNA polymerase I	2/39	35/18614	0.00243636	0.0224121	0.0134952	MYBBP1A/MTOR	2
BP	GO:0062098	regulation of programmed necrotic cell death	2/39	35/18614	0.00243636	0.0224121	0.0134952	TP53/BIRC3	2
BP	GO:1902253	regulation of intrinsic apoptotic signaling pathway by p53 class mediator	2/39	35/18614	0.00243636	0.0224121	0.0134952	BCL2/TP53	2
BP	GO:0032868	response to insulin	4/39	272/18614	0.00245366	0.0224622	0.0135254	PRKCQ/PIK3R1/APPL1/MTOR	4
BP	GO:0002821	positive regulation of adaptive immune response	3/39	129/18614	0.00247677	0.0225648	0.0135872	PRKCQ/TRAF2/IL1R1	3
BP	GO:0030833	regulation of actin filament polymerization	3/39	130/18614	0.00253163	0.0229542	0.0138216	SPTAN1/MTOR/GSN	3
BP	GO:0060218	hematopoietic stem cell differentiation	2/39	36/18614	0.00257627	0.0230179	0.0138599	BCL2/TP53	2
BP	GO:0042113	B cell activation	4/39	276/18614	0.00258652	0.0230179	0.0138599	BCL2/ATM/TP53/PIK3R1	4
BP	GO:0051258	protein polymerization	4/39	276/18614	0.00258652	0.0230179	0.0138599	SPTAN1/DNM1L/MTOR/GSN	4
BP	GO:0006661	phosphatidylinositol biosynthetic process	3/39	131/18614	0.00258723	0.0230179	0.0138599	ATM/PIK3R1/BMX	3
BP	GO:0031570	DNA integrity checkpoint signaling	3/39	132/18614	0.00264359	0.0233363	0.0140517	ATM/TP53/CHEK2	3
BP	GO:0009303	rRNA transcription	2/39	37/18614	0.00271989	0.0233363	0.0140517	TP53/MTOR	2
BP	GO:0043516	regulation of DNA damage response, signal transduction by p53 class mediator	2/39	37/18614	0.00271989	0.0233363	0.0140517	ATM/TP53	2
BP	GO:0046326	positive regulation of glucose import	2/39	37/18614	0.00271989	0.0233363	0.0140517	PIK3R1/APPL1	2
BP	GO:1902745	positive regulation of lamellipodium organization	2/39	37/18614	0.00271989	0.0233363	0.0140517	PIK3R1/MTOR	2
BP	GO:1903146	regulation of autophagy of mitochondrion	2/39	37/18614	0.00271989	0.0233363	0.0140517	TP53/DNM1L	2
BP	GO:1904358	positive regulation of telomere maintenance via telomere lengthening	2/39	37/18614	0.00271989	0.0233363	0.0140517	PRKCQ/ATM	2
BP	GO:0051090	regulation of DNA-binding transcription factor activity	5/39	465/18614	0.00272154	0.0233363	0.0140517	PRKCQ/MAPK8/TRAF2/IKBKB/IRAK3	5
BP	GO:0002369	T cell cytokine production	2/39	38/18614	0.00286721	0.0241201	0.0145237	TRAF2/IL1R1	2
BP	GO:0002724	regulation of T cell cytokine production	2/39	38/18614	0.00286721	0.0241201	0.0145237	TRAF2/IL1R1	2
BP	GO:0043368	positive T cell selection	2/39	38/18614	0.00286721	0.0241201	0.0145237	BCL2/MTOR	2
BP	GO:0070229	negative regulation of lymphocyte apoptotic process	2/39	38/18614	0.00286721	0.0241201	0.0145237	PRKCQ/BCL2	2
BP	GO:0000086	G2/M transition of mitotic cell cycle	3/39	136/18614	0.0028766	0.0241201	0.0145237	ATM/AVEN/CHEK2	3
BP	GO:1903131	mononuclear cell differentiation	5/39	474/18614	0.00295578	0.0246749	0.0148577	BCL2/ATM/TP53/PIK3R1/MTOR	5
BP	GO:0031667	response to nutrient levels	5/39	477/18614	0.00303702	0.0252419	0.0151991	BCL2/MYBBP1A/TP53/MAPK8/MTOR	5
BP	GO:0034341	response to type II interferon	3/39	139/18614	0.00305942	0.025317	0.0152444	FASLG/TP53/GSN	3
BP	GO:0034599	cellular response to oxidative stress	4/39	290/18614	0.00309053	0.0253907	0.0152887	BCL2/TP53/MAPK8/ENDOG	4
BP	GO:0007093	mitotic cell cycle checkpoint signaling	3/39	140/18614	0.00312191	0.0253907	0.0152887	ATM/TP53/CHEK2	3
BP	GO:1904019	epithelial cell apoptotic process	3/39	140/18614	0.00312191	0.0253907	0.0152887	BCL2/FASLG/GSN	3
BP	GO:2001235	positive regulation of apoptotic signaling pathway	3/39	140/18614	0.00312191	0.0253907	0.0152887	TP53/TRAF2/DNM1L	3
BP	GO:0016233	telomere capping	2/39	40/18614	0.00317287	0.0254681	0.0153353	PRKCQ/ATM	2
BP	GO:0051693	actin filament capping	2/39	40/18614	0.00317287	0.0254681	0.0153353	SPTAN1/GSN	2
BP	GO:0070884	regulation of calcineurin-NFAT signaling cascade	2/39	40/18614	0.00317287	0.0254681	0.0153353	PPP3CC/MTOR	2
BP	GO:0070555	response to interleukin-1	3/39	141/18614	0.00318519	0.0254681	0.0153353	IKBKB/IRAK3/IL1R1	3
BP	GO:0106056	regulation of calcineurin-mediated signaling	2/39	41/18614	0.00333118	0.0265234	0.0159708	PPP3CC/MTOR	2
BP	GO:0030217	T cell differentiation	4/39	300/18614	0.00348925	0.0273532	0.0164704	BCL2/TP53/PIK3R1/MTOR	4
BP	GO:0045089	positive regulation of innate immune response	4/39	300/18614	0.00348925	0.0273532	0.0164704	BIRC3/APPL1/IKBKB/IRAK3	4
BP	GO:0010591	regulation of lamellipodium assembly	2/39	42/18614	0.00349312	0.0273532	0.0164704	PIK3R1/MTOR	2
BP	GO:1904037	positive regulation of epithelial cell apoptotic process	2/39	42/18614	0.00349312	0.0273532	0.0164704	FASLG/GSN	2
BP	GO:0002429	immune response-activating cell surface receptor signaling pathway	4/39	302/18614	0.003573	0.027815	0.0167485	BCL2/APPL1/IKBKB/BMX	4
BP	GO:0002687	positive regulation of leukocyte migration	3/39	147/18614	0.00358145	0.027815	0.0167485	PIK3R1/DNM1L/IL1R1	3
BP	GO:0006739	NADP metabolic process	2/39	43/18614	0.00365869	0.0282988	0.0170398	TP53/MTOR	2
BP	GO:0008064	regulation of actin polymerization or depolymerization	3/39	149/18614	0.00371994	0.0286556	0.0172547	SPTAN1/MTOR/GSN	3
BP	GO:0046651	lymphocyte proliferation	4/39	306/18614	0.00374461	0.0287289	0.0172988	PRKCQ/BCL2/ATM/TP53	4
BP	GO:0010828	positive regulation of glucose transmembrane transport	2/39	44/18614	0.00382786	0.0287849	0.0173325	PIK3R1/APPL1	2
BP	GO:0030835	negative regulation of actin filament depolymerization	2/39	44/18614	0.00382786	0.0287849	0.0173325	SPTAN1/GSN	2
BP	GO:0044275	cellular carbohydrate catabolic process	2/39	44/18614	0.00382786	0.0287849	0.0173325	TP53/MTOR	2
BP	GO:0048512	circadian behavior	2/39	44/18614	0.00382786	0.0287849	0.0173325	TP53/MTOR	2
BP	GO:0090148	membrane fission	2/39	44/18614	0.00382786	0.0287849	0.0173325	CHMP7/DNM1L	2
BP	GO:0030832	regulation of actin filament length	3/39	152/18614	0.00393375	0.0294642	0.0177416	SPTAN1/MTOR/GSN	3
BP	GO:0002460	adaptive immune response based on somatic recombination of immune receptors built from immunoglobulin superfamily domains	4/39	311/18614	0.00396693	0.0295958	0.0178208	PRKCQ/TRAF2/MTOR/IL1R1	4
BP	GO:0033173	calcineurin-NFAT signaling cascade	2/39	45/18614	0.00400062	0.0296139	0.0178317	PPP3CC/MTOR	2
BP	GO:1902622	regulation of neutrophil migration	2/39	45/18614	0.00400062	0.0296139	0.0178317	DNM1L/IL1R1	2
BP	GO:0032943	mononuclear cell proliferation	4/39	313/18614	0.00405831	0.0299241	0.0180185	PRKCQ/BCL2/ATM/TP53	4
BP	GO:0046488	phosphatidylinositol metabolic process	3/39	154/18614	0.00408038	0.0299702	0.0180462	ATM/PIK3R1/BMX	3
BP	GO:0006356	regulation of transcription by RNA polymerase I	2/39	46/18614	0.00417695	0.0302112	0.0181913	MYBBP1A/MTOR	2
BP	GO:0007622	rhythmic behavior	2/39	46/18614	0.00417695	0.0302112	0.0181913	TP53/MTOR	2
BP	GO:0010830	regulation of myotube differentiation	2/39	46/18614	0.00417695	0.0302112	0.0181913	BCL2/MTOR	2
BP	GO:0042088	T-helper 1 type immune response	2/39	46/18614	0.00417695	0.0302112	0.0181913	MTOR/IL1R1	2
BP	GO:0046677	response to antibiotic	2/39	47/18614	0.00435684	0.0311555	0.01876	TP53/ENDOG	2
BP	GO:0051972	regulation of telomerase activity	2/39	47/18614	0.00435684	0.0311555	0.01876	PRKCQ/TP53	2
BP	GO:0090199	regulation of release of cytochrome c from mitochondria	2/39	47/18614	0.00435684	0.0311555	0.01876	TP53/DNM1L	2
BP	GO:0016241	regulation of macroautophagy	3/39	159/18614	0.00446143	0.0317835	0.0191381	TP53/MAPK8/MTOR	3
BP	GO:0009416	response to light stimulus	4/39	323/18614	0.00453676	0.0319845	0.0192591	BCL2/TP53/MAPK8/PIK3R1	4
BP	GO:0035794	positive regulation of mitochondrial membrane permeability	2/39	48/18614	0.00454028	0.0319845	0.0192591	TP53/MAPK8	2
BP	GO:0048538	thymus development	2/39	48/18614	0.00454028	0.0319845	0.0192591	BCL2/ATM	2
BP	GO:0030041	actin filament polymerization	3/39	162/18614	0.00470009	0.0327709	0.0197326	SPTAN1/MTOR/GSN	3
BP	GO:0034198	cellular response to amino acid starvation	2/39	49/18614	0.00472725	0.0327709	0.0197326	MAPK8/MTOR	2
BP	GO:0097720	calcineurin-mediated signaling	2/39	49/18614	0.00472725	0.0327709	0.0197326	PPP3CC/MTOR	2
BP	GO:1902108	regulation of mitochondrial membrane permeability involved in apoptotic process	2/39	49/18614	0.00472725	0.0327709	0.0197326	TP53/MAPK8	2
BP	GO:0002833	positive regulation of response to biotic stimulus	4/39	327/18614	0.00473838	0.0327709	0.0197326	BIRC3/APPL1/IKBKB/IRAK3	4
BP	GO:0006606	protein import into nucleus	3/39	163/18614	0.00478134	0.0329477	0.0198391	TP53/PIK3R1/APPL1	3
BP	GO:0051494	negative regulation of cytoskeleton organization	3/39	164/18614	0.00486343	0.033392	0.0201066	SPTAN1/PIK3R1/GSN	3
BP	GO:2000378	negative regulation of reactive oxygen species metabolic process	2/39	50/18614	0.00491773	0.033643	0.0202577	BCL2/TP53	2
BP	GO:0010939	regulation of necrotic cell death	2/39	51/18614	0.00511171	0.0344932	0.0207697	TP53/BIRC3	2
BP	GO:0043113	receptor clustering	2/39	51/18614	0.00511171	0.0344932	0.0207697	FNTA/GSN	2
BP	GO:0045058	T cell selection	2/39	51/18614	0.00511171	0.0344932	0.0207697	BCL2/MTOR	2
BP	GO:1902904	negative regulation of supramolecular fiber organization	3/39	167/18614	0.00511482	0.0344932	0.0207697	SPTAN1/PIK3R1/GSN	3
BP	GO:0051170	import into nucleus	3/39	168/18614	0.00520034	0.0349455	0.0210421	TP53/PIK3R1/APPL1	3
BP	GO:0048599	oocyte development	2/39	52/18614	0.00530918	0.0354257	0.0213312	BCL2/ATM	2
BP	GO:1990928	response to amino acid starvation	2/39	52/18614	0.00530918	0.0354257	0.0213312	MAPK8/MTOR	2
BP	GO:0007009	plasma membrane organization	3/39	170/18614	0.00537395	0.0357321	0.0215157	FASLG/CHMP7/GSN	3
BP	GO:0030834	regulation of actin filament depolymerization	2/39	53/18614	0.00551012	0.0361303	0.0217555	SPTAN1/GSN	2
BP	GO:0032210	regulation of telomere maintenance via telomerase	2/39	53/18614	0.00551012	0.0361303	0.0217555	PRKCQ/ATM	2
BP	GO:0051155	positive regulation of striated muscle cell differentiation	2/39	53/18614	0.00551012	0.0361303	0.0217555	BCL2/MTOR	2
BP	GO:1905710	positive regulation of membrane permeability	2/39	53/18614	0.00551012	0.0361303	0.0217555	TP53/MAPK8	2
BP	GO:0016311	dephosphorylation	4/39	342/18614	0.00554833	0.0362554	0.0218308	BCL2/PPP3CC/MTOR/IKBKB	4
BP	GO:2001242	regulation of intrinsic apoptotic signaling pathway	3/39	173/18614	0.00564087	0.0367085	0.0221036	BCL2/TP53/DNM1L	3
BP	GO:0006383	transcription by RNA polymerase III	2/39	54/18614	0.00571451	0.0367085	0.0221036	MYBBP1A/MTOR	2
BP	GO:0051452	intracellular pH reduction	2/39	54/18614	0.00571451	0.0367085	0.0221036	BCL2/FASLG	2
BP	GO:1902743	regulation of lamellipodium organization	2/39	54/18614	0.00571451	0.0367085	0.0221036	PIK3R1/MTOR	2
BP	GO:1903170	negative regulation of calcium ion transmembrane transport	2/39	54/18614	0.00571451	0.0367085	0.0221036	BCL2/PPP3CC	2
BP	GO:0032956	regulation of actin cytoskeleton organization	4/39	346/18614	0.00577904	0.0369976	0.0222777	SPTAN1/PIK3R1/MTOR/GSN	4
BP	GO:0046631	alpha-beta T cell activation	3/39	175/18614	0.00582318	0.0371547	0.0223723	PRKCQ/BCL2/MTOR	3
BP	GO:0070661	leukocyte proliferation	4/39	348/18614	0.00589678	0.037498	0.022579	PRKCQ/BCL2/ATM/TP53	4
BP	GO:2000772	regulation of cellular senescence	2/39	55/18614	0.00592234	0.0375346	0.022601	AKT3/TP53	2
BP	GO:0009994	oocyte differentiation	2/39	56/18614	0.00613361	0.0384874	0.0231747	BCL2/ATM	2
BP	GO:0010803	regulation of tumor necrosis factor-mediated signaling pathway	2/39	56/18614	0.00613361	0.0384874	0.0231747	TRAF2/IKBKB	2
BP	GO:2000107	negative regulation of leukocyte apoptotic process	2/39	56/18614	0.00613361	0.0384874	0.0231747	PRKCQ/BCL2	2
BP	GO:0032535	regulation of cellular component size	4/39	354/18614	0.00625961	0.0390584	0.0235186	AKT3/SPTAN1/MTOR/GSN	4
BP	GO:0001541	ovarian follicle development	2/39	57/18614	0.00634828	0.0390584	0.0235186	BCL2/ATM	2
BP	GO:0002931	response to ischemia	2/39	57/18614	0.00634828	0.0390584	0.0235186	BCL2/TP53	2
BP	GO:0043470	regulation of carbohydrate catabolic process	2/39	57/18614	0.00634828	0.0390584	0.0235186	TP53/MTOR	2
BP	GO:0043666	regulation of phosphoprotein phosphatase activity	2/39	57/18614	0.00634828	0.0390584	0.0235186	MTOR/IKBKB	2
BP	GO:0048016	inositol phosphate-mediated signaling	2/39	57/18614	0.00634828	0.0390584	0.0235186	PPP3CC/MTOR	2
BP	GO:0030042	actin filament depolymerization	2/39	58/18614	0.00656635	0.0401395	0.0241695	SPTAN1/GSN	2
BP	GO:0090311	regulation of protein deacetylation	2/39	58/18614	0.00656635	0.0401395	0.0241695	TP53/FNTA	2
BP	GO:0042770	signal transduction in response to DNA damage	3/39	184/18614	0.0066873	0.0407474	0.0245356	ATM/TP53/CHEK2	3
BP	GO:0001961	positive regulation of cytokine-mediated signaling pathway	2/39	59/18614	0.00678781	0.0410955	0.0247452	TRAF2/IL1R1	2
BP	GO:0046324	regulation of glucose import	2/39	59/18614	0.00678781	0.0410955	0.0247452	PIK3R1/APPL1	2
BP	GO:0019748	secondary metabolic process	2/39	60/18614	0.00701263	0.0420536	0.0253221	BCL2/APPL1	2
BP	GO:0032007	negative regulation of TOR signaling	2/39	60/18614	0.00701263	0.0420536	0.0253221	ATM/ENDOG	2
BP	GO:0038202	TORC1 signaling	2/39	60/18614	0.00701263	0.0420536	0.0253221	ATM/MTOR	2
BP	GO:0000075	cell cycle checkpoint signaling	3/39	188/18614	0.0070946	0.0424109	0.0255373	ATM/TP53/CHEK2	3
BP	GO:0002221	pattern recognition receptor signaling pathway	3/39	189/18614	0.00719868	0.0426128	0.0256588	BIRC3/APPL1/IRAK3	3
BP	GO:0002700	regulation of production of molecular mediator of immune response	3/39	189/18614	0.00719868	0.0426128	0.0256588	TRAF2/IRAK3/IL1R1	3
BP	GO:0006839	mitochondrial transport	3/39	189/18614	0.00719868	0.0426128	0.0256588	BCL2/TP53/MAPK8	3
BP	GO:0046854	phosphatidylinositol phosphate biosynthetic process	2/39	61/18614	0.00724081	0.0426128	0.0256588	ATM/PIK3R1	2
BP	GO:1904356	regulation of telomere maintenance via telomere lengthening	2/39	61/18614	0.00724081	0.0426128	0.0256588	PRKCQ/ATM	2
BP	GO:0002822	regulation of adaptive immune response based on somatic recombination of immune receptors built from immunoglobulin superfamily domains	3/39	190/18614	0.00730368	0.0428497	0.0258015	PRKCQ/TRAF2/IL1R1	3
BP	GO:0032271	regulation of protein polymerization	3/39	191/18614	0.00740958	0.0433369	0.0260948	SPTAN1/MTOR/GSN	3
BP	GO:0045088	regulation of innate immune response	4/39	373/18614	0.00750635	0.0436919	0.0263086	BIRC3/APPL1/IKBKB/IRAK3	4
BP	GO:0008154	actin polymerization or depolymerization	3/39	192/18614	0.00751639	0.0436919	0.0263086	SPTAN1/MTOR/GSN	3
BP	GO:1901653	cellular response to peptide	4/39	375/18614	0.00764645	0.0441812	0.0266032	PRKCQ/TP53/PIK3R1/APPL1	4
BP	GO:0032623	interleukin-2 production	2/39	63/18614	0.00770717	0.0441812	0.0266032	PRKCQ/TRAF2	2
BP	GO:0032663	regulation of interleukin-2 production	2/39	63/18614	0.00770717	0.0441812	0.0266032	PRKCQ/TRAF2	2
BP	GO:2001244	positive regulation of intrinsic apoptotic signaling pathway	2/39	63/18614	0.00770717	0.0441812	0.0266032	TP53/DNM1L	2
BP	GO:1902903	regulation of supramolecular fiber organization	4/39	376/18614	0.00771714	0.0441812	0.0266032	SPTAN1/PIK3R1/MTOR/GSN	4
BP	GO:0006360	transcription by RNA polymerase I	2/39	64/18614	0.00794533	0.0453506	0.0273073	MYBBP1A/MTOR	2
BP	GO:2001233	regulation of apoptotic signaling pathway	4/39	381/18614	0.00807712	0.0457639	0.0275562	BCL2/TP53/TRAF2/DNM1L	4
BP	GO:0071897	DNA biosynthetic process	3/39	198/18614	0.00817651	0.0457639	0.0275562	PRKCQ/ATM/TP53	3
BP	GO:0010972	negative regulation of G2/M transition of mitotic cell cycle	2/39	65/18614	0.00818678	0.0457639	0.0275562	ATM/AVEN	2
BP	GO:0030837	negative regulation of actin filament polymerization	2/39	65/18614	0.00818678	0.0457639	0.0275562	SPTAN1/GSN	2
BP	GO:0030888	regulation of B cell proliferation	2/39	65/18614	0.00818678	0.0457639	0.0275562	BCL2/ATM	2
BP	GO:0032507	maintenance of protein location in cell	2/39	65/18614	0.00818678	0.0457639	0.0275562	ANKRD13C/GSN	2
BP	GO:0098781	ncRNA transcription	2/39	65/18614	0.00818678	0.0457639	0.0275562	TP53/MTOR	2
BP	GO:0000070	mitotic sister chromatid segregation	3/39	199/18614	0.00828975	0.0461154	0.0277679	ATM/CHMP7/CHEK2	3
BP	GO:0002697	regulation of immune effector process	4/39	384/18614	0.00829834	0.0461154	0.0277679	APPL1/TRAF2/IRAK3/IL1R1	4
BP	GO:0001756	somitogenesis	2/39	66/18614	0.00843152	0.0465823	0.028049	ATM/TP53	2
BP	GO:0060760	positive regulation of response to cytokine stimulus	2/39	66/18614	0.00843152	0.0465823	0.028049	TRAF2/IL1R1	2
BP	GO:0050851	antigen receptor-mediated signaling pathway	3/39	201/18614	0.00851902	0.0466823	0.0281092	BCL2/IKBKB/BMX	3
BP	GO:0097553	calcium ion transmembrane import into cytosol	3/39	201/18614	0.00851902	0.0466823	0.0281092	BCL2/FASLG/PPP3CC	3
BP	GO:0032970	regulation of actin filament-based process	4/39	387/18614	0.00852353	0.0466823	0.0281092	SPTAN1/PIK3R1/MTOR/GSN	4
BP	GO:0034605	cellular response to heat	2/39	67/18614	0.00867953	0.0471281	0.0283776	ATM/MTOR	2
BP	GO:0070613	regulation of protein processing	2/39	67/18614	0.00867953	0.0471281	0.0283776	PRKACB/GSN	2
BP	GO:1902750	negative regulation of cell cycle G2/M phase transition	2/39	67/18614	0.00867953	0.0471281	0.0283776	ATM/AVEN	2
BP	GO:0043281	regulation of cysteine-type endopeptidase activity involved in apoptotic process	3/39	204/18614	0.0088699	0.0480242	0.0289172	FASLG/BIRC3/GSN	3
BP	GO:0045670	regulation of osteoclast differentiation	2/39	68/18614	0.00893079	0.0482161	0.0290328	PIK3R1/MTOR	2
BP	GO:0000302	response to reactive oxygen species	3/39	205/18614	0.00898873	0.0482539	0.0290556	BCL2/MAPK8/ENDOG	3
BP	GO:0002819	regulation of adaptive immune response	3/39	205/18614	0.00898873	0.0482539	0.0290556	PRKCQ/TRAF2/IL1R1	3
BP	GO:0002711	positive regulation of T cell mediated immunity	2/39	69/18614	0.00918529	0.0490314	0.0295237	TRAF2/IL1R1	2
BP	GO:0007004	telomere maintenance via telomerase	2/39	69/18614	0.00918529	0.0490314	0.0295237	PRKCQ/ATM	2
BP	GO:0002224	toll-like receptor signaling pathway	2/39	70/18614	0.00944303	0.0499847	0.0300977	BIRC3/IRAK3	2
BP	GO:0032206	positive regulation of telomere maintenance	2/39	70/18614	0.00944303	0.0499847	0.0300977	PRKCQ/ATM	2
BP	GO:1901880	negative regulation of protein depolymerization	2/39	70/18614	0.00944303	0.0499847	0.0300977	SPTAN1/GSN	2
BP	GO:0046474	glycerophospholipid biosynthetic process	3/39	210/18614	0.00959693	0.0506579	0.0305031	ATM/PIK3R1/BMX	3
BP	GO:1903317	regulation of protein maturation	2/39	71/18614	0.00970397	0.0508896	0.0306426	PRKACB/GSN	2
BP	GO:0006338	chromatin remodeling	4/39	402/18614	0.00970995	0.0508896	0.0306426	MYBBP1A/TP53/SATB1/ZNF304	4
BP	GO:0032869	cellular response to insulin stimulus	3/39	211/18614	0.0097214	0.0508896	0.0306426	PRKCQ/PIK3R1/APPL1	3
BP	GO:0046626	regulation of insulin receptor signaling pathway	2/39	72/18614	0.00996812	0.051637	0.0310926	PRKCQ/PIK3R1	2
BP	GO:0051926	negative regulation of calcium ion transport	2/39	72/18614	0.00996812	0.051637	0.0310926	BCL2/PPP3CC	2
BP	GO:0090307	mitotic spindle assembly	2/39	72/18614	0.00996812	0.051637	0.0310926	CHMP7/CHEK2	2
BP	GO:0050821	protein stabilization	3/39	213/18614	0.00997317	0.051637	0.0310926	TP53/PIK3R1/CHEK2	3
BP	GO:0009615	response to virus	4/39	408/18614	0.0102133	0.052707	0.0317369	BCL2/MAP3K14/IKBKB/IRAK3	4
BP	GO:0030032	lamellipodium assembly	2/39	73/18614	0.0102354	0.052707	0.0317369	PIK3R1/MTOR	2
BP	GO:1903578	regulation of ATP metabolic process	2/39	74/18614	0.010506	0.0538075	0.0323996	DNM1L/MTOR	2
BP	GO:2000573	positive regulation of DNA biosynthetic process	2/39	74/18614	0.010506	0.0538075	0.0323996	PRKCQ/ATM	2
BP	GO:0007179	transforming growth factor beta receptor signaling pathway	3/39	218/18614	0.0106192	0.054241	0.0326606	TP53/APPL1/FNTA	3
BP	GO:0006278	RNA-templated DNA biosynthetic process	2/39	75/18614	0.0107796	0.0547651	0.0329762	PRKCQ/ATM	2
BP	GO:0046323	glucose import	2/39	75/18614	0.0107796	0.0547651	0.0329762	PIK3R1/APPL1	2
BP	GO:0001558	regulation of cell growth	4/39	420/18614	0.0112703	0.057105	0.0343851	PRKCQ/BCL2/TP53/MTOR	4
BP	GO:0010827	regulation of glucose transmembrane transport	2/39	77/18614	0.0113364	0.057134	0.0344026	PIK3R1/APPL1	2
BP	GO:0050853	B cell receptor signaling pathway	2/39	77/18614	0.0113364	0.057134	0.0344026	BCL2/BMX	2
BP	GO:0002220	innate immune response activating cell surface receptor signaling pathway	2/39	78/18614	0.0116194	0.0584052	0.0351681	APPL1/IKBKB	2
BP	GO:0016032	viral process	4/39	426/18614	0.0118245	0.0591248	0.0356013	BCL2/CHMP7/TP53/GSN	4
BP	GO:0002685	regulation of leukocyte migration	3/39	227/18614	0.0118424	0.0591248	0.0356013	PIK3R1/DNM1L/IL1R1	3
BP	GO:0019362	pyridine nucleotide metabolic process	2/39	79/18614	0.0119056	0.0591248	0.0356013	TP53/MTOR	2
BP	GO:0046496	nicotinamide nucleotide metabolic process	2/39	79/18614	0.0119056	0.0591248	0.0356013	TP53/MTOR	2
BP	GO:0043434	response to peptide hormone	4/39	427/18614	0.0119186	0.0591248	0.0356013	PRKCQ/PIK3R1/APPL1/MTOR	4
BP	GO:0002720	positive regulation of cytokine production involved in immune response	2/39	80/18614	0.0121948	0.0600238	0.0361427	TRAF2/IL1R1	2
BP	GO:0032272	negative regulation of protein polymerization	2/39	80/18614	0.0121948	0.0600238	0.0361427	SPTAN1/GSN	2
BP	GO:0042440	pigment metabolic process	2/39	80/18614	0.0121948	0.0600238	0.0361427	BCL2/APPL1	2
BP	GO:0071241	cellular response to inorganic substance	3/39	231/18614	0.012411	0.0609299	0.0366882	MAPK8/ENDOG/TRAF2	3
BP	GO:0010833	telomere maintenance via telomere lengthening	2/39	81/18614	0.0124871	0.061145	0.0368178	PRKCQ/ATM	2
BP	GO:0006979	response to oxidative stress	4/39	434/18614	0.0125905	0.061492	0.0370267	BCL2/TP53/MAPK8/ENDOG	4
BP	GO:0051651	maintenance of location in cell	3/39	233/18614	0.0127012	0.0616358	0.0371133	FASLG/ANKRD13C/GSN	3
BP	GO:0010921	regulation of phosphatase activity	2/39	82/18614	0.0127825	0.0616358	0.0371133	MTOR/IKBKB	2
BP	GO:0050848	regulation of calcium-mediated signaling	2/39	82/18614	0.0127825	0.0616358	0.0371133	PPP3CC/MTOR	2
BP	GO:0051149	positive regulation of muscle cell differentiation	2/39	82/18614	0.0127825	0.0616358	0.0371133	BCL2/MTOR	2
BP	GO:2001021	negative regulation of response to DNA damage stimulus	2/39	82/18614	0.0127825	0.0616358	0.0371133	BCL2/CHEK2	2
BP	GO:2000116	regulation of cysteine-type endopeptidase activity	3/39	234/18614	0.0128478	0.0617931	0.037208	FASLG/BIRC3/GSN	3
BP	GO:0034764	positive regulation of transmembrane transport	3/39	235/18614	0.0129953	0.0623444	0.03754	PPP3CC/PIK3R1/APPL1	3
BP	GO:0031349	positive regulation of defense response	4/39	441/18614	0.0132863	0.0634525	0.0382072	BIRC3/APPL1/IKBKB/IRAK3	4
BP	GO:0051403	stress-activated MAPK cascade	3/39	237/18614	0.0132932	0.0634525	0.0382072	MAPK8/TRAF2/IKBKB	3
BP	GO:0051303	establishment of chromosome localization	2/39	84/18614	0.0133824	0.0637179	0.038367	ATM/CHMP7	2
BP	GO:0050670	regulation of lymphocyte proliferation	3/39	239/18614	0.0135951	0.0645681	0.038879	PRKCQ/BCL2/ATM	3
BP	GO:0072524	pyridine-containing compound metabolic process	2/39	85/18614	0.0136869	0.0648418	0.0390438	TP53/MTOR	2
BP	GO:0097529	myeloid leukocyte migration	3/39	241/18614	0.0139009	0.0654802	0.0394281	PIK3R1/DNM1L/IL1R1	3
BP	GO:0006970	response to osmotic stress	2/39	86/18614	0.0139944	0.0654802	0.0394281	TP53/MTOR	2
BP	GO:0033077	T cell differentiation in thymus	2/39	86/18614	0.0139944	0.0654802	0.0394281	BCL2/TP53	2
BP	GO:0061053	somite development	2/39	86/18614	0.0139944	0.0654802	0.0394281	ATM/TP53	2
BP	GO:1901879	regulation of protein depolymerization	2/39	86/18614	0.0139944	0.0654802	0.0394281	SPTAN1/GSN	2
BP	GO:0032944	regulation of mononuclear cell proliferation	3/39	243/18614	0.0142106	0.0663276	0.0399384	PRKCQ/BCL2/ATM	3
BP	GO:0090502	RNA phosphodiester bond hydrolysis, endonucleolytic	2/39	87/18614	0.0143049	0.0666041	0.0401049	EXOG/ENDOG	2
BP	GO:0031098	stress-activated protein kinase signaling cascade	3/39	245/18614	0.0145242	0.0670749	0.0403884	MAPK8/TRAF2/IKBKB	3
BP	GO:0090305	nucleic acid phosphodiester bond hydrolysis	3/39	245/18614	0.0145242	0.0670749	0.0403884	EXOG/ENDOG/DFFB	3
BP	GO:0072594	establishment of protein localization to organelle	4/39	453/18614	0.0145359	0.0670749	0.0403884	TP53/MAPK8/PIK3R1/APPL1	4
BP	GO:0031058	positive regulation of histone modification	2/39	88/18614	0.0146184	0.0670749	0.0403884	MYBBP1A/TP53	2
BP	GO:0035304	regulation of protein dephosphorylation	2/39	88/18614	0.0146184	0.0670749	0.0403884	MTOR/IKBKB	2
BP	GO:0051453	regulation of intracellular pH	2/39	88/18614	0.0146184	0.0670749	0.0403884	BCL2/FASLG	2
BP	GO:0006816	calcium ion transport	4/39	455/18614	0.0147512	0.0675205	0.0406567	BCL2/FASLG/PPP3CC/DNM1L	4
BP	GO:0060047	heart contraction	3/39	247/18614	0.0148417	0.0677713	0.0408077	DNM1L/MTOR/GSN	3
BP	GO:0033555	multicellular organismal response to stress	2/39	90/18614	0.0152543	0.0693121	0.0417355	BCL2/MTOR	2
BP	GO:0000819	sister chromatid segregation	3/39	250/18614	0.0153255	0.0693121	0.0417355	ATM/CHMP7/CHEK2	3
BP	GO:0033044	regulation of chromosome organization	3/39	250/18614	0.0153255	0.0693121	0.0417355	PRKCQ/ATM/ZNF304	3
BP	GO:0045017	glycerolipid biosynthetic process	3/39	250/18614	0.0153255	0.0693121	0.0417355	ATM/PIK3R1/BMX	3
BP	GO:0097581	lamellipodium organization	2/39	91/18614	0.0155767	0.0702804	0.0423185	PIK3R1/MTOR	2
BP	GO:0002831	regulation of response to biotic stimulus	4/39	463/18614	0.0156327	0.0703657	0.0423699	BIRC3/APPL1/IKBKB/IRAK3	4
BP	GO:0000422	autophagy of mitochondrion	2/39	92/18614	0.0159019	0.0709039	0.042694	TP53/DNM1L	2
BP	GO:0045185	maintenance of protein location	2/39	92/18614	0.0159019	0.0709039	0.042694	ANKRD13C/GSN	2
BP	GO:0050000	chromosome localization	2/39	92/18614	0.0159019	0.0709039	0.042694	ATM/CHMP7	2
BP	GO:0061726	mitochondrion disassembly	2/39	92/18614	0.0159019	0.0709039	0.042694	TP53/DNM1L	2
BP	GO:0008654	phospholipid biosynthetic process	3/39	255/18614	0.0161515	0.0716926	0.0431689	ATM/PIK3R1/BMX	3
BP	GO:0030641	regulation of cellular pH	2/39	93/18614	0.0162301	0.0716926	0.0431689	BCL2/FASLG	2
BP	GO:0034644	cellular response to UV	2/39	93/18614	0.0162301	0.0716926	0.0431689	TP53/PIK3R1	2
BP	GO:0061912	selective autophagy	2/39	93/18614	0.0162301	0.0716926	0.0431689	ATM/TP53	2
BP	GO:0051492	regulation of stress fiber assembly	2/39	94/18614	0.0165613	0.0729851	0.0439471	PIK3R1/MTOR	2
BP	GO:0003015	heart process	3/39	259/18614	0.0168301	0.0739978	0.0445569	DNM1L/MTOR/GSN	3
BP	GO:0045807	positive regulation of endocytosis	2/39	96/18614	0.0172321	0.0754155	0.0454106	PPP3CC/APPL1	2
BP	GO:0048477	oogenesis	2/39	96/18614	0.0172321	0.0754155	0.0454106	BCL2/ATM	2
BP	GO:0002709	regulation of T cell mediated immunity	2/39	97/18614	0.0175719	0.0761984	0.045882	TRAF2/IL1R1	2
BP	GO:0007032	endosome organization	2/39	97/18614	0.0175719	0.0761984	0.045882	FASLG/CHMP7	2
BP	GO:0051153	regulation of striated muscle cell differentiation	2/39	97/18614	0.0175719	0.0761984	0.045882	BCL2/MTOR	2
BP	GO:0060993	kidney morphogenesis	2/39	97/18614	0.0175719	0.0761984	0.045882	BCL2/PRKX	2
BP	GO:0036473	cell death in response to oxidative stress	2/39	99/18614	0.0182599	0.0790012	0.0475697	BCL2/ENDOG	2
BP	GO:0070663	regulation of leukocyte proliferation	3/39	268/18614	0.0184152	0.0794915	0.0478649	PRKCQ/BCL2/ATM	3
BP	GO:0002683	negative regulation of immune system process	4/39	487/18614	0.0184757	0.0795715	0.047913	ATM/PIK3R1/APPL1/IRAK3	4
BP	GO:0035282	segmentation	2/39	100/18614	0.0186082	0.0799603	0.0481472	ATM/TP53	2
BP	GO:0007040	lysosome organization	2/39	101/18614	0.0189593	0.0809185	0.0487241	CHMP7/MTOR	2
BP	GO:0010389	regulation of G2/M transition of mitotic cell cycle	2/39	101/18614	0.0189593	0.0809185	0.0487241	ATM/AVEN	2
BP	GO:0080171	lytic vacuole organization	2/39	101/18614	0.0189593	0.0809185	0.0487241	CHMP7/MTOR	2
BP	GO:0090066	regulation of anatomical structure size	4/39	492/18614	0.0191061	0.0813619	0.0489911	AKT3/SPTAN1/MTOR/GSN	4
BP	GO:0008585	female gonad development	2/39	102/18614	0.0193132	0.081511	0.0490809	BCL2/ATM	2
BP	GO:0030316	osteoclast differentiation	2/39	102/18614	0.0193132	0.081511	0.0490809	PIK3R1/MTOR	2
BP	GO:1904063	negative regulation of cation transmembrane transport	2/39	102/18614	0.0193132	0.081511	0.0490809	BCL2/PPP3CC	2
BP	GO:1905477	positive regulation of protein localization to membrane	2/39	102/18614	0.0193132	0.081511	0.0490809	MAPK8/PIK3R1	2
BP	GO:0016049	cell growth	4/39	495/18614	0.0194907	0.0817419	0.04922	PRKCQ/BCL2/TP53/MTOR	4
BP	GO:0071560	cellular response to transforming growth factor beta stimulus	3/39	274/18614	0.0195168	0.0817419	0.04922	TP53/APPL1/FNTA	3
BP	GO:0001667	ameboidal-type cell migration	4/39	496/18614	0.01962	0.0817419	0.04922	PRKX/AKT3/APPL1/MTOR	4
BP	GO:0006885	regulation of pH	2/39	103/18614	0.0196698	0.0817419	0.04922	BCL2/FASLG	2
BP	GO:0042100	B cell proliferation	2/39	103/18614	0.0196698	0.0817419	0.04922	BCL2/ATM	2
BP	GO:0150115	cell-substrate junction organization	2/39	103/18614	0.0196698	0.0817419	0.04922	BCL2/PIK3R1	2
BP	GO:1903076	regulation of protein localization to plasma membrane	2/39	103/18614	0.0196698	0.0817419	0.04922	PIK3R1/APPL1	2
BP	GO:0048285	organelle fission	4/39	497/18614	0.0197498	0.0817903	0.0492491	ATM/CHMP7/DNM1L/CHEK2	4
BP	GO:0032204	regulation of telomere maintenance	2/39	104/18614	0.0200293	0.0817903	0.0492491	PRKCQ/ATM	2
BP	GO:0110020	regulation of actomyosin structure organization	2/39	104/18614	0.0200293	0.0817903	0.0492491	PIK3R1/MTOR	2
BP	GO:0071559	response to transforming growth factor beta	3/39	280/18614	0.0206544	0.0817903	0.0492491	TP53/APPL1/FNTA	3
BP	GO:0046545	development of primary female sexual characteristics	2/39	106/18614	0.0207565	0.0817903	0.0492491	BCL2/ATM	2
BP	GO:0016559	peroxisome fission	1/39	10/18614	0.0207605	0.0817903	0.0492491	DNM1L	1
BP	GO:0030242	autophagy of peroxisome	1/39	10/18614	0.0207605	0.0817903	0.0492491	ATM	1
BP	GO:0032070	regulation of deoxyribonuclease activity	1/39	10/18614	0.0207605	0.0817903	0.0492491	DFFA	1
BP	GO:0043653	mitochondrial fragmentation involved in apoptotic process	1/39	10/18614	0.0207605	0.0817903	0.0492491	DNM1L	1
BP	GO:0044351	macropinocytosis	1/39	10/18614	0.0207605	0.0817903	0.0492491	APPL1	1
BP	GO:0045793	positive regulation of cell size	1/39	10/18614	0.0207605	0.0817903	0.0492491	AKT3	1
BP	GO:0051409	response to nitrosative stress	1/39	10/18614	0.0207605	0.0817903	0.0492491	ATM	1
BP	GO:0051974	negative regulation of telomerase activity	1/39	10/18614	0.0207605	0.0817903	0.0492491	TP53	1
BP	GO:0060368	regulation of Fc receptor mediated stimulatory signaling pathway	1/39	10/18614	0.0207605	0.0817903	0.0492491	APPL1	1
BP	GO:0071233	cellular response to leucine	1/39	10/18614	0.0207605	0.0817903	0.0492491	MTOR	1
BP	GO:0071340	skeletal muscle acetylcholine-gated channel clustering	1/39	10/18614	0.0207605	0.0817903	0.0492491	FNTA	1
BP	GO:0090220	chromosome localization to nuclear envelope involved in homologous chromosome segregation	1/39	10/18614	0.0207605	0.0817903	0.0492491	ATM	1
BP	GO:1901620	regulation of smoothened signaling pathway involved in dorsal/ventral neural tube patterning	1/39	10/18614	0.0207605	0.0817903	0.0492491	PRKACB	1
BP	GO:1901838	positive regulation of transcription of nucleolar large rRNA by RNA polymerase I	1/39	10/18614	0.0207605	0.0817903	0.0492491	MTOR	1
BP	GO:1902884	positive regulation of response to oxidative stress	1/39	10/18614	0.0207605	0.0817903	0.0492491	ENDOG	1
BP	GO:1904896	ESCRT complex disassembly	1/39	10/18614	0.0207605	0.0817903	0.0492491	CHMP7	1
BP	GO:1904903	ESCRT III complex disassembly	1/39	10/18614	0.0207605	0.0817903	0.0492491	CHMP7	1
BP	GO:2000563	positive regulation of CD4-positive, alpha-beta T cell proliferation	1/39	10/18614	0.0207605	0.0817903	0.0492491	PRKCQ	1
BP	GO:2000659	regulation of interleukin-1-mediated signaling pathway	1/39	10/18614	0.0207605	0.0817903	0.0492491	IL1R1	1
BP	GO:2001269	positive regulation of cysteine-type endopeptidase activity involved in apoptotic signaling pathway	1/39	10/18614	0.0207605	0.0817903	0.0492491	GSN	1
BP	GO:0045165	cell fate commitment	3/39	281/18614	0.0208475	0.0819629	0.049353	BCL2/TP53/MTOR	3
BP	GO:0014013	regulation of gliogenesis	2/39	108/18614	0.0214946	0.0841575	0.0506745	TP53/MTOR	2
BP	GO:0032231	regulation of actin filament bundle assembly	2/39	108/18614	0.0214946	0.0841575	0.0506745	PIK3R1/MTOR	2
BP	GO:0072659	protein localization to plasma membrane	3/39	285/18614	0.02163	0.0845132	0.0508886	PIK3R1/APPL1/IKBKB	3
BP	GO:0140014	mitotic nuclear division	3/39	286/18614	0.0218281	0.0845701	0.0509229	ATM/CHMP7/CHEK2	3
BP	GO:0030038	contractile actin filament bundle assembly	2/39	109/18614	0.0218677	0.0845701	0.0509229	PIK3R1/MTOR	2
BP	GO:0034766	negative regulation of monoatomic ion transmembrane transport	2/39	109/18614	0.0218677	0.0845701	0.0509229	BCL2/PPP3CC	2
BP	GO:0043149	stress fiber assembly	2/39	109/18614	0.0218677	0.0845701	0.0509229	PIK3R1/MTOR	2
BP	GO:0120034	positive regulation of plasma membrane bounded cell projection assembly	2/39	109/18614	0.0218677	0.0845701	0.0509229	PIK3R1/MTOR	2
BP	GO:0009408	response to heat	2/39	110/18614	0.0222436	0.0846012	0.0509416	ATM/MTOR	2
BP	GO:0018958	phenol-containing compound metabolic process	2/39	111/18614	0.0226221	0.0846012	0.0509416	BCL2/APPL1	2
BP	GO:0007406	negative regulation of neuroblast proliferation	1/39	11/18614	0.0228133	0.0846012	0.0509416	TP53	1
BP	GO:0014889	muscle atrophy	1/39	11/18614	0.0228133	0.0846012	0.0509416	GSN	1
BP	GO:0021548	pons development	1/39	11/18614	0.0228133	0.0846012	0.0509416	BCL2	1
BP	GO:0030002	intracellular monoatomic anion homeostasis	1/39	11/18614	0.0228133	0.0846012	0.0509416	FASLG	1
BP	GO:0030644	intracellular chloride ion homeostasis	1/39	11/18614	0.0228133	0.0846012	0.0509416	FASLG	1
BP	GO:0034350	regulation of glial cell apoptotic process	1/39	11/18614	0.0228133	0.0846012	0.0509416	TRAF2	1
BP	GO:0034397	telomere localization	1/39	11/18614	0.0228133	0.0846012	0.0509416	ATM	1
BP	GO:0042989	sequestering of actin monomers	1/39	11/18614	0.0228133	0.0846012	0.0509416	GSN	1
BP	GO:0048742	regulation of skeletal muscle fiber development	1/39	11/18614	0.0228133	0.0846012	0.0509416	BCL2	1
BP	GO:0051469	vesicle fusion with vacuole	1/39	11/18614	0.0228133	0.0846012	0.0509416	CHMP7	1
BP	GO:0061418	regulation of transcription from RNA polymerase II promoter in response to hypoxia	1/39	11/18614	0.0228133	0.0846012	0.0509416	TP53	1
BP	GO:0061763	multivesicular body-lysosome fusion	1/39	11/18614	0.0228133	0.0846012	0.0509416	CHMP7	1
BP	GO:0071044	histone mRNA catabolic process	1/39	11/18614	0.0228133	0.0846012	0.0509416	ATM	1
BP	GO:0090527	actin filament reorganization	1/39	11/18614	0.0228133	0.0846012	0.0509416	GSN	1
BP	GO:0097400	interleukin-17-mediated signaling pathway	1/39	11/18614	0.0228133	0.0846012	0.0509416	TRAF2	1
BP	GO:1905651	regulation of artery morphogenesis	1/39	11/18614	0.0228133	0.0846012	0.0509416	AKT3	1
BP	GO:1905665	positive regulation of calcium ion import across plasma membrane	1/39	11/18614	0.0228133	0.0846012	0.0509416	PPP3CC	1
BP	GO:1990440	positive regulation of transcription from RNA polymerase II promoter in response to endoplasmic reticulum stress	1/39	11/18614	0.0228133	0.0846012	0.0509416	TP53	1
BP	GO:2000672	negative regulation of motor neuron apoptotic process	1/39	11/18614	0.0228133	0.0846012	0.0509416	BCL2	1
BP	GO:1904659	glucose transmembrane transport	2/39	114/18614	0.0237738	0.0879908	0.0529826	PIK3R1/APPL1	2
BP	GO:0006650	glycerophospholipid metabolic process	3/39	297/18614	0.0240738	0.0885589	0.0533247	ATM/PIK3R1/BMX	3
BP	GO:0022037	metencephalon development	2/39	115/18614	0.0241629	0.0885589	0.0533247	BCL2/TP53	2
BP	GO:0035710	CD4-positive, alpha-beta T cell activation	2/39	115/18614	0.0241629	0.0885589	0.0533247	PRKCQ/MTOR	2
BP	GO:0051261	protein depolymerization	2/39	115/18614	0.0241629	0.0885589	0.0533247	SPTAN1/GSN	2
BP	GO:0006476	protein deacetylation	2/39	116/18614	0.0245547	0.0885589	0.0533247	TP53/FNTA	2
BP	GO:0002327	immature B cell differentiation	1/39	12/18614	0.0248619	0.0885589	0.0533247	ATM	1
BP	GO:0002645	positive regulation of tolerance induction	1/39	12/18614	0.0248619	0.0885589	0.0533247	IRAK3	1
BP	GO:0006983	ER overload response	1/39	12/18614	0.0248619	0.0885589	0.0533247	TP53	1
BP	GO:0010936	negative regulation of macrophage cytokine production	1/39	12/18614	0.0248619	0.0885589	0.0533247	IRAK3	1
BP	GO:0018342	protein prenylation	1/39	12/18614	0.0248619	0.0885589	0.0533247	FNTA	1
BP	GO:0048548	regulation of pinocytosis	1/39	12/18614	0.0248619	0.0885589	0.0533247	APPL1	1
BP	GO:0051095	regulation of helicase activity	1/39	12/18614	0.0248619	0.0885589	0.0533247	TP53	1
BP	GO:0051549	positive regulation of keratinocyte migration	1/39	12/18614	0.0248619	0.0885589	0.0533247	MTOR	1
BP	GO:0060831	smoothened signaling pathway involved in dorsal/ventral neural tube patterning	1/39	12/18614	0.0248619	0.0885589	0.0533247	PRKACB	1
BP	GO:0090309	positive regulation of DNA methylation-dependent heterochromatin formation	1/39	12/18614	0.0248619	0.0885589	0.0533247	ZNF304	1
BP	GO:0097048	dendritic cell apoptotic process	1/39	12/18614	0.0248619	0.0885589	0.0533247	BCL2	1
BP	GO:0097354	prenylation	1/39	12/18614	0.0248619	0.0885589	0.0533247	FNTA	1
BP	GO:0097576	vacuole fusion	1/39	12/18614	0.0248619	0.0885589	0.0533247	CHMP7	1
BP	GO:1901030	positive regulation of mitochondrial outer membrane permeabilization involved in apoptotic signaling pathway	1/39	12/18614	0.0248619	0.0885589	0.0533247	MAPK8	1
BP	GO:2000668	regulation of dendritic cell apoptotic process	1/39	12/18614	0.0248619	0.0885589	0.0533247	BCL2	1
BP	GO:0008645	hexose transmembrane transport	2/39	117/18614	0.0249492	0.0887029	0.0534114	PIK3R1/APPL1	2
BP	GO:0006302	double-strand break repair	3/39	303/18614	0.0253499	0.0897906	0.0540664	ATM/TP53/CHEK2	3
BP	GO:0051054	positive regulation of DNA metabolic process	3/39	303/18614	0.0253499	0.0897906	0.0540664	PRKCQ/ATM/ENDOG	3
BP	GO:0034504	protein localization to nucleus	3/39	304/18614	0.0255661	0.0903875	0.0544258	TP53/PIK3R1/APPL1	3
BP	GO:0002286	T cell activation involved in immune response	2/39	119/18614	0.0257458	0.0906845	0.0546047	TP53/MTOR	2
BP	GO:0046632	alpha-beta T cell differentiation	2/39	119/18614	0.0257458	0.0906845	0.0546047	BCL2/MTOR	2
BP	GO:0015749	monosaccharide transmembrane transport	2/39	120/18614	0.026148	0.0909063	0.0547382	PIK3R1/APPL1	2
BP	GO:0043200	response to amino acid	2/39	120/18614	0.026148	0.0909063	0.0547382	BCL2/MTOR	2
BP	GO:0071375	cellular response to peptide hormone stimulus	3/39	308/18614	0.0264409	0.0909063	0.0547382	PRKCQ/PIK3R1/APPL1	3
BP	GO:0051222	positive regulation of protein transport	3/39	309/18614	0.0266621	0.0909063	0.0547382	MAPK8/PIK3R1/DNM1L	3
BP	GO:0006264	mitochondrial DNA replication	1/39	13/18614	0.0269063	0.0909063	0.0547382	ENDOG	1
BP	GO:0032494	response to peptidoglycan	1/39	13/18614	0.0269063	0.0909063	0.0547382	IRAK3	1
BP	GO:0034380	high-density lipoprotein particle assembly	1/39	13/18614	0.0269063	0.0909063	0.0547382	PRKACB	1
BP	GO:0035437	maintenance of protein localization in endoplasmic reticulum	1/39	13/18614	0.0269063	0.0909063	0.0547382	ANKRD13C	1
BP	GO:0036462	TRAIL-activated apoptotic signaling pathway	1/39	13/18614	0.0269063	0.0909063	0.0547382	TNFRSF10A	1
BP	GO:0051481	negative regulation of cytosolic calcium ion concentration	1/39	13/18614	0.0269063	0.0909063	0.0547382	BCL2	1
BP	GO:0070234	positive regulation of T cell apoptotic process	1/39	13/18614	0.0269063	0.0909063	0.0547382	TP53	1
BP	GO:0070243	regulation of thymocyte apoptotic process	1/39	13/18614	0.0269063	0.0909063	0.0547382	TP53	1
BP	GO:0070424	regulation of nucleotide-binding oligomerization domain containing signaling pathway	1/39	13/18614	0.0269063	0.0909063	0.0547382	BIRC3	1
BP	GO:0071236	cellular response to antibiotic	1/39	13/18614	0.0269063	0.0909063	0.0547382	TP53	1
BP	GO:0071481	cellular response to X-ray	1/39	13/18614	0.0269063	0.0909063	0.0547382	ATM	1
BP	GO:0071801	regulation of podosome assembly	1/39	13/18614	0.0269063	0.0909063	0.0547382	GSN	1
BP	GO:1900103	positive regulation of endoplasmic reticulum unfolded protein response	1/39	13/18614	0.0269063	0.0909063	0.0547382	PIK3R1	1
BP	GO:1901298	regulation of hydrogen peroxide-mediated programmed cell death	1/39	13/18614	0.0269063	0.0909063	0.0547382	ENDOG	1
BP	GO:1901524	regulation of mitophagy	1/39	13/18614	0.0269063	0.0909063	0.0547382	TP53	1
BP	GO:1903265	positive regulation of tumor necrosis factor-mediated signaling pathway	1/39	13/18614	0.0269063	0.0909063	0.0547382	TRAF2	1
BP	GO:1990253	cellular response to leucine starvation	1/39	13/18614	0.0269063	0.0909063	0.0547382	MTOR	1
BP	GO:2000105	positive regulation of DNA-templated DNA replication	1/39	13/18614	0.0269063	0.0909063	0.0547382	ENDOG	1
BP	GO:0002698	negative regulation of immune effector process	2/39	122/18614	0.0269601	0.0909063	0.0547382	APPL1/IRAK3	2
BP	GO:0046660	female sex differentiation	2/39	122/18614	0.0269601	0.0909063	0.0547382	BCL2/ATM	2
BP	GO:0002761	regulation of myeloid leukocyte differentiation	2/39	123/18614	0.0273699	0.0921244	0.0554717	PIK3R1/MTOR	2
BP	GO:0043280	positive regulation of cysteine-type endopeptidase activity involved in apoptotic process	2/39	124/18614	0.0277823	0.0933467	0.0562077	FASLG/GSN	2
BP	GO:0001952	regulation of cell-matrix adhesion	2/39	125/18614	0.0281973	0.094406	0.0568455	BCL2/PIK3R1	2
BP	GO:0002456	T cell mediated immunity	2/39	125/18614	0.0281973	0.094406	0.0568455	TRAF2/IL1R1	2
BP	GO:0002708	positive regulation of lymphocyte mediated immunity	2/39	126/18614	0.0286147	0.0946998	0.0570224	TRAF2/IL1R1	2
BP	GO:0007281	germ cell development	3/39	319/18614	0.0289294	0.0946998	0.0570224	BCL2/ATM/MTOR	3
BP	GO:0043201	response to leucine	1/39	14/18614	0.0289466	0.0946998	0.0570224	MTOR	1
BP	GO:0046761	viral budding from plasma membrane	1/39	14/18614	0.0289466	0.0946998	0.0570224	CHMP7	1
BP	GO:0048388	endosomal lumen acidification	1/39	14/18614	0.0289466	0.0946998	0.0570224	FASLG	1
BP	GO:0051127	positive regulation of actin nucleation	1/39	14/18614	0.0289466	0.0946998	0.0570224	GSN	1
BP	GO:0051547	regulation of keratinocyte migration	1/39	14/18614	0.0289466	0.0946998	0.0570224	MTOR	1
BP	GO:0072672	neutrophil extravasation	1/39	14/18614	0.0289466	0.0946998	0.0570224	IL1R1	1
BP	GO:1903798	regulation of miRNA maturation	1/39	14/18614	0.0289466	0.0946998	0.0570224	TP53	1
BP	GO:1903909	regulation of receptor clustering	1/39	14/18614	0.0289466	0.0946998	0.0570224	GSN	1
BP	GO:2001140	positive regulation of phospholipid transport	1/39	14/18614	0.0289466	0.0946998	0.0570224	FASLG	1
BP	GO:0014902	myotube differentiation	2/39	127/18614	0.0290346	0.0946998	0.0570224	BCL2/MTOR	2
BP	GO:0035303	regulation of dephosphorylation	2/39	127/18614	0.0290346	0.0946998	0.0570224	MTOR/IKBKB	2
BP	GO:0035601	protein deacylation	2/39	127/18614	0.0290346	0.0946998	0.0570224	TP53/FNTA	2
BP	GO:0071482	cellular response to light stimulus	2/39	127/18614	0.0290346	0.0946998	0.0570224	TP53/PIK3R1	2
BP	GO:0019058	viral life cycle	3/39	320/18614	0.0291616	0.0949507	0.0571735	BCL2/CHMP7/GSN	3
BP	GO:1904375	regulation of protein localization to cell periphery	2/39	128/18614	0.029457	0.0953813	0.0574328	PIK3R1/APPL1	2
BP	GO:1990266	neutrophil migration	2/39	128/18614	0.029457	0.0953813	0.0574328	DNM1L/IL1R1	2
BP	GO:0042542	response to hydrogen peroxide	2/39	129/18614	0.0298819	0.0953813	0.0574328	BCL2/ENDOG	2
BP	GO:0007052	mitotic spindle organization	2/39	130/18614	0.0303093	0.0953813	0.0574328	CHMP7/CHEK2	2
BP	GO:0050864	regulation of B cell activation	2/39	130/18614	0.0303093	0.0953813	0.0574328	BCL2/ATM	2
BP	GO:0070585	protein localization to mitochondrion	2/39	130/18614	0.0303093	0.0953813	0.0574328	MAPK8/DNM1L	2
BP	GO:1904951	positive regulation of establishment of protein localization	3/39	325/18614	0.0303378	0.0953813	0.0574328	MAPK8/PIK3R1/DNM1L	3
BP	GO:0051225	spindle assembly	2/39	131/18614	0.0307391	0.0953813	0.0574328	CHMP7/CHEK2	2
BP	GO:0098732	macromolecule deacylation	2/39	131/18614	0.0307391	0.0953813	0.0574328	TP53/FNTA	2
BP	GO:0001768	establishment of T cell polarity	1/39	15/18614	0.0309827	0.0953813	0.0574328	GSN	1
BP	GO:0006206	pyrimidine nucleobase metabolic process	1/39	15/18614	0.0309827	0.0953813	0.0574328	MTOR	1
BP	GO:0010225	response to UV-C	1/39	15/18614	0.0309827	0.0953813	0.0574328	TP53	1
BP	GO:0010421	hydrogen peroxide-mediated programmed cell death	1/39	15/18614	0.0309827	0.0953813	0.0574328	ENDOG	1
BP	GO:0031453	positive regulation of heterochromatin formation	1/39	15/18614	0.0309827	0.0953813	0.0574328	ZNF304	1
BP	GO:0033689	negative regulation of osteoblast proliferation	1/39	15/18614	0.0309827	0.0953813	0.0574328	BCL2	1
BP	GO:0043374	CD8-positive, alpha-beta T cell differentiation	1/39	15/18614	0.0309827	0.0953813	0.0574328	BCL2	1
BP	GO:0043455	regulation of secondary metabolic process	1/39	15/18614	0.0309827	0.0953813	0.0574328	APPL1	1
BP	GO:0045475	locomotor rhythm	1/39	15/18614	0.0309827	0.0953813	0.0574328	MTOR	1
BP	GO:0046753	non-lytic viral release	1/39	15/18614	0.0309827	0.0953813	0.0574328	CHMP7	1
BP	GO:0048021	regulation of melanin biosynthetic process	1/39	15/18614	0.0309827	0.0953813	0.0574328	APPL1	1
BP	GO:0048070	regulation of developmental pigmentation	1/39	15/18614	0.0309827	0.0953813	0.0574328	BCL2	1
BP	GO:0070885	negative regulation of calcineurin-NFAT signaling cascade	1/39	15/18614	0.0309827	0.0953813	0.0574328	MTOR	1
BP	GO:0070920	regulation of production of small RNA involved in gene silencing by RNA	1/39	15/18614	0.0309827	0.0953813	0.0574328	TP53	1
BP	GO:0097212	lysosomal membrane organization	1/39	15/18614	0.0309827	0.0953813	0.0574328	CHMP7	1
BP	GO:0106057	negative regulation of calcineurin-mediated signaling	1/39	15/18614	0.0309827	0.0953813	0.0574328	MTOR	1
BP	GO:0120263	positive regulation of heterochromatin organization	1/39	15/18614	0.0309827	0.0953813	0.0574328	ZNF304	1
BP	GO:0120305	regulation of pigmentation	1/39	15/18614	0.0309827	0.0953813	0.0574328	BCL2	1
BP	GO:1900376	regulation of secondary metabolite biosynthetic process	1/39	15/18614	0.0309827	0.0953813	0.0574328	APPL1	1
BP	GO:1901836	regulation of transcription of nucleolar large rRNA by RNA polymerase I	1/39	15/18614	0.0309827	0.0953813	0.0574328	MTOR	1
BP	GO:1902166	negative regulation of intrinsic apoptotic signaling pathway in response to DNA damage by p53 class mediator	1/39	15/18614	0.0309827	0.0953813	0.0574328	BCL2	1
BP	GO:2000671	regulation of motor neuron apoptotic process	1/39	15/18614	0.0309827	0.0953813	0.0574328	BCL2	1
BP	GO:2001138	regulation of phospholipid transport	1/39	15/18614	0.0309827	0.0953813	0.0574328	FASLG	1
BP	GO:0002440	production of molecular mediator of immune response	3/39	328/18614	0.0310556	0.0953813	0.0574328	TRAF2/IRAK3/IL1R1	3
BP	GO:0006913	nucleocytoplasmic transport	3/39	328/18614	0.0310556	0.0953813	0.0574328	TP53/PIK3R1/APPL1	3
BP	GO:0051169	nuclear transport	3/39	328/18614	0.0310556	0.0953813	0.0574328	TP53/PIK3R1/APPL1	3
BP	GO:0002244	hematopoietic progenitor cell differentiation	2/39	132/18614	0.0311713	0.0955819	0.0575536	BCL2/TP53	2
BP	GO:0034219	carbohydrate transmembrane transport	2/39	133/18614	0.031606	0.0967582	0.0582618	PIK3R1/APPL1	2
BP	GO:0062012	regulation of small molecule metabolic process	3/39	331/18614	0.0317823	0.0971409	0.0584923	TP53/DNM1L/MTOR	3
BP	GO:0002702	positive regulation of production of molecular mediator of immune response	2/39	134/18614	0.0320431	0.0977803	0.0588773	TRAF2/IL1R1	2
BP	GO:0043467	regulation of generation of precursor metabolites and energy	2/39	135/18614	0.0324825	0.0980606	0.059046	TP53/MTOR	2
BP	GO:0060562	epithelial tube morphogenesis	3/39	334/18614	0.0325179	0.0980606	0.059046	PRKACB/BCL2/PRKX	3
BP	GO:0001101	response to acid chemical	2/39	136/18614	0.0329244	0.0980606	0.059046	BCL2/MTOR	2
BP	GO:0006275	regulation of DNA replication	2/39	136/18614	0.0329244	0.0980606	0.059046	TP53/ENDOG	2
BP	GO:0052548	regulation of endopeptidase activity	3/39	336/18614	0.0330133	0.0980606	0.059046	FASLG/BIRC3/GSN	3
BP	GO:0001767	establishment of lymphocyte polarity	1/39	16/18614	0.0330146	0.0980606	0.059046	GSN	1
BP	GO:0002903	negative regulation of B cell apoptotic process	1/39	16/18614	0.0330146	0.0980606	0.059046	BCL2	1
BP	GO:0042159	lipoprotein catabolic process	1/39	16/18614	0.0330146	0.0980606	0.059046	ATM	1
BP	GO:0043517	positive regulation of DNA damage response, signal transduction by p53 class mediator	1/39	16/18614	0.0330146	0.0980606	0.059046	ATM	1
BP	GO:0051014	actin filament severing	1/39	16/18614	0.0330146	0.0980606	0.059046	GSN	1
BP	GO:0070230	positive regulation of lymphocyte apoptotic process	1/39	16/18614	0.0330146	0.0980606	0.059046	TP53	1
BP	GO:0071732	cellular response to nitric oxide	1/39	16/18614	0.0330146	0.0980606	0.059046	TRAF2	1
BP	GO:0097468	programmed cell death in response to reactive oxygen species	1/39	16/18614	0.0330146	0.0980606	0.059046	ENDOG	1
BP	GO:1905269	positive regulation of chromatin organization	1/39	16/18614	0.0330146	0.0980606	0.059046	ZNF304	1
BP	GO:1905664	regulation of calcium ion import across plasma membrane	1/39	16/18614	0.0330146	0.0980606	0.059046	PPP3CC	1
BP	GO:2000318	positive regulation of T-helper 17 type immune response	1/39	16/18614	0.0330146	0.0980606	0.059046	PRKCQ	1
BP	GO:2000696	regulation of epithelial cell differentiation involved in kidney development	1/39	16/18614	0.0330146	0.0980606	0.059046	PRKX	1
BP	GO:0015980	energy derivation by oxidation of organic compounds	3/39	337/18614	0.0332625	0.0986424	0.0593964	MYBBP1A/TP53/MTOR	3
BP	GO:0098813	nuclear chromosome segregation	3/39	339/18614	0.0337639	0.0999688	0.0601951	ATM/CHMP7/CHEK2	3
BP	GO:0060048	cardiac muscle contraction	2/39	138/18614	0.0338153	0.0999688	0.0601951	MTOR/GSN	2
BP	GO:0043271	negative regulation of monoatomic ion transport	2/39	140/18614	0.0347156	0.100462	0.0604919	BCL2/PPP3CC	2
BP	GO:1903008	organelle disassembly	2/39	140/18614	0.0347156	0.100462	0.0604919	TP53/DNM1L	2
BP	GO:0006089	lactate metabolic process	1/39	17/18614	0.0350424	0.100462	0.0604919	TP53	1
BP	GO:0010831	positive regulation of myotube differentiation	1/39	17/18614	0.0350424	0.100462	0.0604919	MTOR	1
BP	GO:0030889	negative regulation of B cell proliferation	1/39	17/18614	0.0350424	0.100462	0.0604919	ATM	1
BP	GO:0031573	mitotic intra-S DNA damage checkpoint signaling	1/39	17/18614	0.0350424	0.100462	0.0604919	CHEK2	1
BP	GO:0032510	endosome to lysosome transport via multivesicular body sorting pathway	1/39	17/18614	0.0350424	0.100462	0.0604919	CHMP7	1
BP	GO:0033151	V(D)J recombination	1/39	17/18614	0.0350424	0.100462	0.0604919	ATM	1
BP	GO:0035729	cellular response to hepatocyte growth factor stimulus	1/39	17/18614	0.0350424	0.100462	0.0604919	APPL1	1
BP	GO:0048311	mitochondrion distribution	1/39	17/18614	0.0350424	0.100462	0.0604919	DNM1L	1
BP	GO:0055119	relaxation of cardiac muscle	1/39	17/18614	0.0350424	0.100462	0.0604919	GSN	1
BP	GO:0060253	negative regulation of glial cell proliferation	1/39	17/18614	0.0350424	0.100462	0.0604919	TP53	1
BP	GO:0060965	negative regulation of miRNA-mediated gene silencing	1/39	17/18614	0.0350424	0.100462	0.0604919	TP53	1
BP	GO:0097396	response to interleukin-17	1/39	17/18614	0.0350424	0.100462	0.0604919	TRAF2	1
BP	GO:0097398	cellular response to interleukin-17	1/39	17/18614	0.0350424	0.100462	0.0604919	TRAF2	1
BP	GO:1901550	regulation of endothelial cell development	1/39	17/18614	0.0350424	0.100462	0.0604919	IKBKB	1
BP	GO:1902165	regulation of intrinsic apoptotic signaling pathway in response to DNA damage by p53 class mediator	1/39	17/18614	0.0350424	0.100462	0.0604919	BCL2	1
BP	GO:1903140	regulation of establishment of endothelial barrier	1/39	17/18614	0.0350424	0.100462	0.0604919	IKBKB	1
BP	GO:1904355	positive regulation of telomere capping	1/39	17/18614	0.0350424	0.100462	0.0604919	PRKCQ	1
BP	GO:2001267	regulation of cysteine-type endopeptidase activity involved in apoptotic signaling pathway	1/39	17/18614	0.0350424	0.100462	0.0604919	GSN	1
BP	GO:0031056	regulation of histone modification	2/39	141/18614	0.0351693	0.100569	0.0605563	MYBBP1A/TP53	2
BP	GO:0032496	response to lipopolysaccharide	3/39	345/18614	0.0352919	0.100569	0.0605563	FASLG/MAPK8/IRAK3	3
BP	GO:0051346	negative regulation of hydrolase activity	3/39	345/18614	0.0352919	0.100569	0.0605563	BIRC3/DFFA/IKBKB	3
BP	GO:1990778	protein localization to cell periphery	3/39	345/18614	0.0352919	0.100569	0.0605563	PIK3R1/APPL1/IKBKB	3
BP	GO:2001056	positive regulation of cysteine-type endopeptidase activity	2/39	142/18614	0.0356253	0.101366	0.0610366	FASLG/GSN	2
BP	GO:0051235	maintenance of location	3/39	347/18614	0.0358092	0.101737	0.0612596	FASLG/ANKRD13C/GSN	3
BP	GO:1903900	regulation of viral life cycle	2/39	143/18614	0.0360836	0.102363	0.0616367	BCL2/GSN	2
BP	GO:0045765	regulation of angiogenesis	3/39	349/18614	0.0363304	0.10254	0.0617434	FASLG/AKT3/ZNF304	3
BP	GO:0050671	positive regulation of lymphocyte proliferation	2/39	145/18614	0.0370072	0.10254	0.0617434	PRKCQ/BCL2	2
BP	GO:0002295	T-helper cell lineage commitment	1/39	18/18614	0.037066	0.10254	0.0617434	MTOR	1
BP	GO:0002693	positive regulation of cellular extravasation	1/39	18/18614	0.037066	0.10254	0.0617434	IL1R1	1
BP	GO:0002827	positive regulation of T-helper 1 type immune response	1/39	18/18614	0.037066	0.10254	0.0617434	IL1R1	1
BP	GO:0010522	regulation of calcium ion transport into cytosol	1/39	18/18614	0.037066	0.10254	0.0617434	BCL2	1
BP	GO:0010663	positive regulation of striated muscle cell apoptotic process	1/39	18/18614	0.037066	0.10254	0.0617434	TP53	1
BP	GO:0010666	positive regulation of cardiac muscle cell apoptotic process	1/39	18/18614	0.037066	0.10254	0.0617434	TP53	1
BP	GO:0033033	negative regulation of myeloid cell apoptotic process	1/39	18/18614	0.037066	0.10254	0.0617434	BCL2	1
BP	GO:0036003	positive regulation of transcription from RNA polymerase II promoter in response to stress	1/39	18/18614	0.037066	0.10254	0.0617434	TP53	1
BP	GO:0046112	nucleobase biosynthetic process	1/39	18/18614	0.037066	0.10254	0.0617434	MTOR	1
BP	GO:0060149	negative regulation of post-transcriptional gene silencing	1/39	18/18614	0.037066	0.10254	0.0617434	TP53	1
BP	GO:0060967	negative regulation of gene silencing by RNA	1/39	18/18614	0.037066	0.10254	0.0617434	TP53	1
BP	GO:0061952	midbody abscission	1/39	18/18614	0.037066	0.10254	0.0617434	CHMP7	1
BP	GO:1900369	negative regulation of post-transcriptional gene silencing by RNA	1/39	18/18614	0.037066	0.10254	0.0617434	TP53	1
BP	GO:1901387	positive regulation of voltage-gated calcium channel activity	1/39	18/18614	0.037066	0.10254	0.0617434	PPP3CC	1
BP	GO:1902170	cellular response to reactive nitrogen species	1/39	18/18614	0.037066	0.10254	0.0617434	TRAF2	1
BP	GO:1901342	regulation of vasculature development	3/39	355/18614	0.0379176	0.104743	0.06307	FASLG/AKT3/ZNF304	3
BP	GO:0002705	positive regulation of leukocyte mediated immunity	2/39	148/18614	0.0384095	0.10564	0.06361	TRAF2/IL1R1	2
BP	GO:0031333	negative regulation of protein-containing complex assembly	2/39	148/18614	0.0384095	0.10564	0.06361	SPTAN1/GSN	2
BP	GO:0032946	positive regulation of mononuclear cell proliferation	2/39	148/18614	0.0384095	0.10564	0.06361	PRKCQ/BCL2	2
BP	GO:0031589	cell-substrate adhesion	3/39	359/18614	0.0389955	0.105659	0.0636214	BCL2/PRKX/PIK3R1	3
BP	GO:0002755	MyD88-dependent toll-like receptor signaling pathway	1/39	19/18614	0.0390855	0.105659	0.0636214	IRAK3	1
BP	GO:0032695	negative regulation of interleukin-12 production	1/39	19/18614	0.0390855	0.105659	0.0636214	IRAK3	1
BP	GO:0035728	response to hepatocyte growth factor	1/39	19/18614	0.0390855	0.105659	0.0636214	APPL1	1
BP	GO:0035743	CD4-positive, alpha-beta T cell cytokine production	1/39	19/18614	0.0390855	0.105659	0.0636214	IL1R1	1
BP	GO:0048266	behavioral response to pain	1/39	19/18614	0.0390855	0.105659	0.0636214	MTOR	1
BP	GO:0051900	regulation of mitochondrial depolarization	1/39	19/18614	0.0390855	0.105659	0.0636214	BCL2	1
BP	GO:0071800	podosome assembly	1/39	19/18614	0.0390855	0.105659	0.0636214	GSN	1
BP	GO:0090308	regulation of DNA methylation-dependent heterochromatin formation	1/39	19/18614	0.0390855	0.105659	0.0636214	ZNF304	1
BP	GO:1900242	regulation of synaptic vesicle endocytosis	1/39	19/18614	0.0390855	0.105659	0.0636214	PPP3CC	1
BP	GO:1901522	positive regulation of transcription from RNA polymerase II promoter involved in cellular response to chemical stimulus	1/39	19/18614	0.0390855	0.105659	0.0636214	TP53	1
BP	GO:2000774	positive regulation of cellular senescence	1/39	19/18614	0.0390855	0.105659	0.0636214	TP53	1
BP	GO:0070588	calcium ion transmembrane transport	3/39	360/18614	0.0392674	0.106	0.0638265	BCL2/FASLG/PPP3CC	3
BP	GO:2000377	regulation of reactive oxygen species metabolic process	2/39	150/18614	0.0393557	0.106087	0.063879	BCL2/TP53	2
BP	GO:0010675	regulation of cellular carbohydrate metabolic process	2/39	152/18614	0.0403108	0.108175	0.0651364	TP53/MTOR	2
BP	GO:0034614	cellular response to reactive oxygen species	2/39	152/18614	0.0403108	0.108175	0.0651364	MAPK8/ENDOG	2
BP	GO:0007292	female gamete generation	2/39	153/18614	0.0407916	0.108175	0.0651364	BCL2/ATM	2
BP	GO:0034763	negative regulation of transmembrane transport	2/39	153/18614	0.0407916	0.108175	0.0651364	BCL2/PPP3CC	2
BP	GO:0002237	response to molecule of bacterial origin	3/39	366/18614	0.0409195	0.108175	0.0651364	FASLG/MAPK8/IRAK3	3
BP	GO:0045860	positive regulation of protein kinase activity	3/39	366/18614	0.0409195	0.108175	0.0651364	TNFRSF10A/TRAF2/MTOR	3
BP	GO:0002643	regulation of tolerance induction	1/39	20/18614	0.0411008	0.108175	0.0651364	IRAK3	1
BP	GO:0008334	histone mRNA metabolic process	1/39	20/18614	0.0411008	0.108175	0.0651364	ATM	1
BP	GO:0010940	positive regulation of necrotic cell death	1/39	20/18614	0.0411008	0.108175	0.0651364	TP53	1
BP	GO:0039535	regulation of RIG-I signaling pathway	1/39	20/18614	0.0411008	0.108175	0.0651364	BIRC3	1
BP	GO:0048643	positive regulation of skeletal muscle tissue development	1/39	20/18614	0.0411008	0.108175	0.0651364	BCL2	1
BP	GO:0051546	keratinocyte migration	1/39	20/18614	0.0411008	0.108175	0.0651364	MTOR	1
BP	GO:0055064	chloride ion homeostasis	1/39	20/18614	0.0411008	0.108175	0.0651364	FASLG	1
BP	GO:0097284	hepatocyte apoptotic process	1/39	20/18614	0.0411008	0.108175	0.0651364	GSN	1
BP	GO:1900227	positive regulation of NLRP3 inflammasome complex assembly	1/39	20/18614	0.0411008	0.108175	0.0651364	MAPK8	1
BP	GO:1903978	regulation of microglial cell activation	1/39	20/18614	0.0411008	0.108175	0.0651364	ATM	1
BP	GO:2000269	regulation of fibroblast apoptotic process	1/39	20/18614	0.0411008	0.108175	0.0651364	TP53	1
BP	GO:0010038	response to metal ion	3/39	367/18614	0.0411983	0.108208	0.0651565	BCL2/MAPK8/ENDOG	3
BP	GO:0016050	vesicle organization	3/39	368/18614	0.041478	0.108208	0.0651565	BCL2/FASLG/CHMP7	3
BP	GO:0090316	positive regulation of intracellular protein transport	2/39	155/18614	0.0417599	0.108208	0.0651565	MAPK8/PIK3R1	2
BP	GO:0018108	peptidyl-tyrosine phosphorylation	3/39	370/18614	0.0420404	0.108208	0.0651565	TP53/MTOR/BMX	3
BP	GO:0000723	telomere maintenance	2/39	156/18614	0.0422473	0.108208	0.0651565	PRKCQ/ATM	2
BP	GO:0008643	carbohydrate transport	2/39	156/18614	0.0422473	0.108208	0.0651565	PIK3R1/APPL1	2
BP	GO:0097530	granulocyte migration	2/39	156/18614	0.0422473	0.108208	0.0651565	DNM1L/IL1R1	2
BP	GO:2001236	regulation of extrinsic apoptotic signaling pathway	2/39	156/18614	0.0422473	0.108208	0.0651565	BCL2/TRAF2	2
BP	GO:0010631	epithelial cell migration	3/39	371/18614	0.042323	0.108208	0.0651565	PRKX/AKT3/MTOR	3
BP	GO:0018212	peptidyl-tyrosine modification	3/39	372/18614	0.0426067	0.108208	0.0651565	TP53/MTOR/BMX	3
BP	GO:0001678	intracellular glucose homeostasis	2/39	157/18614	0.0427369	0.108208	0.0651565	ENDOG/PIK3R1	2
BP	GO:0030902	hindbrain development	2/39	157/18614	0.0427369	0.108208	0.0651565	BCL2/TP53	2
BP	GO:0048592	eye morphogenesis	2/39	157/18614	0.0427369	0.108208	0.0651565	BCL2/FASLG	2
BP	GO:0002902	regulation of B cell apoptotic process	1/39	21/18614	0.0431121	0.108208	0.0651565	BCL2	1
BP	GO:0010224	response to UV-B	1/39	21/18614	0.0431121	0.108208	0.0651565	BCL2	1
BP	GO:0034122	negative regulation of toll-like receptor signaling pathway	1/39	21/18614	0.0431121	0.108208	0.0651565	IRAK3	1
BP	GO:0036092	phosphatidylinositol-3-phosphate biosynthetic process	1/39	21/18614	0.0431121	0.108208	0.0651565	ATM	1
BP	GO:0042790	nucleolar large rRNA transcription by RNA polymerase I	1/39	21/18614	0.0431121	0.108208	0.0651565	MTOR	1
BP	GO:0043373	CD4-positive, alpha-beta T cell lineage commitment	1/39	21/18614	0.0431121	0.108208	0.0651565	MTOR	1
BP	GO:0045063	T-helper 1 cell differentiation	1/39	21/18614	0.0431121	0.108208	0.0651565	MTOR	1
BP	GO:0045821	positive regulation of glycolytic process	1/39	21/18614	0.0431121	0.108208	0.0651565	MTOR	1
BP	GO:0050765	negative regulation of phagocytosis	1/39	21/18614	0.0431121	0.108208	0.0651565	APPL1	1
BP	GO:0050849	negative regulation of calcium-mediated signaling	1/39	21/18614	0.0431121	0.108208	0.0651565	MTOR	1
BP	GO:0051882	mitochondrial depolarization	1/39	21/18614	0.0431121	0.108208	0.0651565	BCL2	1
BP	GO:0060546	negative regulation of necroptotic process	1/39	21/18614	0.0431121	0.108208	0.0651565	BIRC3	1
BP	GO:0070584	mitochondrion morphogenesis	1/39	21/18614	0.0431121	0.108208	0.0651565	DNM1L	1
BP	GO:0070886	positive regulation of calcineurin-NFAT signaling cascade	1/39	21/18614	0.0431121	0.108208	0.0651565	PPP3CC	1
BP	GO:0071731	response to nitric oxide	1/39	21/18614	0.0431121	0.108208	0.0651565	TRAF2	1
BP	GO:0090043	regulation of tubulin deacetylation	1/39	21/18614	0.0431121	0.108208	0.0651565	FNTA	1
BP	GO:0090141	positive regulation of mitochondrial fission	1/39	21/18614	0.0431121	0.108208	0.0651565	DNM1L	1
BP	GO:0097049	motor neuron apoptotic process	1/39	21/18614	0.0431121	0.108208	0.0651565	BCL2	1
BP	GO:0106058	positive regulation of calcineurin-mediated signaling	1/39	21/18614	0.0431121	0.108208	0.0651565	PPP3CC	1
BP	GO:1900118	negative regulation of execution phase of apoptosis	1/39	21/18614	0.0431121	0.108208	0.0651565	DFFA	1
BP	GO:1903209	positive regulation of oxidative stress-induced cell death	1/39	21/18614	0.0431121	0.108208	0.0651565	ENDOG	1
BP	GO:1903429	regulation of cell maturation	1/39	21/18614	0.0431121	0.108208	0.0651565	BCL2	1
BP	GO:0090132	epithelium migration	3/39	374/18614	0.0431768	0.108214	0.0651599	PRKX/AKT3/MTOR	3
BP	GO:0090501	RNA phosphodiester bond hydrolysis	2/39	158/18614	0.0432286	0.108214	0.0651599	EXOG/ENDOG	2
BP	GO:0006644	phospholipid metabolic process	3/39	375/18614	0.0434634	0.108658	0.0654274	ATM/PIK3R1/BMX	3
BP	GO:0090130	tissue migration	3/39	379/18614	0.0446192	0.109757	0.0660891	PRKX/AKT3/MTOR	3
BP	GO:0051017	actin filament bundle assembly	2/39	161/18614	0.0447165	0.109757	0.0660891	PIK3R1/MTOR	2
BP	GO:0051147	regulation of muscle cell differentiation	2/39	161/18614	0.0447165	0.109757	0.0660891	BCL2/MTOR	2
BP	GO:1902850	microtubule cytoskeleton organization involved in mitosis	2/39	161/18614	0.0447165	0.109757	0.0660891	CHMP7/CHEK2	2
BP	GO:0002223	stimulatory C-type lectin receptor signaling pathway	1/39	22/18614	0.0451192	0.109757	0.0660891	IKBKB	1
BP	GO:0006907	pinocytosis	1/39	22/18614	0.0451192	0.109757	0.0660891	APPL1	1
BP	GO:0023019	signal transduction involved in regulation of gene expression	1/39	22/18614	0.0451192	0.109757	0.0660891	TRAF2	1
BP	GO:0032069	regulation of nuclease activity	1/39	22/18614	0.0451192	0.109757	0.0660891	DFFA	1
BP	GO:0032516	positive regulation of phosphoprotein phosphatase activity	1/39	22/18614	0.0451192	0.109757	0.0660891	MTOR	1
BP	GO:0032780	negative regulation of ATP-dependent activity	1/39	22/18614	0.0451192	0.109757	0.0660891	TP53	1
BP	GO:0035313	wound healing, spreading of epidermal cells	1/39	22/18614	0.0451192	0.109757	0.0660891	MTOR	1
BP	GO:0035739	CD4-positive, alpha-beta T cell proliferation	1/39	22/18614	0.0451192	0.109757	0.0660891	PRKCQ	1
BP	GO:0046597	negative regulation of viral entry into host cell	1/39	22/18614	0.0451192	0.109757	0.0660891	GSN	1
BP	GO:0055081	monoatomic anion homeostasis	1/39	22/18614	0.0451192	0.109757	0.0660891	FASLG	1
BP	GO:0062099	negative regulation of programmed necrotic cell death	1/39	22/18614	0.0451192	0.109757	0.0660891	BIRC3	1
BP	GO:1901386	negative regulation of voltage-gated calcium channel activity	1/39	22/18614	0.0451192	0.109757	0.0660891	PPP3CC	1
BP	GO:1902774	late endosome to lysosome transport	1/39	22/18614	0.0451192	0.109757	0.0660891	CHMP7	1
BP	GO:1990840	response to lectin	1/39	22/18614	0.0451192	0.109757	0.0660891	IKBKB	1
BP	GO:1990858	cellular response to lectin	1/39	22/18614	0.0451192	0.109757	0.0660891	IKBKB	1
BP	GO:2000561	regulation of CD4-positive, alpha-beta T cell proliferation	1/39	22/18614	0.0451192	0.109757	0.0660891	PRKCQ	1
BP	GO:2000810	regulation of bicellular tight junction assembly	1/39	22/18614	0.0451192	0.109757	0.0660891	IKBKB	1
BP	GO:0016052	carbohydrate catabolic process	2/39	162/18614	0.0452167	0.109853	0.066147	TP53/MTOR	2
BP	GO:0030307	positive regulation of cell growth	2/39	164/18614	0.0462234	0.112155	0.067533	BCL2/MTOR	2
BP	GO:0046486	glycerolipid metabolic process	3/39	385/18614	0.0463818	0.112176	0.0675457	ATM/PIK3R1/BMX	3
BP	GO:0050792	regulation of viral process	2/39	165/18614	0.0467298	0.112176	0.0675457	BCL2/GSN	2
BP	GO:0061572	actin filament bundle organization	2/39	165/18614	0.0467298	0.112176	0.0675457	PIK3R1/MTOR	2
BP	GO:0003091	renal water homeostasis	1/39	23/18614	0.0471222	0.112176	0.0675457	PRKACB	1
BP	GO:0006925	inflammatory cell apoptotic process	1/39	23/18614	0.0471222	0.112176	0.0675457	FASLG	1
BP	GO:0021904	dorsal/ventral neural tube patterning	1/39	23/18614	0.0471222	0.112176	0.0675457	PRKACB	1
BP	GO:0031065	positive regulation of histone deacetylation	1/39	23/18614	0.0471222	0.112176	0.0675457	TP53	1
BP	GO:0039702	viral budding via host ESCRT complex	1/39	23/18614	0.0471222	0.112176	0.0675457	CHMP7	1
BP	GO:0060396	growth hormone receptor signaling pathway	1/39	23/18614	0.0471222	0.112176	0.0675457	PIK3R1	1
BP	GO:0071378	cellular response to growth hormone stimulus	1/39	23/18614	0.0471222	0.112176	0.0675457	PIK3R1	1
BP	GO:0090042	tubulin deacetylation	1/39	23/18614	0.0471222	0.112176	0.0675457	FNTA	1
BP	GO:1901673	regulation of mitotic spindle assembly	1/39	23/18614	0.0471222	0.112176	0.0675457	CHMP7	1
BP	GO:1902254	negative regulation of intrinsic apoptotic signaling pathway by p53 class mediator	1/39	23/18614	0.0471222	0.112176	0.0675457	BCL2	1
BP	GO:2000178	negative regulation of neural precursor cell proliferation	1/39	23/18614	0.0471222	0.112176	0.0675457	TP53	1
BP	GO:2000353	positive regulation of endothelial cell apoptotic process	1/39	23/18614	0.0471222	0.112176	0.0675457	FASLG	1
BP	GO:0030856	regulation of epithelial cell differentiation	2/39	166/18614	0.0472384	0.112176	0.0675457	PRKX/IKBKB	2
BP	GO:0070665	positive regulation of leukocyte proliferation	2/39	166/18614	0.0472384	0.112176	0.0675457	PRKCQ/BCL2	2
BP	GO:2001022	positive regulation of response to DNA damage stimulus	2/39	167/18614	0.047749	0.113247	0.0681903	ATM/ENDOG	2
BP	GO:0140694	non-membrane-bounded organelle assembly	3/39	390/18614	0.047877	0.113409	0.0682878	CHMP7/CHEK2/GSN	3
BP	GO:0050900	leukocyte migration	3/39	393/18614	0.0487856	0.115204	0.0693686	PIK3R1/DNM1L/IL1R1	3
BP	GO:0002320	lymphoid progenitor cell differentiation	1/39	24/18614	0.0491212	0.115204	0.0693686	BCL2	1
BP	GO:0032515	negative regulation of phosphoprotein phosphatase activity	1/39	24/18614	0.0491212	0.115204	0.0693686	IKBKB	1
BP	GO:0042438	melanin biosynthetic process	1/39	24/18614	0.0491212	0.115204	0.0693686	APPL1	1
BP	GO:0140747	regulation of ncRNA transcription	1/39	24/18614	0.0491212	0.115204	0.0693686	MTOR	1
BP	GO:1900543	negative regulation of purine nucleotide metabolic process	1/39	24/18614	0.0491212	0.115204	0.0693686	TP53	1
BP	GO:1901863	positive regulation of muscle tissue development	1/39	24/18614	0.0491212	0.115204	0.0693686	BCL2	1
BP	GO:1902410	mitotic cytokinetic process	1/39	24/18614	0.0491212	0.115204	0.0693686	CHMP7	1
BP	GO:0007254	JNK cascade	2/39	170/18614	0.049293	0.115464	0.0695252	MAPK8/TRAF2	2
BP	GO:0010950	positive regulation of endopeptidase activity	2/39	171/18614	0.0498117	0.116391	0.0700835	FASLG/GSN	2
BP	GO:1902905	positive regulation of supramolecular fiber organization	2/39	171/18614	0.0498117	0.116391	0.0700835	MTOR/GSN	2
BP	GO:0007178	transmembrane receptor protein serine/threonine kinase signaling pathway	3/39	398/18614	0.0503189	0.117128	0.0705273	TP53/APPL1/FNTA	3
BP	GO:0006007	glucose catabolic process	1/39	25/18614	0.051116	0.117128	0.0705273	TP53	1
BP	GO:0017121	plasma membrane phospholipid scrambling	1/39	25/18614	0.051116	0.117128	0.0705273	FASLG	1
BP	GO:0030318	melanocyte differentiation	1/39	25/18614	0.051116	0.117128	0.0705273	BCL2	1
BP	GO:0031468	nuclear membrane reassembly	1/39	25/18614	0.051116	0.117128	0.0705273	CHMP7	1
BP	GO:0031579	membrane raft organization	1/39	25/18614	0.051116	0.117128	0.0705273	GSN	1
BP	GO:0043153	entrainment of circadian clock by photoperiod	1/39	25/18614	0.051116	0.117128	0.0705273	TP53	1
BP	GO:0045980	negative regulation of nucleotide metabolic process	1/39	25/18614	0.051116	0.117128	0.0705273	TP53	1
BP	GO:0046641	positive regulation of alpha-beta T cell proliferation	1/39	25/18614	0.051116	0.117128	0.0705273	PRKCQ	1
BP	GO:0048714	positive regulation of oligodendrocyte differentiation	1/39	25/18614	0.051116	0.117128	0.0705273	MTOR	1
BP	GO:0051016	barbed-end actin filament capping	1/39	25/18614	0.051116	0.117128	0.0705273	GSN	1
BP	GO:0060333	type II interferon-mediated signaling pathway	1/39	25/18614	0.051116	0.117128	0.0705273	TP53	1
BP	GO:0070423	nucleotide-binding oligomerization domain containing signaling pathway	1/39	25/18614	0.051116	0.117128	0.0705273	BIRC3	1
BP	GO:0090023	positive regulation of neutrophil chemotaxis	1/39	25/18614	0.051116	0.117128	0.0705273	DNM1L	1
BP	GO:2000001	regulation of DNA damage checkpoint	1/39	25/18614	0.051116	0.117128	0.0705273	CHEK2	1
BP	GO:2000114	regulation of establishment of cell polarity	1/39	25/18614	0.051116	0.117128	0.0705273	GSN	1
BP	GO:0010634	positive regulation of epithelial cell migration	2/39	176/18614	0.0524351	0.11938	0.0718833	AKT3/MTOR	2
BP	GO:0002433	immune response-regulating cell surface receptor signaling pathway involved in phagocytosis	1/39	26/18614	0.0531068	0.11938	0.0718833	APPL1	1
BP	GO:0010954	positive regulation of protein processing	1/39	26/18614	0.0531068	0.11938	0.0718833	GSN	1
BP	GO:0032469	endoplasmic reticulum calcium ion homeostasis	1/39	26/18614	0.0531068	0.11938	0.0718833	BCL2	1
BP	GO:0034377	plasma lipoprotein particle assembly	1/39	26/18614	0.0531068	0.11938	0.0718833	PRKACB	1
BP	GO:0035872	nucleotide-binding domain, leucine rich repeat containing receptor signaling pathway	1/39	26/18614	0.0531068	0.11938	0.0718833	BIRC3	1
BP	GO:0035994	response to muscle stretch	1/39	26/18614	0.0531068	0.11938	0.0718833	GSN	1
BP	GO:0038096	Fc-gamma receptor signaling pathway involved in phagocytosis	1/39	26/18614	0.0531068	0.11938	0.0718833	APPL1	1
BP	GO:0044346	fibroblast apoptotic process	1/39	26/18614	0.0531068	0.11938	0.0718833	TP53	1
BP	GO:0044550	secondary metabolite biosynthetic process	1/39	26/18614	0.0531068	0.11938	0.0718833	APPL1	1
BP	GO:1901028	regulation of mitochondrial outer membrane permeabilization involved in apoptotic signaling pathway	1/39	26/18614	0.0531068	0.11938	0.0718833	MAPK8	1
BP	GO:1903421	regulation of synaptic vesicle recycling	1/39	26/18614	0.0531068	0.11938	0.0718833	PPP3CC	1
BP	GO:1903901	negative regulation of viral life cycle	1/39	26/18614	0.0531068	0.11938	0.0718833	GSN	1
BP	GO:1904262	negative regulation of TORC1 signaling	1/39	26/18614	0.0531068	0.11938	0.0718833	ATM	1
BP	GO:2000647	negative regulation of stem cell proliferation	1/39	26/18614	0.0531068	0.11938	0.0718833	TP53	1
BP	GO:2000773	negative regulation of cellular senescence	1/39	26/18614	0.0531068	0.11938	0.0718833	AKT3	1
BP	GO:0008361	regulation of cell size	2/39	178/18614	0.0534982	0.120117	0.0723273	AKT3/MTOR	2
BP	GO:0001783	B cell apoptotic process	1/39	27/18614	0.0550935	0.121287	0.0730318	BCL2	1
BP	GO:0009651	response to salt stress	1/39	27/18614	0.0550935	0.121287	0.0730318	TP53	1
BP	GO:0019228	neuronal action potential	1/39	27/18614	0.0550935	0.121287	0.0730318	MTOR	1
BP	GO:0032511	late endosome to vacuole transport via multivesicular body sorting pathway	1/39	27/18614	0.0550935	0.121287	0.0730318	CHMP7	1
BP	GO:0032740	positive regulation of interleukin-17 production	1/39	27/18614	0.0550935	0.121287	0.0730318	PRKCQ	1
BP	GO:0032753	positive regulation of interleukin-4 production	1/39	27/18614	0.0550935	0.121287	0.0730318	PRKCQ	1
BP	GO:0034143	regulation of toll-like receptor 4 signaling pathway	1/39	27/18614	0.0550935	0.121287	0.0730318	APPL1	1
BP	GO:0039529	RIG-I signaling pathway	1/39	27/18614	0.0550935	0.121287	0.0730318	BIRC3	1
BP	GO:0045815	transcription initiation-coupled chromatin remodeling	1/39	27/18614	0.0550935	0.121287	0.0730318	TP53	1
BP	GO:0046755	viral budding	1/39	27/18614	0.0550935	0.121287	0.0730318	CHMP7	1
BP	GO:0048641	regulation of skeletal muscle tissue development	1/39	27/18614	0.0550935	0.121287	0.0730318	BCL2	1
BP	GO:0060547	negative regulation of necrotic cell death	1/39	27/18614	0.0550935	0.121287	0.0730318	BIRC3	1
BP	GO:0099558	maintenance of synapse structure	1/39	27/18614	0.0550935	0.121287	0.0730318	APPL1	1
BP	GO:1904666	regulation of ubiquitin protein ligase activity	1/39	27/18614	0.0550935	0.121287	0.0730318	DNM1L	1
BP	GO:1905564	positive regulation of vascular endothelial cell proliferation	1/39	27/18614	0.0550935	0.121287	0.0730318	AKT3	1
BP	GO:2000108	positive regulation of leukocyte apoptotic process	1/39	27/18614	0.0550935	0.121287	0.0730318	TP53	1
BP	GO:0050731	positive regulation of peptidyl-tyrosine phosphorylation	2/39	181/18614	0.0551073	0.121287	0.0730318	TP53/MTOR	2
BP	GO:0050727	regulation of inflammatory response	3/39	414/18614	0.0553837	0.121754	0.0733129	ATM/BIRC3/IL1R1	3
BP	GO:0006941	striated muscle contraction	2/39	182/18614	0.0556475	0.122192	0.0735768	MTOR/GSN	2
BP	GO:0006109	regulation of carbohydrate metabolic process	2/39	183/18614	0.0561896	0.122955	0.0740362	TP53/MTOR	2
BP	GO:0009266	response to temperature stimulus	2/39	183/18614	0.0561896	0.122955	0.0740362	ATM/MTOR	2
BP	GO:0061025	membrane fusion	2/39	183/18614	0.0561896	0.122955	0.0740362	CHMP7/DNM1L	2
BP	GO:0002706	regulation of lymphocyte mediated immunity	2/39	184/18614	0.0567336	0.123066	0.0741031	TRAF2/IL1R1	2
BP	GO:0032104	regulation of response to extracellular stimulus	1/39	28/18614	0.0570761	0.123066	0.0741031	BCL2	1
BP	GO:0032107	regulation of response to nutrient levels	1/39	28/18614	0.0570761	0.123066	0.0741031	BCL2	1
BP	GO:0032878	regulation of establishment or maintenance of cell polarity	1/39	28/18614	0.0570761	0.123066	0.0741031	GSN	1
BP	GO:0036037	CD8-positive, alpha-beta T cell activation	1/39	28/18614	0.0570761	0.123066	0.0741031	BCL2	1
BP	GO:0051647	nucleus localization	1/39	28/18614	0.0570761	0.123066	0.0741031	MTOR	1
BP	GO:0060402	calcium ion transport into cytosol	1/39	28/18614	0.0570761	0.123066	0.0741031	BCL2	1
BP	GO:0071624	positive regulation of granulocyte chemotaxis	1/39	28/18614	0.0570761	0.123066	0.0741031	DNM1L	1
BP	GO:0150146	cell junction disassembly	1/39	28/18614	0.0570761	0.123066	0.0741031	PIK3R1	1
BP	GO:1903319	positive regulation of protein maturation	1/39	28/18614	0.0570761	0.123066	0.0741031	GSN	1
BP	GO:0010952	positive regulation of peptidase activity	2/39	185/18614	0.0572795	0.123066	0.0741031	FASLG/GSN	2
BP	GO:0032640	tumor necrosis factor production	2/39	185/18614	0.0572795	0.123066	0.0741031	PIK3R1/IRAK3	2
BP	GO:0032680	regulation of tumor necrosis factor production	2/39	185/18614	0.0572795	0.123066	0.0741031	PIK3R1/IRAK3	2
BP	GO:0044000	movement in host	2/39	185/18614	0.0572795	0.123066	0.0741031	CHMP7/GSN	2
BP	GO:0045766	positive regulation of angiogenesis	2/39	185/18614	0.0572795	0.123066	0.0741031	AKT3/ZNF304	2
BP	GO:1904018	positive regulation of vasculature development	2/39	185/18614	0.0572795	0.123066	0.0741031	AKT3/ZNF304	2
BP	GO:0030099	myeloid cell differentiation	3/39	421/18614	0.0576745	0.123775	0.0745296	PRKX/PIK3R1/MTOR	3
BP	GO:0043405	regulation of MAP kinase activity	2/39	186/18614	0.0578272	0.123822	0.0745581	TRAF2/IRAK3	2
BP	GO:1903169	regulation of calcium ion transmembrane transport	2/39	186/18614	0.0578272	0.123822	0.0745581	BCL2/PPP3CC	2
BP	GO:0003002	regionalization	3/39	422/18614	0.0580054	0.124064	0.0747034	PRKACB/ATM/TP53	3
BP	GO:0019722	calcium-mediated signaling	2/39	187/18614	0.0583768	0.124205	0.0747886	PPP3CC/MTOR	2
BP	GO:0032200	telomere organization	2/39	187/18614	0.0583768	0.124205	0.0747886	PRKCQ/ATM	2
BP	GO:0040029	epigenetic regulation of gene expression	2/39	188/18614	0.0589282	0.124205	0.0747886	TP53/ZNF304	2
BP	GO:0052547	regulation of peptidase activity	3/39	425/18614	0.0590037	0.124205	0.0747886	FASLG/BIRC3/GSN	3
BP	GO:0001778	plasma membrane repair	1/39	29/18614	0.0590547	0.124205	0.0747886	CHMP7	1
BP	GO:0009648	photoperiodism	1/39	29/18614	0.0590547	0.124205	0.0747886	TP53	1
BP	GO:0010458	exit from mitosis	1/39	29/18614	0.0590547	0.124205	0.0747886	CHMP7	1
BP	GO:0019076	viral release from host cell	1/39	29/18614	0.0590547	0.124205	0.0747886	CHMP7	1
BP	GO:0031445	regulation of heterochromatin formation	1/39	29/18614	0.0590547	0.124205	0.0747886	ZNF304	1
BP	GO:0035891	exit from host cell	1/39	29/18614	0.0590547	0.124205	0.0747886	CHMP7	1
BP	GO:0065005	protein-lipid complex assembly	1/39	29/18614	0.0590547	0.124205	0.0747886	PRKACB	1
BP	GO:0120261	regulation of heterochromatin organization	1/39	29/18614	0.0590547	0.124205	0.0747886	ZNF304	1
BP	GO:1900017	positive regulation of cytokine production involved in inflammatory response	1/39	29/18614	0.0590547	0.124205	0.0747886	APPL1	1
BP	GO:1903205	regulation of hydrogen peroxide-induced cell death	1/39	29/18614	0.0590547	0.124205	0.0747886	ENDOG	1
BP	GO:2000765	regulation of cytoplasmic translation	1/39	29/18614	0.0590547	0.124205	0.0747886	MTOR	1
BP	GO:0071466	cellular response to xenobiotic stimulus	2/39	189/18614	0.0594815	0.124964	0.0752455	TP53/CHEK2	2
BP	GO:0051495	positive regulation of cytoskeleton organization	2/39	190/18614	0.0600365	0.125712	0.075696	MTOR/GSN	2
BP	GO:0071706	tumor necrosis factor superfamily cytokine production	2/39	190/18614	0.0600365	0.125712	0.075696	PIK3R1/IRAK3	2
BP	GO:1903555	regulation of tumor necrosis factor superfamily cytokine production	2/39	190/18614	0.0600365	0.125712	0.075696	PIK3R1/IRAK3	2
BP	GO:0030308	negative regulation of cell growth	2/39	191/18614	0.0605934	0.126256	0.0760236	BCL2/TP53	2
BP	GO:0033674	positive regulation of kinase activity	3/39	430/18614	0.0606859	0.126256	0.0760236	TNFRSF10A/TRAF2/MTOR	3
BP	GO:0002507	tolerance induction	1/39	30/18614	0.0610293	0.126256	0.0760236	IRAK3	1
BP	GO:0002825	regulation of T-helper 1 type immune response	1/39	30/18614	0.0610293	0.126256	0.0760236	IL1R1	1
BP	GO:0009649	entrainment of circadian clock	1/39	30/18614	0.0610293	0.126256	0.0760236	TP53	1
BP	GO:0035066	positive regulation of histone acetylation	1/39	30/18614	0.0610293	0.126256	0.0760236	MYBBP1A	1
BP	GO:0090140	regulation of mitochondrial fission	1/39	30/18614	0.0610293	0.126256	0.0760236	DNM1L	1
BP	GO:0090330	regulation of platelet aggregation	1/39	30/18614	0.0610293	0.126256	0.0760236	PRKCQ	1
BP	GO:1900101	regulation of endoplasmic reticulum unfolded protein response	1/39	30/18614	0.0610293	0.126256	0.0760236	PIK3R1	1
BP	GO:1901798	positive regulation of signal transduction by p53 class mediator	1/39	30/18614	0.0610293	0.126256	0.0760236	ATM	1
BP	GO:1902230	negative regulation of intrinsic apoptotic signaling pathway in response to DNA damage	1/39	30/18614	0.0610293	0.126256	0.0760236	BCL2	1
BP	GO:0055001	muscle cell development	2/39	192/18614	0.0611521	0.126372	0.0760936	BCL2/MTOR	2
BP	GO:0007059	chromosome segregation	3/39	435/18614	0.0623907	0.128095	0.077131	ATM/CHMP7/CHEK2	3
BP	GO:0120032	regulation of plasma membrane bounded cell projection assembly	2/39	195/18614	0.062839	0.128095	0.077131	PIK3R1/MTOR	2
BP	GO:0010039	response to iron ion	1/39	31/18614	0.0629998	0.128095	0.077131	BCL2	1
BP	GO:0032148	activation of protein kinase B activity	1/39	31/18614	0.0629998	0.128095	0.077131	MTOR	1
BP	GO:0033688	regulation of osteoblast proliferation	1/39	31/18614	0.0629998	0.128095	0.077131	BCL2	1
BP	GO:0036258	multivesicular body assembly	1/39	31/18614	0.0629998	0.128095	0.077131	CHMP7	1
BP	GO:0040018	positive regulation of multicellular organism growth	1/39	31/18614	0.0629998	0.128095	0.077131	BCL2	1
BP	GO:0045948	positive regulation of translational initiation	1/39	31/18614	0.0629998	0.128095	0.077131	MTOR	1
BP	GO:0051491	positive regulation of filopodium assembly	1/39	31/18614	0.0629998	0.128095	0.077131	PIK3R1	1
BP	GO:0051654	establishment of mitochondrion localization	1/39	31/18614	0.0629998	0.128095	0.077131	DNM1L	1
BP	GO:0070293	renal absorption	1/39	31/18614	0.0629998	0.128095	0.077131	GSN	1
BP	GO:0071276	cellular response to cadmium ion	1/39	31/18614	0.0629998	0.128095	0.077131	MAPK8	1
BP	GO:0150117	positive regulation of cell-substrate junction organization	1/39	31/18614	0.0629998	0.128095	0.077131	PIK3R1	1
BP	GO:1900225	regulation of NLRP3 inflammasome complex assembly	1/39	31/18614	0.0629998	0.128095	0.077131	MAPK8	1
BP	GO:2000316	regulation of T-helper 17 type immune response	1/39	31/18614	0.0629998	0.128095	0.077131	PRKCQ	1
BP	GO:0022412	cellular process involved in reproduction in multicellular organism	3/39	438/18614	0.0634244	0.12882	0.0775677	BCL2/ATM/MTOR	3
BP	GO:0042060	wound healing	3/39	439/18614	0.0637708	0.129247	0.0778244	PRKCQ/CHMP7/MTOR	3
BP	GO:0045936	negative regulation of phosphate metabolic process	3/39	439/18614	0.0637708	0.129247	0.0778244	TP53/IKBKB/IRAK3	3
BP	GO:0032388	positive regulation of intracellular transport	2/39	197/18614	0.0639724	0.129379	0.0779039	MAPK8/PIK3R1	2
BP	GO:0060491	regulation of cell projection assembly	2/39	197/18614	0.0639724	0.129379	0.0779039	PIK3R1/MTOR	2
BP	GO:0009410	response to xenobiotic stimulus	3/39	440/18614	0.0641181	0.129397	0.0779149	BCL2/TP53/CHEK2	3
BP	GO:0010563	negative regulation of phosphorus metabolic process	3/39	440/18614	0.0641181	0.129397	0.0779149	TP53/IKBKB/IRAK3	3
BP	GO:0007051	spindle organization	2/39	198/18614	0.0645418	0.129591	0.0780315	CHMP7/CHEK2	2
BP	GO:0002431	Fc receptor mediated stimulatory signaling pathway	1/39	32/18614	0.0649663	0.129591	0.0780315	APPL1	1
BP	GO:0006346	DNA methylation-dependent heterochromatin formation	1/39	32/18614	0.0649663	0.129591	0.0780315	ZNF304	1
BP	GO:0008156	negative regulation of DNA replication	1/39	32/18614	0.0649663	0.129591	0.0780315	TP53	1
BP	GO:0031069	hair follicle morphogenesis	1/39	32/18614	0.0649663	0.129591	0.0780315	BCL2	1
BP	GO:0033032	regulation of myeloid cell apoptotic process	1/39	32/18614	0.0649663	0.129591	0.0780315	BCL2	1
BP	GO:0035308	negative regulation of protein dephosphorylation	1/39	32/18614	0.0649663	0.129591	0.0780315	IKBKB	1
BP	GO:0036257	multivesicular body organization	1/39	32/18614	0.0649663	0.129591	0.0780315	CHMP7	1
BP	GO:0045671	negative regulation of osteoclast differentiation	1/39	32/18614	0.0649663	0.129591	0.0780315	PIK3R1	1
BP	GO:0050891	multicellular organismal-level water homeostasis	1/39	32/18614	0.0649663	0.129591	0.0780315	PRKACB	1
BP	GO:0060544	regulation of necroptotic process	1/39	32/18614	0.0649663	0.129591	0.0780315	BIRC3	1
BP	GO:0071248	cellular response to metal ion	2/39	200/18614	0.0656857	0.130888	0.0788126	MAPK8/ENDOG	2
BP	GO:0051656	establishment of organelle localization	3/39	445/18614	0.0658678	0.131113	0.0789482	ATM/CHMP7/DNM1L	3
BP	GO:0001935	endothelial cell proliferation	2/39	201/18614	0.0662602	0.131756	0.0793352	PRKX/AKT3	2
BP	GO:0031032	actomyosin structure organization	2/39	202/18614	0.0668365	0.131977	0.0794684	PIK3R1/MTOR	2
BP	GO:0036474	cell death in response to hydrogen peroxide	1/39	33/18614	0.0669287	0.131977	0.0794684	ENDOG	1
BP	GO:0038094	Fc-gamma receptor signaling pathway	1/39	33/18614	0.0669287	0.131977	0.0794684	APPL1	1
BP	GO:0048147	negative regulation of fibroblast proliferation	1/39	33/18614	0.0669287	0.131977	0.0794684	TP53	1
BP	GO:0051204	protein insertion into mitochondrial membrane	1/39	33/18614	0.0669287	0.131977	0.0794684	MAPK8	1
BP	GO:0051497	negative regulation of stress fiber assembly	1/39	33/18614	0.0669287	0.131977	0.0794684	PIK3R1	1
BP	GO:0090169	regulation of spindle assembly	1/39	33/18614	0.0669287	0.131977	0.0794684	CHMP7	1
BP	GO:1901889	negative regulation of cell junction assembly	1/39	33/18614	0.0669287	0.131977	0.0794684	IKBKB	1
BP	GO:0000280	nuclear division	3/39	450/18614	0.0676397	0.133102	0.0801459	ATM/CHMP7/CHEK2	3
BP	GO:0031331	positive regulation of cellular catabolic process	3/39	450/18614	0.0676397	0.133102	0.0801459	ATM/ENDOG/MTOR	3
BP	GO:0001782	B cell homeostasis	1/39	34/18614	0.0688871	0.133888	0.0806193	BCL2	1
BP	GO:0009112	nucleobase metabolic process	1/39	34/18614	0.0688871	0.133888	0.0806193	MTOR	1
BP	GO:0010661	positive regulation of muscle cell apoptotic process	1/39	34/18614	0.0688871	0.133888	0.0806193	TP53	1
BP	GO:0036475	neuron death in response to oxidative stress	1/39	34/18614	0.0688871	0.133888	0.0806193	ENDOG	1
BP	GO:0044546	NLRP3 inflammasome complex assembly	1/39	34/18614	0.0688871	0.133888	0.0806193	MAPK8	1
BP	GO:0048265	response to pain	1/39	34/18614	0.0688871	0.133888	0.0806193	MTOR	1
BP	GO:0050869	negative regulation of B cell activation	1/39	34/18614	0.0688871	0.133888	0.0806193	ATM	1
BP	GO:0051973	positive regulation of telomerase activity	1/39	34/18614	0.0688871	0.133888	0.0806193	PRKCQ	1
BP	GO:0060964	regulation of miRNA-mediated gene silencing	1/39	34/18614	0.0688871	0.133888	0.0806193	TP53	1
BP	GO:0090022	regulation of neutrophil chemotaxis	1/39	34/18614	0.0688871	0.133888	0.0806193	DNM1L	1
BP	GO:0090075	relaxation of muscle	1/39	34/18614	0.0688871	0.133888	0.0806193	GSN	1
BP	GO:1901797	negative regulation of signal transduction by p53 class mediator	1/39	34/18614	0.0688871	0.133888	0.0806193	BCL2	1
BP	GO:0051701	biological process involved in interaction with host	2/39	206/18614	0.0691584	0.134278	0.0808539	CHMP7/GSN	2
BP	GO:1902115	regulation of organelle assembly	2/39	207/18614	0.0697431	0.135274	0.081454	CHMP7/GSN	2
BP	GO:0002285	lymphocyte activation involved in immune response	2/39	208/18614	0.0703294	0.135464	0.0815681	TP53/MTOR	2
BP	GO:0002719	negative regulation of cytokine production involved in immune response	1/39	35/18614	0.0708416	0.135464	0.0815681	IRAK3	1
BP	GO:0007095	mitotic G2 DNA damage checkpoint signaling	1/39	35/18614	0.0708416	0.135464	0.0815681	ATM	1
BP	GO:0007143	female meiotic nuclear division	1/39	35/18614	0.0708416	0.135464	0.0815681	ATM	1
BP	GO:0010923	negative regulation of phosphatase activity	1/39	35/18614	0.0708416	0.135464	0.0815681	IKBKB	1
BP	GO:0032205	negative regulation of telomere maintenance	1/39	35/18614	0.0708416	0.135464	0.0815681	ATM	1
BP	GO:0032633	interleukin-4 production	1/39	35/18614	0.0708416	0.135464	0.0815681	PRKCQ	1
BP	GO:0032673	regulation of interleukin-4 production	1/39	35/18614	0.0708416	0.135464	0.0815681	PRKCQ	1
BP	GO:0045879	negative regulation of smoothened signaling pathway	1/39	35/18614	0.0708416	0.135464	0.0815681	PRKACB	1
BP	GO:0060416	response to growth hormone	1/39	35/18614	0.0708416	0.135464	0.0815681	PIK3R1	1
BP	GO:0090050	positive regulation of cell migration involved in sprouting angiogenesis	1/39	35/18614	0.0708416	0.135464	0.0815681	AKT3	1
BP	GO:1901099	negative regulation of signal transduction in absence of ligand	1/39	35/18614	0.0708416	0.135464	0.0815681	BCL2	1
BP	GO:1905898	positive regulation of response to endoplasmic reticulum stress	1/39	35/18614	0.0708416	0.135464	0.0815681	PIK3R1	1
BP	GO:2001240	negative regulation of extrinsic apoptotic signaling pathway in absence of ligand	1/39	35/18614	0.0708416	0.135464	0.0815681	BCL2	1
BP	GO:0009952	anterior/posterior pattern specification	2/39	209/18614	0.0709174	0.135472	0.0815731	ATM/TP53	2
BP	GO:0000423	mitophagy	1/39	36/18614	0.072792	0.136982	0.0824821	TP53	1
BP	GO:0002474	antigen processing and presentation of peptide antigen via MHC class I	1/39	36/18614	0.072792	0.136982	0.0824821	IKBKB	1
BP	GO:0010737	protein kinase A signaling	1/39	36/18614	0.072792	0.136982	0.0824821	PRKACB	1
BP	GO:0010922	positive regulation of phosphatase activity	1/39	36/18614	0.072792	0.136982	0.0824821	MTOR	1
BP	GO:0019068	virion assembly	1/39	36/18614	0.072792	0.136982	0.0824821	CHMP7	1
BP	GO:0032232	negative regulation of actin filament bundle assembly	1/39	36/18614	0.072792	0.136982	0.0824821	PIK3R1	1
BP	GO:0033687	osteoblast proliferation	1/39	36/18614	0.072792	0.136982	0.0824821	BCL2	1
BP	GO:0048730	epidermis morphogenesis	1/39	36/18614	0.072792	0.136982	0.0824821	BCL2	1
BP	GO:0050931	pigment cell differentiation	1/39	36/18614	0.072792	0.136982	0.0824821	BCL2	1
BP	GO:0140632	inflammasome complex assembly	1/39	36/18614	0.072792	0.136982	0.0824821	MAPK8	1
BP	GO:1900368	regulation of post-transcriptional gene silencing by RNA	1/39	36/18614	0.072792	0.136982	0.0824821	TP53	1
BP	GO:1903514	release of sequestered calcium ion into cytosol by endoplasmic reticulum	1/39	36/18614	0.072792	0.136982	0.0824821	FASLG	1
BP	GO:1903580	positive regulation of ATP metabolic process	1/39	36/18614	0.072792	0.136982	0.0824821	MTOR	1
BP	GO:1903749	positive regulation of establishment of protein localization to mitochondrion	1/39	36/18614	0.072792	0.136982	0.0824821	MAPK8	1
BP	GO:2000758	positive regulation of peptidyl-lysine acetylation	1/39	36/18614	0.072792	0.136982	0.0824821	MYBBP1A	1
BP	GO:0042098	T cell proliferation	2/39	213/18614	0.0732856	0.137504	0.0827966	PRKCQ/TP53	2
BP	GO:0007389	pattern specification process	3/39	467/18614	0.073828	0.137504	0.0827966	PRKACB/ATM/TP53	3
BP	GO:0030100	regulation of endocytosis	2/39	214/18614	0.0738817	0.137504	0.0827966	PPP3CC/APPL1	2
BP	GO:0045637	regulation of myeloid cell differentiation	2/39	214/18614	0.0738817	0.137504	0.0827966	PIK3R1/MTOR	2
BP	GO:1903829	positive regulation of protein localization	3/39	468/18614	0.0741998	0.137504	0.0827966	MAPK8/PIK3R1/DNM1L	3
BP	GO:0001941	postsynaptic membrane organization	1/39	37/18614	0.0747385	0.137504	0.0827966	FNTA	1
BP	GO:0007031	peroxisome organization	1/39	37/18614	0.0747385	0.137504	0.0827966	DNM1L	1
BP	GO:0010934	macrophage cytokine production	1/39	37/18614	0.0747385	0.137504	0.0827966	IRAK3	1
BP	GO:0010935	regulation of macrophage cytokine production	1/39	37/18614	0.0747385	0.137504	0.0827966	IRAK3	1
BP	GO:0030104	water homeostasis	1/39	37/18614	0.0747385	0.137504	0.0827966	PRKACB	1
BP	GO:0034110	regulation of homotypic cell-cell adhesion	1/39	37/18614	0.0747385	0.137504	0.0827966	PRKCQ	1
BP	GO:0043162	ubiquitin-dependent protein catabolic process via the multivesicular body sorting pathway	1/39	37/18614	0.0747385	0.137504	0.0827966	CHMP7	1
BP	GO:0044319	wound healing, spreading of cells	1/39	37/18614	0.0747385	0.137504	0.0827966	MTOR	1
BP	GO:0045324	late endosome to vacuole transport	1/39	37/18614	0.0747385	0.137504	0.0827966	CHMP7	1
BP	GO:0048536	spleen development	1/39	37/18614	0.0747385	0.137504	0.0827966	BCL2	1
BP	GO:0048741	skeletal muscle fiber development	1/39	37/18614	0.0747385	0.137504	0.0827966	BCL2	1
BP	GO:0048854	brain morphogenesis	1/39	37/18614	0.0747385	0.137504	0.0827966	AKT3	1
BP	GO:0060147	regulation of post-transcriptional gene silencing	1/39	37/18614	0.0747385	0.137504	0.0827966	TP53	1
BP	GO:0072528	pyrimidine-containing compound biosynthetic process	1/39	37/18614	0.0747385	0.137504	0.0827966	MTOR	1
BP	GO:0090151	establishment of protein localization to mitochondrial membrane	1/39	37/18614	0.0747385	0.137504	0.0827966	MAPK8	1
BP	GO:0090505	epiboly involved in wound healing	1/39	37/18614	0.0747385	0.137504	0.0827966	MTOR	1
BP	GO:0097345	mitochondrial outer membrane permeabilization	1/39	37/18614	0.0747385	0.137504	0.0827966	MAPK8	1
BP	GO:2000279	negative regulation of DNA biosynthetic process	1/39	37/18614	0.0747385	0.137504	0.0827966	TP53	1
BP	GO:0007033	vacuole organization	2/39	217/18614	0.0756795	0.139101	0.0837578	CHMP7/MTOR	2
BP	GO:0001662	behavioral fear response	1/39	38/18614	0.0766809	0.139856	0.0842127	BCL2	1
BP	GO:0002183	cytoplasmic translational initiation	1/39	38/18614	0.0766809	0.139856	0.0842127	MTOR	1
BP	GO:0033028	myeloid cell apoptotic process	1/39	38/18614	0.0766809	0.139856	0.0842127	BCL2	1
BP	GO:0043618	regulation of transcription from RNA polymerase II promoter in response to stress	1/39	38/18614	0.0766809	0.139856	0.0842127	TP53	1
BP	GO:0045742	positive regulation of epidermal growth factor receptor signaling pathway	1/39	38/18614	0.0766809	0.139856	0.0842127	FASLG	1
BP	GO:0060966	regulation of gene silencing by RNA	1/39	38/18614	0.0766809	0.139856	0.0842127	TP53	1
BP	GO:0090504	epiboly	1/39	38/18614	0.0766809	0.139856	0.0842127	MTOR	1
BP	GO:1902229	regulation of intrinsic apoptotic signaling pathway in response to DNA damage	1/39	38/18614	0.0766809	0.139856	0.0842127	BCL2	1
BP	GO:0046034	ATP metabolic process	2/39	219/18614	0.0768859	0.13996	0.0842756	DNM1L/MTOR	2
BP	GO:1901215	negative regulation of neuron death	2/39	219/18614	0.0768859	0.13996	0.0842756	BCL2/TRAF2	2
BP	GO:0002209	behavioral defense response	1/39	39/18614	0.0786194	0.14216	0.0856001	BCL2	1
BP	GO:0021532	neural tube patterning	1/39	39/18614	0.0786194	0.14216	0.0856001	PRKACB	1
BP	GO:0030279	negative regulation of ossification	1/39	39/18614	0.0786194	0.14216	0.0856001	BCL2	1
BP	GO:0031281	positive regulation of cyclase activity	1/39	39/18614	0.0786194	0.14216	0.0856001	MAPK8	1
BP	GO:0042307	positive regulation of protein import into nucleus	1/39	39/18614	0.0786194	0.14216	0.0856001	PIK3R1	1
BP	GO:0045740	positive regulation of DNA replication	1/39	39/18614	0.0786194	0.14216	0.0856001	ENDOG	1
BP	GO:0060251	regulation of glial cell proliferation	1/39	39/18614	0.0786194	0.14216	0.0856001	TP53	1
BP	GO:0010810	regulation of cell-substrate adhesion	2/39	222/18614	0.0787071	0.142183	0.0856138	BCL2/PIK3R1	2
BP	GO:0051051	negative regulation of transport	3/39	483/18614	0.0798784	0.143333	0.0863064	BCL2/PPP3CC/APPL1	3
BP	GO:0033157	regulation of intracellular protein transport	2/39	224/18614	0.0799288	0.143333	0.0863064	MAPK8/PIK3R1	2
BP	GO:0050679	positive regulation of epithelial cell proliferation	2/39	225/18614	0.080542	0.143333	0.0863064	AKT3/ZNF304	2
BP	GO:0000266	mitochondrial fission	1/39	40/18614	0.080554	0.143333	0.0863064	DNM1L	1
BP	GO:0001953	negative regulation of cell-matrix adhesion	1/39	40/18614	0.080554	0.143333	0.0863064	PIK3R1	1
BP	GO:0002478	antigen processing and presentation of exogenous peptide antigen	1/39	40/18614	0.080554	0.143333	0.0863064	IKBKB	1
BP	GO:0010762	regulation of fibroblast migration	1/39	40/18614	0.080554	0.143333	0.0863064	APPL1	1
BP	GO:0030866	cortical actin cytoskeleton organization	1/39	40/18614	0.080554	0.143333	0.0863064	IKBKB	1
BP	GO:0031063	regulation of histone deacetylation	1/39	40/18614	0.080554	0.143333	0.0863064	TP53	1
BP	GO:0032506	cytokinetic process	1/39	40/18614	0.080554	0.143333	0.0863064	CHMP7	1
BP	GO:0046627	negative regulation of insulin receptor signaling pathway	1/39	40/18614	0.080554	0.143333	0.0863064	PRKCQ	1
BP	GO:0048753	pigment granule organization	1/39	40/18614	0.080554	0.143333	0.0863064	BCL2	1
BP	GO:0050850	positive regulation of calcium-mediated signaling	1/39	40/18614	0.080554	0.143333	0.0863064	PPP3CC	1
BP	GO:0051125	regulation of actin nucleation	1/39	40/18614	0.080554	0.143333	0.0863064	GSN	1
BP	GO:1901031	regulation of response to reactive oxygen species	1/39	40/18614	0.080554	0.143333	0.0863064	ENDOG	1
BP	GO:1901186	positive regulation of ERBB signaling pathway	1/39	40/18614	0.080554	0.143333	0.0863064	FASLG	1
BP	GO:0002573	myeloid leukocyte differentiation	2/39	227/18614	0.0817727	0.145301	0.0874912	PIK3R1/MTOR	2
BP	GO:0050673	epithelial cell proliferation	3/39	488/18614	0.0818131	0.145301	0.0874912	PRKX/AKT3/ZNF304	3
BP	GO:0008406	gonad development	2/39	228/18614	0.0823903	0.145403	0.0875527	BCL2/ATM	2
BP	GO:0002691	regulation of cellular extravasation	1/39	41/18614	0.0824845	0.145403	0.0875527	IL1R1	1
BP	GO:0014904	myotube cell development	1/39	41/18614	0.0824845	0.145403	0.0875527	BCL2	1
BP	GO:0032509	endosome transport via multivesicular body sorting pathway	1/39	41/18614	0.0824845	0.145403	0.0875527	CHMP7	1
BP	GO:0072595	maintenance of protein localization in organelle	1/39	41/18614	0.0824845	0.145403	0.0875527	ANKRD13C	1
BP	GO:0150077	regulation of neuroinflammatory response	1/39	41/18614	0.0824845	0.145403	0.0875527	ATM	1
BP	GO:1902275	regulation of chromatin organization	1/39	41/18614	0.0824845	0.145403	0.0875527	ZNF304	1
BP	GO:1990000	amyloid fibril formation	1/39	41/18614	0.0824845	0.145403	0.0875527	GSN	1
BP	GO:0019320	hexose catabolic process	1/39	42/18614	0.0844111	0.147973	0.0891004	TP53	1
BP	GO:0043551	regulation of phosphatidylinositol 3-kinase activity	1/39	42/18614	0.0844111	0.147973	0.0891004	PIK3R1	1
BP	GO:0045981	positive regulation of nucleotide metabolic process	1/39	42/18614	0.0844111	0.147973	0.0891004	MTOR	1
BP	GO:1900077	negative regulation of cellular response to insulin stimulus	1/39	42/18614	0.0844111	0.147973	0.0891004	PRKCQ	1
BP	GO:1900544	positive regulation of purine nucleotide metabolic process	1/39	42/18614	0.0844111	0.147973	0.0891004	MTOR	1
BP	GO:1901020	negative regulation of calcium ion transmembrane transporter activity	1/39	42/18614	0.0844111	0.147973	0.0891004	PPP3CC	1
BP	GO:0045137	development of primary sexual characteristics	2/39	233/18614	0.0855003	0.149744	0.0901667	BCL2/ATM	2
BP	GO:0034142	toll-like receptor 4 signaling pathway	1/39	43/18614	0.0863338	0.150232	0.0904605	APPL1	1
BP	GO:0043507	positive regulation of JUN kinase activity	1/39	43/18614	0.0863338	0.150232	0.0904605	TRAF2	1
BP	GO:0045687	positive regulation of glial cell differentiation	1/39	43/18614	0.0863338	0.150232	0.0904605	MTOR	1
BP	GO:0048713	regulation of oligodendrocyte differentiation	1/39	43/18614	0.0863338	0.150232	0.0904605	MTOR	1
BP	GO:0060236	regulation of mitotic spindle organization	1/39	43/18614	0.0863338	0.150232	0.0904605	CHMP7	1
BP	GO:0071763	nuclear membrane organization	1/39	43/18614	0.0863338	0.150232	0.0904605	CHMP7	1
BP	GO:1902110	positive regulation of mitochondrial membrane permeability involved in apoptotic process	1/39	43/18614	0.0863338	0.150232	0.0904605	MAPK8	1
BP	GO:0006909	phagocytosis	2/39	236/18614	0.0873835	0.151919	0.0914763	APPL1/GSN	2
BP	GO:0072593	reactive oxygen species metabolic process	2/39	237/18614	0.088014	0.152173	0.0916295	BCL2/TP53	2
BP	GO:0006509	membrane protein ectodomain proteolysis	1/39	44/18614	0.0882526	0.152173	0.0916295	PRKCQ	1
BP	GO:0030261	chromosome condensation	1/39	44/18614	0.0882526	0.152173	0.0916295	DFFB	1
BP	GO:0042596	fear response	1/39	44/18614	0.0882526	0.152173	0.0916295	BCL2	1
BP	GO:0043029	T cell homeostasis	1/39	44/18614	0.0882526	0.152173	0.0916295	BCL2	1
BP	GO:0043620	regulation of DNA-templated transcription in response to stress	1/39	44/18614	0.0882526	0.152173	0.0916295	TP53	1
BP	GO:0046640	regulation of alpha-beta T cell proliferation	1/39	44/18614	0.0882526	0.152173	0.0916295	PRKCQ	1
BP	GO:0072538	T-helper 17 type immune response	1/39	44/18614	0.0882526	0.152173	0.0916295	PRKCQ	1
BP	GO:2000516	positive regulation of CD4-positive, alpha-beta T cell activation	1/39	44/18614	0.0882526	0.152173	0.0916295	PRKCQ	1
BP	GO:0007160	cell-matrix adhesion	2/39	239/18614	0.0892793	0.153804	0.0926113	BCL2/PIK3R1	2
BP	GO:0008631	intrinsic apoptotic signaling pathway in response to oxidative stress	1/39	45/18614	0.0901674	0.154352	0.092941	BCL2	1
BP	GO:0014014	negative regulation of gliogenesis	1/39	45/18614	0.0901674	0.154352	0.092941	TP53	1
BP	GO:0030890	positive regulation of B cell proliferation	1/39	45/18614	0.0901674	0.154352	0.092941	BCL2	1
BP	GO:0140718	facultative heterochromatin formation	1/39	45/18614	0.0901674	0.154352	0.092941	ZNF304	1
BP	GO:1901021	positive regulation of calcium ion transmembrane transporter activity	1/39	45/18614	0.0901674	0.154352	0.092941	PPP3CC	1
BP	GO:1902686	mitochondrial outer membrane permeabilization involved in programmed cell death	1/39	45/18614	0.0901674	0.154352	0.092941	MAPK8	1
BP	GO:1902692	regulation of neuroblast proliferation	1/39	45/18614	0.0901674	0.154352	0.092941	TP53	1
BP	GO:0003254	regulation of membrane depolarization	1/39	46/18614	0.0920783	0.155793	0.0938091	BCL2	1
BP	GO:0007094	mitotic spindle assembly checkpoint signaling	1/39	46/18614	0.0920783	0.155793	0.0938091	ATM	1
BP	GO:0014911	positive regulation of smooth muscle cell migration	1/39	46/18614	0.0920783	0.155793	0.0938091	BCL2	1
BP	GO:0033120	positive regulation of RNA splicing	1/39	46/18614	0.0920783	0.155793	0.0938091	PIK3R1	1
BP	GO:0034331	cell junction maintenance	1/39	46/18614	0.0920783	0.155793	0.0938091	APPL1	1
BP	GO:0035305	negative regulation of dephosphorylation	1/39	46/18614	0.0920783	0.155793	0.0938091	IKBKB	1
BP	GO:0035307	positive regulation of protein dephosphorylation	1/39	46/18614	0.0920783	0.155793	0.0938091	MTOR	1
BP	GO:0042551	neuron maturation	1/39	46/18614	0.0920783	0.155793	0.0938091	BCL2	1
BP	GO:0071173	spindle assembly checkpoint signaling	1/39	46/18614	0.0920783	0.155793	0.0938091	ATM	1
BP	GO:0071174	mitotic spindle checkpoint signaling	1/39	46/18614	0.0920783	0.155793	0.0938091	ATM	1
BP	GO:0071827	plasma lipoprotein particle organization	1/39	46/18614	0.0920783	0.155793	0.0938091	PRKACB	1
BP	GO:1901861	regulation of muscle tissue development	1/39	46/18614	0.0920783	0.155793	0.0938091	BCL2	1
BP	GO:2001239	regulation of extrinsic apoptotic signaling pathway in absence of ligand	1/39	46/18614	0.0920783	0.155793	0.0938091	BCL2	1
BP	GO:0000209	protein polyubiquitination	2/39	244/18614	0.0924666	0.156171	0.0940368	BCL2/TRAF2	2
BP	GO:0009205	purine ribonucleoside triphosphate metabolic process	2/39	244/18614	0.0924666	0.156171	0.0940368	DNM1L/MTOR	2
BP	GO:0002703	regulation of leukocyte mediated immunity	2/39	246/18614	0.0937509	0.156918	0.0944865	TRAF2/IL1R1	2
BP	GO:0001774	microglial cell activation	1/39	47/18614	0.0939853	0.156918	0.0944865	ATM	1
BP	GO:0002701	negative regulation of production of molecular mediator of immune response	1/39	47/18614	0.0939853	0.156918	0.0944865	IRAK3	1
BP	GO:0006984	ER-nucleus signaling pathway	1/39	47/18614	0.0939853	0.156918	0.0944865	TP53	1
BP	GO:0031577	spindle checkpoint signaling	1/39	47/18614	0.0939853	0.156918	0.0944865	ATM	1
BP	GO:0035196	miRNA processing	1/39	47/18614	0.0939853	0.156918	0.0944865	TP53	1
BP	GO:0045601	regulation of endothelial cell differentiation	1/39	47/18614	0.0939853	0.156918	0.0944865	IKBKB	1
BP	GO:0046633	alpha-beta T cell proliferation	1/39	47/18614	0.0939853	0.156918	0.0944865	PRKCQ	1
BP	GO:0071985	multivesicular body sorting pathway	1/39	47/18614	0.0939853	0.156918	0.0944865	CHMP7	1
BP	GO:0090224	regulation of spindle organization	1/39	47/18614	0.0939853	0.156918	0.0944865	CHMP7	1
BP	GO:1901385	regulation of voltage-gated calcium channel activity	1/39	47/18614	0.0939853	0.156918	0.0944865	PPP3CC	1
BP	GO:1901976	regulation of cell cycle checkpoint	1/39	47/18614	0.0939853	0.156918	0.0944865	CHEK2	1
BP	GO:1901985	positive regulation of protein acetylation	1/39	47/18614	0.0939853	0.156918	0.0944865	MYBBP1A	1
BP	GO:0048863	stem cell differentiation	2/39	247/18614	0.0943951	0.157187	0.0946485	BCL2/TP53	2
BP	GO:0042593	glucose homeostasis	2/39	248/18614	0.0950405	0.157187	0.0946485	ENDOG/PIK3R1	2
BP	GO:0051259	protein complex oligomerization	2/39	248/18614	0.0950405	0.157187	0.0946485	TP53/DNM1L	2
BP	GO:0009144	purine nucleoside triphosphate metabolic process	2/39	249/18614	0.0956873	0.157187	0.0946485	DNM1L/MTOR	2
BP	GO:0033500	carbohydrate homeostasis	2/39	249/18614	0.0956873	0.157187	0.0946485	ENDOG/PIK3R1	2
BP	GO:0006110	regulation of glycolytic process	1/39	48/18614	0.0958883	0.157187	0.0946485	MTOR	1
BP	GO:0030865	cortical cytoskeleton organization	1/39	48/18614	0.0958883	0.157187	0.0946485	IKBKB	1
BP	GO:0031641	regulation of myelination	1/39	48/18614	0.0958883	0.157187	0.0946485	MTOR	1
BP	GO:0031648	protein destabilization	1/39	48/18614	0.0958883	0.157187	0.0946485	GSN	1
BP	GO:0032008	positive regulation of TOR signaling	1/39	48/18614	0.0958883	0.157187	0.0946485	AKT3	1
BP	GO:0032620	interleukin-17 production	1/39	48/18614	0.0958883	0.157187	0.0946485	PRKCQ	1
BP	GO:0032660	regulation of interleukin-17 production	1/39	48/18614	0.0958883	0.157187	0.0946485	PRKCQ	1
BP	GO:0033046	negative regulation of sister chromatid segregation	1/39	48/18614	0.0958883	0.157187	0.0946485	ATM	1
BP	GO:0033048	negative regulation of mitotic sister chromatid segregation	1/39	48/18614	0.0958883	0.157187	0.0946485	ATM	1
BP	GO:0035094	response to nicotine	1/39	48/18614	0.0958883	0.157187	0.0946485	BCL2	1
BP	GO:0035850	epithelial cell differentiation involved in kidney development	1/39	48/18614	0.0958883	0.157187	0.0946485	PRKX	1
BP	GO:0045841	negative regulation of mitotic metaphase/anaphase transition	1/39	48/18614	0.0958883	0.157187	0.0946485	ATM	1
BP	GO:0046189	phenol-containing compound biosynthetic process	1/39	48/18614	0.0958883	0.157187	0.0946485	APPL1	1
BP	GO:0046596	regulation of viral entry into host cell	1/39	48/18614	0.0958883	0.157187	0.0946485	GSN	1
BP	GO:0048066	developmental pigmentation	1/39	48/18614	0.0958883	0.157187	0.0946485	BCL2	1
BP	GO:2000816	negative regulation of mitotic sister chromatid separation	1/39	48/18614	0.0958883	0.157187	0.0946485	ATM	1
BP	GO:0016485	protein processing	2/39	250/18614	0.0963354	0.157784	0.0950076	PRKACB/GSN	2
BP	GO:0009199	ribonucleoside triphosphate metabolic process	2/39	251/18614	0.0969848	0.158518	0.0954497	DNM1L/MTOR	2
BP	GO:0045926	negative regulation of growth	2/39	252/18614	0.0976354	0.158518	0.0954497	BCL2/TP53	2
BP	GO:0006911	phagocytosis, engulfment	1/39	49/18614	0.0977875	0.158518	0.0954497	GSN	1
BP	GO:0007528	neuromuscular junction development	1/39	49/18614	0.0977875	0.158518	0.0954497	FNTA	1
BP	GO:0010665	regulation of cardiac muscle cell apoptotic process	1/39	49/18614	0.0977875	0.158518	0.0954497	TP53	1
BP	GO:0019884	antigen processing and presentation of exogenous antigen	1/39	49/18614	0.0977875	0.158518	0.0954497	IKBKB	1
BP	GO:0030838	positive regulation of actin filament polymerization	1/39	49/18614	0.0977875	0.158518	0.0954497	MTOR	1
BP	GO:0043330	response to exogenous dsRNA	1/39	49/18614	0.0977875	0.158518	0.0954497	IRAK3	1
BP	GO:0061028	establishment of endothelial barrier	1/39	49/18614	0.0977875	0.158518	0.0954497	IKBKB	1
BP	GO:0071470	cellular response to osmotic stress	1/39	49/18614	0.0977875	0.158518	0.0954497	MTOR	1
BP	GO:0071825	protein-lipid complex subunit organization	1/39	49/18614	0.0977875	0.158518	0.0954497	PRKACB	1
BP	GO:0140895	cell surface toll-like receptor signaling pathway	1/39	49/18614	0.0977875	0.158518	0.0954497	APPL1	1
BP	GO:0048762	mesenchymal cell differentiation	2/39	255/18614	0.099595	0.160084	0.0963927	BCL2/MTOR	2
BP	GO:0050730	regulation of peptidyl-tyrosine phosphorylation	2/39	255/18614	0.099595	0.160084	0.0963927	TP53/MTOR	2
BP	GO:0002269	leukocyte activation involved in inflammatory response	1/39	50/18614	0.0996828	0.160084	0.0963927	ATM	1
BP	GO:0046365	monosaccharide catabolic process	1/39	50/18614	0.0996828	0.160084	0.0963927	TP53	1
BP	GO:0048009	insulin-like growth factor receptor signaling pathway	1/39	50/18614	0.0996828	0.160084	0.0963927	PIK3R1	1
BP	GO:0048546	digestive tract morphogenesis	1/39	50/18614	0.0996828	0.160084	0.0963927	BCL2	1
BP	GO:0051985	negative regulation of chromosome segregation	1/39	50/18614	0.0996828	0.160084	0.0963927	ATM	1
BP	GO:1902100	negative regulation of metaphase/anaphase transition of cell cycle	1/39	50/18614	0.0996828	0.160084	0.0963927	ATM	1
BP	GO:1903432	regulation of TORC1 signaling	1/39	50/18614	0.0996828	0.160084	0.0963927	ATM	1
BP	GO:1903747	regulation of establishment of protein localization to mitochondrion	1/39	50/18614	0.0996828	0.160084	0.0963927	MAPK8	1
BP	GO:1905819	negative regulation of chromosome separation	1/39	50/18614	0.0996828	0.160084	0.0963927	ATM	1
BP	GO:0016072	rRNA metabolic process	2/39	257/18614	0.100908	0.161615	0.0973145	TP53/MTOR	2
BP	GO:0045927	positive regulation of growth	2/39	258/18614	0.101566	0.161615	0.0973145	BCL2/MTOR	2
BP	GO:0009299	mRNA transcription	1/39	51/18614	0.101574	0.161615	0.0973145	TP53	1
BP	GO:0010662	regulation of striated muscle cell apoptotic process	1/39	51/18614	0.101574	0.161615	0.0973145	TP53	1
BP	GO:0044818	mitotic G2/M transition checkpoint	1/39	51/18614	0.101574	0.161615	0.0973145	ATM	1
BP	GO:0045912	negative regulation of carbohydrate metabolic process	1/39	51/18614	0.101574	0.161615	0.0973145	TP53	1
BP	GO:0051489	regulation of filopodium assembly	1/39	51/18614	0.101574	0.161615	0.0973145	PIK3R1	1
BP	GO:0051646	mitochondrion localization	1/39	51/18614	0.101574	0.161615	0.0973145	DNM1L	1
BP	GO:0061082	myeloid leukocyte cytokine production	1/39	51/18614	0.101574	0.161615	0.0973145	IRAK3	1
BP	GO:1902895	positive regulation of miRNA transcription	1/39	51/18614	0.101574	0.161615	0.0973145	TP53	1
BP	GO:2001238	positive regulation of extrinsic apoptotic signaling pathway	1/39	51/18614	0.101574	0.161615	0.0973145	TRAF2	1
BP	GO:0002762	negative regulation of myeloid leukocyte differentiation	1/39	52/18614	0.103462	0.163656	0.0985437	PIK3R1	1
BP	GO:0010543	regulation of platelet activation	1/39	52/18614	0.103462	0.163656	0.0985437	PRKCQ	1
BP	GO:0031103	axon regeneration	1/39	52/18614	0.103462	0.163656	0.0985437	BCL2	1
BP	GO:0045332	phospholipid translocation	1/39	52/18614	0.103462	0.163656	0.0985437	FASLG	1
BP	GO:0051496	positive regulation of stress fiber assembly	1/39	52/18614	0.103462	0.163656	0.0985437	MTOR	1
BP	GO:0101023	vascular endothelial cell proliferation	1/39	52/18614	0.103462	0.163656	0.0985437	AKT3	1
BP	GO:1905562	regulation of vascular endothelial cell proliferation	1/39	52/18614	0.103462	0.163656	0.0985437	AKT3	1
BP	GO:0003007	heart morphogenesis	2/39	262/18614	0.104211	0.164704	0.0991744	TP53/MTOR	2
BP	GO:0001894	tissue homeostasis	2/39	263/18614	0.104875	0.165393	0.0995897	BCL2/AKT3	2
BP	GO:0060249	anatomical structure homeostasis	2/39	263/18614	0.104875	0.165393	0.0995897	BCL2/AKT3	2
BP	GO:0007140	male meiotic nuclear division	1/39	53/18614	0.105346	0.165393	0.0995897	ATM	1
BP	GO:0010659	cardiac muscle cell apoptotic process	1/39	53/18614	0.105346	0.165393	0.0995897	TP53	1
BP	GO:0010823	negative regulation of mitochondrion organization	1/39	53/18614	0.105346	0.165393	0.0995897	TP53	1
BP	GO:0033047	regulation of mitotic sister chromatid segregation	1/39	53/18614	0.105346	0.165393	0.0995897	ATM	1
BP	GO:0035065	regulation of histone acetylation	1/39	53/18614	0.105346	0.165393	0.0995897	MYBBP1A	1
BP	GO:0071622	regulation of granulocyte chemotaxis	1/39	53/18614	0.105346	0.165393	0.0995897	DNM1L	1
BP	GO:0071216	cellular response to biotic stimulus	2/39	264/18614	0.105541	0.165562	0.0996915	TP53/MAPK8	2
BP	GO:0051924	regulation of calcium ion transport	2/39	266/18614	0.106875	0.167236	0.100699	BCL2/PPP3CC	2
BP	GO:0014009	glial cell proliferation	1/39	54/18614	0.107225	0.167236	0.100699	TP53	1
BP	GO:0039531	regulation of viral-induced cytoplasmic pattern recognition receptor signaling pathway	1/39	54/18614	0.107225	0.167236	0.100699	BIRC3	1
BP	GO:0043550	regulation of lipid kinase activity	1/39	54/18614	0.107225	0.167236	0.100699	PIK3R1	1
BP	GO:0046686	response to cadmium ion	1/39	54/18614	0.107225	0.167236	0.100699	MAPK8	1
BP	GO:0071168	protein localization to chromatin	1/39	54/18614	0.107225	0.167236	0.100699	CHMP7	1
BP	GO:0098703	calcium ion import across plasma membrane	1/39	54/18614	0.107225	0.167236	0.100699	PPP3CC	1
BP	GO:0002699	positive regulation of immune effector process	2/39	267/18614	0.107544	0.167595	0.100916	TRAF2/IL1R1	2
BP	GO:0006402	mRNA catabolic process	2/39	268/18614	0.108214	0.168501	0.101461	ATM/TRAF2	2
BP	GO:0009141	nucleoside triphosphate metabolic process	2/39	269/18614	0.108885	0.168773	0.101625	DNM1L/MTOR	2
BP	GO:0090596	sensory organ morphogenesis	2/39	269/18614	0.108885	0.168773	0.101625	BCL2/FASLG	2
BP	GO:0010658	striated muscle cell apoptotic process	1/39	55/18614	0.109101	0.168773	0.101625	TP53	1
BP	GO:0010761	fibroblast migration	1/39	55/18614	0.109101	0.168773	0.101625	APPL1	1
BP	GO:0014888	striated muscle adaptation	1/39	55/18614	0.109101	0.168773	0.101625	GSN	1
BP	GO:0031529	ruffle organization	1/39	55/18614	0.109101	0.168773	0.101625	MTOR	1
BP	GO:0052372	modulation by symbiont of entry into host	1/39	55/18614	0.109101	0.168773	0.101625	GSN	1
BP	GO:0061900	glial cell activation	1/39	55/18614	0.109101	0.168773	0.101625	ATM	1
BP	GO:0002752	cell surface pattern recognition receptor signaling pathway	1/39	56/18614	0.110973	0.170971	0.102948	APPL1	1
BP	GO:0010559	regulation of glycoprotein biosynthetic process	1/39	56/18614	0.110973	0.170971	0.102948	BCL2	1
BP	GO:0043331	response to dsRNA	1/39	56/18614	0.110973	0.170971	0.102948	IRAK3	1
BP	GO:0045839	negative regulation of mitotic nuclear division	1/39	56/18614	0.110973	0.170971	0.102948	ATM	1
BP	GO:0140962	multicellular organismal-level chemical homeostasis	1/39	56/18614	0.110973	0.170971	0.102948	PRKACB	1
BP	GO:0007080	mitotic metaphase plate congression	1/39	57/18614	0.112842	0.172866	0.104089	CHMP7	1
BP	GO:0007131	reciprocal meiotic recombination	1/39	57/18614	0.112842	0.172866	0.104089	ATM	1
BP	GO:0034204	lipid translocation	1/39	57/18614	0.112842	0.172866	0.104089	FASLG	1
BP	GO:0045010	actin nucleation	1/39	57/18614	0.112842	0.172866	0.104089	GSN	1
BP	GO:0046148	pigment biosynthetic process	1/39	57/18614	0.112842	0.172866	0.104089	APPL1	1
BP	GO:0050881	musculoskeletal movement	1/39	57/18614	0.112842	0.172866	0.104089	MTOR	1
BP	GO:0140527	reciprocal homologous recombination	1/39	57/18614	0.112842	0.172866	0.104089	ATM	1
BP	GO:0006998	nuclear envelope organization	1/39	58/18614	0.114706	0.174453	0.105045	CHMP7	1
BP	GO:0010718	positive regulation of epithelial to mesenchymal transition	1/39	58/18614	0.114706	0.174453	0.105045	MTOR	1
BP	GO:0010965	regulation of mitotic sister chromatid separation	1/39	58/18614	0.114706	0.174453	0.105045	ATM	1
BP	GO:0042306	regulation of protein import into nucleus	1/39	58/18614	0.114706	0.174453	0.105045	PIK3R1	1
BP	GO:0050879	multicellular organismal movement	1/39	58/18614	0.114706	0.174453	0.105045	MTOR	1
BP	GO:0061005	cell differentiation involved in kidney development	1/39	58/18614	0.114706	0.174453	0.105045	PRKX	1
BP	GO:0090329	regulation of DNA-templated DNA replication	1/39	58/18614	0.114706	0.174453	0.105045	ENDOG	1
BP	GO:0097352	autophagosome maturation	1/39	58/18614	0.114706	0.174453	0.105045	CHMP7	1
BP	GO:0099024	plasma membrane invagination	1/39	58/18614	0.114706	0.174453	0.105045	GSN	1
BP	GO:0006260	DNA replication	2/39	278/18614	0.114978	0.174726	0.105209	TP53/ENDOG	2
BP	GO:0051348	negative regulation of transferase activity	2/39	279/18614	0.11566	0.175622	0.105749	TP53/IRAK3	2
BP	GO:0031102	neuron projection regeneration	1/39	59/18614	0.116567	0.176152	0.106068	BCL2	1
BP	GO:0033619	membrane protein proteolysis	1/39	59/18614	0.116567	0.176152	0.106068	PRKCQ	1
BP	GO:0051438	regulation of ubiquitin-protein transferase activity	1/39	59/18614	0.116567	0.176152	0.106068	DNM1L	1
BP	GO:0070534	protein K63-linked ubiquitination	1/39	59/18614	0.116567	0.176152	0.106068	TRAF2	1
BP	GO:2000351	regulation of endothelial cell apoptotic process	1/39	59/18614	0.116567	0.176152	0.106068	FASLG	1
BP	GO:2001258	negative regulation of cation channel activity	1/39	59/18614	0.116567	0.176152	0.106068	PPP3CC	1
BP	GO:0007548	sex differentiation	2/39	283/18614	0.118401	0.177542	0.106905	BCL2/ATM	2
BP	GO:0043542	endothelial cell migration	2/39	283/18614	0.118401	0.177542	0.106905	PRKX/AKT3	2
BP	GO:0001658	branching involved in ureteric bud morphogenesis	1/39	60/18614	0.118424	0.177542	0.106905	BCL2	1
BP	GO:0002011	morphogenesis of an epithelial sheet	1/39	60/18614	0.118424	0.177542	0.106905	MTOR	1
BP	GO:0003179	heart valve morphogenesis	1/39	60/18614	0.118424	0.177542	0.106905	MTOR	1
BP	GO:0043407	negative regulation of MAP kinase activity	1/39	60/18614	0.118424	0.177542	0.106905	IRAK3	1
BP	GO:0046824	positive regulation of nucleocytoplasmic transport	1/39	60/18614	0.118424	0.177542	0.106905	PIK3R1	1
BP	GO:0071709	membrane assembly	1/39	60/18614	0.118424	0.177542	0.106905	CHMP7	1
BP	GO:1903078	positive regulation of protein localization to plasma membrane	1/39	60/18614	0.118424	0.177542	0.106905	PIK3R1	1
BP	GO:2000630	positive regulation of miRNA metabolic process	1/39	60/18614	0.118424	0.177542	0.106905	TP53	1
BP	GO:0031279	regulation of cyclase activity	1/39	61/18614	0.120277	0.179751	0.108235	MAPK8	1
BP	GO:0035306	positive regulation of dephosphorylation	1/39	61/18614	0.120277	0.179751	0.108235	MTOR	1
BP	GO:0043903	regulation of biological process involved in symbiotic interaction	1/39	61/18614	0.120277	0.179751	0.108235	GSN	1
BP	GO:0051306	mitotic sister chromatid separation	1/39	61/18614	0.120277	0.179751	0.108235	ATM	1
BP	GO:0010721	negative regulation of cell development	2/39	286/18614	0.120467	0.179893	0.108321	TP53/PIK3R1	2
BP	GO:0032233	positive regulation of actin filament bundle assembly	1/39	62/18614	0.122126	0.181087	0.109039	MTOR	1
BP	GO:0043030	regulation of macrophage activation	1/39	62/18614	0.122126	0.181087	0.109039	ATM	1
BP	GO:0043506	regulation of JUN kinase activity	1/39	62/18614	0.122126	0.181087	0.109039	TRAF2	1
BP	GO:0060261	positive regulation of transcription initiation by RNA polymerase II	1/39	62/18614	0.122126	0.181087	0.109039	TP53	1
BP	GO:0090303	positive regulation of wound healing	1/39	62/18614	0.122126	0.181087	0.109039	MTOR	1
BP	GO:0097035	regulation of membrane lipid distribution	1/39	62/18614	0.122126	0.181087	0.109039	FASLG	1
BP	GO:1903018	regulation of glycoprotein metabolic process	1/39	62/18614	0.122126	0.181087	0.109039	BCL2	1
BP	GO:1904036	negative regulation of epithelial cell apoptotic process	1/39	62/18614	0.122126	0.181087	0.109039	BCL2	1
BP	GO:2000756	regulation of peptidyl-lysine acetylation	1/39	62/18614	0.122126	0.181087	0.109039	MYBBP1A	1
BP	GO:0022898	regulation of transmembrane transporter activity	2/39	289/18614	0.122542	0.181562	0.109325	BCL2/PPP3CC	2
BP	GO:0044262	cellular carbohydrate metabolic process	2/39	290/18614	0.123236	0.182447	0.109858	TP53/MTOR	2
BP	GO:0001885	endothelial cell development	1/39	63/18614	0.123972	0.183107	0.110256	IKBKB	1
BP	GO:0048255	mRNA stabilization	1/39	63/18614	0.123972	0.183107	0.110256	TRAF2	1
BP	GO:0051784	negative regulation of nuclear division	1/39	63/18614	0.123972	0.183107	0.110256	ATM	1
BP	GO:0019932	second-messenger-mediated signaling	2/39	292/18614	0.124627	0.183931	0.110752	PPP3CC/MTOR	2
BP	GO:0006303	double-strand break repair via nonhomologous end joining	1/39	64/18614	0.125813	0.18439	0.111028	ATM	1
BP	GO:0032615	interleukin-12 production	1/39	64/18614	0.125813	0.18439	0.111028	IRAK3	1
BP	GO:0032655	regulation of interleukin-12 production	1/39	64/18614	0.125813	0.18439	0.111028	IRAK3	1
BP	GO:0033059	cellular pigmentation	1/39	64/18614	0.125813	0.18439	0.111028	BCL2	1
BP	GO:0035825	homologous recombination	1/39	64/18614	0.125813	0.18439	0.111028	ATM	1
BP	GO:0040014	regulation of multicellular organism growth	1/39	64/18614	0.125813	0.18439	0.111028	BCL2	1
BP	GO:0044091	membrane biogenesis	1/39	64/18614	0.125813	0.18439	0.111028	CHMP7	1
BP	GO:0045143	homologous chromosome segregation	1/39	64/18614	0.125813	0.18439	0.111028	ATM	1
BP	GO:0071300	cellular response to retinoic acid	1/39	64/18614	0.125813	0.18439	0.111028	ATM	1
BP	GO:0010632	regulation of epithelial cell migration	2/39	295/18614	0.12672	0.185575	0.111742	AKT3/MTOR	2
BP	GO:0002366	leukocyte activation involved in immune response	2/39	296/18614	0.12742	0.186219	0.11213	TP53/MTOR	2
BP	GO:0010324	membrane invagination	1/39	65/18614	0.127651	0.186219	0.11213	GSN	1
BP	GO:0019226	transmission of nerve impulse	1/39	65/18614	0.127651	0.186219	0.11213	MTOR	1
BP	GO:0048857	neural nucleus development	1/39	65/18614	0.127651	0.186219	0.11213	BCL2	1
BP	GO:0072577	endothelial cell apoptotic process	1/39	65/18614	0.127651	0.186219	0.11213	FASLG	1
BP	GO:0051146	striated muscle cell differentiation	2/39	297/18614	0.12812	0.18676	0.112455	BCL2/MTOR	2
BP	GO:0010812	negative regulation of cell-substrate adhesion	1/39	66/18614	0.129485	0.188315	0.113392	PIK3R1	1
BP	GO:0060675	ureteric bud morphogenesis	1/39	66/18614	0.129485	0.188315	0.113392	BCL2	1
BP	GO:2001259	positive regulation of cation channel activity	1/39	66/18614	0.129485	0.188315	0.113392	PPP3CC	1
BP	GO:0002263	cell activation involved in immune response	2/39	300/18614	0.130228	0.189105	0.113867	TP53/MTOR	2
BP	GO:0002449	lymphocyte mediated immunity	2/39	300/18614	0.130228	0.189105	0.113867	TRAF2/IL1R1	2
BP	GO:0048608	reproductive structure development	2/39	301/18614	0.130932	0.189957	0.11438	BCL2/ATM	2
BP	GO:0038034	signal transduction in absence of ligand	1/39	67/18614	0.131316	0.189957	0.11438	BCL2	1
BP	GO:0051205	protein insertion into membrane	1/39	67/18614	0.131316	0.189957	0.11438	MAPK8	1
BP	GO:0072171	mesonephric tubule morphogenesis	1/39	67/18614	0.131316	0.189957	0.11438	BCL2	1
BP	GO:0097192	extrinsic apoptotic signaling pathway in absence of ligand	1/39	67/18614	0.131316	0.189957	0.11438	BCL2	1
BP	GO:0006874	intracellular calcium ion homeostasis	2/39	303/18614	0.132344	0.191152	0.1151	BCL2/FASLG	2
BP	GO:0051607	defense response to virus	2/39	303/18614	0.132344	0.191152	0.1151	BCL2/MAP3K14	2
BP	GO:0048872	homeostasis of number of cells	2/39	304/18614	0.133051	0.19143	0.115267	BCL2/AKT3	2
BP	GO:0140546	defense response to symbiont	2/39	304/18614	0.133051	0.19143	0.115267	BCL2/MAP3K14	2
BP	GO:0051123	RNA polymerase II preinitiation complex assembly	1/39	68/18614	0.133142	0.19143	0.115267	TP53	1
BP	GO:1902893	regulation of miRNA transcription	1/39	68/18614	0.133142	0.19143	0.115267	TP53	1
BP	GO:1904377	positive regulation of protein localization to cell periphery	1/39	68/18614	0.133142	0.19143	0.115267	PIK3R1	1
BP	GO:2000144	positive regulation of DNA-templated transcription initiation	1/39	68/18614	0.133142	0.19143	0.115267	TP53	1
BP	GO:0061458	reproductive system development	2/39	305/18614	0.133759	0.192171	0.115714	BCL2/ATM	2
BP	GO:0014015	positive regulation of gliogenesis	1/39	69/18614	0.134965	0.19288	0.116141	MTOR	1
BP	GO:0032835	glomerulus development	1/39	69/18614	0.134965	0.19288	0.116141	BCL2	1
BP	GO:0042093	T-helper cell differentiation	1/39	69/18614	0.134965	0.19288	0.116141	MTOR	1
BP	GO:0061077	chaperone-mediated protein folding	1/39	69/18614	0.134965	0.19288	0.116141	DFFA	1
BP	GO:0061614	miRNA transcription	1/39	69/18614	0.134965	0.19288	0.116141	TP53	1
BP	GO:0070830	bicellular tight junction assembly	1/39	69/18614	0.134965	0.19288	0.116141	IKBKB	1
BP	GO:0150116	regulation of cell-substrate junction organization	1/39	69/18614	0.134965	0.19288	0.116141	PIK3R1	1
BP	GO:0043112	receptor metabolic process	1/39	70/18614	0.136784	0.194746	0.117264	FNTA	1
BP	GO:0046847	filopodium assembly	1/39	70/18614	0.136784	0.194746	0.117264	PIK3R1	1
BP	GO:0048488	synaptic vesicle endocytosis	1/39	70/18614	0.136784	0.194746	0.117264	PPP3CC	1
BP	GO:0051881	regulation of mitochondrial membrane potential	1/39	70/18614	0.136784	0.194746	0.117264	BCL2	1
BP	GO:2000379	positive regulation of reactive oxygen species metabolic process	1/39	70/18614	0.136784	0.194746	0.117264	TP53	1
BP	GO:0001822	kidney development	2/39	310/18614	0.137313	0.195351	0.117628	BCL2/PRKX	2
BP	GO:0002294	CD4-positive, alpha-beta T cell differentiation involved in immune response	1/39	71/18614	0.1386	0.196298	0.118199	MTOR	1
BP	GO:0002562	somatic diversification of immune receptors via germline recombination within a single locus	1/39	71/18614	0.1386	0.196298	0.118199	ATM	1
BP	GO:0016444	somatic cell DNA recombination	1/39	71/18614	0.1386	0.196298	0.118199	ATM	1
BP	GO:0032922	circadian regulation of gene expression	1/39	71/18614	0.1386	0.196298	0.118199	MYBBP1A	1
BP	GO:0048002	antigen processing and presentation of peptide antigen	1/39	71/18614	0.1386	0.196298	0.118199	IKBKB	1
BP	GO:0070918	regulatory ncRNA processing	1/39	71/18614	0.1386	0.196298	0.118199	TP53	1
BP	GO:0060326	cell chemotaxis	2/39	312/18614	0.13874	0.19635	0.11823	PRKCQ/DNM1L	2
BP	GO:0044403	biological process involved in symbiotic interaction	2/39	313/18614	0.139455	0.19695	0.118591	CHMP7/GSN	2
BP	GO:0002260	lymphocyte homeostasis	1/39	72/18614	0.140412	0.19695	0.118591	BCL2	1
BP	GO:0002287	alpha-beta T cell activation involved in immune response	1/39	72/18614	0.140412	0.19695	0.118591	MTOR	1
BP	GO:0002293	alpha-beta T cell differentiation involved in immune response	1/39	72/18614	0.140412	0.19695	0.118591	MTOR	1
BP	GO:0032715	negative regulation of interleukin-6 production	1/39	72/18614	0.140412	0.19695	0.118591	IRAK3	1
BP	GO:0043489	RNA stabilization	1/39	72/18614	0.140412	0.19695	0.118591	TRAF2	1
BP	GO:0043954	cellular component maintenance	1/39	72/18614	0.140412	0.19695	0.118591	APPL1	1
BP	GO:0046635	positive regulation of alpha-beta T cell activation	1/39	72/18614	0.140412	0.19695	0.118591	PRKCQ	1
BP	GO:0051310	metaphase plate congression	1/39	72/18614	0.140412	0.19695	0.118591	CHMP7	1
BP	GO:0060260	regulation of transcription initiation by RNA polymerase II	1/39	72/18614	0.140412	0.19695	0.118591	TP53	1
BP	GO:0060411	cardiac septum morphogenesis	1/39	72/18614	0.140412	0.19695	0.118591	TP53	1
BP	GO:0140238	presynaptic endocytosis	1/39	72/18614	0.140412	0.19695	0.118591	PPP3CC	1
BP	GO:0003170	heart valve development	1/39	73/18614	0.14222	0.198312	0.119411	MTOR	1
BP	GO:0007405	neuroblast proliferation	1/39	73/18614	0.14222	0.198312	0.119411	TP53	1
BP	GO:0043462	regulation of ATP-dependent activity	1/39	73/18614	0.14222	0.198312	0.119411	TP53	1
BP	GO:0050795	regulation of behavior	1/39	73/18614	0.14222	0.198312	0.119411	MTOR	1
BP	GO:0070527	platelet aggregation	1/39	73/18614	0.14222	0.198312	0.119411	PRKCQ	1
BP	GO:1900076	regulation of cellular response to insulin stimulus	1/39	73/18614	0.14222	0.198312	0.119411	PRKCQ	1
BP	GO:1902373	negative regulation of mRNA catabolic process	1/39	73/18614	0.14222	0.198312	0.119411	TRAF2	1
BP	GO:1905818	regulation of chromosome separation	1/39	73/18614	0.14222	0.198312	0.119411	ATM	1
BP	GO:0006401	RNA catabolic process	2/39	319/18614	0.143762	0.200092	0.120483	ATM/TRAF2	2
BP	GO:1902105	regulation of leukocyte differentiation	2/39	319/18614	0.143762	0.200092	0.120483	PIK3R1/MTOR	2
BP	GO:0008333	endosome to lysosome transport	1/39	74/18614	0.144024	0.200092	0.120483	CHMP7	1
BP	GO:0031343	positive regulation of cell killing	1/39	74/18614	0.144024	0.200092	0.120483	MAPK8	1
BP	GO:0045123	cellular extravasation	1/39	74/18614	0.144024	0.200092	0.120483	IL1R1	1
BP	GO:0042063	gliogenesis	2/39	320/18614	0.144483	0.200289	0.120602	TP53/MTOR	2
BP	GO:0060485	mesenchyme development	2/39	320/18614	0.144483	0.200289	0.120602	BCL2/MTOR	2
BP	GO:0072001	renal system development	2/39	320/18614	0.144483	0.200289	0.120602	BCL2/PRKX	2
BP	GO:0030968	endoplasmic reticulum unfolded protein response	1/39	75/18614	0.145824	0.201119	0.121101	PIK3R1	1
BP	GO:0042058	regulation of epidermal growth factor receptor signaling pathway	1/39	75/18614	0.145824	0.201119	0.121101	FASLG	1
BP	GO:0043536	positive regulation of blood vessel endothelial cell migration	1/39	75/18614	0.145824	0.201119	0.121101	AKT3	1
BP	GO:0051899	membrane depolarization	1/39	75/18614	0.145824	0.201119	0.121101	BCL2	1
BP	GO:0070192	chromosome organization involved in meiotic cell cycle	1/39	75/18614	0.145824	0.201119	0.121101	ATM	1
BP	GO:0072078	nephron tubule morphogenesis	1/39	75/18614	0.145824	0.201119	0.121101	BCL2	1
BP	GO:0120192	tight junction assembly	1/39	75/18614	0.145824	0.201119	0.121101	IKBKB	1
BP	GO:0032409	regulation of transporter activity	2/39	324/18614	0.147374	0.202712	0.122061	BCL2/PPP3CC	2
BP	GO:0002637	regulation of immunoglobulin production	1/39	76/18614	0.147621	0.202712	0.122061	TRAF2	1
BP	GO:0006919	activation of cysteine-type endopeptidase activity involved in apoptotic process	1/39	76/18614	0.147621	0.202712	0.122061	FASLG	1
BP	GO:0086003	cardiac muscle cell contraction	1/39	76/18614	0.147621	0.202712	0.122061	GSN	1
BP	GO:0150076	neuroinflammatory response	1/39	76/18614	0.147621	0.202712	0.122061	ATM	1
BP	GO:1903036	positive regulation of response to wounding	1/39	76/18614	0.147621	0.202712	0.122061	MTOR	1
BP	GO:0032729	positive regulation of type II interferon production	1/39	77/18614	0.149415	0.204177	0.122943	IL1R1	1
BP	GO:0043297	apical junction assembly	1/39	77/18614	0.149415	0.204177	0.122943	IKBKB	1
BP	GO:0045685	regulation of glial cell differentiation	1/39	77/18614	0.149415	0.204177	0.122943	MTOR	1
BP	GO:0072088	nephron epithelium morphogenesis	1/39	77/18614	0.149415	0.204177	0.122943	BCL2	1
BP	GO:1901983	regulation of protein acetylation	1/39	77/18614	0.149415	0.204177	0.122943	MYBBP1A	1
BP	GO:2000514	regulation of CD4-positive, alpha-beta T cell activation	1/39	77/18614	0.149415	0.204177	0.122943	PRKCQ	1
BP	GO:0051251	positive regulation of lymphocyte activation	2/39	327/18614	0.149551	0.204177	0.122943	PRKCQ/BCL2	2
BP	GO:0055074	calcium ion homeostasis	2/39	327/18614	0.149551	0.204177	0.122943	BCL2/FASLG	2
BP	GO:0002200	somatic diversification of immune receptors	1/39	78/18614	0.151204	0.205546	0.123767	ATM	1
BP	GO:0002534	cytokine production involved in inflammatory response	1/39	78/18614	0.151204	0.205546	0.123767	APPL1	1
BP	GO:0032720	negative regulation of tumor necrosis factor production	1/39	78/18614	0.151204	0.205546	0.123767	IRAK3	1
BP	GO:0043154	negative regulation of cysteine-type endopeptidase activity involved in apoptotic process	1/39	78/18614	0.151204	0.205546	0.123767	BIRC3	1
BP	GO:0045824	negative regulation of innate immune response	1/39	78/18614	0.151204	0.205546	0.123767	IRAK3	1
BP	GO:1900015	regulation of cytokine production involved in inflammatory response	1/39	78/18614	0.151204	0.205546	0.123767	APPL1	1
BP	GO:0045861	negative regulation of proteolysis	2/39	330/18614	0.151734	0.206118	0.124112	TP53/BIRC3	2
BP	GO:0045913	positive regulation of carbohydrate metabolic process	1/39	79/18614	0.15299	0.207062	0.12468	MTOR	1
BP	GO:0051304	chromosome separation	1/39	79/18614	0.15299	0.207062	0.12468	ATM	1
BP	GO:0061333	renal tubule morphogenesis	1/39	79/18614	0.15299	0.207062	0.12468	BCL2	1
BP	GO:1903201	regulation of oxidative stress-induced cell death	1/39	79/18614	0.15299	0.207062	0.12468	ENDOG	1
BP	GO:0006310	DNA recombination	2/39	332/18614	0.153193	0.207062	0.12468	ATM/ENDOG	2
BP	GO:0032386	regulation of intracellular transport	2/39	332/18614	0.153193	0.207062	0.12468	MAPK8/PIK3R1	2
BP	GO:0051604	protein maturation	2/39	332/18614	0.153193	0.207062	0.12468	PRKACB/GSN	2
BP	GO:0002292	T cell differentiation involved in immune response	1/39	80/18614	0.154772	0.207862	0.125162	MTOR	1
BP	GO:0048844	artery morphogenesis	1/39	80/18614	0.154772	0.207862	0.125162	AKT3	1
BP	GO:0051865	protein autoubiquitination	1/39	80/18614	0.154772	0.207862	0.125162	TRAF2	1
BP	GO:0070972	protein localization to endoplasmic reticulum	1/39	80/18614	0.154772	0.207862	0.125162	ANKRD13C	1
BP	GO:0071230	cellular response to amino acid stimulus	1/39	80/18614	0.154772	0.207862	0.125162	MTOR	1
BP	GO:0072028	nephron morphogenesis	1/39	80/18614	0.154772	0.207862	0.125162	BCL2	1
BP	GO:0090049	regulation of cell migration involved in sprouting angiogenesis	1/39	80/18614	0.154772	0.207862	0.125162	AKT3	1
BP	GO:1903556	negative regulation of tumor necrosis factor superfamily cytokine production	1/39	80/18614	0.154772	0.207862	0.125162	IRAK3	1
BP	GO:2000142	regulation of DNA-templated transcription initiation	1/39	80/18614	0.154772	0.207862	0.125162	TP53	1
BP	GO:0036465	synaptic vesicle recycling	1/39	81/18614	0.156551	0.209805	0.126331	PPP3CC	1
BP	GO:0120193	tight junction organization	1/39	81/18614	0.156551	0.209805	0.126331	IKBKB	1
BP	GO:2000628	regulation of miRNA metabolic process	1/39	81/18614	0.156551	0.209805	0.126331	TP53	1
BP	GO:0006446	regulation of translational initiation	1/39	82/18614	0.158326	0.211585	0.127403	MTOR	1
BP	GO:0006900	vesicle budding from membrane	1/39	82/18614	0.158326	0.211585	0.127403	CHMP7	1
BP	GO:1901184	regulation of ERBB signaling pathway	1/39	82/18614	0.158326	0.211585	0.127403	FASLG	1
BP	GO:1905897	regulation of response to endoplasmic reticulum stress	1/39	82/18614	0.158326	0.211585	0.127403	PIK3R1	1
BP	GO:0050871	positive regulation of B cell activation	1/39	83/18614	0.160097	0.2135	0.128557	BCL2	1
BP	GO:0070897	transcription preinitiation complex assembly	1/39	83/18614	0.160097	0.2135	0.128557	TP53	1
BP	GO:0072527	pyrimidine-containing compound metabolic process	1/39	83/18614	0.160097	0.2135	0.128557	MTOR	1
BP	GO:0000281	mitotic cytokinesis	1/39	84/18614	0.161865	0.215706	0.129885	CHMP7	1
BP	GO:1904062	regulation of monoatomic cation transmembrane transport	2/39	346/18614	0.163485	0.21714	0.130748	BCL2/PPP3CC	2
BP	GO:0006096	glycolytic process	1/39	85/18614	0.163629	0.21714	0.130748	MTOR	1
BP	GO:0006289	nucleotide-excision repair	1/39	85/18614	0.163629	0.21714	0.130748	TP53	1
BP	GO:0010660	regulation of muscle cell apoptotic process	1/39	85/18614	0.163629	0.21714	0.130748	TP53	1
BP	GO:0055013	cardiac muscle cell development	1/39	85/18614	0.163629	0.21714	0.130748	MTOR	1
BP	GO:1902369	negative regulation of RNA catabolic process	1/39	85/18614	0.163629	0.21714	0.130748	TRAF2	1
BP	GO:0006757	ATP generation from ADP	1/39	86/18614	0.165389	0.21871	0.131694	MTOR	1
BP	GO:0034103	regulation of tissue remodeling	1/39	86/18614	0.165389	0.21871	0.131694	TP53	1
BP	GO:0045069	regulation of viral genome replication	1/39	86/18614	0.165389	0.21871	0.131694	BCL2	1
BP	GO:0048041	focal adhesion assembly	1/39	86/18614	0.165389	0.21871	0.131694	BCL2	1
BP	GO:1900182	positive regulation of protein localization to nucleus	1/39	86/18614	0.165389	0.21871	0.131694	PIK3R1	1
BP	GO:0006936	muscle contraction	2/39	349/18614	0.165707	0.218978	0.131855	MTOR/GSN	2
BP	GO:0001960	negative regulation of cytokine-mediated signaling pathway	1/39	87/18614	0.167146	0.219807	0.132354	IRAK3	1
BP	GO:0008589	regulation of smoothened signaling pathway	1/39	87/18614	0.167146	0.219807	0.132354	PRKACB	1
BP	GO:0032370	positive regulation of lipid transport	1/39	87/18614	0.167146	0.219807	0.132354	FASLG	1
BP	GO:0046889	positive regulation of lipid biosynthetic process	1/39	87/18614	0.167146	0.219807	0.132354	MTOR	1
BP	GO:0048145	regulation of fibroblast proliferation	1/39	87/18614	0.167146	0.219807	0.132354	TP53	1
BP	GO:0048678	response to axon injury	1/39	87/18614	0.167146	0.219807	0.132354	BCL2	1
BP	GO:0097006	regulation of plasma lipoprotein particle levels	1/39	87/18614	0.167146	0.219807	0.132354	PRKACB	1
BP	GO:0031346	positive regulation of cell projection organization	2/39	353/18614	0.168679	0.221191	0.133188	PIK3R1/MTOR	2
BP	GO:0032273	positive regulation of protein polymerization	1/39	88/18614	0.168899	0.221191	0.133188	MTOR	1
BP	GO:0032413	negative regulation of ion transmembrane transporter activity	1/39	88/18614	0.168899	0.221191	0.133188	PPP3CC	1
BP	GO:0048864	stem cell development	1/39	88/18614	0.168899	0.221191	0.133188	BCL2	1
BP	GO:0050672	negative regulation of lymphocyte proliferation	1/39	88/18614	0.168899	0.221191	0.133188	ATM	1
BP	GO:0071277	cellular response to calcium ion	1/39	88/18614	0.168899	0.221191	0.133188	ENDOG	1
BP	GO:0006112	energy reserve metabolic process	1/39	89/18614	0.170649	0.222713	0.134104	MTOR	1
BP	GO:0032945	negative regulation of mononuclear cell proliferation	1/39	89/18614	0.170649	0.222713	0.134104	ATM	1
BP	GO:0043367	CD4-positive, alpha-beta T cell differentiation	1/39	89/18614	0.170649	0.222713	0.134104	MTOR	1
BP	GO:0071229	cellular response to acid chemical	1/39	89/18614	0.170649	0.222713	0.134104	MTOR	1
BP	GO:2000177	regulation of neural precursor cell proliferation	1/39	89/18614	0.170649	0.222713	0.134104	TP53	1
BP	GO:0010657	muscle cell apoptotic process	1/39	90/18614	0.172395	0.224373	0.135104	TP53	1
BP	GO:0014910	regulation of smooth muscle cell migration	1/39	90/18614	0.172395	0.224373	0.135104	BCL2	1
BP	GO:0048525	negative regulation of viral process	1/39	90/18614	0.172395	0.224373	0.135104	GSN	1
BP	GO:0051262	protein tetramerization	1/39	90/18614	0.172395	0.224373	0.135104	TP53	1
BP	GO:0001843	neural tube closure	1/39	91/18614	0.174137	0.225866	0.136002	PRKACB	1
BP	GO:0001942	hair follicle development	1/39	91/18614	0.174137	0.225866	0.136002	BCL2	1
BP	GO:0030071	regulation of mitotic metaphase/anaphase transition	1/39	91/18614	0.174137	0.225866	0.136002	ATM	1
BP	GO:0072091	regulation of stem cell proliferation	1/39	91/18614	0.174137	0.225866	0.136002	TP53	1
BP	GO:2000117	negative regulation of cysteine-type endopeptidase activity	1/39	91/18614	0.174137	0.225866	0.136002	BIRC3	1
BP	GO:0042176	regulation of protein catabolic process	2/39	361/18614	0.174651	0.226223	0.136218	CHEK2/IRAK3	2
BP	GO:0050878	regulation of body fluid levels	2/39	361/18614	0.174651	0.226223	0.136218	PRKCQ/PRKACB	2
BP	GO:0001656	metanephros development	1/39	92/18614	0.175876	0.227188	0.136799	BCL2	1
BP	GO:0055006	cardiac cell development	1/39	92/18614	0.175876	0.227188	0.136799	MTOR	1
BP	GO:0060606	tube closure	1/39	92/18614	0.175876	0.227188	0.136799	PRKACB	1
BP	GO:0060761	negative regulation of response to cytokine stimulus	1/39	92/18614	0.175876	0.227188	0.136799	IRAK3	1
BP	GO:0070301	cellular response to hydrogen peroxide	1/39	93/18614	0.177611	0.228857	0.137804	ENDOG	1
BP	GO:1904427	positive regulation of calcium ion transmembrane transport	1/39	93/18614	0.177611	0.228857	0.137804	PPP3CC	1
BP	GO:2001251	negative regulation of chromosome organization	1/39	93/18614	0.177611	0.228857	0.137804	ATM	1
BP	GO:0045862	positive regulation of proteolysis	2/39	365/18614	0.177651	0.228857	0.137804	FASLG/GSN	2
BP	GO:0016575	histone deacetylation	1/39	94/18614	0.179343	0.230098	0.138551	TP53	1
BP	GO:0022404	molting cycle process	1/39	94/18614	0.179343	0.230098	0.138551	BCL2	1
BP	GO:0022405	hair cycle process	1/39	94/18614	0.179343	0.230098	0.138551	BCL2	1
BP	GO:0046031	ADP metabolic process	1/39	94/18614	0.179343	0.230098	0.138551	MTOR	1
BP	GO:1900407	regulation of cellular response to oxidative stress	1/39	94/18614	0.179343	0.230098	0.138551	ENDOG	1
BP	GO:1902099	regulation of metaphase/anaphase transition of cell cycle	1/39	94/18614	0.179343	0.230098	0.138551	ATM	1
BP	GO:0071900	regulation of protein serine/threonine kinase activity	2/39	369/18614	0.180659	0.231375	0.13932	TRAF2/IRAK3	2
BP	GO:0002753	cytosolic pattern recognition receptor signaling pathway	1/39	95/18614	0.181071	0.231375	0.13932	BIRC3	1
BP	GO:0007091	metaphase/anaphase transition of mitotic cell cycle	1/39	95/18614	0.181071	0.231375	0.13932	ATM	1
BP	GO:0009953	dorsal/ventral pattern formation	1/39	95/18614	0.181071	0.231375	0.13932	PRKACB	1
BP	GO:0045638	negative regulation of myeloid cell differentiation	1/39	95/18614	0.181071	0.231375	0.13932	PIK3R1	1
BP	GO:0046330	positive regulation of JNK cascade	1/39	95/18614	0.181071	0.231375	0.13932	TRAF2	1
BP	GO:0002042	cell migration involved in sprouting angiogenesis	1/39	96/18614	0.182796	0.23217	0.139799	AKT3	1
BP	GO:0002690	positive regulation of leukocyte chemotaxis	1/39	96/18614	0.182796	0.23217	0.139799	DNM1L	1
BP	GO:0007044	cell-substrate junction assembly	1/39	96/18614	0.182796	0.23217	0.139799	BCL2	1
BP	GO:0031507	heterochromatin formation	1/39	96/18614	0.182796	0.23217	0.139799	ZNF304	1
BP	GO:0032088	negative regulation of NF-kappaB transcription factor activity	1/39	96/18614	0.182796	0.23217	0.139799	IRAK3	1
BP	GO:0032091	negative regulation of protein binding	1/39	96/18614	0.182796	0.23217	0.139799	MAPK8	1
BP	GO:0070664	negative regulation of leukocyte proliferation	1/39	96/18614	0.182796	0.23217	0.139799	ATM	1
BP	GO:0072080	nephron tubule development	1/39	96/18614	0.182796	0.23217	0.139799	BCL2	1
BP	GO:1903312	negative regulation of mRNA metabolic process	1/39	96/18614	0.182796	0.23217	0.139799	TRAF2	1
BP	GO:0001657	ureteric bud development	1/39	97/18614	0.184517	0.233573	0.140643	BCL2	1
BP	GO:0010586	miRNA metabolic process	1/39	97/18614	0.184517	0.233573	0.140643	TP53	1
BP	GO:0014020	primary neural tube formation	1/39	97/18614	0.184517	0.233573	0.140643	PRKACB	1
BP	GO:0014909	smooth muscle cell migration	1/39	97/18614	0.184517	0.233573	0.140643	BCL2	1
BP	GO:0034109	homotypic cell-cell adhesion	1/39	97/18614	0.184517	0.233573	0.140643	PRKCQ	1
BP	GO:0034620	cellular response to unfolded protein	1/39	98/18614	0.186234	0.235119	0.141574	PIK3R1	1
BP	GO:0044784	metaphase/anaphase transition of cell cycle	1/39	98/18614	0.186234	0.235119	0.141574	ATM	1
BP	GO:0072163	mesonephric epithelium development	1/39	98/18614	0.186234	0.235119	0.141574	BCL2	1
BP	GO:0072164	mesonephric tubule development	1/39	98/18614	0.186234	0.235119	0.141574	BCL2	1
BP	GO:0002696	positive regulation of leukocyte activation	2/39	377/18614	0.1867	0.23555	0.141834	PRKCQ/BCL2	2
BP	GO:2001237	negative regulation of extrinsic apoptotic signaling pathway	1/39	99/18614	0.187948	0.23681	0.142592	BCL2	1
BP	GO:2001243	negative regulation of intrinsic apoptotic signaling pathway	1/39	99/18614	0.187948	0.23681	0.142592	BCL2	1
BP	GO:0030512	negative regulation of transforming growth factor beta receptor signaling pathway	1/39	100/18614	0.189659	0.238107	0.143374	TP53	1
BP	GO:0034446	substrate adhesion-dependent cell spreading	1/39	100/18614	0.189659	0.238107	0.143374	PIK3R1	1
BP	GO:0061326	renal tubule development	1/39	100/18614	0.189659	0.238107	0.143374	BCL2	1
BP	GO:0140888	interferon-mediated signaling pathway	1/39	100/18614	0.189659	0.238107	0.143374	TP53	1
BP	GO:1901019	regulation of calcium ion transmembrane transporter activity	1/39	100/18614	0.189659	0.238107	0.143374	PPP3CC	1
BP	GO:0050767	regulation of neurogenesis	2/39	381/18614	0.189732	0.238107	0.143374	TP53/MTOR	2
BP	GO:0048709	oligodendrocyte differentiation	1/39	101/18614	0.191366	0.23984	0.144417	MTOR	1
BP	GO:0050764	regulation of phagocytosis	1/39	101/18614	0.191366	0.23984	0.144417	APPL1	1
BP	GO:0001654	eye development	2/39	385/18614	0.192771	0.241337	0.145318	BCL2/FASLG	2
BP	GO:0001823	mesonephros development	1/39	102/18614	0.193069	0.241337	0.145318	BCL2	1
BP	GO:0002532	production of molecular mediator involved in inflammatory response	1/39	102/18614	0.193069	0.241337	0.145318	APPL1	1
BP	GO:0006165	nucleoside diphosphate phosphorylation	1/39	102/18614	0.193069	0.241337	0.145318	MTOR	1
BP	GO:0001776	leukocyte homeostasis	1/39	103/18614	0.194769	0.242821	0.146212	BCL2	1
BP	GO:0010906	regulation of glucose metabolic process	1/39	103/18614	0.194769	0.242821	0.146212	TP53	1
BP	GO:0048144	fibroblast proliferation	1/39	103/18614	0.194769	0.242821	0.146212	TP53	1
BP	GO:1902882	regulation of response to oxidative stress	1/39	103/18614	0.194769	0.242821	0.146212	ENDOG	1
BP	GO:0150063	visual system development	2/39	389/18614	0.195817	0.243967	0.146902	BCL2/FASLG	2
BP	GO:0015914	phospholipid transport	1/39	104/18614	0.196466	0.244133	0.147002	FASLG	1
BP	GO:0033045	regulation of sister chromatid segregation	1/39	104/18614	0.196466	0.244133	0.147002	ATM	1
BP	GO:0046939	nucleotide phosphorylation	1/39	104/18614	0.196466	0.244133	0.147002	MTOR	1
BP	GO:0070252	actin-mediated cell contraction	1/39	104/18614	0.196466	0.244133	0.147002	GSN	1
BP	GO:0001841	neural tube formation	1/39	105/18614	0.198159	0.245432	0.147784	PRKACB	1
BP	GO:0021549	cerebellum development	1/39	105/18614	0.198159	0.245432	0.147784	TP53	1
BP	GO:0032760	positive regulation of tumor necrosis factor production	1/39	105/18614	0.198159	0.245432	0.147784	PIK3R1	1
BP	GO:0042102	positive regulation of T cell proliferation	1/39	105/18614	0.198159	0.245432	0.147784	PRKCQ	1
BP	GO:0070828	heterochromatin organization	1/39	105/18614	0.198159	0.245432	0.147784	ZNF304	1
BP	GO:0050867	positive regulation of cell activation	2/39	394/18614	0.199634	0.24704	0.148752	PRKCQ/BCL2	2
BP	GO:0009135	purine nucleoside diphosphate metabolic process	1/39	106/18614	0.199848	0.24704	0.148752	MTOR	1
BP	GO:0009179	purine ribonucleoside diphosphate metabolic process	1/39	106/18614	0.199848	0.24704	0.148752	MTOR	1
BP	GO:0048880	sensory system development	2/39	395/18614	0.200399	0.247559	0.149065	BCL2/FASLG	2
BP	GO:0003279	cardiac septum development	1/39	107/18614	0.201534	0.248153	0.149423	TP53	1
BP	GO:0030593	neutrophil chemotaxis	1/39	107/18614	0.201534	0.248153	0.149423	DNM1L	1
BP	GO:0032526	response to retinoic acid	1/39	107/18614	0.201534	0.248153	0.149423	ATM	1
BP	GO:0046822	regulation of nucleocytoplasmic transport	1/39	107/18614	0.201534	0.248153	0.149423	PIK3R1	1
BP	GO:0062014	negative regulation of small molecule metabolic process	1/39	107/18614	0.201534	0.248153	0.149423	TP53	1
BP	GO:0001701	in utero embryonic development	2/39	398/18614	0.202695	0.24942	0.150185	TP53/ENDOG	2
BP	GO:0033138	positive regulation of peptidyl-serine phosphorylation	1/39	108/18614	0.203217	0.2499	0.150475	BCL2	1
BP	GO:0042116	macrophage activation	1/39	109/18614	0.204896	0.250946	0.151104	ATM	1
BP	GO:0045132	meiotic chromosome segregation	1/39	109/18614	0.204896	0.250946	0.151104	ATM	1
BP	GO:0045814	negative regulation of gene expression, epigenetic	1/39	109/18614	0.204896	0.250946	0.151104	ZNF304	1
BP	GO:0060840	artery development	1/39	109/18614	0.204896	0.250946	0.151104	AKT3	1
BP	GO:1902106	negative regulation of leukocyte differentiation	1/39	109/18614	0.204896	0.250946	0.151104	PIK3R1	1
BP	GO:1903557	positive regulation of tumor necrosis factor superfamily cytokine production	1/39	109/18614	0.204896	0.250946	0.151104	PIK3R1	1
BP	GO:0002443	leukocyte mediated immunity	2/39	401/18614	0.204994	0.250946	0.151104	TRAF2/IL1R1	2
BP	GO:0010717	regulation of epithelial to mesenchymal transition	1/39	110/18614	0.206572	0.252388	0.151973	MTOR	1
BP	GO:0014812	muscle cell migration	1/39	110/18614	0.206572	0.252388	0.151973	BCL2	1
BP	GO:0031341	regulation of cell killing	1/39	110/18614	0.206572	0.252388	0.151973	MAPK8	1
BP	GO:0006367	transcription initiation at RNA polymerase II promoter	1/39	111/18614	0.208244	0.254267	0.153104	TP53	1
BP	GO:0006090	pyruvate metabolic process	1/39	112/18614	0.209913	0.255482	0.153835	MTOR	1
BP	GO:0007229	integrin-mediated signaling pathway	1/39	112/18614	0.209913	0.255482	0.153835	ZNF304	1
BP	GO:0042177	negative regulation of protein catabolic process	1/39	112/18614	0.209913	0.255482	0.153835	IRAK3	1
BP	GO:0043473	pigmentation	1/39	112/18614	0.209913	0.255482	0.153835	BCL2	1
BP	GO:1905954	positive regulation of lipid localization	1/39	112/18614	0.209913	0.255482	0.153835	FASLG	1
BP	GO:0032414	positive regulation of ion transmembrane transporter activity	1/39	113/18614	0.211578	0.257178	0.154857	PPP3CC	1
BP	GO:0061640	cytoskeleton-dependent cytokinesis	1/39	113/18614	0.211578	0.257178	0.154857	CHMP7	1
BP	GO:0042692	muscle cell differentiation	2/39	410/18614	0.211911	0.257417	0.155001	BCL2/MTOR	2
BP	GO:0007173	epidermal growth factor receptor signaling pathway	1/39	114/18614	0.21324	0.258205	0.155475	FASLG	1
BP	GO:0019882	antigen processing and presentation	1/39	114/18614	0.21324	0.258205	0.155475	IKBKB	1
BP	GO:0031532	actin cytoskeleton reorganization	1/39	114/18614	0.21324	0.258205	0.155475	GSN	1
BP	GO:0032410	negative regulation of transporter activity	1/39	114/18614	0.21324	0.258205	0.155475	PPP3CC	1
BP	GO:0046634	regulation of alpha-beta T cell activation	1/39	114/18614	0.21324	0.258205	0.155475	PRKCQ	1
BP	GO:0001938	positive regulation of endothelial cell proliferation	1/39	115/18614	0.214899	0.25955	0.156285	AKT3	1
BP	GO:0042303	molting cycle	1/39	115/18614	0.214899	0.25955	0.156285	BCL2	1
BP	GO:0042633	hair cycle	1/39	115/18614	0.214899	0.25955	0.156285	BCL2	1
BP	GO:1903707	negative regulation of hemopoiesis	1/39	115/18614	0.214899	0.25955	0.156285	PIK3R1	1
BP	GO:1903706	regulation of hemopoiesis	2/39	415/18614	0.215765	0.260429	0.156815	PIK3R1/MTOR	2
BP	GO:0009185	ribonucleoside diphosphate metabolic process	1/39	116/18614	0.216554	0.260884	0.157088	MTOR	1
BP	GO:0034502	protein localization to chromosome	1/39	116/18614	0.216554	0.260884	0.157088	CHMP7	1
BP	GO:0072009	nephron epithelium development	1/39	116/18614	0.216554	0.260884	0.157088	BCL2	1
BP	GO:0007088	regulation of mitotic nuclear division	1/39	117/18614	0.218206	0.26254	0.158085	ATM	1
BP	GO:0043406	positive regulation of MAP kinase activity	1/39	117/18614	0.218206	0.26254	0.158085	TRAF2	1
BP	GO:0050678	regulation of epithelial cell proliferation	2/39	419/18614	0.218853	0.263151	0.158454	AKT3/ZNF304	2
BP	GO:0032609	type II interferon production	1/39	118/18614	0.219854	0.263853	0.158876	IL1R1	1
BP	GO:0032649	regulation of type II interferon production	1/39	118/18614	0.219854	0.263853	0.158876	IL1R1	1
BP	GO:0035967	cellular response to topologically incorrect protein	1/39	118/18614	0.219854	0.263853	0.158876	PIK3R1	1
BP	GO:0030278	regulation of ossification	1/39	119/18614	0.221499	0.265491	0.159862	BCL2	1
BP	GO:0045446	endothelial cell differentiation	1/39	119/18614	0.221499	0.265491	0.159862	IKBKB	1
BP	GO:0010959	regulation of metal ion transport	2/39	423/18614	0.221946	0.265858	0.160083	BCL2/PPP3CC	2
BP	GO:0006906	vesicle fusion	1/39	120/18614	0.223141	0.266784	0.160641	CHMP7	1
BP	GO:0032355	response to estradiol	1/39	120/18614	0.223141	0.266784	0.160641	ENDOG	1
BP	GO:0051101	regulation of DNA binding	1/39	120/18614	0.223141	0.266784	0.160641	MAPK8	1
BP	GO:0060537	muscle tissue development	2/39	426/18614	0.224268	0.267729	0.16121	BCL2/MTOR	2
BP	GO:0031398	positive regulation of protein ubiquitination	1/39	121/18614	0.224779	0.267729	0.16121	BIRC3	1
BP	GO:0043500	muscle adaptation	1/39	121/18614	0.224779	0.267729	0.16121	GSN	1
BP	GO:0072089	stem cell proliferation	1/39	121/18614	0.224779	0.267729	0.16121	TP53	1
BP	GO:0098773	skin epidermis development	1/39	121/18614	0.224779	0.267729	0.16121	BCL2	1
BP	GO:1901989	positive regulation of cell cycle phase transition	1/39	121/18614	0.224779	0.267729	0.16121	CHEK2	1
BP	GO:0007409	axonogenesis	2/39	427/18614	0.225042	0.267874	0.161297	PRKCQ/BCL2	2
BP	GO:0090174	organelle membrane fusion	1/39	122/18614	0.226414	0.269337	0.162178	CHMP7	1
BP	GO:0001503	ossification	2/39	429/18614	0.226592	0.26938	0.162204	BCL2/MYBBP1A	2
BP	GO:0006413	translational initiation	1/39	123/18614	0.228045	0.270429	0.162836	MTOR	1
BP	GO:0022612	gland morphogenesis	1/39	123/18614	0.228045	0.270429	0.162836	BCL2	1
BP	GO:0071901	negative regulation of protein serine/threonine kinase activity	1/39	123/18614	0.228045	0.270429	0.162836	IRAK3	1
BP	GO:0072655	establishment of protein localization to mitochondrion	1/39	123/18614	0.228045	0.270429	0.162836	MAPK8	1
BP	GO:0010720	positive regulation of cell development	2/39	432/18614	0.228919	0.271295	0.163357	BCL2/MTOR	2
BP	GO:0022904	respiratory electron transport chain	1/39	124/18614	0.229674	0.271705	0.163604	MYBBP1A	1
BP	GO:0032411	positive regulation of transporter activity	1/39	124/18614	0.229674	0.271705	0.163604	PPP3CC	1
BP	GO:0042391	regulation of membrane potential	2/39	433/18614	0.229695	0.271705	0.163604	BCL2/MTOR	2
BP	GO:0002832	negative regulation of response to biotic stimulus	1/39	125/18614	0.231298	0.273431	0.164644	IRAK3	1
BP	GO:0000956	nuclear-transcribed mRNA catabolic process	1/39	126/18614	0.23292	0.274663	0.165385	ATM	1
BP	GO:0001838	embryonic epithelial tube formation	1/39	126/18614	0.23292	0.274663	0.165385	PRKACB	1
BP	GO:0002688	regulation of leukocyte chemotaxis	1/39	126/18614	0.23292	0.274663	0.165385	DNM1L	1
BP	GO:0003206	cardiac chamber morphogenesis	1/39	126/18614	0.23292	0.274663	0.165385	TP53	1
BP	GO:0055007	cardiac muscle cell differentiation	1/39	127/18614	0.234538	0.276399	0.166431	MTOR	1
BP	GO:0048732	gland development	2/39	441/18614	0.235909	0.277842	0.1673	BCL2/ATM	2
BP	GO:0007127	meiosis I	1/39	129/18614	0.237764	0.279333	0.168197	ATM	1
BP	GO:0019079	viral genome replication	1/39	129/18614	0.237764	0.279333	0.168197	BCL2	1
BP	GO:0032874	positive regulation of stress-activated MAPK cascade	1/39	129/18614	0.237764	0.279333	0.168197	TRAF2	1
BP	GO:0051928	positive regulation of calcium ion transport	1/39	129/18614	0.237764	0.279333	0.168197	PPP3CC	1
BP	GO:0034329	cell junction assembly	2/39	444/18614	0.238243	0.279721	0.168431	BCL2/IKBKB	2
BP	GO:0009150	purine ribonucleotide metabolic process	2/39	445/18614	0.239021	0.280461	0.168877	DNM1L/MTOR	2
BP	GO:0051209	release of sequestered calcium ion into cytosol	1/39	130/18614	0.239373	0.2807	0.16902	FASLG	1
BP	GO:0010595	positive regulation of endothelial cell migration	1/39	131/18614	0.240977	0.281363	0.16942	AKT3	1
BP	GO:0030048	actin filament-based movement	1/39	131/18614	0.240977	0.281363	0.16942	GSN	1
BP	GO:0038127	ERBB signaling pathway	1/39	131/18614	0.240977	0.281363	0.16942	FASLG	1
BP	GO:0051283	negative regulation of sequestering of calcium ion	1/39	131/18614	0.240977	0.281363	0.16942	FASLG	1
BP	GO:0051983	regulation of chromosome segregation	1/39	131/18614	0.240977	0.281363	0.16942	ATM	1
BP	GO:0070304	positive regulation of stress-activated protein kinase signaling cascade	1/39	131/18614	0.240977	0.281363	0.16942	TRAF2	1
BP	GO:0071621	granulocyte chemotaxis	1/39	131/18614	0.240977	0.281363	0.16942	DNM1L	1
BP	GO:0007041	lysosomal transport	1/39	132/18614	0.242579	0.283059	0.170441	CHMP7	1
BP	GO:0030168	platelet activation	1/39	133/18614	0.244177	0.284573	0.171352	PRKCQ	1
BP	GO:0051282	regulation of sequestering of calcium ion	1/39	133/18614	0.244177	0.284573	0.171352	FASLG	1
BP	GO:0003012	muscle system process	2/39	452/18614	0.244473	0.284743	0.171455	MTOR/GSN	2
BP	GO:0009132	nucleoside diphosphate metabolic process	1/39	134/18614	0.245772	0.285554	0.171943	MTOR	1
BP	GO:0048565	digestive tract development	1/39	134/18614	0.245772	0.285554	0.171943	BCL2	1
BP	GO:0061982	meiosis I cell cycle process	1/39	134/18614	0.245772	0.285554	0.171943	ATM	1
BP	GO:1900180	regulation of protein localization to nucleus	1/39	134/18614	0.245772	0.285554	0.171943	PIK3R1	1
BP	GO:0071333	cellular response to glucose stimulus	1/39	136/18614	0.248952	0.288718	0.173848	ENDOG	1
BP	GO:0098659	inorganic cation import across plasma membrane	1/39	136/18614	0.248952	0.288718	0.173848	PPP3CC	1
BP	GO:0099587	inorganic ion import across plasma membrane	1/39	136/18614	0.248952	0.288718	0.173848	PPP3CC	1
BP	GO:0003158	endothelium development	1/39	137/18614	0.250538	0.289847	0.174528	IKBKB	1
BP	GO:0007498	mesoderm development	1/39	137/18614	0.250538	0.289847	0.174528	BMX	1
BP	GO:0051208	sequestering of calcium ion	1/39	137/18614	0.250538	0.289847	0.174528	FASLG	1
BP	GO:0061041	regulation of wound healing	1/39	137/18614	0.250538	0.289847	0.174528	MTOR	1
BP	GO:0051960	regulation of nervous system development	2/39	461/18614	0.251492	0.290774	0.175086	TP53/MTOR	2
BP	GO:0071331	cellular response to hexose stimulus	1/39	138/18614	0.25212	0.291143	0.175309	ENDOG	1
BP	GO:0072175	epithelial tube formation	1/39	138/18614	0.25212	0.291143	0.175309	PRKACB	1
BP	GO:0042157	lipoprotein metabolic process	1/39	139/18614	0.253698	0.292411	0.176072	ATM	1
BP	GO:0046328	regulation of JNK cascade	1/39	139/18614	0.253698	0.292411	0.176072	TRAF2	1
BP	GO:1903322	positive regulation of protein modification by small protein conjugation or removal	1/39	139/18614	0.253698	0.292411	0.176072	BIRC3	1
BP	GO:0009259	ribonucleotide metabolic process	2/39	464/18614	0.253834	0.292411	0.176072	DNM1L/MTOR	2
BP	GO:0050852	T cell receptor signaling pathway	1/39	140/18614	0.255274	0.293674	0.176832	IKBKB	1
BP	GO:0071326	cellular response to monosaccharide stimulus	1/39	140/18614	0.255274	0.293674	0.176832	ENDOG	1
BP	GO:0050808	synapse organization	2/39	466/18614	0.255396	0.293674	0.176832	APPL1/FNTA	2
BP	GO:0045727	positive regulation of translation	1/39	141/18614	0.256846	0.295162	0.177729	MTOR	1
BP	GO:0001508	action potential	1/39	142/18614	0.258415	0.296426	0.17849	MTOR	1
BP	GO:0006986	response to unfolded protein	1/39	142/18614	0.258415	0.296426	0.17849	PIK3R1	1
BP	GO:0051384	response to glucocorticoid	1/39	142/18614	0.258415	0.296426	0.17849	BCL2	1
BP	GO:0006997	nucleus organization	1/39	143/18614	0.25998	0.297681	0.179246	CHMP7	1
BP	GO:0033135	regulation of peptidyl-serine phosphorylation	1/39	143/18614	0.25998	0.297681	0.179246	BCL2	1
BP	GO:0050921	positive regulation of chemotaxis	1/39	143/18614	0.25998	0.297681	0.179246	DNM1L	1
BP	GO:0019693	ribose phosphate metabolic process	2/39	473/18614	0.260864	0.298513	0.179746	DNM1L/MTOR	2
BP	GO:0008584	male gonad development	1/39	144/18614	0.261543	0.298749	0.179888	BCL2	1
BP	GO:0014065	phosphatidylinositol 3-kinase signaling	1/39	144/18614	0.261543	0.298749	0.179888	PIK3R1	1
BP	GO:0042552	myelination	1/39	144/18614	0.261543	0.298749	0.179888	MTOR	1
BP	GO:0016570	histone modification	2/39	475/18614	0.262427	0.299397	0.180279	MYBBP1A/TP53	2
BP	GO:0022613	ribonucleoprotein complex biogenesis	2/39	475/18614	0.262427	0.299397	0.180279	ATM/MYBBP1A	2
BP	GO:0046546	development of primary male sexual characteristics	1/39	145/18614	0.263102	0.299807	0.180525	BCL2	1
BP	GO:0051783	regulation of nuclear division	1/39	145/18614	0.263102	0.299807	0.180525	ATM	1
BP	GO:0007224	smoothened signaling pathway	1/39	146/18614	0.264658	0.300085	0.180693	PRKACB	1
BP	GO:0007272	ensheathment of neurons	1/39	146/18614	0.264658	0.300085	0.180693	MTOR	1
BP	GO:0008366	axon ensheathment	1/39	146/18614	0.264658	0.300085	0.180693	MTOR	1
BP	GO:0010508	positive regulation of autophagy	1/39	146/18614	0.264658	0.300085	0.180693	ENDOG	1
BP	GO:0050714	positive regulation of protein secretion	1/39	146/18614	0.264658	0.300085	0.180693	DNM1L	1
BP	GO:0055123	digestive system development	1/39	146/18614	0.264658	0.300085	0.180693	BCL2	1
BP	GO:0062013	positive regulation of small molecule metabolic process	1/39	146/18614	0.264658	0.300085	0.180693	MTOR	1
BP	GO:0072073	kidney epithelium development	1/39	146/18614	0.264658	0.300085	0.180693	BCL2	1
BP	GO:0034765	regulation of monoatomic ion transmembrane transport	2/39	478/18614	0.264771	0.300085	0.180693	BCL2/PPP3CC	2
BP	GO:0061564	axon development	2/39	479/18614	0.265553	0.300791	0.181118	PRKCQ/BCL2	2
BP	GO:0017015	regulation of transforming growth factor beta receptor signaling pathway	1/39	148/18614	0.267761	0.303085	0.182499	TP53	1
BP	GO:0045785	positive regulation of cell adhesion	2/39	482/18614	0.267898	0.303085	0.182499	PRKCQ/ATM	2
BP	GO:0007264	small GTPase mediated signal transduction	2/39	483/18614	0.26868	0.303788	0.182923	TP53/ARHGAP10	2
BP	GO:0015748	organophosphate ester transport	1/39	149/18614	0.269307	0.304134	0.183131	FASLG	1
BP	GO:0051592	response to calcium ion	1/39	149/18614	0.269307	0.304134	0.183131	ENDOG	1
BP	GO:0050768	negative regulation of neurogenesis	1/39	150/18614	0.270851	0.305513	0.183961	TP53	1
BP	GO:0061351	neural precursor cell proliferation	1/39	150/18614	0.270851	0.305513	0.183961	TP53	1
BP	GO:0016525	negative regulation of angiogenesis	1/39	151/18614	0.272391	0.306703	0.184677	FASLG	1
BP	GO:0045834	positive regulation of lipid metabolic process	1/39	151/18614	0.272391	0.306703	0.184677	MTOR	1
BP	GO:1903844	regulation of cellular response to transforming growth factor beta stimulus	1/39	151/18614	0.272391	0.306703	0.184677	TP53	1
BP	GO:0016331	morphogenesis of embryonic epithelium	1/39	152/18614	0.273928	0.307519	0.185169	PRKACB	1
BP	GO:0043535	regulation of blood vessel endothelial cell migration	1/39	152/18614	0.273928	0.307519	0.185169	AKT3	1
BP	GO:0071322	cellular response to carbohydrate stimulus	1/39	152/18614	0.273928	0.307519	0.185169	ENDOG	1
BP	GO:0072006	nephron development	1/39	152/18614	0.273928	0.307519	0.185169	BCL2	1
BP	GO:1904064	positive regulation of cation transmembrane transport	1/39	152/18614	0.273928	0.307519	0.185169	PPP3CC	1
BP	GO:0006352	DNA-templated transcription initiation	1/39	153/18614	0.275461	0.308328	0.185656	TP53	1
BP	GO:0016573	histone acetylation	1/39	153/18614	0.275461	0.308328	0.185656	MYBBP1A	1
BP	GO:0032368	regulation of lipid transport	1/39	153/18614	0.275461	0.308328	0.185656	FASLG	1
BP	GO:0046718	viral entry into host cell	1/39	153/18614	0.275461	0.308328	0.185656	GSN	1
BP	GO:2000181	negative regulation of blood vessel morphogenesis	1/39	153/18614	0.275461	0.308328	0.185656	FASLG	1
BP	GO:0035148	tube formation	1/39	154/18614	0.276992	0.309493	0.186358	PRKACB	1
BP	GO:1901343	negative regulation of vasculature development	1/39	154/18614	0.276992	0.309493	0.186358	FASLG	1
BP	GO:2001257	regulation of cation channel activity	1/39	154/18614	0.276992	0.309493	0.186358	PPP3CC	1
BP	GO:0030010	establishment of cell polarity	1/39	155/18614	0.27852	0.31065	0.187054	GSN	1
BP	GO:0043524	negative regulation of neuron apoptotic process	1/39	155/18614	0.27852	0.31065	0.187054	BCL2	1
BP	GO:0070507	regulation of microtubule cytoskeleton organization	1/39	155/18614	0.27852	0.31065	0.187054	CHMP7	1
BP	GO:0007584	response to nutrient	1/39	156/18614	0.280044	0.3118	0.187747	MTOR	1
BP	GO:0048284	organelle fusion	1/39	156/18614	0.280044	0.3118	0.187747	CHMP7	1
BP	GO:0051961	negative regulation of nervous system development	1/39	156/18614	0.280044	0.3118	0.187747	TP53	1
BP	GO:0007043	cell-cell junction assembly	1/39	157/18614	0.281565	0.312942	0.188434	IKBKB	1
BP	GO:0048754	branching morphogenesis of an epithelial tube	1/39	157/18614	0.281565	0.312942	0.188434	BCL2	1
BP	GO:0050905	neuromuscular process	1/39	157/18614	0.281565	0.312942	0.188434	MTOR	1
BP	GO:0002181	cytoplasmic translation	1/39	159/18614	0.284598	0.316127	0.190353	MTOR	1
BP	GO:0006261	DNA-templated DNA replication	1/39	160/18614	0.28611	0.317249	0.191028	ENDOG	1
BP	GO:0010951	negative regulation of endopeptidase activity	1/39	160/18614	0.28611	0.317249	0.191028	BIRC3	1
BP	GO:0044409	entry into host	1/39	160/18614	0.28611	0.317249	0.191028	GSN	1
BP	GO:0018393	internal peptidyl-lysine acetylation	1/39	161/18614	0.287619	0.318549	0.191811	MYBBP1A	1
BP	GO:0035051	cardiocyte differentiation	1/39	161/18614	0.287619	0.318549	0.191811	MTOR	1
BP	GO:0006475	internal protein amino acid acetylation	1/39	163/18614	0.290627	0.32113	0.193365	MYBBP1A	1
BP	GO:0021915	neural tube development	1/39	163/18614	0.290627	0.32113	0.193365	PRKACB	1
BP	GO:0051100	negative regulation of binding	1/39	163/18614	0.290627	0.32113	0.193365	MAPK8	1
BP	GO:0051236	establishment of RNA localization	1/39	163/18614	0.290627	0.32113	0.193365	ATM	1
BP	GO:0035966	response to topologically incorrect protein	1/39	164/18614	0.292126	0.322598	0.194249	PIK3R1	1
BP	GO:0007034	vacuolar transport	1/39	165/18614	0.293622	0.323685	0.194903	CHMP7	1
BP	GO:0007519	skeletal muscle tissue development	1/39	165/18614	0.293622	0.323685	0.194903	BCL2	1
BP	GO:0048639	positive regulation of developmental growth	1/39	165/18614	0.293622	0.323685	0.194903	BCL2	1
BP	GO:0003205	cardiac chamber development	1/39	166/18614	0.295116	0.324953	0.195667	TP53	1
BP	GO:0031960	response to corticosteroid	1/39	166/18614	0.295116	0.324953	0.195667	BCL2	1
BP	GO:0046661	male sex differentiation	1/39	168/18614	0.298093	0.32785	0.197411	BCL2	1
BP	GO:0051250	negative regulation of lymphocyte activation	1/39	168/18614	0.298093	0.32785	0.197411	ATM	1
BP	GO:0007568	aging	1/39	169/18614	0.299577	0.32891	0.198049	ENDOG	1
BP	GO:0034250	positive regulation of amide metabolic process	1/39	169/18614	0.299577	0.32891	0.198049	MTOR	1
BP	GO:0090101	negative regulation of transmembrane receptor protein serine/threonine kinase signaling pathway	1/39	169/18614	0.299577	0.32891	0.198049	TP53	1
BP	GO:1903034	regulation of response to wounding	1/39	170/18614	0.301058	0.330344	0.198913	MTOR	1
BP	GO:0000724	double-strand break repair via homologous recombination	1/39	171/18614	0.302536	0.331774	0.199774	ATM	1
BP	GO:0001837	epithelial to mesenchymal transition	1/39	172/18614	0.304011	0.332814	0.2004	MTOR	1
BP	GO:0018394	peptidyl-lysine acetylation	1/39	172/18614	0.304011	0.332814	0.2004	MYBBP1A	1
BP	GO:0048015	phosphatidylinositol-mediated signaling	1/39	172/18614	0.304011	0.332814	0.2004	PIK3R1	1
BP	GO:0000725	recombinational repair	1/39	175/18614	0.308417	0.337248	0.20307	ATM	1
BP	GO:0034767	positive regulation of monoatomic ion transmembrane transport	1/39	175/18614	0.308417	0.337248	0.20307	PPP3CC	1
BP	GO:0048017	inositol lipid-mediated signaling	1/39	176/18614	0.30988	0.338652	0.203915	PIK3R1	1
BP	GO:0010469	regulation of signaling receptor activity	1/39	177/18614	0.31134	0.339855	0.20464	ANKRD13C	1
BP	GO:0022900	electron transport chain	1/39	177/18614	0.31134	0.339855	0.20464	MYBBP1A	1
BP	GO:0032635	interleukin-6 production	1/39	178/18614	0.312796	0.340856	0.205243	IRAK3	1
BP	GO:0032675	regulation of interleukin-6 production	1/39	178/18614	0.312796	0.340856	0.205243	IRAK3	1
BP	GO:0060538	skeletal muscle organ development	1/39	178/18614	0.312796	0.340856	0.205243	BCL2	1
BP	GO:0007204	positive regulation of cytosolic calcium ion concentration	1/39	179/18614	0.31425	0.342047	0.20596	BCL2	1
BP	GO:0043534	blood vessel endothelial cell migration	1/39	179/18614	0.31425	0.342047	0.20596	AKT3	1
BP	GO:0035265	organ growth	1/39	180/18614	0.315701	0.343429	0.206792	BCL2	1
BP	GO:0048771	tissue remodeling	1/39	181/18614	0.317149	0.344806	0.207621	TP53	1
BP	GO:0043484	regulation of RNA splicing	1/39	182/18614	0.318593	0.345781	0.208208	PIK3R1	1
BP	GO:0046890	regulation of lipid biosynthetic process	1/39	182/18614	0.318593	0.345781	0.208208	MTOR	1
BP	GO:1905952	regulation of lipid localization	1/39	182/18614	0.318593	0.345781	0.208208	FASLG	1
BP	GO:0031503	protein-containing complex localization	1/39	183/18614	0.320035	0.34675	0.208792	ATM	1
BP	GO:0042129	regulation of T cell proliferation	1/39	183/18614	0.320035	0.34675	0.208792	PRKCQ	1
BP	GO:0043409	negative regulation of MAPK cascade	1/39	183/18614	0.320035	0.34675	0.208792	IRAK3	1
BP	GO:0048469	cell maturation	1/39	184/18614	0.321474	0.34811	0.209611	BCL2	1
BP	GO:0000910	cytokinesis	1/39	185/18614	0.32291	0.349067	0.210187	CHMP7	1
BP	GO:0001936	regulation of endothelial cell proliferation	1/39	185/18614	0.32291	0.349067	0.210187	AKT3	1
BP	GO:0099173	postsynapse organization	1/39	185/18614	0.32291	0.349067	0.210187	FNTA	1
BP	GO:0051896	regulation of protein kinase B signaling	1/39	186/18614	0.324343	0.350416	0.210999	MTOR	1
BP	GO:0006006	glucose metabolic process	1/39	187/18614	0.325773	0.35156	0.211688	TP53	1
BP	GO:0007565	female pregnancy	1/39	187/18614	0.325773	0.35156	0.211688	BCL2	1
BP	GO:0002040	sprouting angiogenesis	1/39	188/18614	0.3272	0.352698	0.212373	AKT3	1
BP	GO:0061138	morphogenesis of a branching epithelium	1/39	188/18614	0.3272	0.352698	0.212373	BCL2	1
BP	GO:0031099	regeneration	1/39	190/18614	0.330045	0.355563	0.214098	BCL2	1
BP	GO:0050777	negative regulation of immune response	1/39	191/18614	0.331463	0.356888	0.214896	IRAK3	1
BP	GO:0009755	hormone-mediated signaling pathway	1/39	192/18614	0.332878	0.358208	0.215691	APPL1	1
BP	GO:0032872	regulation of stress-activated MAPK cascade	1/39	193/18614	0.33429	0.359523	0.216483	TRAF2	1
BP	GO:0009749	response to glucose	1/39	194/18614	0.3357	0.360426	0.217026	ENDOG	1
BP	GO:0043433	negative regulation of DNA-binding transcription factor activity	1/39	194/18614	0.3357	0.360426	0.217026	IRAK3	1
BP	GO:0045664	regulation of neuron differentiation	1/39	194/18614	0.3357	0.360426	0.217026	BCL2	1
BP	GO:0043488	regulation of mRNA stability	1/39	195/18614	0.337106	0.361526	0.217689	TRAF2	1
BP	GO:0071902	positive regulation of protein serine/threonine kinase activity	1/39	195/18614	0.337106	0.361526	0.217689	TRAF2	1
BP	GO:0007369	gastrulation	1/39	196/18614	0.33851	0.362416	0.218225	TP53	1
BP	GO:0070302	regulation of stress-activated protein kinase signaling cascade	1/39	196/18614	0.33851	0.362416	0.218225	TRAF2	1
BP	GO:0140013	meiotic nuclear division	1/39	196/18614	0.33851	0.362416	0.218225	ATM	1
BP	GO:0001906	cell killing	1/39	197/18614	0.339911	0.363505	0.21888	MAPK8	1
BP	GO:0006403	RNA localization	1/39	197/18614	0.339911	0.363505	0.21888	ATM	1
BP	GO:0099504	synaptic vesicle cycle	1/39	198/18614	0.341308	0.364794	0.219656	PPP3CC	1
BP	GO:0009746	response to hexose	1/39	199/18614	0.342703	0.366078	0.22043	ENDOG	1
BP	GO:0007626	locomotory behavior	1/39	201/18614	0.345485	0.368634	0.221968	MTOR	1
BP	GO:0043393	regulation of protein binding	1/39	201/18614	0.345485	0.368634	0.221968	MAPK8	1
BP	GO:0002695	negative regulation of leukocyte activation	1/39	202/18614	0.346871	0.369904	0.222734	ATM	1
BP	GO:0001763	morphogenesis of a branching structure	1/39	203/18614	0.348254	0.371171	0.223496	BCL2	1
BP	GO:1902075	cellular response to salt	1/39	204/18614	0.349635	0.372433	0.224256	ENDOG	1
BP	GO:0034284	response to monosaccharide	1/39	207/18614	0.35376	0.376192	0.22652	ENDOG	1
BP	GO:0043487	regulation of RNA stability	1/39	207/18614	0.35376	0.376192	0.22652	TRAF2	1
BP	GO:0044703	multi-organism reproductive process	1/39	207/18614	0.35376	0.376192	0.22652	BCL2	1
BP	GO:0006473	protein acetylation	1/39	208/18614	0.355129	0.377436	0.227269	MYBBP1A	1
BP	GO:0002064	epithelial cell development	1/39	210/18614	0.357859	0.380125	0.228888	IKBKB	1
BP	GO:0002377	immunoglobulin production	1/39	212/18614	0.360578	0.38237	0.230239	TRAF2	1
BP	GO:0061013	regulation of mRNA catabolic process	1/39	212/18614	0.360578	0.38237	0.230239	TRAF2	1
BP	GO:0098739	import across plasma membrane	1/39	212/18614	0.360578	0.38237	0.230239	PPP3CC	1
BP	GO:0031396	regulation of protein ubiquitination	1/39	213/18614	0.361933	0.383592	0.230976	BIRC3	1
BP	GO:0045216	cell-cell junction organization	1/39	214/18614	0.363285	0.384595	0.23158	IKBKB	1
BP	GO:1901888	regulation of cell junction assembly	1/39	214/18614	0.363285	0.384595	0.23158	IKBKB	1
BP	GO:0043491	protein kinase B signaling	1/39	215/18614	0.364635	0.385593	0.23218	MTOR	1
BP	GO:1903046	meiotic cell cycle process	1/39	215/18614	0.364635	0.385593	0.23218	ATM	1
BP	GO:0044706	multi-multicellular organism process	1/39	216/18614	0.365981	0.386801	0.232908	BCL2	1
BP	GO:0006469	negative regulation of protein kinase activity	1/39	217/18614	0.367325	0.388005	0.233633	IRAK3	1
BP	GO:0006457	protein folding	1/39	220/18614	0.371341	0.39181	0.235924	DFFA	1
BP	GO:0099003	vesicle-mediated transport in synapse	1/39	220/18614	0.371341	0.39181	0.235924	PPP3CC	1
BP	GO:0043583	ear development	1/39	221/18614	0.372674	0.392997	0.236639	BCL2	1
BP	GO:0007596	blood coagulation	1/39	224/18614	0.376656	0.396755	0.238902	PRKCQ	1
BP	GO:0071222	cellular response to lipopolysaccharide	1/39	224/18614	0.376656	0.396755	0.238902	MAPK8	1
BP	GO:0007411	axon guidance	1/39	225/18614	0.377978	0.397485	0.239341	PRKCQ	1
BP	GO:0050866	negative regulation of cell activation	1/39	225/18614	0.377978	0.397485	0.239341	ATM	1
BP	GO:0097485	neuron projection guidance	1/39	225/18614	0.377978	0.397485	0.239341	PRKCQ	1
BP	GO:0007163	establishment or maintenance of cell polarity	1/39	226/18614	0.379297	0.398651	0.240043	GSN	1
BP	GO:0019318	hexose metabolic process	1/39	228/18614	0.381927	0.401193	0.241574	TP53	1
BP	GO:0050817	coagulation	1/39	229/18614	0.383238	0.402347	0.242269	PRKCQ	1
BP	GO:0007599	hemostasis	1/39	230/18614	0.384547	0.403274	0.242827	PRKCQ	1
BP	GO:0050920	regulation of chemotaxis	1/39	230/18614	0.384547	0.403274	0.242827	DNM1L	1
BP	GO:0022618	ribonucleoprotein complex assembly	1/39	231/18614	0.385852	0.404196	0.243382	ATM	1
BP	GO:0043270	positive regulation of monoatomic ion transport	1/39	231/18614	0.385852	0.404196	0.243382	PPP3CC	1
BP	GO:0010594	regulation of endothelial cell migration	1/39	232/18614	0.387155	0.405113	0.243934	AKT3	1
BP	GO:0050769	positive regulation of neurogenesis	1/39	232/18614	0.387155	0.405113	0.243934	MTOR	1
BP	GO:2001234	negative regulation of apoptotic signaling pathway	1/39	233/18614	0.388455	0.406249	0.244618	BCL2	1
BP	GO:0007188	adenylate cyclase-modulating G protein-coupled receptor signaling pathway	1/39	234/18614	0.389753	0.407156	0.245165	PRKACB	1
BP	GO:0009743	response to carbohydrate	1/39	234/18614	0.389753	0.407156	0.245165	ENDOG	1
BP	GO:0010001	glial cell differentiation	1/39	235/18614	0.391048	0.408059	0.245708	MTOR	1
BP	GO:0060348	bone development	1/39	235/18614	0.391048	0.408059	0.245708	TP53	1
BP	GO:0010466	negative regulation of peptidase activity	1/39	236/18614	0.39234	0.409182	0.246384	BIRC3	1
BP	GO:0071219	cellular response to molecule of bacterial origin	1/39	237/18614	0.39363	0.410301	0.247058	MAPK8	1
BP	GO:0033673	negative regulation of kinase activity	1/39	239/18614	0.396201	0.412528	0.248399	IRAK3	1
BP	GO:0071826	ribonucleoprotein complex subunit organization	1/39	239/18614	0.396201	0.412528	0.248399	ATM	1
BP	GO:0002274	myeloid leukocyte activation	1/39	240/18614	0.397482	0.413635	0.249065	ATM	1
BP	GO:0030595	leukocyte chemotaxis	1/39	241/18614	0.398761	0.414738	0.24973	DNM1L	1
BP	GO:0009636	response to toxic substance	1/39	242/18614	0.400037	0.415381	0.250117	BCL2	1
BP	GO:0065004	protein-DNA complex assembly	1/39	242/18614	0.400037	0.415381	0.250117	TP53	1
BP	GO:1901617	organic hydroxy compound biosynthetic process	1/39	242/18614	0.400037	0.415381	0.250117	APPL1	1
BP	GO:0045333	cellular respiration	1/39	243/18614	0.401311	0.416247	0.250639	MYBBP1A	1
BP	GO:0048738	cardiac muscle tissue development	1/39	243/18614	0.401311	0.416247	0.250639	MTOR	1
BP	GO:0071695	anatomical structure maturation	1/39	247/18614	0.406379	0.421274	0.253665	BCL2	1
BP	GO:0016197	endosomal transport	1/39	248/18614	0.407639	0.422349	0.254313	CHMP7	1
BP	GO:0050870	positive regulation of T cell activation	1/39	249/18614	0.408897	0.423421	0.254958	PRKCQ	1
BP	GO:0001649	osteoblast differentiation	1/39	250/18614	0.410153	0.424026	0.255322	MYBBP1A	1
BP	GO:0006959	humoral immune response	1/39	250/18614	0.410153	0.424026	0.255322	BCL2	1
BP	GO:0043543	protein acylation	1/39	250/18614	0.410153	0.424026	0.255322	MYBBP1A	1
BP	GO:0032886	regulation of microtubule-based process	1/39	252/18614	0.412655	0.42638	0.25674	CHMP7	1
BP	GO:1903320	regulation of protein modification by small protein conjugation or removal	1/39	255/18614	0.41639	0.430005	0.258923	BIRC3	1
BP	GO:0005996	monosaccharide metabolic process	1/39	256/18614	0.41763	0.43105	0.259552	TP53	1
BP	GO:0014706	striated muscle tissue development	1/39	259/18614	0.421334	0.434637	0.261711	MTOR	1
BP	GO:0090068	positive regulation of cell cycle process	1/39	262/18614	0.425015	0.438195	0.263854	CHEK2	1
BP	GO:0071824	protein-DNA complex subunit organization	1/39	263/18614	0.426237	0.439216	0.264469	TP53	1
BP	GO:0098657	import into cell	1/39	265/18614	0.428673	0.441486	0.265836	PPP3CC	1
BP	GO:0090150	establishment of protein localization to membrane	1/39	271/18614	0.435921	0.448708	0.270184	MAPK8	1
BP	GO:1903039	positive regulation of leukocyte cell-cell adhesion	1/39	273/18614	0.438317	0.450929	0.271522	PRKCQ	1
BP	GO:0050708	regulation of protein secretion	1/39	275/18614	0.440704	0.453138	0.272852	DNM1L	1
BP	GO:0032412	regulation of monoatomic ion transmembrane transporter activity	1/39	278/18614	0.444264	0.456551	0.274907	PPP3CC	1
BP	GO:0051962	positive regulation of nervous system development	1/39	280/18614	0.446626	0.45873	0.276219	MTOR	1
BP	GO:0031348	negative regulation of defense response	1/39	284/18614	0.45132	0.463049	0.27882	IRAK3	1
BP	GO:0051321	meiotic cell cycle	1/39	284/18614	0.45132	0.463049	0.27882	ATM	1
BP	GO:1903532	positive regulation of secretion by cell	1/39	289/18614	0.457133	0.468759	0.282258	DNM1L	1
BP	GO:0042254	ribosome biogenesis	1/39	298/18614	0.467445	0.478815	0.288313	MYBBP1A	1
BP	GO:0051056	regulation of small GTPase mediated signal transduction	1/39	298/18614	0.467445	0.478815	0.288313	ARHGAP10	1
BP	GO:0030522	intracellular receptor signaling pathway	1/39	299/18614	0.468579	0.479718	0.288856	BIRC3	1
BP	GO:0090092	regulation of transmembrane receptor protein serine/threonine kinase signaling pathway	1/39	301/18614	0.47084	0.481772	0.290093	TP53	1
BP	GO:0043588	skin development	1/39	308/18614	0.478679	0.489529	0.294764	BCL2	1
BP	GO:0007162	negative regulation of cell adhesion	1/39	312/18614	0.483108	0.493792	0.297331	PIK3R1	1
BP	GO:0051047	positive regulation of secretion	1/39	317/18614	0.488593	0.499128	0.300544	DNM1L	1
BP	GO:0021700	developmental maturation	1/39	319/18614	0.49077	0.501083	0.301721	BCL2	1
BP	GO:0022409	positive regulation of cell-cell adhesion	1/39	321/18614	0.492939	0.503026	0.302892	PRKCQ	1
BP	GO:0009101	glycoprotein biosynthetic process	1/39	324/18614	0.496176	0.506056	0.304716	BCL2	1
BP	GO:0048638	regulation of developmental growth	1/39	328/18614	0.50046	0.510151	0.307182	BCL2	1
BP	GO:1903311	regulation of mRNA metabolic process	1/39	329/18614	0.501525	0.510962	0.30767	TRAF2	1
BP	GO:0007265	Ras protein signal transduction	1/39	333/18614	0.505764	0.515005	0.310104	TP53	1
BP	GO:0048545	response to steroid hormone	1/39	339/18614	0.512058	0.521133	0.313794	BCL2	1
BP	GO:0001933	negative regulation of protein phosphorylation	1/39	341/18614	0.514138	0.52297	0.3149	IRAK3	1
BP	GO:0019216	regulation of lipid metabolic process	1/39	344/18614	0.517243	0.525845	0.316632	MTOR	1
BP	GO:0090287	regulation of cellular response to growth factor stimulus	1/39	345/18614	0.518273	0.52661	0.317092	TP53	1
BP	GO:0007517	muscle organ development	1/39	351/18614	0.524412	0.532562	0.320676	BCL2	1
BP	GO:0045787	positive regulation of cell cycle	1/39	354/18614	0.527452	0.535362	0.322362	CHEK2	1
BP	GO:0043087	regulation of GTPase activity	1/39	364/18614	0.537451	0.545219	0.328297	MTOR	1
BP	GO:0060271	cilium assembly	1/39	367/18614	0.54041	0.547928	0.329928	GSN	1
BP	GO:0051098	regulation of binding	1/39	369/18614	0.542373	0.549624	0.33095	MAPK8	1
BP	GO:0001818	negative regulation of cytokine production	1/39	371/18614	0.544327	0.551309	0.331965	IRAK3	1
BP	GO:0009306	protein secretion	1/39	373/18614	0.546273	0.552985	0.332974	DNM1L	1
BP	GO:0018205	peptidyl-lysine modification	1/39	374/18614	0.547243	0.553376	0.333209	MYBBP1A	1
BP	GO:0035592	establishment of protein localization to extracellular region	1/39	374/18614	0.547243	0.553376	0.333209	DNM1L	1
BP	GO:0008544	epidermis development	1/39	375/18614	0.548211	0.553764	0.333442	BCL2	1
BP	GO:0030336	negative regulation of cell migration	1/39	375/18614	0.548211	0.553764	0.333442	BCL2	1
BP	GO:0050863	regulation of T cell activation	1/39	377/18614	0.550141	0.555417	0.334438	PRKCQ	1
BP	GO:1903037	regulation of leukocyte cell-cell adhesion	1/39	378/18614	0.551103	0.556092	0.334845	PRKCQ	1
BP	GO:0071692	protein localization to extracellular region	1/39	382/18614	0.554932	0.559657	0.336991	DNM1L	1
BP	GO:0042326	negative regulation of phosphorylation	1/39	383/18614	0.555884	0.560021	0.33721	IRAK3	1
BP	GO:1902074	response to salt	1/39	383/18614	0.555884	0.560021	0.33721	ENDOG	1
BP	GO:0044282	small molecule catabolic process	1/39	388/18614	0.560614	0.564487	0.339899	TP53	1
BP	GO:2000146	negative regulation of cell motility	1/39	390/18614	0.562493	0.566077	0.340857	BCL2	1
BP	GO:0044782	cilium organization	1/39	396/18614	0.568081	0.571398	0.344061	GSN	1
BP	GO:0009100	glycoprotein metabolic process	1/39	401/18614	0.572685	0.575723	0.346665	BCL2	1
BP	GO:0007159	leukocyte cell-cell adhesion	1/39	415/18614	0.585323	0.588116	0.354127	PRKCQ	1
BP	GO:0040013	negative regulation of locomotion	1/39	427/18614	0.595865	0.598391	0.360314	BCL2	1
BP	GO:0034470	ncRNA processing	1/39	432/18614	0.60018	0.602405	0.362731	TP53	1
BP	GO:0032102	negative regulation of response to external stimulus	1/39	446/18614	0.612025	0.613969	0.369694	IRAK3	1
BP	GO:0006869	lipid transport	1/39	447/18614	0.612858	0.614479	0.370001	FASLG	1
BP	GO:0048568	embryonic organ development	1/39	453/18614	0.617818	0.619125	0.372799	TP53	1
BP	GO:0008380	RNA splicing	1/39	466/18614	0.628355	0.629351	0.378956	PIK3R1	1
BP	GO:0022407	regulation of cell-cell adhesion	1/39	491/18614	0.647827	0.648512	0.390494	PRKCQ	1
BP	GO:0043410	positive regulation of MAPK cascade	1/39	495/18614	0.650849	0.651193	0.392108	TRAF2	1
BP	GO:0010876	lipid localization	1/39	497/18614	0.652351	0.652351	0.392805	FASLG	1
CC	GO:0016605	PML body	4/38	105/19518	5.07065e-05	0.00633832	0.0045369	TP53/SATB1/MTOR/CHEK2	4
CC	GO:0035631	CD40 receptor complex	2/38	11/19518	0.000200767	0.0122284	0.00875295	TRAF2/IKBKB	2
CC	GO:0045121	membrane raft	5/38	323/19518	0.000385814	0.0122284	0.00875295	FASLG/BIRC3/TNFRSF10A/TRAF2/IKBKB	5
CC	GO:0098857	membrane microdomain	5/38	324/19518	0.000391308	0.0122284	0.00875295	FASLG/BIRC3/TNFRSF10A/TRAF2/IKBKB	5
CC	GO:0045335	phagocytic vesicle	3/38	141/19518	0.00258743	0.0646858	0.0463014	APPL1/MTOR/GSN	3
CC	GO:0009898	cytoplasmic side of plasma membrane	3/38	159/19518	0.00363094	0.0756445	0.0541456	CHMP7/TRAF2/IKBKB	3
CC	GO:0098562	cytoplasmic side of membrane	3/38	193/19518	0.00622675	0.111192	0.07959	CHMP7/TRAF2/IKBKB	3
CC	GO:0005741	mitochondrial outer membrane	3/38	208/19518	0.0076488	0.119513	0.0855458	BCL2/DNM1L/MTOR	3
CC	GO:0030864	cortical actin cytoskeleton	2/38	73/19518	0.0088915	0.123493	0.088395	SPTAN1/GSN	2
CC	GO:0031968	organelle outer membrane	3/38	236/19518	0.0107823	0.125348	0.0897225	BCL2/DNM1L/MTOR	3
CC	GO:0019867	outer membrane	3/38	238/19518	0.0110306	0.125348	0.0897225	BCL2/DNM1L/MTOR	3
CC	GO:0030863	cortical cytoskeleton	2/38	104/19518	0.0174499	0.12757	0.0913135	SPTAN1/GSN	2
CC	GO:0038201	TOR complex	1/38	10/19518	0.0193039	0.12757	0.0913135	MTOR	1
CC	GO:0042564	NLS-dependent protein nuclear import complex	1/38	10/19518	0.0193039	0.12757	0.0913135	MYBBP1A	1
CC	GO:0097136	Bcl-2 family protein complex	1/38	10/19518	0.0193039	0.12757	0.0913135	BCL2	1
CC	GO:0005938	cell cortex	3/38	302/19518	0.0207581	0.12757	0.0913135	SPTAN1/TRAF2/GSN	3
CC	GO:0000815	ESCRT III complex	1/38	11/19518	0.0212142	0.12757	0.0913135	CHMP7	1
CC	GO:0061695	transferase complex, transferring phosphorus-containing groups	3/38	306/19518	0.0214827	0.12757	0.0913135	PRKACB/PIK3R1/IKBKB	3
CC	GO:0031074	nucleocytoplasmic transport complex	1/38	12/19518	0.0231209	0.12757	0.0913135	MYBBP1A	1
CC	GO:1904930	amphisome membrane	1/38	12/19518	0.0231209	0.12757	0.0913135	CHMP7	1
CC	GO:1902554	serine/threonine protein kinase complex	2/38	121/19518	0.0231698	0.12757	0.0913135	PRKACB/IKBKB	2
CC	GO:0032009	early phagosome	1/38	13/19518	0.025024	0.12757	0.0913135	APPL1	1
CC	GO:0060205	cytoplasmic vesicle lumen	3/38	325/19518	0.0251137	0.12757	0.0913135	FASLG/SPTAN1/GSN	3
CC	GO:0016363	nuclear matrix	2/38	127/19518	0.0253495	0.12757	0.0913135	TP53/SATB1	2
CC	GO:0031983	vesicle lumen	3/38	327/19518	0.0255141	0.12757	0.0913135	FASLG/SPTAN1/GSN	3
CC	GO:0044753	amphisome	1/38	14/19518	0.0269235	0.12944	0.0926517	CHMP7	1
CC	GO:0030139	endocytic vesicle	3/38	347/19518	0.0297086	0.13146	0.0940977	APPL1/MTOR/GSN	3
CC	GO:1902911	protein kinase complex	2/38	142/19518	0.0311468	0.13146	0.0940977	PRKACB/IKBKB	2
CC	GO:0005777	peroxisome	2/38	143/19518	0.0315504	0.13146	0.0940977	ATM/DNM1L	2
CC	GO:0042579	microbody	2/38	143/19518	0.0315504	0.13146	0.0940977	ATM/DNM1L	2
CC	GO:0034399	nuclear periphery	2/38	147/19518	0.0331856	0.133813	0.0957819	TP53/SATB1	2
CC	GO:0097038	perinuclear endoplasmic reticulum	1/38	19/19518	0.0363669	0.142058	0.101684	PIK3R1	1
CC	GO:0098687	chromosomal region	3/38	390/19518	0.0398922	0.147497	0.105577	ATM/CHMP7/CHEK2	3
CC	GO:0005828	kinetochore microtubule	1/38	21/19518	0.0401192	0.147497	0.105577	CHMP7	1
CC	GO:1990391	DNA repair complex	1/38	22/19518	0.04199	0.148438	0.106251	ATM	1
CC	GO:0000781	chromosome, telomeric region	2/38	169/19518	0.0427503	0.148438	0.106251	ATM/CHEK2	2
CC	GO:0005819	spindle	3/38	421/19518	0.0482042	0.154493	0.110585	ATM/TFDP2/CHMP7	3
CC	GO:0001726	ruffle	2/38	181/19518	0.048352	0.154493	0.110585	APPL1/BMX	2
CC	GO:0031252	cell leading edge	3/38	422/19518	0.0484856	0.154493	0.110585	APPL1/GSN/BMX	3
CC	GO:0046930	pore complex	1/38	26/19518	0.0494379	0.154493	0.110585	BCL2	1
CC	GO:0036452	ESCRT complex	1/38	28/19518	0.0531407	0.159845	0.114416	CHMP7	1
CC	GO:0005942	phosphatidylinositol 3-kinase complex	1/38	29/19518	0.0549868	0.159845	0.114416	PIK3R1	1
CC	GO:0032585	multivesicular body membrane	1/38	29/19518	0.0549868	0.159845	0.114416	CHMP7	1
CC	GO:0002102	podosome	1/38	30/19518	0.0568294	0.161447	0.115562	GSN	1
CC	GO:0016235	aggresome	1/38	36/19518	0.0678118	0.188366	0.13483	PRKCQ	1
CC	GO:0005635	nuclear envelope	3/38	490/19518	0.0695023	0.188865	0.135188	BCL2/CHMP7/MTOR	3
CC	GO:0001772	immunological synapse	1/38	43/19518	0.0804672	0.214009	0.153185	PRKCQ	1
CC	GO:0097546	ciliary base	1/38	47/19518	0.0876236	0.227578	0.162898	PRKACB	1
CC	GO:0043209	myelin sheath	1/38	49/19518	0.0911815	0.227578	0.162898	BCL2	1
CC	GO:0000421	autophagosome membrane	1/38	51/19518	0.0947258	0.227578	0.162898	CHMP7	1
CC	GO:0005782	peroxisomal matrix	1/38	51/19518	0.0947258	0.227578	0.162898	ATM	1
CC	GO:0031907	microbody lumen	1/38	51/19518	0.0947258	0.227578	0.162898	ATM	1
CC	GO:0008287	protein serine/threonine phosphatase complex	1/38	52/19518	0.0964929	0.227578	0.162898	PPP3CC	1
CC	GO:1903293	phosphatase complex	1/38	54/19518	0.100017	0.231305	0.165566	PPP3CC	1
CC	GO:1904724	tertiary granule lumen	1/38	55/19518	0.101774	0.231305	0.165566	SPTAN1	1
CC	GO:0035580	specific granule lumen	1/38	62/19518	0.11398	0.25442	0.182111	SPTAN1	1
CC	GO:0005657	replication fork	1/38	66/19518	0.120883	0.259746	0.185923	TP53	1
CC	GO:0005771	multivesicular body	1/38	67/19518	0.1226	0.259746	0.185923	CHMP7	1
CC	GO:0043073	germ cell nucleus	1/38	67/19518	0.1226	0.259746	0.185923	TP53	1
CC	GO:0098802	plasma membrane signaling receptor complex	2/38	319/19518	0.127699	0.265688	0.190176	TRAF2/IKBKB	2
CC	GO:0034774	secretory granule lumen	2/38	322/19518	0.129656	0.265688	0.190176	SPTAN1/GSN	2
CC	GO:0005905	clathrin-coated pit	1/38	73/19518	0.132836	0.266059	0.190442	DNM1L	1
CC	GO:0016234	inclusion body	1/38	74/19518	0.134531	0.266059	0.190442	PRKCQ	1
CC	GO:0005801	cis-Golgi network	1/38	75/19518	0.136222	0.266059	0.190442	PIK3R1	1
CC	GO:0017053	transcription repressor complex	1/38	78/19518	0.141277	0.26757	0.191524	TP53	1
CC	GO:0035861	site of double-strand break	1/38	78/19518	0.141277	0.26757	0.191524	TP53	1
CC	GO:0005876	spindle microtubule	1/38	81/19518	0.146303	0.272953	0.195377	CHMP7	1
CC	GO:0005901	caveola	1/38	83/19518	0.149638	0.27507	0.196892	FASLG	1
CC	GO:0016528	sarcoplasm	1/38	90/19518	0.16121	0.292048	0.209045	GSN	1
CC	GO:0070603	SWI/SNF superfamily-type complex	1/38	93/19518	0.166123	0.296648	0.212337	MYBBP1A	1
CC	GO:0005643	nuclear pore	1/38	97/19518	0.172629	0.302514	0.216536	CHMP7	1
CC	GO:0043202	lysosomal lumen	1/38	98/19518	0.174248	0.302514	0.216536	FASLG	1
CC	GO:0032587	ruffle membrane	1/38	101/19518	0.179086	0.306654	0.2195	BMX	1
CC	GO:0005903	brush border	1/38	105/19518	0.185494	0.309993	0.22189	DNM1L	1
CC	GO:0098978	glutamatergic synapse	2/38	410/19518	0.189705	0.309993	0.22189	PPP3CC/APPL1	2
CC	GO:0005765	lysosomal membrane	2/38	415/19518	0.193236	0.309993	0.22189	CHMP7/MTOR	2
CC	GO:0098852	lytic vacuole membrane	2/38	415/19518	0.193236	0.309993	0.22189	CHMP7/MTOR	2
CC	GO:0090734	site of DNA damage	1/38	110/19518	0.193436	0.309993	0.22189	TP53	1
CC	GO:0044853	plasma membrane raft	1/38	114/19518	0.199734	0.310651	0.22236	FASLG	1
CC	GO:0009897	external side of plasma membrane	2/38	426/19518	0.201037	0.310651	0.22236	FASLG/IL1R1	2
CC	GO:0034451	centriolar satellite	1/38	115/19518	0.201302	0.310651	0.22236	PRKCQ	1
CC	GO:0005776	autophagosome	1/38	117/19518	0.204427	0.311627	0.223059	CHMP7	1
CC	GO:1904813	ficolin-1-rich granule lumen	1/38	124/19518	0.215273	0.317362	0.227164	GSN	1
CC	GO:0030672	synaptic vesicle membrane	1/38	125/19518	0.21681	0.317362	0.227164	DNM1L	1
CC	GO:0099501	exocytic vesicle membrane	1/38	125/19518	0.21681	0.317362	0.227164	DNM1L	1
CC	GO:0140534	endoplasmic reticulum protein-containing complex	1/38	126/19518	0.218345	0.317362	0.227164	TRAF2	1
CC	GO:0005774	vacuolar membrane	2/38	460/19518	0.225378	0.321163	0.229885	CHMP7/MTOR	2
CC	GO:0005874	microtubule	2/38	461/19518	0.226098	0.321163	0.229885	CHMP7/DNM1L	2
CC	GO:0072562	blood microparticle	1/38	144/19518	0.245473	0.33889	0.242574	GSN	1
CC	GO:0015629	actin cytoskeleton	2/38	489/19518	0.246334	0.33889	0.242574	SPTAN1/GSN	2
CC	GO:0001650	fibrillar center	1/38	146/19518	0.24843	0.33889	0.242574	MAP3K14	1
CC	GO:1904949	ATPase complex	1/38	147/19518	0.249904	0.33889	0.242574	MYBBP1A	1
CC	GO:0005743	mitochondrial inner membrane	2/38	497/19518	0.252134	0.33889	0.242574	EXOG/ENDOG	2
CC	GO:0031902	late endosome membrane	1/38	155/19518	0.261597	0.342508	0.245164	CHMP7	1
CC	GO:0005875	microtubule associated complex	1/38	156/19518	0.263046	0.342508	0.245164	FNTA	1
CC	GO:0043204	perikaryon	1/38	156/19518	0.263046	0.342508	0.245164	ENDOG	1
CC	GO:0000776	kinetochore	1/38	159/19518	0.267377	0.342877	0.245428	CHMP7	1
CC	GO:0042581	specific granule	1/38	160/19518	0.268815	0.342877	0.245428	SPTAN1	1
CC	GO:0098862	cluster of actin-based cell projections	1/38	162/19518	0.271683	0.343034	0.24554	DNM1L	1
CC	GO:0070820	tertiary granule	1/38	164/19518	0.27454	0.343175	0.245641	SPTAN1	1
CC	GO:0000779	condensed chromosome, centromeric region	1/38	170/19518	0.283046	0.350304	0.250744	CHMP7	1
CC	GO:0005775	vacuolar lumen	1/38	176/19518	0.291454	0.356979	0.255522	FASLG	1
CC	GO:0031256	leading edge membrane	1/38	180/19518	0.297006	0.356979	0.255522	BMX	1
[truncated: 188 more rows]

## Sheet: Table S4
Table S4 KEGG pathway enrichment analysis of the 39-gene PANoptosis set.
ID	Description	GeneRatio	BgRatio	pvalue	p.adjust	qvalue	geneID	Count
hsa04210	Apoptosis	16/31	136/8621	1.46858e-21	2.80498e-19	9.58438e-20	BCL2/FASLG/ATM/AKT3/MAP3K14/TP53/BIRC3/SPTAN1/DFFA/MAPK8/ENDOG/PIK3R1/TNFRSF10A/DFFB/TRAF2/IKBKB	16
hsa05166	Human T-cell leukemia virus 1 infection	11/31	222/8621	1.38896e-10	1.32646e-08	4.53241e-09	PRKACB/PPP3CC/ATM/AKT3/MAP3K14/TP53/MAPK8/PIK3R1/IKBKB/CHEK2/IL1R1	11
hsa05131	Shigellosis	11/31	247/8621	4.36593e-10	2.77964e-08	9.4978e-09	PRKCQ/BCL2/ATM/AKT3/TP53/MAPK8/PIK3R1/TRAF2/MTOR/IKBKB/IL1R1	11
hsa05170	Human immunodeficiency virus 1 infection	2024-10-31	212/8621	1.84897e-09	6.82074e-08	2.33059e-08	BCL2/FASLG/PPP3CC/ATM/AKT3/MAPK8/PIK3R1/TRAF2/MTOR/IKBKB	10
hsa05417	Lipid and atherosclerosis	2024-10-31	215/8621	2.12001e-09	6.82074e-08	2.33059e-08	BCL2/FASLG/PPP3CC/AKT3/TP53/MAPK8/PIK3R1/TNFRSF10A/TRAF2/IKBKB	10
hsa04064	NF-kappa B signaling pathway	2024-08-31	104/8621	2.14264e-09	6.82074e-08	2.33059e-08	PRKCQ/BCL2/ATM/MAP3K14/BIRC3/TRAF2/IKBKB/IL1R1	8
hsa05163	Human cytomegalovirus infection	2024-10-31	225/8621	3.29701e-09	8.99613e-08	3.07391e-08	PRKACB/FASLG/PPP3CC/AKT3/TP53/PIK3R1/TRAF2/MTOR/IKBKB/IL1R1	10
hsa04668	TNF signaling pathway	2024-08-31	114/8621	4.46968e-09	1.06714e-07	3.64632e-08	AKT3/MAP3K14/BIRC3/MAPK8/PIK3R1/TRAF2/DNM1L/IKBKB	8
hsa01524	Platinum drug resistance	2024-07-31	73/8621	5.20446e-09	1.1045e-07	3.77399e-08	BCL2/FASLG/ATM/AKT3/TP53/BIRC3/PIK3R1	7
hsa04722	Neurotrophin signaling pathway	2024-08-31	119/8621	6.29355e-09	1.20207e-07	4.10737e-08	BCL2/FASLG/AKT3/TP53/MAPK8/PIK3R1/IKBKB/IRAK3	8
hsa05210	Colorectal cancer	2024-07-31	86/8621	1.66246e-08	2.72267e-07	9.30315e-08	BCL2/AKT3/TP53/MAPK8/PIK3R1/APPL1/MTOR	7
hsa04380	Osteoclast differentiation	2024-08-31	135/8621	1.71058e-08	2.72267e-07	9.30315e-08	PPP3CC/AKT3/MAP3K14/MAPK8/PIK3R1/TRAF2/IKBKB/IL1R1	8
hsa05222	Small cell lung cancer	2024-07-31	92/8621	2.67089e-08	3.92415e-07	1.34085e-07	BCL2/AKT3/TP53/BIRC3/PIK3R1/TRAF2/IKBKB	7
hsa01522	Endocrine resistance	2024-07-31	98/8621	4.15613e-08	5.67014e-07	1.93744e-07	PRKACB/BCL2/AKT3/TP53/MAPK8/PIK3R1/MTOR	7
hsa04010	MAPK signaling pathway	2024-10-31	301/8621	5.36473e-08	6.83109e-07	2.33413e-07	PRKACB/FASLG/PPP3CC/AKT3/MAP3K14/TP53/MAPK8/TRAF2/IKBKB/IL1R1	10
hsa04217	Necroptosis	2024-08-31	159/8621	6.17597e-08	7.37256e-07	2.51915e-07	BCL2/FASLG/CHMP7/BIRC3/MAPK8/TNFRSF10A/TRAF2/DNM1L	8
hsa04920	Adipocytokine signaling pathway	6/31	69/8621	1.3252e-07	1.4889e-06	5.08744e-07	PRKCQ/AKT3/MAPK8/TRAF2/MTOR/IKBKB	6
hsa04660	T cell receptor signaling pathway	2024-07-31	121/8621	1.79265e-07	1.9022e-06	6.49967e-07	PRKCQ/PPP3CC/AKT3/MAP3K14/MAPK8/PIK3R1/IKBKB	7
hsa05212	Pancreatic cancer	6/31	76/8621	2.37484e-07	2.38734e-06	8.15735e-07	AKT3/TP53/MAPK8/PIK3R1/MTOR/IKBKB	6
hsa05167	Kaposi sarcoma-associated herpesvirus infection	2024-08-31	194/8621	2.8812e-07	2.75155e-06	9.40182e-07	PPP3CC/AKT3/TP53/MAPK8/PIK3R1/TRAF2/MTOR/IKBKB	8
hsa05169	Epstein-Barr virus infection	2024-08-31	202/8621	3.92776e-07	3.57239e-06	1.22066e-06	BCL2/AKT3/MAP3K14/TP53/MAPK8/PIK3R1/TRAF2/IKBKB	8
hsa05162	Measles	2024-07-31	138/8621	4.41164e-07	3.83011e-06	1.30872e-06	BCL2/FASLG/AKT3/TP53/MAPK8/PIK3R1/IKBKB	7
hsa05418	Fluid shear stress and atherosclerosis	2024-07-31	139/8621	4.63418e-07	3.84838e-06	1.31496e-06	BCL2/AKT3/TP53/MAPK8/PIK3R1/IKBKB/IL1R1	7
hsa04211	Longevity regulating pathway	6/31	89/8621	6.11069e-07	4.66857e-06	1.59521e-06	PRKACB/AKT3/TP53/PIK3R1/APPL1/MTOR	6
hsa05235	PD-L1 expression and PD-1 checkpoint pathway in cancer	6/31	89/8621	6.11069e-07	4.66857e-06	1.59521e-06	PRKCQ/PPP3CC/AKT3/PIK3R1/MTOR/IKBKB	6
hsa04218	Cellular senescence	2024-07-31	156/8621	1.01375e-06	7.20523e-06	2.46197e-06	PPP3CC/ATM/AKT3/TP53/PIK3R1/MTOR/CHEK2	7
hsa05215	Prostate cancer	6/31	97/8621	1.01854e-06	7.20523e-06	2.46197e-06	BCL2/AKT3/TP53/PIK3R1/MTOR/IKBKB	6
hsa05161	Hepatitis B	2024-07-31	162/8621	1.30758e-06	8.91953e-06	3.04773e-06	BCL2/FASLG/AKT3/TP53/MAPK8/PIK3R1/IKBKB	7
hsa04140	Autophagy	2024-07-31	165/8621	1.47941e-06	9.74372e-06	3.32935e-06	PRKCQ/PRKACB/BCL2/AKT3/MAPK8/PIK3R1/MTOR	7
hsa04625	C-type lectin receptor signaling pathway	6/31	104/8621	1.53686e-06	9.78469e-06	3.34335e-06	PPP3CC/AKT3/MAP3K14/MAPK8/PIK3R1/IKBKB	6
hsa04659	Th17 cell differentiation	6/31	108/8621	1.91882e-06	1.14529e-05	3.91338e-06	PRKCQ/PPP3CC/MAPK8/MTOR/IKBKB/IL1R1	6
hsa04931	Insulin resistance	6/31	108/8621	1.91882e-06	1.14529e-05	3.91338e-06	PRKCQ/AKT3/MAPK8/PIK3R1/MTOR/IKBKB	6
hsa04071	Sphingolipid signaling pathway	6/31	121/8621	3.7305e-06	2.15917e-05	7.3777e-06	BCL2/AKT3/TP53/MAPK8/PIK3R1/TRAF2	6
hsa04115	p53 signaling pathway	2024-05-31	74/8621	5.80313e-06	3.22852e-05	1.10316e-05	BCL2/ATM/TP53/TNFRSF10A/CHEK2	5
hsa04068	FoxO signaling pathway	6/31	131/8621	5.91614e-06	3.22852e-05	1.10316e-05	FASLG/ATM/AKT3/MAPK8/PIK3R1/IKBKB	6
hsa04910	Insulin signaling pathway	6/31	137/8621	7.6638e-06	4.06607e-05	1.38934e-05	PRKACB/AKT3/MAPK8/PIK3R1/MTOR/IKBKB	6
hsa04932	Non-alcoholic fatty liver disease	6/31	155/8621	1.55661e-05	7.93365e-05	2.71086e-05	FASLG/AKT3/MAPK8/PIK3R1/TRAF2/IKBKB	6
hsa05165	Human papillomavirus infection	2024-08-31	331/8621	1.57842e-05	7.93365e-05	2.71086e-05	PRKACB/FASLG/ATM/AKT3/TP53/PIK3R1/MTOR/IKBKB	8
hsa05160	Hepatitis C	6/31	158/8621	1.73653e-05	8.50452e-05	2.90593e-05	FASLG/AKT3/TP53/PIK3R1/TRAF2/IKBKB	6
hsa04930	Type II diabetes mellitus	4/31	46/8621	2.00918e-05	9.59385e-05	3.27814e-05	MAPK8/PIK3R1/MTOR/IKBKB	4
hsa05132	Salmonella infection	2024-07-31	249/8621	2.23874e-05	0.000104293	3.5636e-05	BCL2/AKT3/BIRC3/MAPK8/TNFRSF10A/TRAF2/IKBKB	7
hsa04750	Inflammatory mediator regulation of TRP channels	2024-05-31	98/8621	2.30272e-05	0.000104719	3.57817e-05	PRKCQ/PRKACB/MAPK8/PIK3R1/IL1R1	5
hsa05142	Chagas disease	2024-05-31	102/8621	2.79589e-05	0.000124189	4.24345e-05	FASLG/AKT3/MAPK8/PIK3R1/IKBKB	5
hsa05145	Toxoplasmosis	2024-05-31	111/8621	4.20553e-05	0.000182558	6.23787e-05	BCL2/AKT3/BIRC3/MAPK8/IKBKB	5
hsa04621	NOD-like receptor signaling pathway	6/31	186/8621	4.3716e-05	0.00018555	6.34009e-05	BCL2/BIRC3/MAPK8/TRAF2/DNM1L/IKBKB	6
hsa04935	Growth hormone synthesis, secretion and action	2024-05-31	120/8621	6.11304e-05	0.000246842	8.43438e-05	PRKACB/AKT3/MAPK8/PIK3R1/MTOR	5
hsa04213	Longevity regulating pathway	4/31	61/8621	6.18796e-05	0.000246842	8.43438e-05	PRKACB/AKT3/PIK3R1/MTOR	4
hsa05130	Pathogenic Escherichia coli infection	6/31	198/8621	6.20335e-05	0.000246842	8.43438e-05	FASLG/MAPK8/TNFRSF10A/TRAF2/IKBKB/IL1R1	6
hsa04919	Thyroid hormone signaling pathway	2024-05-31	121/8621	6.36046e-05	0.000247928	8.4715e-05	PRKACB/AKT3/TP53/PIK3R1/MTOR	5
hsa05205	Proteoglycans in cancer	6/31	205/8621	7.52772e-05	0.000287559	9.82565e-05	PRKACB/FASLG/AKT3/TP53/PIK3R1/MTOR	6
hsa05221	Acute myeloid leukemia	4/31	67/8621	8.95288e-05	0.000335294	0.000114567	AKT3/PIK3R1/MTOR/IKBKB	4
hsa05230	Central carbon metabolism in cancer	4/31	70/8621	0.000106295	0.00039043	0.000133407	AKT3/TP53/PIK3R1/MTOR	4
hsa05135	Yersinia infection	2024-05-31	137/8621	0.000114791	0.000413682	0.000141352	AKT3/MAPK8/PIK3R1/TRAF2/IKBKB	5
hsa04936	Alcoholic liver disease	2024-05-31	142/8621	0.000135958	0.000479302	0.000163773	FASLG/AKT3/MAP3K14/MAPK8/IKBKB	5
hsa05214	Glioma	4/31	75/8621	0.000139151	0.000479302	0.000163773	AKT3/TP53/PIK3R1/MTOR	4
hsa05017	Spinocerebellar ataxia	2024-05-31	143/8621	0.000140528	0.000479302	0.000163773	AKT3/MAPK8/PIK3R1/TRAF2/MTOR	5
hsa05220	Chronic myeloid leukemia	4/31	76/8621	0.000146513	0.000490948	0.000167753	AKT3/TP53/PIK3R1/IKBKB	4
hsa04014	Ras signaling pathway	6/31	236/8621	0.000163681	0.000539018	0.000184178	PRKACB/FASLG/AKT3/MAPK8/PIK3R1/IKBKB	6
hsa01521	EGFR tyrosine kinase inhibitor resistance	4/31	79/8621	0.000170297	0.000542704	0.000185437	BCL2/AKT3/PIK3R1/MTOR	4
hsa05226	Gastric cancer	2024-05-31	149/8621	0.000170483	0.000542704	0.000185437	BCL2/AKT3/TP53/PIK3R1/MTOR	5
hsa04215	Apoptosis	2024-03-31	32/8621	0.000194601	0.000609323	0.000208201	BCL2/BIRC3/MAPK8	3
hsa04662	B cell receptor signaling pathway	4/31	84/8621	0.000215969	0.000665324	0.000227336	PPP3CC/AKT3/PIK3R1/IKBKB	4
hsa04012	ErbB signaling pathway	4/31	85/8621	0.000226067	0.000675742	0.000230896	AKT3/MAPK8/PIK3R1/MTOR	4
hsa04151	PI3K-Akt signaling pathway	2024-07-31	359/8621	0.000226427	0.000675742	0.000230896	BCL2/FASLG/AKT3/TP53/PIK3R1/MTOR/IKBKB	7
hsa04658	Th1 and Th2 cell differentiation	4/31	92/8621	0.000306539	0.000900753	0.00030778	PRKCQ/PPP3CC/MAPK8/IKBKB	4
hsa05164	Influenza A	2024-05-31	171/8621	0.000323899	0.000937344	0.000320283	FASLG/AKT3/PIK3R1/TNFRSF10A/IKBKB	5
hsa05010	Alzheimer disease	2024-07-31	384/8621	0.000342114	0.00097528	0.000333245	PPP3CC/AKT3/MAPK8/PIK3R1/TRAF2/MTOR/IKBKB	7
hsa05231	Choline metabolism in cancer	4/31	98/8621	0.000390377	0.0010965	0.000374665	AKT3/MAPK8/PIK3R1/MTOR	4
hsa04933	AGE-RAGE signaling pathway in diabetic complications	4/31	100/8621	0.000421645	0.00116716	0.00039881	BCL2/AKT3/MAPK8/PIK3R1	4
hsa04914	Progesterone-mediated oocyte maturation	4/31	102/8621	0.000454667	0.00124059	0.0004239	PRKACB/AKT3/MAPK8/PIK3R1	4
hsa04620	Toll-like receptor signaling pathway	4/31	108/8621	0.000564816	0.00151944	0.000519179	AKT3/MAPK8/PIK3R1/IKBKB	4
hsa04066	HIF-1 signaling pathway	4/31	109/8621	0.000584865	0.00155152	0.000530141	BCL2/AKT3/PIK3R1/MTOR	4
hsa04725	Cholinergic synapse	4/31	113/8621	0.000670153	0.00175341	0.000599128	PRKACB/BCL2/AKT3/PIK3R1	4
hsa05206	MicroRNAs in cancer	6/31	310/8621	0.000708567	0.00181058	0.00061866	BCL2/ATM/TP53/PIK3R1/MTOR/IKBKB	6
hsa04510	Focal adhesion	2024-05-31	203/8621	0.00071096	0.00181058	0.00061866	BCL2/AKT3/BIRC3/MAPK8/PIK3R1	5
hsa05203	Viral carcinogenesis	2024-05-31	204/8621	0.000726983	0.00182702	0.000624279	PRKACB/TP53/PIK3R1/TRAF2/GSN	5
hsa05207	Chemical carcinogenesis	2024-05-31	212/8621	0.000865131	0.00214597	0.000733262	PRKACB/BCL2/AKT3/PIK3R1/MTOR	5
hsa05208	Chemical carcinogenesis	2024-05-31	223/8621	0.0010861	0.00265955	0.000908745	AKT3/MAP3K14/MAPK8/PIK3R1/IKBKB	5
hsa04926	Relaxin signaling pathway	4/31	129/8621	0.00110084	0.00266152	0.000909419	PRKACB/AKT3/MAPK8/PIK3R1	4
hsa04923	Regulation of lipolysis in adipocytes	2024-03-31	58/8621	0.00113642	0.0026797	0.000915631	PRKACB/AKT3/PIK3R1	3
hsa05213	Endometrial cancer	2024-03-31	58/8621	0.00113642	0.0026797	0.000915631	AKT3/TP53/PIK3R1	3
hsa04370	VEGF signaling pathway	2024-03-31	59/8621	0.00119439	0.00272657	0.000931649	PPP3CC/AKT3/PIK3R1	3
hsa04650	Natural killer cell mediated cytotoxicity	4/31	132/8621	0.00119912	0.00272657	0.000931649	FASLG/PPP3CC/PIK3R1/TNFRSF10A	4
hsa04728	Dopaminergic synapse	4/31	132/8621	0.00119912	0.00272657	0.000931649	PRKACB/PPP3CC/AKT3/MAPK8	4
hsa04915	Estrogen signaling pathway	4/31	137/8621	0.00137639	0.00309284	0.0010568	PRKACB/BCL2/AKT3/PIK3R1	4
hsa05224	Breast cancer	4/31	147/8621	0.00178471	0.00395494	0.00135137	AKT3/TP53/PIK3R1/MTOR	4
hsa04664	Fc epsilon RI signaling pathway	2024-03-31	68/8621	0.00180146	0.00395494	0.00135137	AKT3/MAPK8/PIK3R1	3
hsa04917	Prolactin signaling pathway	2024-03-31	70/8621	0.00195815	0.00420231	0.0014359	AKT3/MAPK8/PIK3R1	3
hsa05120	Epithelial cell signaling in Helicobacter pylori infection	2024-03-31	70/8621	0.00195815	0.00420231	0.0014359	MAP3K14/MAPK8/IKBKB	3
hsa04622	RIG-I-like receptor signaling pathway	2024-03-31	71/8621	0.00203958	0.00432844	0.00147899	MAPK8/TRAF2/IKBKB	3
hsa05218	Melanoma	2024-03-31	72/8621	0.0021231	0.00440773	0.00150609	AKT3/TP53/PIK3R1	3
hsa05223	Non-small cell lung cancer	2024-03-31	72/8621	0.0021231	0.00440773	0.00150609	AKT3/TP53/PIK3R1	3
hsa04150	mTOR signaling pathway	4/31	156/8621	0.00221843	0.00455614	0.0015568	AKT3/PIK3R1/MTOR/IKBKB	4
hsa04110	Cell cycle	4/31	157/8621	0.00227074	0.00461395	0.00157655	ATM/TFDP2/TP53/CHEK2	4
hsa04630	JAK-STAT signaling pathway	4/31	166/8621	0.00278053	0.00559033	0.00191017	BCL2/AKT3/PIK3R1/MTOR	4
hsa05225	Hepatocellular carcinoma	4/31	168/8621	0.00290367	0.0057771	0.00197399	AKT3/TP53/PIK3R1/MTOR	4
hsa04310	Wnt signaling pathway	4/31	174/8621	0.00329554	0.00648916	0.00221729	PRKACB/PPP3CC/TP53/MAPK8	4
hsa05152	Tuberculosis	4/31	180/8621	0.00372224	0.00725457	0.00247883	BCL2/PPP3CC/AKT3/MAPK8	4
hsa04657	IL-17 signaling pathway	2024-03-31	94/8621	0.00452387	0.00872787	0.00298224	MAPK8/TRAF2/IKBKB	3
hsa04062	Chemokine signaling pathway	4/31	192/8621	0.00468592	0.0089501	0.00305818	PRKACB/AKT3/PIK3R1/IKBKB	4
hsa04666	Fc gamma R-mediated phagocytosis	2024-03-31	97/8621	0.00493994	0.00934187	0.00319204	AKT3/PIK3R1/GSN	3
hsa05146	Amoebiasis	2024-03-31	102/8621	0.00568353	0.0105819	0.00361575	PRKACB/PIK3R1/IL1R1	3
hsa05415	Diabetic cardiomyopathy	4/31	203/8621	0.00570647	0.0105819	0.00361575	AKT3/MAPK8/PIK3R1/MTOR	4
hsa05022	Pathways of neurodegeneration	6/31	476/8621	0.00620545	0.0113965	0.00389411	BCL2/FASLG/PPP3CC/MAPK8/TRAF2/MTOR	6
hsa04922	Glucagon signaling pathway	2024-03-31	107/8621	0.00649111	0.0118076	0.00403458	PRKACB/PPP3CC/AKT3	3
hsa04024	cAMP signaling pathway	4/31	225/8621	0.00817511	0.0147306	0.00503333	PRKACB/AKT3/MAPK8/PIK3R1	4
hsa05014	Amyotrophic lateral sclerosis	2024-05-31	364/8621	0.00896331	0.0159999	0.00546705	BCL2/PPP3CC/TP53/TRAF2/MTOR	5
hsa04152	AMPK signaling pathway	2024-03-31	121/8621	0.00910434	0.0161012	0.00550165	AKT3/PIK3R1/MTOR	3
hsa04611	Platelet activation	2024-03-31	124/8621	0.00973358	0.0170561	0.00582793	PRKACB/AKT3/PIK3R1	3
hsa04973	Carbohydrate digestion and absorption	2/31	47/8621	0.0122334	0.0212417	0.0072581	AKT3/PIK3R1	2
hsa04371	Apelin signaling pathway	2024-03-31	139/8621	0.0132577	0.0228129	0.00779497	PRKACB/AKT3/MTOR	3
hsa05020	Prion disease	4/31	272/8621	0.0155983	0.0265041	0.00905624	PRKACB/PPP3CC/MAPK8/PIK3R1	4
hsa04072	Phospholipase D signaling pathway	2024-03-31	148/8621	0.0156804	0.0265041	0.00905624	AKT3/PIK3R1/MTOR	3
hsa04340	Hedgehog signaling pathway	2/31	56/8621	0.0170825	0.0286207	0.00977945	PRKACB/BCL2	2
hsa04261	Adrenergic signaling in cardiomyocytes	2024-03-31	154/8621	0.0174261	0.0289425	0.00988943	PRKACB/BCL2/AKT3	3
hsa04929	GnRH secretion	2/31	64/8621	0.0219689	0.036173	0.01236	AKT3/PIK3R1	2
hsa04141	Protein processing in endoplasmic reticulum	2024-03-31	169/8621	0.0222521	0.036326	0.0124123	BCL2/MAPK8/TRAF2	3
hsa05016	Huntington disease	4/31	306/8621	0.0230108	0.0372463	0.0127267	TP53/MAPK8/TRAF2/MTOR	4
hsa04720	Long-term potentiation	2/31	67/8621	0.0239342	0.0384154	0.0131262	PRKACB/PPP3CC	2
hsa04924	Renin secretion	2/31	69/8621	0.0252833	0.0395828	0.0135251	PRKACB/PPP3CC	2
hsa05031	Amphetamine addiction	2/31	69/8621	0.0252833	0.0395828	0.0135251	PRKACB/PPP3CC	2
hsa05211	Renal cell carcinoma	2/31	69/8621	0.0252833	0.0395828	0.0135251	AKT3/PIK3R1	2
hsa04137	Mitophagy	2/31	72/8621	0.027364	0.0424921	0.0145192	TP53/MAPK8	2
hsa04613	Neutrophil extracellular trap formation	2024-03-31	191/8621	0.0305309	0.0470275	0.0160689	AKT3/PIK3R1/MTOR	3
hsa05100	Bacterial invasion of epithelial cells	2/31	77/8621	0.0309805	0.0473382	0.0161751	PIK3R1/ARHGAP10	2
hsa05202	Transcriptional misregulation in cancer	2024-03-31	193/8621	0.0313543	0.0475292	0.0162403	ATM/TP53/BIRC3	3
hsa04912	GnRH signaling pathway	2/31	93/8621	0.0437233	0.0657571	0.0224687	PRKACB/MAPK8	2
hsa04810	Regulation of actin cytoskeleton	2024-03-31	229/8621	0.0481657	0.0718723	0.0245582	AKT3/PIK3R1/GSN	3
hsa05171	Coronavirus disease	2024-03-31	232/8621	0.0497341	0.0736373	0.0251613	MAPK8/PIK3R1/IKBKB	3
hsa04928	Parathyroid hormone synthesis, secretion and action	2/31	106/8621	0.0552728	0.0812085	0.0277483	PRKACB/BCL2	2
hsa04724	Glutamatergic synapse	2/31	115/8621	0.0638318	0.0930677	0.0318005	PRKACB/PPP3CC	2
hsa05012	Parkinson disease	2024-03-31	266/8621	0.0692341	0.10018	0.0342306	PRKACB/TP53/MAPK8	3
hsa00900	Terpenoid backbone biosynthesis	2024-01-31	23/8621	0.0796122	0.114121	0.0389941	FNTA	1
hsa04114	Oocyte meiosis	2/31	131/8621	0.0800637	0.114121	0.0389941	PRKACB/PPP3CC	2
hsa04270	Vascular smooth muscle contraction	2/31	134/8621	0.0832398	0.117769	0.0402407	PRKCQ/PRKACB	2
hsa04060	Cytokine-cytokine receptor interaction	2024-03-31	297/8621	0.0896291	0.125876	0.0430109	FASLG/TNFRSF10A/IL1R1	3
hsa04550	Signaling pathways regulating pluripotency of stem cells	2/31	143/8621	0.0929977	0.129654	0.0443016	AKT3/PIK3R1	2
hsa04723	Retrograde endocannabinoid signaling	2/31	148/8621	0.0985592	0.136412	0.0466108	PRKACB/MAPK8	2
hsa01523	Antifolate resistance	2024-01-31	30/8621	0.1026	0.140982	0.0481724	IKBKB	1
hsa04921	Oxytocin signaling pathway	2/31	154/8621	0.105357	0.143737	0.0491136	PRKACB/PPP3CC	2
hsa04136	Autophagy	2024-01-31	32/8621	0.109065	0.14774	0.0504816	MTOR	1
hsa04022	cGMP-PKG signaling pathway	2/31	167/8621	0.120509	0.162094	0.0553861	PPP3CC/AKT3	2
hsa04530	Tight junction	2/31	170/8621	0.124082	0.163568	0.0558898	PRKACB/MAPK8	2
hsa04960	Aldosterone-regulated sodium reabsorption	2024-01-31	37/8621	0.125031	0.163568	0.0558898	PIK3R1	1
hsa05143	African trypanosomiasis	2024-01-31	37/8621	0.125031	0.163568	0.0558898	FASLG	1
hsa05216	Thyroid cancer	2024-01-31	37/8621	0.125031	0.163568	0.0558898	TP53	1
hsa05330	Allograft rejection	2024-01-31	38/8621	0.128191	0.166561	0.0569124	FASLG	1
hsa03440	Homologous recombination	2024-01-31	41/8621	0.137604	0.175216	0.0598698	ATM	1
hsa04216	Ferroptosis	2024-01-31	41/8621	0.137604	0.175216	0.0598698	TP53	1
hsa05219	Bladder cancer	2024-01-31	41/8621	0.137604	0.175216	0.0598698	TP53	1
hsa04360	Axon guidance	2/31	182/8621	0.138629	0.175352	0.0599165	PPP3CC/PIK3R1	2
hsa05332	Graft-versus-host disease	2024-01-31	42/8621	0.14072	0.176826	0.0604199	FASLG	1
hsa04940	Type I diabetes mellitus	2024-01-31	43/8621	0.143825	0.179546	0.0613495	FASLG	1
hsa04962	Vasopressin-regulated water reabsorption	2024-01-31	44/8621	0.146919	0.182218	0.0622623	PRKACB	1
hsa04672	Intestinal immune network for IgA production	2024-01-31	49/8621	0.162228	0.198625	0.0678687	MAP3K14	1
hsa05030	Cocaine addiction	2024-01-31	49/8621	0.162228	0.198625	0.0678687	PRKACB	1
hsa05110	Vibrio cholerae infection	2024-01-31	50/8621	0.165258	0.201046	0.0686958	PRKACB	1
hsa04913	Ovarian steroidogenesis	2024-01-31	51/8621	0.168277	0.203423	0.0695081	PRKACB	1
hsa04015	Rap1 signaling pathway	2/31	210/8621	0.173902	0.206759	0.0706478	AKT3/PIK3R1	2
hsa04961	Endocrine and other factor-regulated calcium reabsorption	2024-01-31	53/8621	0.174284	0.206759	0.0706478	PRKACB	1
hsa05320	Autoimmune thyroid disease	2024-01-31	53/8621	0.174284	0.206759	0.0706478	FASLG	1
hsa04714	Thermogenesis	2/31	232/8621	0.202586	0.238682	0.0815559	PRKACB/MTOR	2
hsa05217	Basal cell carcinoma	2024-01-31	63/8621	0.203692	0.238682	0.0815559	TP53	1
hsa04927	Cortisol synthesis and secretion	2024-01-31	65/8621	0.209451	0.243934	0.0833503	PRKACB	1
hsa04020	Calcium signaling pathway	2/31	253/8621	0.230483	0.266801	0.0911638	PRKACB/PPP3CC	2
hsa04623	Cytosolic DNA-sensing pathway	2024-01-31	75/8621	0.237646	0.271708	0.0928404	IKBKB	1
hsa04918	Thyroid hormone synthesis	2024-01-31	75/8621	0.237646	0.271708	0.0928404	PRKACB	1
hsa04971	Gastric acid secretion	2024-01-31	76/8621	0.240412	0.271708	0.0928404	PRKACB	1
hsa05133	Pertussis	2024-01-31	76/8621	0.240412	0.271708	0.0928404	MAPK8	1
hsa04742	Taste transduction	2024-01-31	86/8621	0.267537	0.298828	0.102107	PRKACB	1
hsa04911	Insulin secretion	2024-01-31	86/8621	0.267537	0.298828	0.102107	PRKACB	1
hsa04540	Gap junction	2024-01-31	88/8621	0.272848	0.302406	0.10333	PRKACB	1
hsa04727	GABAergic synapse	2024-01-31	89/8621	0.27549	0.302406	0.10333	PRKACB	1
hsa04976	Bile secretion	2024-01-31	89/8621	0.27549	0.302406	0.10333	PRKACB	1
hsa05032	Morphine addiction	2024-01-31	91/8621	0.280746	0.306414	0.104699	PRKACB	1
hsa04970	Salivary secretion	2024-01-31	93/8621	0.285964	0.310336	0.106039	PRKACB	1
hsa05414	Dilated cardiomyopathy	2024-01-31	96/8621	0.293724	0.316155	0.108028	PRKACB	1
hsa04070	Phosphatidylinositol signaling system	2024-01-31	97/8621	0.296292	0.316155	0.108028	PIK3R1	1
hsa04713	Circadian entrainment	2024-01-31	97/8621	0.296292	0.316155	0.108028	PRKACB	1
hsa04925	Aldosterone synthesis and secretion	2024-01-31	98/8621	0.298851	0.317114	0.108355	PRKACB	1
hsa04640	Hematopoietic cell lineage	2024-01-31	99/8621	0.301401	0.318054	0.108676	IL1R1	1
hsa04061	Viral protein interaction with cytokine and cytokine receptor	2024-01-31	100/8621	0.303943	0.318973	0.10899	TNFRSF10A	1
hsa04916	Melanogenesis	2024-01-31	101/8621	0.306475	0.319873	0.109298	PRKACB	1
hsa04670	Leukocyte transendothelial migration	2024-01-31	115/8621	0.341005	0.352064	0.120298	PIK3R1	1
hsa04726	Serotonergic synapse	2024-01-31	115/8621	0.341005	0.352064	0.120298	PRKACB	1
hsa04120	Ubiquitin mediated proteolysis	2024-01-31	142/8621	0.40296	0.413792	0.141389	BIRC3	1
hsa04934	Cushing syndrome	2024-01-31	155/8621	0.430742	0.439956	0.150329	PRKACB	1
hsa04390	Hippo signaling pathway	2024-01-31	157/8621	0.434903	0.441843	0.150974	BIRC3	1
hsa05034	Alcoholism	2024-01-31	188/8621	0.495763	0.501009	0.171191	PRKACB	1
hsa04144	Endocytosis	2024-01-31	250/8621	0.599032	0.602185	0.205762	CHMP7	1
hsa04740	Olfactory transduction	2024-01-31	439/8621	0.802714	0.802714	0.274281	PRKACB	1

## Sheet: Table S5
Table S5. Drug-gene interaction network based on the data from DGIdb.
gene_name	gene_claim_name	entrez_id	interaction_claim_source	interaction_types	drug_claim_name	drug_claim_primary_name	drug_name	drug_concept_id	interaction_group_score	PMIDs
MAPK8	MAPK8	5599	DTC		JNJ-7706621	JNJ-7706621	JNJ-7706621	chembl:CHEMBL191003	0.03
MAPK8	MAPK8	5599	NCI		OXYTOCIN	OXYTOCIN	OXYTOCIN	chembl:CHEMBL395429	0.34	11566737
MAPK8	JNK1	5599	ChemblInteractions	inhibitor	CHEMBL1950289	TANZISERTIB	TANZISERTIB	chembl:CHEMBL1950289	1.52
MAPK8	MAPK8	5599	DTC		CENISERTIB	CENISERTIB	CENISERTIB	chembl:CHEMBL1967878	0.01
AKT3	RAC-gamma serine/threonine-protein kinase	10000	TTD		BAY1125976	BAY1125976
AKT3	RAC-gamma serine/threonine-protein kinase	10000	TTD		GSK2141795	GSK2141795	UPROSERTIB	chembl:CHEMBL3137336	1.38
MAPK8	MAPK8	5599	NCI		KEYHOLE LIMPET HEMOCYANIN	KEYHOLE LIMPET HEMOCYANIN				15857404
MAPK8	5599	5599	GuideToPharmacology	inhibitor	178102620	JNK INHIBITOR VIII
MAPK8	5599	5599	GuideToPharmacology	inhibitor	328083479	JNK INHIBITOR 9L
MAPK8	P45983	5599	TdgClinicalTrial		JNK-401	JNK-401
MAPK8	Stress-activated protein kinase JNK1	5599	TTD		PMID25991433-Compound-L1	PMID25991433-Compound-L1
MAPK8	Stress-activated protein kinase JNK1	5599	TTD		PMID25991433-Compound-K1	PMID25991433-Compound-K1
AKT3	Q9Y243	10000	TdgClinicalTrial		PERIFOSINE	PERIFOSINE	PERIFOSINE	chembl:CHEMBL372764	0.55
MAPK8	Stress-activated protein kinase JNK1	5599	TTD		PMID25991433-Compound-A1	PMID25991433-Compound-A1
MAPK8	MAPK8	5599	DTC		AG-1879	AG-1879	CHEMBL406845	chembl:CHEMBL406845	0.05
AKT3	AKT3	10000	ClearityFoundationClinicalTrial		N/A	N/A
MAPK8	5599	5599	GuideToPharmacology	inhibitor	363894130	TANZISERTIB	TANZISERTIB	chembl:CHEMBL1950289	1.52
MAPK8	MAPK8	5599	NCI		DOXYCYCLINE	DOXYCYCLINE	DOXYCYCLINE	chembl:CHEMBL1433	0.32	16202406	15728539
AKT3	RAC-gamma serine/threonine-protein kinase	10000	TTD		LYS-6KAKT1	LYS-6KAKT1
MAPK8	Stress-activated protein kinase JNK1	5599	TTD		PMID25991433-Compound-G5	PMID25991433-Compound-G5
MAPK8	MAPK8	5599	DTC		SB-202190	SB-202190	SB-202190	chembl:CHEMBL278041	0.09	22951114
AKT3	10000	10000	GuideToPharmacology	inhibitor	249565884	A-443654	A-443654	chembl:CHEMBL379300	0.21
MAPK8	Stress-activated protein kinase JNK1	5599	TTD		PMID25991433-Compound-O3	PMID25991433-Compound-O3
MAPK8	MAPK8	5599	NCI		BCG	BCG	BCG VACCINE	wikidata:Q798309	0.25	14742634
AKT3	10000	10000	GuideToPharmacology	inhibitor	223366042	CAPIVASERTIB	CAPIVASERTIB	chembl:CHEMBL2325741	0.92
MAPK8	Stress-activated protein kinase JNK1	5599	TTD		PMID25991433-Compound-E4	PMID25991433-Compound-E4
MAPK8	Stress-activated protein kinase JNK1	5599	TTD		PMID25991433-Compound-G1	PMID25991433-Compound-G1
AKT3	RAC-gamma serine/threonine-protein kinase	10000	TTD		M2698	M2698	MSC-2363318A	chembl:CHEMBL3545003	0.92
MAPK8	JNK1	5599	ChemblInteractions	inhibitor	CHEMBL1614713	CC-401	CC-401	chembl:CHEMBL1614713	1.01
MAPK8	MAPK8	5599	NCI		ICRF-187	ICRF-187	DEXRAZOXANE	chembl:CHEMBL1738	0.51	10487526
MAPK8	Stress-activated protein kinase JNK1	5599	TTD		PMID25991433-Compound-A3	PMID25991433-Compound-A3
MAPK8	MAPK8	5599	NCI		PLATINUM	PLATINUM	PLATINUM	chembl:CHEMBL1235478	0.22	12181446
AKT3	AKT3	10000	MyCancerGenomeClinicalTrial	inhibitor	EVEROLIMUS	EVEROLIMUS	EVEROLIMUS	chembl:CHEMBL1908360	0.07
MAPK8	MAPK8	5599	DTC		PAZOPANIB	PAZOPANIB	PAZOPANIB	chembl:CHEMBL477772	0.04
AKT3	AKT3	10000	CIViC		AKT INHIBITOR MK2206	AKT INHIBITOR MK2206				27297869
MAPK8	Stress-activated protein kinase JNK1	5599	TTD		NKP-1339	NKP-1339	IT-139	chembl:CHEMBL4297410	0.76
MAPK8	Stress-activated protein kinase JNK1	5599	TTD		7-azaindole derivative 1	7-azaindole derivative 1
AKT3	AKT3	10000	ClearityFoundationClinicalTrial		AZD5363	AZD5363	CAPIVASERTIB	chembl:CHEMBL2325741	0.92
MAPK8	MAPK8	5599	NCI		TCDD	TCDD				16080534
AKT3	10000	10000	GuideToPharmacology	inhibitor	178101884	GSK690693	GSK-690693	chembl:CHEMBL494089	0.38
MAPK8	Stress-activated protein kinase JNK1	5599	TTD		PMID25991433-Compound-J3	PMID25991433-Compound-J3
MAPK8	MAPK8	5599	NCI		GEFITINIB	GEFITINIB	GEFITINIB	chembl:CHEMBL939	0.04	17205515
MAPK8	MAPK8	5599	DTC		TAMATINIB	TAMATINIB	R-406	chembl:CHEMBL475251	0.02
MAPK8	MAPK8	5599	DTC		CARDAMOMIN	CARDAMOMIN	CARDAMOMIN	chembl:CHEMBL378104	1.01	25959811
MAPK8	5599	5599	GuideToPharmacology	inhibitor	178101956	SP600125
MAPK8	Stress-activated protein kinase JNK1	5599	TTD		PMID25991433-Compound-H3	PMID25991433-Compound-H3
MAPK8	MAPK8	5599	NCI		ALPHA-TOCOPHEROL	ALPHA-TOCOPHEROL	VITAMIN E	chembl:CHEMBL47	0.28	16909121
MAPK8	Stress-activated protein kinase JNK1	5599	TTD		PMID25991433-Compound-G4	PMID25991433-Compound-G4
AKT3	PKBG	10000	ChemblInteractions	inhibitor	CHEMBL3545134	LY-2780301	LY-2780301	chembl:CHEMBL3545134	0.55
MAPK8	MAPK8	5599	NCI		BLEOMYCIN	BLEOMYCIN	BLEOMYCIN	chembl:CHEMBL403664	0.16	16148050
MAPK8	Stress-activated protein kinase JNK1	5599	TTD		PMID25991433-Compound-E2	PMID25991433-Compound-E2
AKT3	AKT3	10000	DTC		FASUDIL	FASUDIL	FASUDIL	chembl:CHEMBL38380	0.09
MAPK8	Stress-activated protein kinase JNK1	5599	TTD		PMID25991433-Compound-H2	PMID25991433-Compound-H2
AKT3	PKBG	10000	ChemblInteractions	inhibitor	CHEMBL3545000	MK-2201	MK-2201	chembl:CHEMBL3545000	0.92
MAPK8	Stress-activated protein kinase JNK1	5599	TTD		PMID25991433-Compound-A2	PMID25991433-Compound-A2
AKT3	RAC-gamma serine/threonine-protein kinase	10000	TTD		AZD5363	AZD5363	CAPIVASERTIB	chembl:CHEMBL2325741	0.92
AKT3	RAC-gamma serine/threonine-protein kinase	10000	TTD		ARQ 092	ARQ 092
AKT3	RAC-gamma serine/threonine-protein kinase	10000	TTD		XL418	XL418	XL-418	chembl:CHEMBL3544935	2.21	19644473
MAPK8	Stress-activated protein kinase JNK1	5599	TTD		PMID25991433-Compound-A11	PMID25991433-Compound-A11
MAPK8	Jun N terminal kinase	5599	TTD		CC-401	CC-401	CC-401	chembl:CHEMBL1614713	1.01
MAPK8	MAPK8	5599	DTC		RHAMNETIN	RHAMNETIN	RHAMNETIN	chembl:CHEMBL312163	0.3	24397781
AKT3	AKT3	10000	ClearityFoundationClinicalTrial		TRICIRIBINE	TRICIRIBINE	TRICIRIBINE	chembl:CHEMBL331237	1.11
MAPK8	MAPK8	5599	DTC		TAK-715	TAK-715	TAK-715	chembl:CHEMBL363648	0.06
MAPK8	Stress-activated protein kinase JNK1	5599	TTD		PMID25991433-Compound-P6	PMID25991433-Compound-P6
MAPK8	Stress-activated protein kinase JNK1	5599	TTD		PMID25991433-Compound-A7	PMID25991433-Compound-A7
AKT3	RAC-gamma serine/threonine-protein kinase	10000	TTD		MK-2206	MK-2206	MK-2206	chembl:CHEMBL1079175	0.98
MAPK8	Stress-activated protein kinase JNK1	5599	TTD		PMID25991433-Compound-P5	PMID25991433-Compound-P5
AKT3	10000	10000	GuideToPharmacology	allosteric modulator	178102544	AKT INHIBITOR VIII
AKT3	10000	10000	GuideToPharmacology	allosteric modulator	249565628	MK-2206	MK-2206	chembl:CHEMBL1079175	0.98
